# Supplementary material for: Carbonylation as a novel method for the assembly of pyrazine based oligoamide alpha-helix mimetics
Source: Royal Society of Chemistry journal article supplement (doi:10.1039/c6ob02358d), 2016-11-29
Supplement: c6ob02358d1.pdf [file c6ob02358d1.pdf]

## Supporting Information for

# Carbonylation as a novel method for the assembly of pyrazine based oligoamide alpha-helix mimetics

Seger Van Mileghem,<sup>†a</sup> Brecht Egle,<sup>†a</sup> Philippe Gilles,<sup>a</sup> Cedrick Veryser,<sup>a</sup> Luc Van Meervelt<sup>b</sup>  
and Wim M. De Borggraeve<sup>\*a</sup>

(†) Authors contributed equally

(a) Molecular Design and Synthesis, Department of chemistry, KU Leuven, Celestijnenlaan 200F, 3001 Heverlee, Belgium

(b) Biochemistry, Molecular and Structural Biology Section, Department of Chemistry, KU Leuven, Celestijnenlaan 200F, 3001 Heverlee, Belgium

(\*) [wim.deborggraeve@kuleuven.be](mailto:wim.deborggraeve@kuleuven.be)

## Table of contents

|                                                                                             |            |
|---------------------------------------------------------------------------------------------|------------|
| <b>1 General Considerations</b> .....                                                       | <b>2</b>   |
| <sup>1</sup> H NMR spectra .....                                                            | 2          |
| <sup>13</sup> C NMR spectra .....                                                           | 2          |
| IR spectra .....                                                                            | 2          |
| Mass spectra .....                                                                          | 2          |
| Melting points .....                                                                        | 2          |
| Chromatography .....                                                                        | 2          |
| X-ray diffraction experiments .....                                                         | 3          |
| <b>2 Preparation of building blocks</b> .....                                               | <b>4</b>   |
| General Procedures for S <sub>N</sub> Ar with alcohols on 3,5-dibromo-2-aminopyrazine ..... | 5          |
| <b>3 Synthesis of multimers</b> .....                                                       | <b>7</b>   |
| General procedure for diBoc protection .....                                                | 7          |
| General procedures for carbonylative coupling .....                                         | 9          |
| <b>4 X-ray structure determination</b> .....                                                | <b>28</b>  |
| <b>5 NMR Spectra</b> .....                                                                  | <b>46</b>  |
| <b>6 References</b> .....                                                                   | <b>115</b> |

# 1 General Considerations

## **<sup>1</sup>H NMR spectra**

Bruker 300 Avance (300 MHz), Bruker 400 Avance (400 MHz) and Bruker 600 Avance II<sup>+</sup> (600 MHz) with tetramethylsilane as internal standard with CDCl<sub>3</sub> and DMSO. The  $\delta$ -values are expressed in ppm.

## **<sup>13</sup>C NMR spectra**

Bruker 300 Avance (operating at 75 MHz), Bruker 400 Avance (operating at 100 MHz) and Bruker 600 Avance II<sup>+</sup> (operating at 150 MHz) with the deuterated solvent as internal standard (CDCl<sub>3</sub>: 77.2 ppm, triplet; DMSO: 39.52 ppm, quintet). The  $\delta$ -values are expressed in ppm.

## **IR spectra**

- Perkin-Elmer 1720 Infrared Fourier Transform Spectrometer and Perkin Elmer 297 grating IR-spectrophotometer. The crystalline products are measured in KBr-pills. The oils are measured between NaCl plates.
- Bruker Alpha-T FT-IR spectrometer with universal sampling module. Data processing using Opus software.

## **Mass spectra**

Spectra were acquired on a quadrupole orthogonal acceleration time-of-flight mass spectrometer (Synapt G2 HDMS, Waters, Milford, MA).

Samples were infused at 3  $\mu$ L/min and spectra were obtained in positive (or: negative) ionization mode with a resolution of 15000 (FWHM) using leucine enkephalin as lock mass.

## **Melting points**

Reichert-Jung Thermovar (the measurements are not corrected).

## **Chromatography**

- TLC plates: pre-coated TLC-plates SIL G-25 (with fluorescence-indicator 254 nm): layer thickness 0.25 mm; average pore diameter 60 Å; 20x20 cm glass plates
- Silica gel for column chromatography: MP Silica 32-63, average pore diameter 60 Å, Ecochron

- MPLC apparatus: Büchi Sepacore™ flash apparatus, consisting of a C-660 Büchi fraction collector, C-615 Pump manager, C-635 UV-photometer, two C-605 pump modules and a Linseis D120S plotter.
- Reverse phase HPLC: Waters Delta 600 analytical/preparative system equipped with Waters 996 Photo Diode Array Detector. Preparative column size: Alltech C18 Prevail 5 µm, 150x22 mm, and Phenomenex Luna C18, 5 µm, 150x22 mm.

### **X-ray diffraction experiments**

Crystal structures were determined on an Agilent SuperNova diffractometer (single source at offset, Eos detector). Using Olex2<sup>a</sup>, the structure was solved with the ShelXS<sup>b</sup> structure solution program using Direct Methods and refined with the ShelXL<sup>c</sup> refinement package using least-squares minimization.

---

<sup>a</sup> Dolomanov, O.V., Bourhis, L.J., Gildea, R.J., Howard, J.A.K. & Puschmann, H. *J., Appl. Cryst.* **2009**, 42, 339-341.

<sup>b</sup> Sheldrick, G.M., *Acta Cryst.* **2008**, A64, 112-122.

<sup>c</sup> Sheldrick, G.M., *Acta Cryst.* **2015**, C71, 3-8.

## 2 Preparation of building blocks

### 3,5-Dibromo-2-aminopyrazine

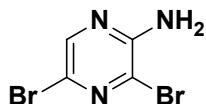

Pyrazin-2-amine (5 g, 52.6 mmol) was dissolved in a mixture of DMSO (100 mL) and water (2.5 ml). The solution was subsequently cooled to <15 °C. NBS (20 g, 112 mmol) was added slowly over a period of approx. 50 min. Afterwards the reaction was stirred at RT for 6 hours. The reaction mixture was then poured into 300 mL of ice water. The aqueous phase was extracted with EtOAc. The organic fraction was washed with sat. NaHCO<sub>3</sub> solution, water and afterwards dried over MgSO<sub>4</sub>. The solvent was evaporated *in vacuo* to obtain a brown colored solid. The crude product was purified by column chromatography (heptanes/EtOAc 6:4) to give 3,5-dibromopyrazin-2-amine (11.5 g, 72%) as white-yellow crystals.  $R_f = 0.42$ . Melting point: 86-88 °C. <sup>1</sup>H-NMR (300 MHz, CDCl<sub>3</sub>, ppm):  $\delta$  5.06 (bs, 2H), 8.04 (s, 1H). <sup>13</sup>C-NMR (75 MHz, CDCl<sub>3</sub>, ppm):  $\delta$  123.6, 123.9, 143.1, 151.9. FT-IR (cm<sup>-1</sup>): 3338, 2953. HR-MS: Calculated mass: 251.8768 Mass found: 251.8779.

### 5-Bromo-3-methoxypyrazin-2-amine (1a)

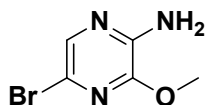

A solution of 3,5-dibromopyrazin-2-amine (1 g, 3.95 mmol) in 3 mL of dry methanol was prepared and cooled to 0 °C. NaOMe (1 mL of a 25% solution in MeOH) was then added dropwise while vigorous stirring the mixture. After addition, the reaction mixture was set to reflux for 16 hours. Afterwards the solution was allowed to cool to RT and left standing overnight. The resulting precipitate was filtered, washed with ice-cold methanol and air-dried to give 5-bromo-3-methoxypyrazin-2-amine **1a** (670 mg, 83%) as a white solid. Melting point: 137-139 °C. <sup>1</sup>H-NMR (400 MHz, CDCl<sub>3</sub>, ppm):  $\delta$  4.00 (s, 3H), 4.85 (s, 2H), 7.63 (s, 1H). <sup>13</sup>C-NMR (101 MHz, CDCl<sub>3</sub>, ppm):  $\delta$  54.4, 121.1, 134.4, 144.2, 147.7. FT-IR (cm<sup>-1</sup>): 3484 (s, -NH<sub>2</sub>). HR-MS: Calculated mass: 202.9694 Mass found: 202.9703.

## General Procedures for S<sub>N</sub>Ar with alcohols on 3,5-dibromo-2-aminopyrazine

**Procedure A:** *with NaH:* The alcohol (1.5 eq.) was dissolved in dry THF (0.25 M) under an argon atmosphere. This solution was then cooled to 0 °C and NaH (1.5 eq.) was slowly added (**Caution:** *evolution of hydrogen gas!*), keeping the temperature at 0 °C. The suspension was then allowed to stir at 0 °C for 30 min. 3,5-dibromo-2-aminopyrazine (**10**) (1 eq.), dissolved in dry THF (0.4 M), was then slowly added while keeping the temperature at 0 °C. After addition, the reaction mixture is allowed to heat to RT and then heated at 50 °C for 18 hours. The reaction mixture was subsequently cooled to RT and diluted with EtOAc. The organic phase was then washed with water and brine before being dried over MgSO<sub>4</sub> and evaporated *in vacuo*. The crude product was then purified using MPLC.

**Procedure B:** *with NaHMDS:* The alcohol (1.5 eq.) was dissolved in dry THF (0.15 M) under an argon atmosphere. This solution was then cooled to 0 °C and NaHMDS (1.5 eq., 1 M solution in THF) was slowly added, keeping the temperature at 0 °C. The suspension was then allowed to stir at RT for 30 min. 3,5-dibromo-2-aminopyrazine (**10**) (1 eq.), dissolved in dry THF (0.4 M), was then slowly added while keeping the temperature at 0 °C. After addition, the reaction mixture is allowed to heat to RT and then heated at 50 °C for 18 hours. The reaction mixture was subsequently cooled to RT and diluted with EtOAc. The organic phase was then washed with water and brine before being dried over MgSO<sub>4</sub> and evaporated *in vacuo*. The crude product was then purified using MPLC.

### 5-Bromo-3-isobutoxypyrazin-2-amine (**1b**)

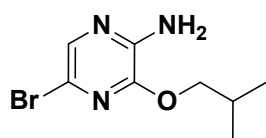

Using **procedure B**, purified by reverse phase HPLC in ACN/water (from 0% to 80% ACN in 30 minutes), **1b** was obtained as a red oil (88%). <sup>1</sup>H-NMR (300 MHz, CDCl<sub>3</sub>, ppm): δ 1.02 (d, J = 6.7 Hz, 6H), 2.12 (m, 1H), 4.13 (d, J = 6.7 Hz, 2H), 4.77 (bs, 2H), 7.62 (s, 1H). <sup>13</sup>C-NMR (150MHz, CDCl<sub>3</sub>, ppm): δ 19.2, 27.8, 73.4, 121.1, 134.1, 144.2, 147.5. HR-MS: Calculated mass: 246.0237 Mass found: 246.0254.

### 3-(Benzyloxy)-5-bromopyrazin-2-amine (**1c**)

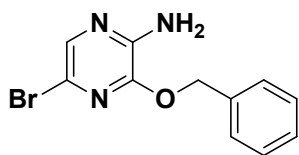

Using general **procedure A**, purified using MPLC (7/3 heptanes/EtOAc), **1c** was obtained as yellow crystals (81%).  $R_f = 0.13$ . All analytical data were found to be in accordance with the literature.<sup>2</sup>

### 5-Bromo-3-isopropoxy-pyrazin-2-amine (**1d**)

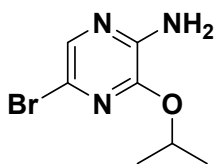

Using general **procedure A** (10 eq. IPA, 3 eq. NaH), **1d** was obtained as a yellow solid (91%) and was used after extraction (EtOAc/H<sub>2</sub>O) without further purification. Melting point: 105-106 °C. <sup>1</sup>H-NMR (300 MHz, CDCl<sub>3</sub>, ppm):  $\delta$  1.37 (s, 6H), 4.77 (bs, 2H), 5.32 (m, J = 6 Hz, 1H), 7.60 (s, 1H). <sup>13</sup>C-NMR (75 MHz, CDCl<sub>3</sub>, ppm):  $\delta$  21.8, 70.5, 121.0, 133.3, 144.3, 146.9.

### 3 Synthesis of multimers

#### General procedure for diBoc protection

**Procedure C:** For diBoc protection of pyrazine building blocks:

The amine (1 eq.) and DMAP (0.1 eq.) were dissolved in dry DCM (0.2 M) under an argon atmosphere. Boc<sub>2</sub>O (2.5 eq.) was then slowly added at RT, while stirring vigorously. Afterwards the reaction was heated to reflux for 16 hours. The mixture was then cooled to RT and the solvent was evaporated *in vacuo*. The residue was suspended in EtOAc and washed with water and brine. The organic phase was then dried over MgSO<sub>4</sub>, filtered and evaporated *in vacuo*.

#### di-*tert*-Butyl (5-bromo-3-methoxypyrazin-2-yl)imidodicarbonate (2a)

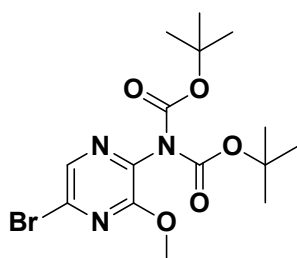

5-Bromo-3-methoxypyrazin-2-amine (**1a**) (1 g, 4.90 mmol) was dissolved in THF (Volume: 20 mL) and cooled to < 5 °C in an ice bath. Boc<sub>2</sub>O (2.84 mL, 12.25 mmol) was slowly added and the mixture was stirred for 1 hour in the ice bath. Afterwards the solution was allowed to warm to RT and left stirring overnight. Water was added (20 mL) and the aqueous phase was extracted with EtOAc. The combined EtOAc fractions were washed with sat. NaHCO<sub>3</sub>, water and subsequently dried over MgSO<sub>4</sub>. The solvent was evaporated *in vacuo* to give the crude product. Purification was carried out by MPLC (9/1 heptanes/EtOAc) to give **2a** as white crystals (1.8 g, 91%). R<sub>f</sub> = 0.19. Melting point: 74-76 °C. <sup>1</sup>H-NMR (300 MHz, CDCl<sub>3</sub>, ppm): δ 1.42 (s, 18H), 4.02 (s, 3H), 8.12 (s, 1H). <sup>13</sup>C-NMR (75 MHz, CDCl<sub>3</sub>, ppm): δ 27.8, 54.9, 83.6, 134.9, 136.3, 136.9, 149.9, 155.2. FT-IR (cm<sup>-1</sup>): 1797 (s, carbamate). HR-MS: Calculated mass: 403.0768 Mass found: 403.0743.

**di-tert-Butyl (5-bromo-3-isobutoxypyrazin-2-yl)imidodicarbonate (2b)**

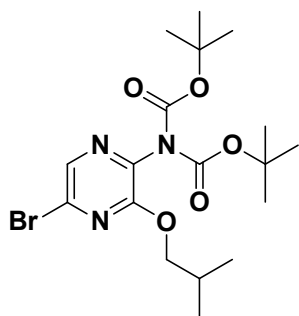

Prepared using **procedure C**, purified using MPLC (8/2 heptanes/EtOAc), **2b** was obtained as an off-white solid (81%).  $R_f = 0.40$ . Melting point 73-76 °C.  $^1\text{H-NMR}$  (300 MHz,  $\text{CDCl}_3$ , ppm):  $\delta$  1.00 (d,  $J = 6.5$  Hz, 6H), 1.41 (s, 9H), 2.08 (m, 1H), 4.16 (d,  $J = 6.5$  Hz, 2H), 8.09 (s, 1H).  $^{13}\text{C-NMR}$  (75 MHz,  $\text{CDCl}_3$ , ppm):  $\delta$  19.1, 27.4, 27.9, 74.0, 83.6, 135.1, 136.0, 136.8, 149.9, 155.4. HR-MS: Calculated mass: 445.1212 Mass found: 445.1246.

**di-tert-Butyl [3-(benzyloxy)-5-bromopyrazin-2-yl]imidodicarbonate (2c)**

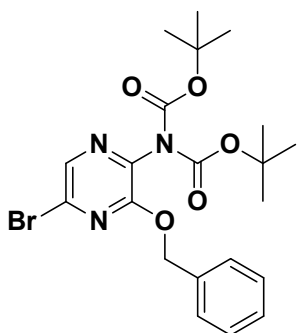

Prepared using **procedure C**, purified using MPLC (8/2 heptanes/EtOAc), **2c** was obtained as orange crystals (66%).  $R_f = 0.16$ . Melting point: 69-72 °C.  $^1\text{H-NMR}$  (300 MHz,  $\text{CDCl}_3$ , ppm):  $\delta$  1.35 (18H), 5.45 (2H), 7.36 (5H), 8.13 (1H).  $^{13}\text{C-NMR}$  (75 MHz,  $\text{CDCl}_3$ , ppm):  $\delta$  27.8, 69.3, 83.7, 128.3, 128.4, 134.8, 135.3, 136.5, 136.9, 149.9, 154.7. HR-MS: Calculated mass: 502.0949 Mass found: 502.0949.



## di-tert-Butyl (5-bromo-3-isopropoxy-pyrazin-2-yl)imidodicarbonate (2d)

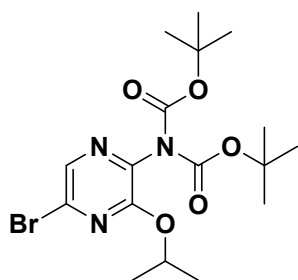

Prepared using **procedure C** (but 4 eq. of  $\text{Boc}_2\text{O}$ ), purified using MPLC (8/2 heptanes/EtOAc), **2d** was obtained as yellow crystals (79%).  $R_f = 0.18$ . Melting point: 81-83 °C.  $^1\text{H-NMR}$  (300 MHz,  $\text{CDCl}_3$ , ppm):  $\delta$  1.35 (d,  $J = 6$  Hz, 6H), 1.41 (s, 15H), 5.28-5.46 (m, 1H), 8.07 (s, 1H).  $^{13}\text{C-NMR}$  (75 MHz,  $\text{CDCl}_3$ , ppm):  $\delta$  21.7, 27.9, 71.3, 83.4, 134.9, 135.7, 137.0, 149.8, 154.7. HR-MS: Calculated mass: 454.0949 Mass found: 454.0939 [M+Na].

## General procedures for carbonylative coupling

### **Procedure D:** *Alkoxy-carbonylation of monomers.*

All solid reagents ( $\text{Pd}(\text{OAc})_2$  (5 mol%), the monomer (1 eq.) and Xantphos (10 mol%) were brought into an oven-dried 2-necked flask with a septum, under an atmosphere of argon. The flask was evacuated and backfilled with argon, this was repeated 2 times. Methanol (10 eq.) and triethylamine (0.2 M) were added with a syringe via the septum. The resulting mixture was purged with carbon monoxide for 2 minutes (**Caution!** Carbon monoxide is a highly toxic and flammable gas). The reaction was then placed under a carbon monoxide atmosphere by means of a balloon and heated to 80 °C in an oil bath for 24 hours. After this time, the mixture was cooled, diluted with EtOAc and filtered over Celite®. The resulting filtrate was evaporated *in vacuo* to obtain the crude product. Purification was carried out by MPLC.

### **Procedure E:** *General procedure for CO precursor two-chamber system*

Chamber A of a flame-dried two-chamber reactor (Figure ) was filled with 1 mg palladium(II) acetate (0.005 mmol, 1 mol%), 3 mg Xantphos (0.005 mmol, 1 mol%) and 159 mg sodium carbonate (1.50 mmol, 3 eq.). The reactor was brought under argon atmosphere by two consecutive vacuum-argon cycles. Next, chamber B was filled with 2 mL dry degassed toluene, 51  $\mu\text{L}$  mesyl chloride (0.65 mmol, 1.3 eq.) and 25  $\mu\text{L}$  formic acid (0.65 mmol, 1.3 eq.). In chamber A, 1 mL dry degassed toluene was added, followed by 0.50 mmol aryl bromide (1 eq.) and 0.75 mmol amine/alcohol (1.1 eq.). Then the reactor was placed in an oil-

bath at 100 °C. Finally, 181  $\mu\text{L}$  triethylamine (1.30 mmol, 2.6 eq.) was added by injection through the septum in chamber B and instant gas formation was observed.

*[Remark: when the aryl bromide and/or amine are solids at room temperature, they were added to Chamber A after the addition of palladium(II) acetate and Xantphos.]*

After 2 to 24 hours, the reactor was brought to room temperature and the residual pressure was released carefully by removing one of the caps. As carbon monoxide is a highly toxic gas, the reaction was stirred at room temperature for 15 minutes to ensure that all carbon monoxide gas was extracted out of the fume hood. Next, the content of chamber A was transferred to a 100 mL round-bottomed flask. Chamber A was rinsed five times with 2 mL of EtOAc and these fractions were added to the same flask. After the addition of 1 g Celite®, the solvent was removed under reduced pressure. For purification, the crude product was dry-loaded onto the MPLC system.

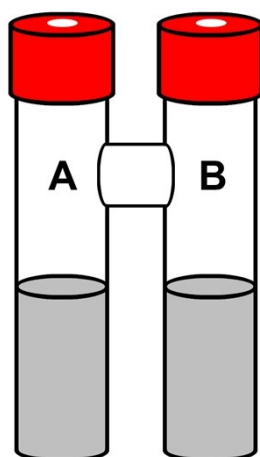

Figure 1. Representation of the two-chamber reactor. Inner volume = 20 mL.

#### **Procedure F:** Aminocarbonylative coupling of monomers

All solid reagents: monomer A (1 eq.), monomer B (1 eq.), Pd(OAc)<sub>2</sub> (5 mol%), Na<sub>2</sub>CO<sub>3</sub> (3 eq.) and Xantphos (5 mol%) were brought in a dry two-necked flask with a cooler and a septum, under an atmosphere of argon. The flask was evacuated and subsequently purged with argon. This was repeated 2 times. Dry degassed toluene (0.2 M) was added via a syringe. The mixture was purged with carbon monoxide for 2 minutes via a needle through the septum. (**Caution!** Carbon monoxide is a highly toxic and flammable gas). Then a carbon monoxide atmosphere was created by means of a balloon. The mixture was stirred at 80 °C, for 24 hours. Afterwards, the reaction was cooled to room temperature, diluted with EtOAc and filtered over a plug of Celite®. The filtrate was evaporated to afford the crude product which was purified by MPLC.

### Methyl 5-[bis(*tert*-butoxycarbonyl)amino]-6-methoxypyrazine-2-carboxylate (**3a**)

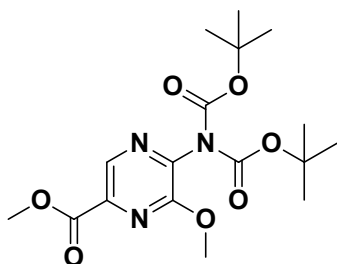

Using **Procedure D**, after purification by MPLC (8/2 heptanes/EtOAc), the product was obtained as white crystals (88%).  $R_f = 0.18$ . Melting point: 99-102 °C.  $^1\text{H-NMR}$  (300 MHz,  $\text{CDCl}_3$ , ppm):  $\delta$  1.40 (s, 18H), 4.05 (s, 3H), 4.10 (s, 3H), 8.55 (s, 1H).  $^{13}\text{C-NMR}$  (75 MHz,  $\text{CDCl}_3$ , ppm):  $\delta$  52.9, 54.5, 75.5, 83.7, 136.6, 139.0, 141.4, 149.6, 155.4, 164.2. FT-IR ( $\text{cm}^{-1}$ ): 1742, 1705 (carbamate). HR-MS: Calculated mass: 283.1180 Mass found: 283.1182 [M – Boc].

### Methyl 5-[bis(*tert*-butoxycarbonyl)amino]-6-isobutoxypyrazine-2-carboxylate (**3b**)

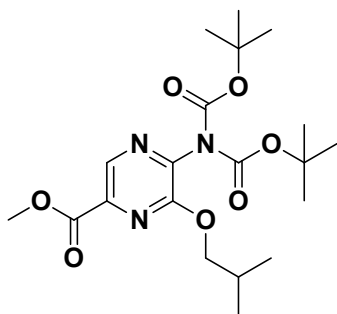

Using **Procedure D**, after purification by MPLC (8/2 heptanes/EtOAc), the product was obtained as a white solid (89%).  $R_f = 0.25$ . Melting point 59-62 °C.  $^1\text{H-NMR}$  (300 MHz,  $\text{CDCl}_3$ , ppm):  $\delta$  1.01 (d,  $J = 6.8$  Hz, 6H), 1.39 (s, 18H), 2.10 (m, 1H), 4.00 (s, 3H), 4.26 (d,  $J = 6$  Hz, 2H), 8.71 (s, 1H).  $^{13}\text{C-NMR}$  (75 MHz,  $\text{CDCl}_3$ , ppm):  $\delta$  19.1, 27.8, 27.9, 52.9, 73.5, 83.7, 136.3, 139.1, 141.3, 149.6, 155.6, 164.2. HR-MS: Calculated mass: 425.2162 Mass found: 425.2125.

### Methyl 5-amino-6-methoxypyrazine-2-carboxylate (**4a**)

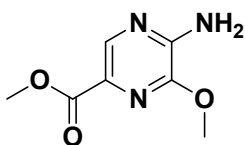

Methyl 5-[bis(*tert*-butoxycarbonyl)amino]-6-methoxypyrazine-2-carboxylate (**3a**) (800 mg, 2.1 mmol) was dissolved in 10 mL of dry DCM and the solution was cooled in an ice bath. To

this TFA (3.2 mL, 41.7 mmol) was added dropwise while stirring. After the addition of TFA, the reaction was stirred at RT for 6 hours. Afterwards, the solvent was evaporated *in vacuo*. The residue was purified using MPLC (7/3 EtOAc/heptanes) to obtain the pure product as off-white crystals (350 mg, 92%).  $R_f = 0,10$ . Melting point: 87-88 °C.  $^1\text{H-NMR}$  (300 MHz,  $\text{CDCl}_3$ , ppm):  $\delta$  3.93 (s, 3H), 4.11 (s, 3H), 5.81 (bs, 2H), 8.35 (s, 1H).  $^{13}\text{C-NMR}$  (75 MHz,  $\text{CDCl}_3$ , ppm):  $\delta$  52.2, 54.0, 128.6, 138.1, 147.3, 147.8, 165.3. FT-IR ( $\text{cm}^{-1}$ ): 3338, 3111, 2953, 2876, 1715, 1551, 1447. HR-MS: Calculated mass: 183.0644 Mass found: 183.0650.

#### Methyl 5-amino-6-isobutoxypyrazine-2-carboxylate (**4b**)

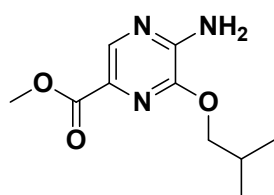

In a sealed vessel under an argon atmosphere, methyl 5-[bis(*tert*-butoxycarbonyl)amino]-6-isobutoxypyrazine-2-carboxylate (**3b**) (220 mg, 0.517 mmol) was suspended in 15 mL of water. The mixture was stirred vigorously while heating to 100 °C for 24 hours. The suspension was then allowed to cool to RT and extracted three times with EtOAc. The combined organic phases were washed with water, brine and dried over  $\text{MgSO}_4$ . After filtration, the filtrate was evaporated *in vacuo* to give the pure product (**4b**) as white crystals (90 mg, 77%).  $R_f = 0.11$  (heptanes/EtOAc 7:3). Melting point: 115-117 °C.  $^1\text{H-NMR}$  (300 MHz,  $\text{CDCl}_3$ , ppm):  $\delta$  1.04 (d,  $J = 6.6$  Hz), 2.13 (m, 1H), 3.92 (s, 3H), 4.25 (d,  $J = 6.6$  Hz, 2H), 5.33 (bs, 2H), 8.37 (s, 1H).  $^{13}\text{C-NMR}$  (75 MHz,  $\text{CDCl}_3$ , ppm):  $\delta$  19.3, 27.9, 29.7, 52.2, 72.9, 128.6, 137.9, 147.2, 147.8, 165.3. HR-MS: Calculated mass: 226.11860 Mass found: 226.1201.

#### Methyl 5-[[[(5-[bis(*tert*-butoxycarbonyl)amino]-6-methoxypyrazin-2-yl)11-carbonyl]amino]-6-methoxypyrazine-2-carboxylate (**5a**)

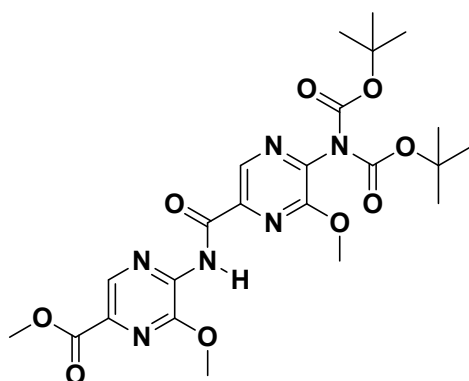

Using **procedure F**, after purification using MPLC (1/1 heptanes/EtOAc), **5a** was obtained as white crystals (60%).  $R_f = 0.16$ . Melting point: 242 °C (decomposition).  $^1\text{H-NMR}$  (300 MHz,  $\text{CDCl}_3$ , ppm):  $\delta$  2.17 (s, 18H), 3.99 (s, 3H), 4.17 (s, 3H), 4.21 (s, 3H), 8.81 (s, 1H), 8.98 (s, 1H), 10.53 (s, 1H).  $^{13}\text{C-NMR}$  (75 MHz,  $\text{CDCl}_3$ , ppm):  $\delta$  27.8, 52.7, 54.2, 55.0, 84.0, 134.0, 135.4, 137.6, 139.1, 140.3, 142.1, 149.1, 149.7, 154.2, 159.7, 164.3. HR-MS: Calculated mass: 534.2074 Mass found: 534.2103.

**Methyl 5-(((5-[bis(*tert*-butoxycarbonyl)amino]-6-isobutoxypyrazin-2-yl)carbonyl)amino)-6-isobutoxypyrazine-2-carboxylate (**5b**)**

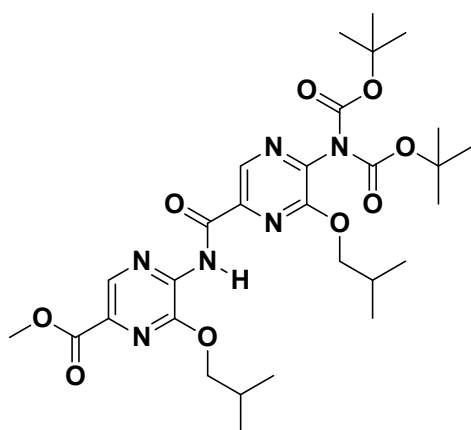

Using **procedure F**, after purification using MPLC (1/1 heptanes/EtOAc), **5b** was obtained as a yellow oil (59%).  $R_f = 0.37$ .  $^1\text{H-NMR}$  (300 MHz,  $\text{CDCl}_3$ , ppm):  $\delta$  1.07 (d,  $J = 7$  Hz, 6H), 1.10 (d,  $J = 7$ Hz, 6H), 1.43 (s, 18H), 2.18 (bm, 2H), 3.99 (s, 3H), 4.25 (d,  $J = 6.4$  Hz, 2H), 4.37 (d,  $J = 6.4$  Hz, 2H), 8.80 (s, 1H), 8.98 (s, 1H), 10.39 (s, 1H).  $^{13}\text{C-NMR}$  (75 MHz,  $\text{CDCl}_3$ , ppm):  $\delta$  19.2, 19.4, 21.1, 28.1, 52.7, 73.5, 73.9, 83.9, 134.0, 135.4, 137.3, 139.4, 140.3, 142.2, 148.9, 149.8, 154.5, 159.9, 164.4. HR-MS: Calculated mass: 618.3013, Mass found: 618.3000.

**Methyl-[(5-{bis[(*tert*-butoxy)carbonyl]amino}-6-(2-methylpropoxy)pyrazin-2-yl)amino]-6-(2-methylpropoxy)pyrazine-2-carboxylate (**5b'**, Buchwald-Hartwig amination product)**

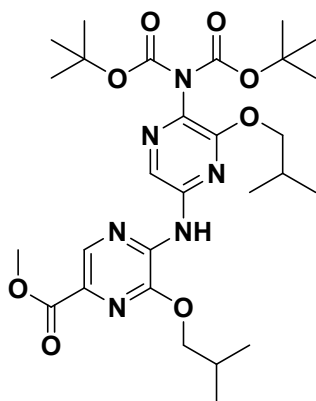

Using **procedure F**, after purification using MPLC (1/1 heptanes/EtOAc), **5b'** was obtained as off-white crystals (59%). Melting point: 130-133 °C. <sup>1</sup>H-NMR (300 MHz, CDCl<sub>3</sub>, ppm): δ 9.28 (s, 1H), 8.60 (s, 1H), 7.82 (s, 1H), 4.36 (d, *J* = 6.7 Hz, 2H), 4.12 (d, *J* = 6.5 Hz, 2H), 3.95 (s, 3H), 2.32 – 2.16 (m, 1H), 2.15 – 2.00 (m, *J* = 13.3, 6.7 Hz, 1H), 1.40 (s, 18H), 1.09 (d, *J* = 6.7 Hz, 6H), 1.01 (d, *J* = 6.7 Hz, 6H). <sup>13</sup>C-NMR (101 MHz, CDCl<sub>3</sub>, ppm): δ 165.1, 154.3, 150.6, 147.5, 145.1, 142.3, 137.1, 132.6, 130.6, 123.8, 83.0, 73.7, 73.1, 52.5, 28.1, 28.0, 19.4, 19.3. HR-MS: Calculated mass: 591.3137 Mass found: 591.3120 [M+H]

**Methyl 5-[[[(5-amino-6-methoxypyrazin-2-yl)carbonyl]amino]-6-methoxypyrazine-2-carboxylate (6a)**

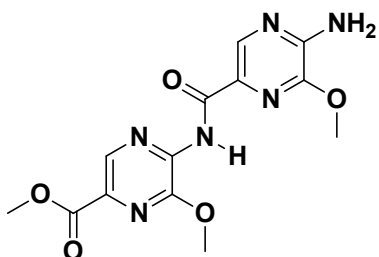

Methyl 5-[[[(5-[bis(*tert*-butoxycarbonyl)amino]-6-isobutoxypyrazin-2-yl)carbonyl) amino]-6-isobutoxypyrazine-2-carboxylate (**5a**) (200 mg, 0.374 mmol) was dissolved in 20 mL of DCM under an atmosphere of argon. The solution was cooled to 0 °C in an ice bath and TFA (0.577 mL, 7.48 mmol) was slowly added while stirring. The reaction mixture was then stirred at RT for 4 hours. Afterwards, the solvent was evaporated *in vacuo* to give a white-yellow powder, which was washed with water, MeOH, heptane, EtOAc and DCM to afford **6b** as an off-white powder (125 mg, quant.). Melting point: 290 °C (decomposition). Due to the poor solubility of this product in all solvents tried, analytical data are not available.

**Methyl 5-[5-amino-6-(2-methylpropoxy)pyrazine-2-amido]-6-(2-methylpropoxy)pyrazine-2-carboxylate (6b)**

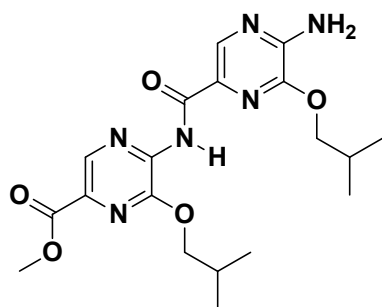

In a sealed vessel under an argon atmosphere, methyl 5-[[5-[bis(*tert*-butoxycarbonyl)amino]-6-isobutoxypyrazin-2-yl]carbonyl] amino]-6-isobutoxypyrazine-2-carboxylate (**5b**) (115 mg, 0.186 mmol) was suspended in 7 mL of water. The mixture was stirred vigorously while heating to 100 °C for 72 hours. The suspension was then allowed to cool to RT and extracted three times with EtOAc. The combined organic phases were washed with water, brine and dried over MgSO<sub>4</sub>. After filtration, the filtrate was evaporated *in vacuo* to give the pure product as white crystals (72 mg, 92%). R<sub>f</sub> = 0.31 (heptanes/EtOAc 2:8). Melting point: 196-198 °C. <sup>1</sup>H-NMR (300 MHz, CDCl<sub>3</sub>, ppm): δ 1.095 (d, J = 6.8 Hz, 6H), 1.10 (d, J = 6.8 Hz, 6H), 2.19 (m, 2H), 3.97 (s, 3H), 4.23 (d, J = 6 Hz, 2H), 4.35 (d, J = 6Hz, 2H), 5.60 (bs, 2H), 8.59 (s, 1H), 8.77 (s, 1H). <sup>13</sup>C-NMR (75 MHz, CDCl<sub>3</sub>, ppm): δ 19.3, 19.5, 28.0, 28.1, 52.6, 72.9, 73.7, 129.5, 133.0, 136.8, 137.4, 141.0, 146.0, 148.4, 148.8, 161.3, 164.9. HR-MS: Calculated mass: 418.1965 Mass found: 418.1971.

**Methyl 5-[[[(5-[[[(5-[bis(*tert*-butoxycarbonyl)amino]-6-methoxypyrazin-2-yl)carbonyl)amino]-6-methoxypyrazin-2-yl)carbonyl)amino]-6-methoxypyrazine-2-carboxylate (7a)**

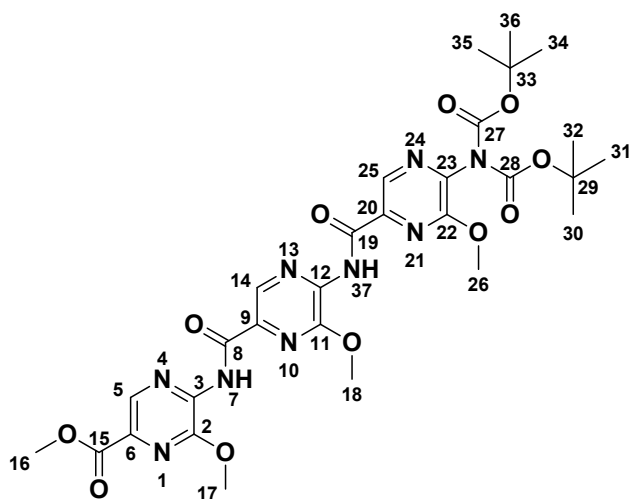

Using **procedure F**, after purification using MPLC (9/1 EtOAc/heptanes), **7a** was obtained as a white solid (17%).  $R_f = 0.23$ . Peak assignments of the  $^{13}\text{C}$  and  $^1\text{H}$  NMR spectra were confirmed using 2D NMR experiments.  $^1\text{H}$ -NMR (300 MHz,  $\text{CDCl}_3$ , ppm):  $\delta$  1.44 (s, 18H,  $\text{H}^{30-32, 34-37}$ ), 3.99 (s, 3H,  $\text{H}^{16}$ ), 4.18 (s, 3H,  $\text{H}^{26}$ ), 4.21 (s, 3H,  $\text{H}^{18}$ ), 4.27 (s, 3H,  $\text{H}^{17}$ ), 8.81 (s, 1H,  $\text{H}^{14}$ ), 9.00 (s, 1H,  $\text{H}^{25}$ ), 9.04 (s, 1H,  $\text{H}^5$ ), 10.40 (s, 1H,  $\text{H}^7$ ), 10.50 (s, 1H,  $\text{H}^{37}$ ).  $^{13}\text{C}$ -NMR (75 MHz,  $\text{CDCl}_3$ , ppm):  $\delta$  27.9 ( $\text{C}^{30-32, 34-36}$ ), 52.7 ( $\text{C}^{15}$ ), 54.2 ( $\text{C}^{18}$ ), 54.7 ( $\text{C}^{17}$ ), 55.0 ( $\text{C}^{26}$ ), 84.1 ( $\text{C}^{29,33}$ ), 133.8 ( $\text{C}^9$ ), 134.5 ( $\text{C}^6$ ), 135.5 ( $\text{C}^5$ ), 136.3 ( $\text{C}^{25}$ ), 137.6 ( $\text{C}^{14}$ ), 139.0 ( $\text{C}^{20}$ ), 140.5 ( $\text{C}^{12}$ ), 140.9 ( $\text{C}^3$ ), 142.2 ( $\text{C}^{23}$ ), 148.0 ( $\text{C}^2$ ), 149.0 ( $\text{C}^{11}$ ), 149.7 ( $\text{C}^{27,28}$ ), 154.2 ( $\text{C}^{22}$ ), 159.5 ( $\text{C}^8$ ), 159.8 ( $\text{C}^{19}$ ), 164.3 ( $\text{C}^{15}$ ). HR-MS: Calculated mass: 483.1266 Mass found: 483.1278 [M-2Boc].



**Methyl 5-[[[(5-[[[(5-[bis(*tert*-butoxycarbonyl)amino]-6-isobutoxypyrazin-2-yl)carbonyl)amino]-6-isobutoxypyrazin-2-yl)carbonyl)amino]-6-isobutoxypyrazine-2-carboxylate (7b)**

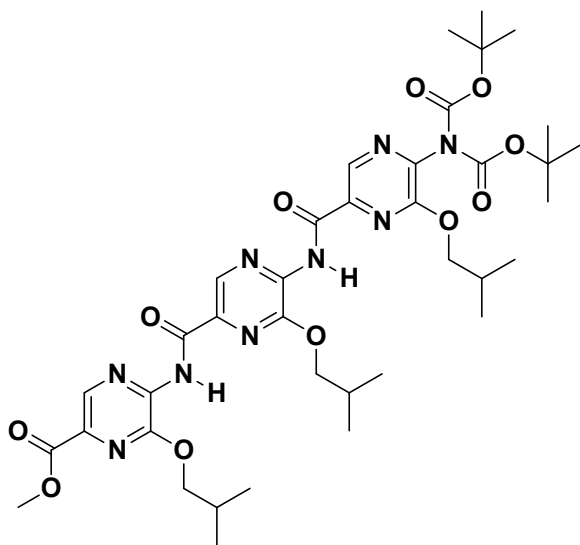

Using **procedure F**, after purification using MPLC (8/2 EtOAc/heptanes), **7b** was obtained as an off-white wax (19%).  $R_f = 0.4$ .  $^1\text{H-NMR}$  (300 MHz,  $\text{CDCl}_3$ , ppm):  $\delta$  1.08, 1.11, 1.16, 1.44, 2.19, 3.99, 4.26, 4.35, 4.37, 8.79, 9.00, 9.06, 10.26, 10.37.  $^{13}\text{C-NMR}$  (75 MHz,  $\text{CDCl}_3$ , ppm):  $\delta$  19.2, 19.48, 19.50, 27.9, 28.06, 28.09, 28.2, 52.7, 73.5, 73.8, 84.0, 133.8, 134.6, 135.5, 136.3, 137.4, 139.3, 140.5, 141.0, 142.3, 147.9, 148.9, 149.8, 154.5, 159.8, 160.0, 164.4.

**Methyl-[5-(5-{bis[(tert-butoxy)carbonyl]amino}12-6-methoxypyrazine-2-amido)-6-(2-methylpropoxy)pyrazine-2-amido]-6-(2-methylpropoxy)pyrazine-2-carboxylate (7c)**

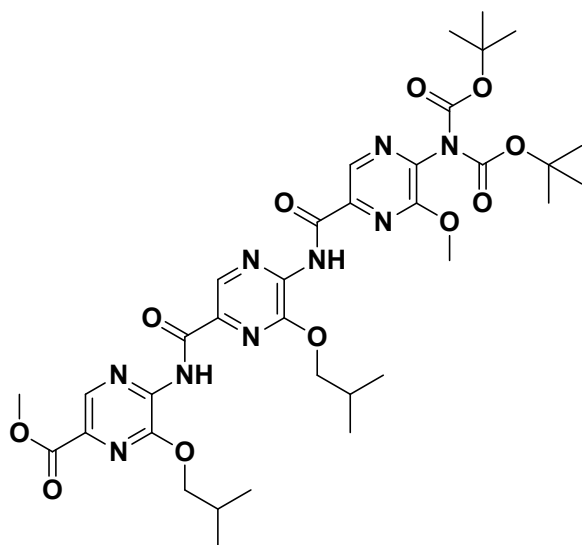

Using **procedure F**, after purification using MPLC (98/2 DCM/MeOH), **7c** was obtained as a yellow solid (23%).  $R_f = 0.35$ . Melting point: 215-219 °C.  $^1\text{H}$  NMR (400 MHz,  $\text{CDCl}_3$ )  $\delta$  1.10 (d,  $J = 6.6$  Hz, 6H), 1.15 (d,  $J = 6.6$  Hz, 6H), 1.44 (s, 18H), 3.98 (s, 3H), 4.14 (s, 3H), 4.40 – 4.32 (m, 4H), 8.78 (s, 1H), 9.01 (s, 1H), 9.05 (s, 1H), 10.25 (s, 1H), 10.43 (s, 1H).  $^{13}\text{C}$  NMR (101 MHz,  $\text{CDCl}_3$ )  $\delta$  19.4, 19.5, 27.9, 28.1, 28.2, 52.7, 54.2, 73.7, 73.8, 84.1, 133.8, 134.7, 135.8, 136.4, 137.4, 139.1, 140.5, 141.0, 142.3, 147.9, 148.9, 149.8, 154.3, 159.6, 160.0, 164.4. HR-MS: Calculated mass: 770.3468 Mass found: 770.3480 [M+H].

**Methyl-{5-[6-(benzyloxy)-5-{bis[(tert-butoxy)carbonyl]amino}pyrazine-2-amido]-6-(2-methylpropoxy)pyrazine-2-amido}-6-(2-methylpropoxy)pyrazine-2-carboxylate (7d)**

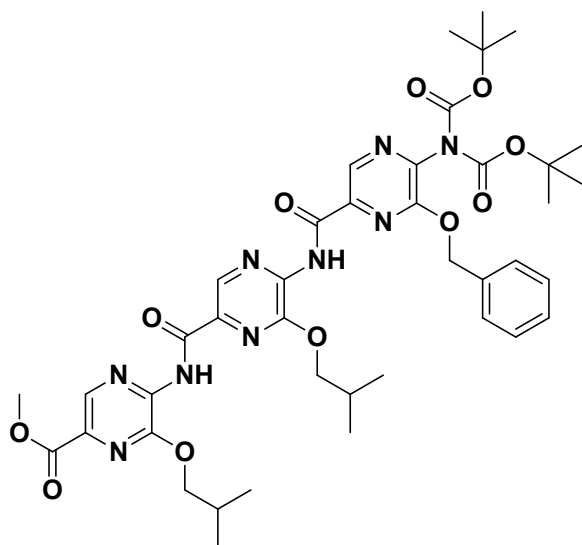

Using **procedure F**, after purification using MPLC (98/2 DCM/MeOH), **7d** was obtained as a yellow solid (24%).  $R_f = 0.33$ .  $^1\text{H NMR}$  (400 MHz,  $\text{CDCl}_3$ )  $\delta$  1.11 – 1.06 (m,  $J = 6.7, 2.4$  Hz, 11H), 1.38 (s, 15H), 2.25 – 2.11 (m,  $J = 13.3, 6.6$  Hz, 3H), 3.98 (s, 3H), 4.40 – 4.28 (m,  $J = 10.5, 6.6$  Hz, 4H), 5.54 (s, 2H), 7.45 – 7.38 (m,  $J = 5.2, 3.6$  Hz, 5H), 8.79 (s, 1H), 9.04 (s, 1H), 9.07 (s, 1H), 10.25 (s, 1H), 10.45 – 10.41 (m, 1H).  $^{13}\text{C NMR}$  (101 MHz,  $\text{CDCl}_3$ )  $\delta$  19.4, 19.5, 27.8, 28.1, 28.2, 52.7, 69.1, 73.8, 73.8, 84.1, 128.1, 128.8, 128.9, 133.8, 134.7, 135.9, 136.4, 137.4, 139.1, 140.5, 141.0, 142.3, 147.9, 148.9, 149.8, 153.9, 159.6, 160.0, 164.4. HR-MS: Calculated mass: 846.3781 Mass Found: 846.3801 [M+H].

**Methyl-5-[5-(5-amino-6-methoxypyrazine-2-amido)-6-(2-methylpropoxy)pyrazine-2-amido]-6-(2-methylpropoxy)pyrazine-2-carboxylate (8a)**

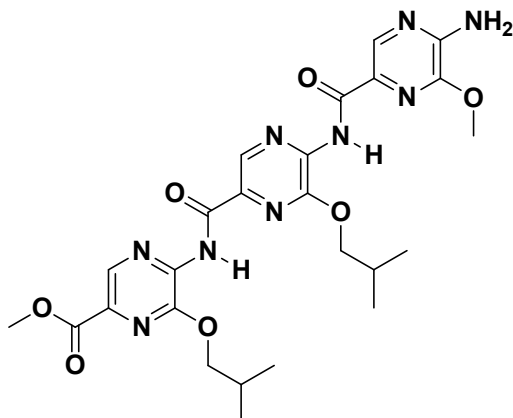

**7c** was dissolved in dry DCM (0.2 M) and the solution was cooled in an ice bath. Subsequently, TFA (20 eq.) was added dropwise while stirring. After the addition of TFA, the reaction was stirred at RT for 6 hours. Afterwards, the solvent was evaporated *in vacuo* to obtain the pure product as a yellow solid (98%). <sup>1</sup>H-NMR (400 MHz, CDCl<sub>3</sub>) δ 10.31 (s, 1H), 10.26 (s, 1H), 9.03 (s, 1H), 8.79 (s, 1H), 8.63 (s, 1H), 5.38 (s, 2H), 4.36 (d, J = 6.7 Hz, 2H), 4.32 (d, J = 6.5 Hz, 3H), 4.13 (s, 3H), 3.98 (s, 3H), 2.26 – 2.16 (m, 3H), 1.15 (d, J = 6.7 Hz, 6H), 1.10 (d, J = 6.7 Hz, 7H). FT-IR (cm<sup>-1</sup>): 3499 (-NH<sub>2</sub>), 3338, 2919, 1719. HR-MS: Calculated mass: 570.2419 Mass found: 570.2416 [M+H].

**Methyl-5-{5-[5-amino-6-(benzyloxy)pyrazine-2-amido]-6-(2-methylpropoxy)pyrazine-2-amido}-6-(2-methylpropoxy)pyrazine-2-carboxylate (8b)**

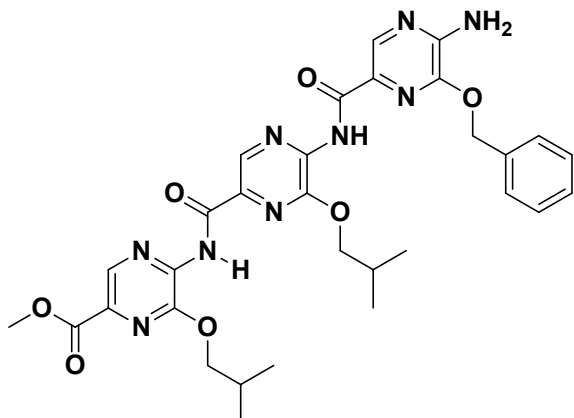

**7d** was dissolved in dry DCM (0.2 M) and the solution was cooled in an ice bath. Subsequently, TFA (20 eq.) was added dropwise while stirring. After the addition of TFA, the reaction was stirred at RT for 6 hours. Afterwards, the solvent was evaporated *in vacuo* to obtain the pure product as a yellow solid (quant.). Melting point: 244-246 °C. <sup>1</sup>H NMR (400 MHz, CDCl<sub>3</sub>) δ 1.13 – 1.04 (m, *J* = 6.7, 1.9 Hz, 12H), 2.27 – 2.09 (m, 2H), 3.97 (d, *J* = 2.3 Hz, 3H), 4.39 – 4.28 (m, 4H), 5.48 (s, 4H), 7.51 – 7.43 (m, 5H), 8.65 (s, 1H), 8.78 (s, 1H), 9.03 (s, 1H), 10.26 (s, 1H), 10.34 (s, 1H). <sup>13</sup>C NMR (101 MHz, CDCl<sub>3</sub>) δ 19.5, 19.6, 28.2, 28.3, 52.8, 69.0, 73.8, 73.9, 128.7, 129.1, 129.2, 133.8, 133.9, 135.2, 136.6, 137.5, 137.6, 137.6, 140.8, 141.8, 145.7, 147.8, 148.5, 149.0, 160.4, 161.0, 164.6. HR-MS: Calculated mass: 846.3781 Mass found: 846.3801 [M+H].

**3-methoxy-5-(3-methoxyphenyl)pyrazin-2-amine (9)**

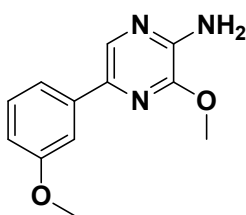

5-bromo-3-methoxypyrazin-2-amine (**1a**) (246 mg; 1.21 mmol), (2-methoxyphenyl)boronic acid, (220 mg; 1.45 mmol), SPhos (4 mol%), Pd(OAc)<sub>2</sub> (2 mol%) and K<sub>2</sub>CO<sub>3</sub> (500 mg; 3.62 mmol) were brought in a dry two-necked flask with a cooler and a septum, under an atmosphere of argon. The flask was evacuated and subsequently purged with argon. This was repeated two times. A degassed mixture of ACN/water (3/2; 6.5 mL; 0.2 M) was added via a syringe. The mixture was stirred at 100 °C, for 24 hours. Afterwards, the reaction was cooled to RT, diluted with EtOAc and filtered over a plug of Celite®. The filtrate was dried over

MgSO<sub>4</sub>, filtered and evaporated *in vacuo*. The reaction mixture was purified using MPLC (75/25 heptanes/EtOAc) to give 3-methoxy-5-(3-methoxyphenyl)pyrazin-2-amine (**9**) as a white solid (203 mg, 73%). R<sub>f</sub> = 0.13. Melting point: 92-94 °C. <sup>1</sup>H-NMR (300 MHz, CDCl<sub>3</sub>, ppm): δ 3.87 (s, 3H), 4.08 (s, 3H), 4.95 (s, 2H), 6.87 (m, 1H), 7.33 (m, 1H), 7.48 (m, 2H), 8.03 (s, 1H). <sup>13</sup>C-NMR (75 MHz, CDCl<sub>3</sub>, ppm): δ 53.4, 55.3, 111.3, 112.9, 117.8, 129.7, 130.0, 138.0, 138.7, 144.4, 147.7, 156.0. HR-MS: Calculated mass: 231.1008 Mass found: 231.1007.

**di-tert-butyl [3-(benzyloxy)-5-([3-methoxy-5-(3-methoxyphenyl)pyrazin-2-yl]amino)carbonyl]pyrazin-2-yl]imidodicarbonate**

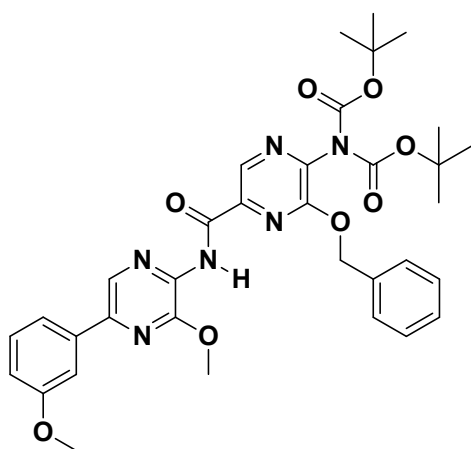

Using **procedure F**, after purification using MPLC (1/1 heptanes/EtOAc), the product was obtained as white crystals (21%). R<sub>f</sub> = 0.34. Melting point: 101-103 °C. <sup>1</sup>H-NMR (300 MHz, CDCl<sub>3</sub>, ppm): δ 1.37, 3.90, 4.20, 5.62, 7.37, 7.39, 7.42, 7.50, 7.58, 8.54, 8.98, 10.19. <sup>13</sup>C-NMR (75 MHz, CDCl<sub>3</sub>, ppm): δ 27.8, 54.2, 55.4, 68.9, 83.9, 112.4, 114.4, 118.8, 127.9, 128.6, 128.7, 130.0, 131.2, 135.3, 135.4, 136.0, 137.4, 139.6, 141.7, 144.1, 149.4, 149.7, 153.6, 160.1. HR-MS: Calculated mass: 659.2824 Mass found: 659.2829.

**Methyl 5-([5-amino-6-(benzyloxy)pyrazin-2-yl]carbonyl]amino)-6-methoxypyrazine-2-carboxylate (**10**)**

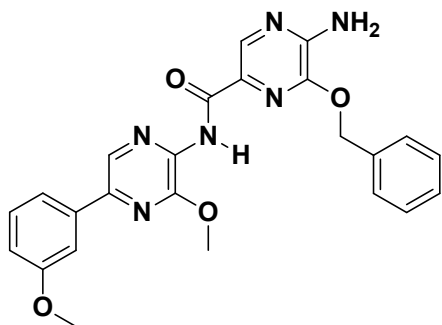

di-*tert*-butyl [3-(benzyloxy)-5-([3-methoxy-5-(3-methoxyphenyl)pyrazine-2-yl]amino)carbonyl]pyrazin-2-yl]imidodicarbonate (65 mg, 0.01 mmol) was dissolved in 8 mL of DCM under an atmosphere of argon. The solution was cooled to 0 °C in an ice bath and TFA (0.15 mL, 1.97 mmol) was slowly added while stirring. The reaction mixture was then stirred at RT for 4 hours. Afterwards, the solvent was evaporated to give a white-yellow powder, which was dissolved in EtOAc and extracted with NaHCO<sub>3</sub>. The organic phase was evaporated *in vacuo* to give **10** as a yellow powder (45 mg, quant.). Melting point: 240-243 °C. <sup>1</sup>H-NMR (300 MHz, CDCl<sub>3</sub>, ppm): δ 3.89, 4.17, 5.40, 5.55, 6.94, 6.95, 6.97, 6.98, 7.37, 7.40, 7.42, 7.42, 7.44, 7.53, 7.53, 7.55, 7.56, 7.57, 7.58, 7.59, 8.51, 8.60, 10. <sup>13</sup>C-NMR (75 MHz, CDCl<sub>3</sub>, ppm): δ 54.1, 55.4, 68.6, 112.2, 114.1, 118.7, 128.5, 128.77, 128.82, 129.8, 129.9, 131.1, 135.6, 136.5, 136.8, 137.7, 143.1, 145.3, 148.0, 149.2, 160.1, 161.0. HR-MS: Calculated mass: 459.1775 Mass found: 459.1772.

### 5-bromo-2-nitrophenol (**12**)

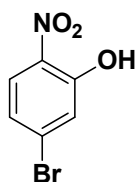

KOtBu (5.54 g, 49.40 mmol) was added to 20 mL of NH<sub>3(l)</sub> under an argon atmosphere while stirring. A solution of cumene hydroperoxide (1.56 mL, 10.86 mmol) and 1-bromo-4-nitrobenzene (2 g, 9.90 mmol) in 7 mL of dry THF was then added dropwise. The reaction mixture was refluxed at -33 °C for 30 minutes, after which the reaction was quenched by first slowly adding solid NH<sub>4</sub>Cl, followed by sat. aqueous NH<sub>4</sub>Cl. Aqueous HCl (1 M) was then added until an acidic pH was observed on a pH indicator strip. The mixture was subsequently extracted with EtOAc (3x50 mL), dried and evaporated *in vacuo*. Purification was performed using MPLC (9/1 heptanes/EtOAc) to give **12** as bright yellow crystals (1.23 g, 57%). R<sub>f</sub> = 0.42. Melting point: 28-29 °C. <sup>1</sup>H-NMR (300 MHz, CDCl<sub>3</sub>, ppm): δ 7.14 (dd, J = 2.9Hz, 1H), 7.38 (d, J = 2Hz, 1H), 7.98 (d, J = 9Hz, 1H), 10.63 (s, 1H). <sup>13</sup>C-NMR (75 MHz, CDCl<sub>3</sub>, ppm): δ 123.0, 123.9, 126.1, 132.3, 132.7, 155.3. FT-IR (cm<sup>-1</sup>): 1521, 1310 (s, -NO<sub>2</sub>). HR-MS: Calculated mass: 215.9302 Mass found: 215.9294.

### 4-bromo-2-[(4-fluorobenzyl)oxy]-1-nitrobenzene (**13**)

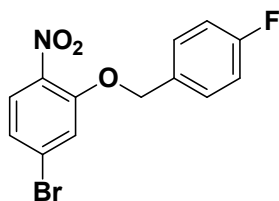

5-Bromo-2-nitrophenol (**12**) (500 mg, 2.29 mmol), *p*-fluorobenzylalcohol (318 mg, 2.52 mmol) and PPh<sub>3</sub> (902 mg, 3.44 mmol) were dissolved in 4 mL of dry THF under an argon atmosphere. The solution was then cooled to 0 °C and DIAD (696 mg, 3.44 mmol) was slowly added while keeping the temperature at 0 °C. Afterwards the reaction mixture was allowed to warm to RT and stirred for an additional 18 hours. Then the solvent was evaporated and the residue was redissolved in EtOAc and filtered over silica gel. The filtrate was once again evaporated *in vacuo* to deliver the crude product. Purification was performed using MPLC (9/1 heptanes/EtOAc) to give product **13** as a yellow solid (462 mg, 62%). R<sub>f</sub> = 0.25. Melting point: 80-82 °C. <sup>1</sup>H-NMR (300 MHz, CDCl<sub>3</sub>, ppm): δ 5.18 (s, 2H), 7.10 (t, *J* = 8.7 Hz, 2H), 7.21 (dd, *J* = 8.6, 1.9 Hz, 1H), 7.29 (d, *J* = 1.9 Hz, 1H), 7.44 (dd, *J* = 8.8, 5.3 Hz, 2H), 7.78 (d, *J* = 8.6 Hz, 1H). <sup>13</sup>C-NMR (75 MHz, CDCl<sub>3</sub>, ppm): δ 71.0 (s), 115.8 (d, *J* = 21.7 Hz), 118.5 (s), 124.1 (s), 127.0 (s), 128.4 (s), 129.0 (d, *J* = 8.3 Hz), 130.6 (d, *J* = 3.2 Hz), 139.0 (s), 152.4 (s), 162.8 (d, *J* = 247.2 Hz). HR-MS: Several ionization methods tried. Suspicion that compound is not ionisable.

### 3-[(4-fluorobenzyl)oxy]-*N*-(3-methoxy-5-morpholin-4-yl)pyrazin-2-yl)-4-nitrobenzamide (**14**)

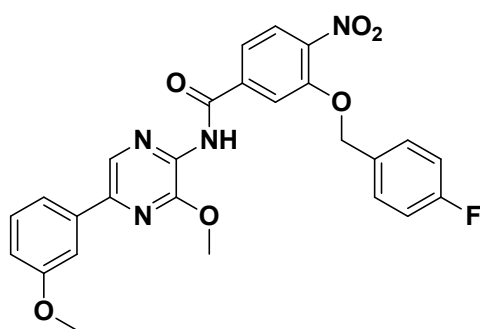

Using **procedure F**, after purification using reverse phase HPLC in ACN/water (from 0% to 80% ACN in 30 minutes), **14** was obtained as yellow crystals (65%). Melting point: 83-85 °C. <sup>1</sup>H-NMR (300 MHz, CDCl<sub>3</sub>, ppm): δ 3.90 (s, 3H), 4.18 (s, 3H), 5.30 (s, 2H), 6.99 (d, *J* = 9Hz, 1H), 7.09 (t, *J* = 9Hz, 2H), 7.37-7.51 (m, 3H), 7.54-7.60 (m, 2H), 7.79 (s, 1H), 7.94 (d, *J* = 9Hz, 1H), 8.45 (s, 1H), 8.50 (s, 1H). <sup>13</sup>C-NMR (75 MHz, CDCl<sub>3</sub>, ppm): δ 54.2 (s), 55.4 (s),



70.9 (s), 112.4 (s), 114.6 (s), 115.3 (s), 115.8 (d,  $J = 21.7$  Hz), 118.4 (s), 118.8 (s), 125.9 (s), 129.2 (d,  $J = 8.3$  Hz), 130.0 (s), 130.7 (d,  $J = 3.3$  Hz), 131.0 (s), 135.8 (s), 137.2 (s), 139.2 (s), 142.3 (s), 144.9 (s), 149.6 (s), 151.9 (s), 160.1 (s), 162.68 (s), 162.73 (d,  $J = 123.7$  Hz). HR-MS: Calculated mass: 505.1518 Mass found: 505.1520.

**(5-amino-6-isopropoxy pyrazin-2-yl)(4-methylpiperazin-1-yl)methanone (15a)**

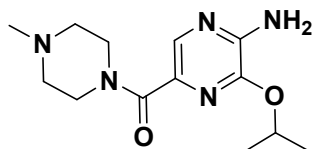

Using **procedure E**, after purification using MPLC (95/5 DCM/MeOH), **15a** was obtained as yellow crystals (62%).  $R_f = 0.15$ .  $^1\text{H-NMR}$  (300 MHz,  $\text{CDCl}_3$ , ppm):  $\delta$  1.38 (d,  $J = 6.2$  Hz, 6H), 2.32 (s, 4H), 2.46 (s, 5H), 3.76 (s, 4H), 5.04 (s, 2H), 5.30 – 5.21 (m, 1H), 8.02 (s, 1H).  $^{13}\text{C-NMR}$  (75 MHz,  $\text{CDCl}_3$ , ppm):  $\delta$  22.0, 46.1, 69.6, 77.0, 77.2, 133.6, 135.7, 145.0, 146.2, 166.2.

**(5-amino-6-methoxy pyrazin-2-yl)(4-methylpiperazin-1-yl)methanone (15b)**

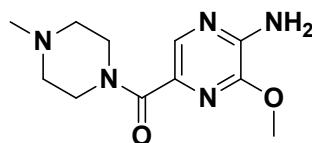

Using **procedure E**, after purification using MPLC (95/5 DCM/MeOH), **15b** was obtained as a yellow solid (53%).  $R_f = 0.12$ . Melting point: 167-170 °C.  $^1\text{H NMR}$  (400 MHz,  $\text{CDCl}_3$ )  $\delta$  2.30 (s, 3H), 2.46 (bs, 4H), 3.76 (bs, 4H), 3.94 (s, 3H), 5.32 (bs, 2H), 8.01 (s, 1H).  $^{13}\text{C NMR}$  (101 MHz,  $\text{CDCl}_3$ )  $\delta$  42.6, 46.0, 47.2, 53.7, 54.6, 55.0, 133.3, 136.2, 145.8, 146.2, 166.1, FT-IR ( $\text{cm}^{-1}$ ): 3394 (- $\text{NH}_2$ ), 2996, 2805, 1611. HR-MS: Calculated mass: 252.1455 Mass found: 252.1453 [M+H].

***tert*-butyl *N*-[(*tert*-butoxy)carbonyl]-*N*-(5-{[5-(4-methylpiperazine-1-carbonyl)-3-(propan-2-yloxy)pyrazin-2-yl]carbamoyl}-3-(2-methylpropoxy)pyrazin-2-yl)carbamate**

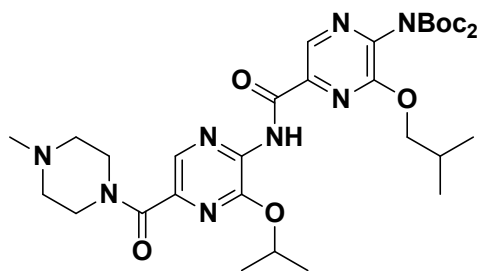

Using procedure E, after purification using MPLC (95/5 DCM/MeOH), the product was obtained as yellow crystals (16% (43% with recovery of starting material)).  $R_f = 0.13$ .  $^1\text{H-NMR}$  (400 MHz,  $\text{CDCl}_3$ , ppm):  $\delta$  1.07 (d,  $J = 6.7$  Hz, 6H), 1.42 (s, 18H), 1.45 (d,  $J = 6.2$  Hz, 6H), 1.79 (s, 2H), 2.23 – 2.10 (m, 1H), 2.33 (s, 4H), 2.41 (s, 2H), 2.52 (s, 2H), 3.61 (s, 2H), 3.81 (s, 2H), 4.26 (d,  $J = 6.5$  Hz, 2H), 5.46 – 5.35 (m, 1H), 8.36 (s, 1H), 8.95 (s, 1H), 10.33 (s, 1H).

$^{13}\text{C-NMR}$  (101 MHz,  $\text{CDCl}_3$ )  $\delta$  19.3, 22.1, 27.9, 28.1, 46.1, 70.9, 73.5, 83.9, 134.7, 135.2, 138.3, 139.5, 139.6, 141.9, 147.3, 149.8, 154.4, 159.7, 165.2. HR-MS: Calculated mass: 673.3668 Mass found: 673.3690 [M+H].

**5-amino-6-isobutoxy-*N*-(3-isopropoxy-5-(4-methylpiperazine-1-carbonyl)pyrazin-2-yl)pyrazine-2-carboxamide (16)**

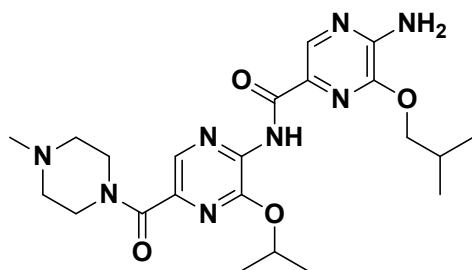

*tert*-butyl *N*-[(*tert*-butoxy)carbonyl]-*N*-(5-{[5-(4-methylpiperazine-1-carbonyl)-3-(propan-2-yloxy)pyrazin-2-yl]carbamoyl}-3-(2-methylpropoxy)pyrazin-2-yl)carbamate (20 mg, 0.030 mmol) was dissolved in 1 mL of DCM under an atmosphere of argon. The solution was cooled to 0 °C in an ice bath and TFA (46  $\mu\text{L}$ , 0.60 mmol) was slowly added while stirring. The reaction mixture was then stirred at RT for 4 hours. After evaporation, **16** was diluted in saturated  $\text{Na}_2\text{CO}_3$ -solution and extracted with DCM. Afterwards, the organic phase was dried and evaporated *in vacuo* to give **16** as a yellow solid.  $^1\text{H-NMR}$  (400 MHz,  $\text{CDCl}_3$ )  $\delta$  1.10 (d,  $J = 6.7$  Hz, 6H), 1.45 (d,  $J = 6.2$  Hz, 6H), 2.26 – 2.16 (m, 1H), 2.34 (s, 3H), 2.42 (s, 1H), 2.52 (s, 2H), 3.64 (s, 2H), 3.82 (s, 2H), 4.25 (d,  $J = 6.6$  Hz, 2H), 5.42 – 5.31 (m, 1H),

5.43 (s, 2H), 8.34 (s, 1H), 8.57 (s, 1H), 10.19 (s, 1H).  $^{13}\text{C}$ -NMR (101 MHz,  $\text{CDCl}_3$ )  $\delta$  19.4, 22.1, 28.0, 29.7, 46.0, 54.7, 55.3, 70.6, 72.9, 129.8, 134.8, 136.4, 138.4, 139.1, 145.9, 147.1, 148.2, 161.1, 165.4. HR-MS: Calculated mass: 473.2619 Mass found: 473.2617 [M+H].

## 4 X-ray structure determination

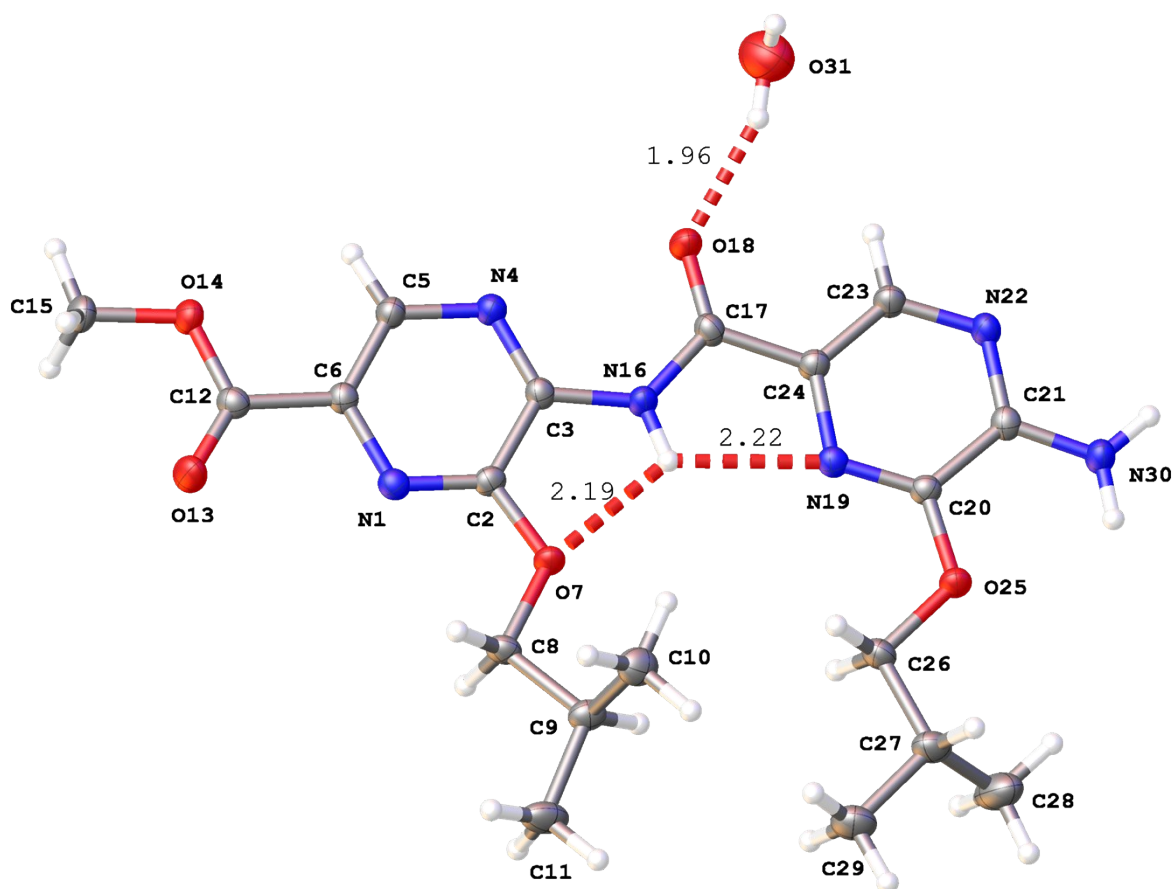

**Figure S1:** Molecular structure of **6b** (CCDC 1512413) with ellipsoids drawn at the 50% probability level. Dashed lines represent hydrogen bonds.

**Table S1:** Crystal data and structure refinement for **6b**.

|                       |                                                               |
|-----------------------|---------------------------------------------------------------|
| Empirical formula     | C <sub>19</sub> H <sub>28</sub> N <sub>6</sub> O <sub>6</sub> |
| Formula weight        | 436.47                                                        |
| Temperature/K         | 120.0                                                         |
| Crystal system        | orthorhombic                                                  |
| Space group           | Pbca                                                          |
| a/Å                   | 17.7469(6)                                                    |
| b/Å                   | 8.5054(3)                                                     |
| c/Å                   | 28.7562(10)                                                   |
| $\alpha$ /°           | 90                                                            |
| $\beta$ /°            | 90                                                            |
| $\gamma$ /°           | 90                                                            |
| Volume/Å <sup>3</sup> | 4340.6(3)                                                     |

|                                                |                                                               |
|------------------------------------------------|---------------------------------------------------------------|
| Z                                              | 8                                                             |
| $\rho_{\text{calc}}/\text{cm}^3$               | 1.336                                                         |
| $\mu/\text{mm}^{-1}$                           | 0.101                                                         |
| F(000)                                         | 1856.0                                                        |
| Crystal size/ $\text{mm}^3$                    | $0.5 \times 0.15 \times 0.15$                                 |
| Radiation                                      | MoK $\alpha$ ( $\lambda = 0.71073 \text{ \AA}$ )              |
| 2 $\Theta$ range for data collection/ $^\circ$ | 5.496 to 52.742                                               |
| Index ranges                                   | $-22 \leq h \leq 22, -9 \leq k \leq 10, -34 \leq l \leq 35$   |
| Reflections collected                          | 28743                                                         |
| Independent reflections                        | 4434 [ $R_{\text{int}} = 0.0375, R_{\text{sigma}} = 0.0257$ ] |
| Data/restraints/parameters                     | 4434/0/288                                                    |
| Goodness-of-fit on $F^2$                       | 1.061                                                         |
| Final R indexes [ $I \geq 2\sigma(I)$ ]        | $R_1 = 0.0530, wR_2 = 0.1498$                                 |
| Final R indexes [all data]                     | $R_1 = 0.0652, wR_2 = 0.1607$                                 |
| Largest diff. peak/hole / $e \text{ \AA}^{-3}$ | 0.35/-0.74                                                    |

**Table S2 Fractional Atomic Coordinates ( $\times 10^4$ ) and Equivalent Isotropic Displacement Parameters ( $\text{\AA}^2 \times 10^3$ ) for 6b.  $U_{\text{eq}}$  is defined as 1/3 of of the trace of the orthogonalised  $U_{ij}$  tensor.**

| Atom | x           | y           | z          | U(eq)    |
|------|-------------|-------------|------------|----------|
| N1   | 3539.3 (9)  | 3645.0 (19) | 3564.6 (5) | 19.5 (4) |
| C2   | 2898.8 (10) | 4087 (2)    | 3740.9 (6) | 18.2 (4) |
| C3   | 2842.9 (10) | 5093 (2)    | 4137.6 (6) | 18.4 (4) |
| N4   | 3450.1 (9)  | 5637 (2)    | 4345.2 (6) | 21.5 (4) |
| C5   | 4121 (1)    | 5175 (2)    | 4161.2 (7) | 20.5 (4) |
| C6   | 4164.8 (10) | 4199 (2)    | 3780.1 (6) | 18.2 (4) |
| O7   | 2236.3 (7)  | 3649.7 (16) | 3553.4 (5) | 21.6 (3) |
| C8   | 2257.7 (11) | 2724 (2)    | 3131.4 (7) | 21.7 (4) |
| C9   | 1480.4 (11) | 2797 (2)    | 2914.2 (7) | 23.6 (4) |
| C10  | 1309.4 (13) | 4450 (3)    | 2740.1 (8) | 30.6 (5) |
| C11  | 1434.5 (14) | 1593 (3)    | 2522.0 (8) | 34.6 (5) |
| C12  | 4896.7 (11) | 3681 (2)    | 3575.8 (7) | 20.8 (4) |
| O13  | 4958.3 (8)  | 2900.0 (19) | 3228.6 (5) | 33.2 (4) |
| O14  | 5480.0 (7)  | 4189.0 (17) | 3831.8 (5) | 24.5 (3) |
| C15  | 6216.9 (11) | 3736 (3)    | 3663.9 (8) | 26.6 (5) |
| N16  | 2121.2 (9)  | 5472 (2)    | 4282.1 (6) | 20.6 (4) |
| C17  | 1899.5 (11) | 6423 (2)    | 4642.2 (7) | 20.8 (4) |
| O18  | 2342.2 (8)  | 7075.5 (18) | 4906.1 (5) | 30.1 (4) |
| N19  | 632.0 (9)   | 5808.2 (19) | 4372.0 (5) | 18.8 (3) |
| C20  | -86.1 (10)  | 5993 (2)    | 4418.3 (6) | 18.4 (4) |

|     |              |             |             |          |
|-----|--------------|-------------|-------------|----------|
| C21 | -415.9 (10)  | 6962 (2)    | 4780.5 (7)  | 19.7 (4) |
| N22 | 27.1 (9)     | 7708 (2)    | 5078.6 (6)  | 22.0 (4) |
| C23 | 771.5 (11)   | 7516 (3)    | 5026.6 (7)  | 22.0 (4) |
| C24 | 1078.3 (10)  | 6589 (2)    | 4685.0 (7)  | 19.8 (4) |
| O25 | -591.7 (7)   | 5311.9 (17) | 4130.8 (5)  | 22.6 (3) |
| C26 | -305.8 (11)  | 4299 (2)    | 3767.1 (7)  | 23.9 (4) |
| C27 | -964.5 (12)  | 3855 (3)    | 3459.2 (8)  | 29.1 (5) |
| C28 | -1573.9 (15) | 3026 (4)    | 3729.7 (10) | 48.4 (7) |
| C29 | -681.2 (14)  | 2837 (3)    | 3056.4 (8)  | 35.4 (5) |
| N30 | -1163.0 (9)  | 7103 (2)    | 4811.6 (6)  | 24.0 (4) |
| O31 | 2410.0 (14)  | 9499 (3)    | 5543.9 (8)  | 62.3 (6) |

**Table S3 Anisotropic Displacement Parameters ( $\text{\AA}^2 \times 10^3$ ) for 6b. The Anisotropic displacement factor exponent takes the form:  $-2\pi^2[h^2a^{*2}U_{11}+2hka^*b^*U_{12}+\dots]$ .**

| Atom | $U_{11}$  | $U_{22}$  | $U_{33}$  | $U_{23}$   | $U_{13}$   | $U_{12}$   |
|------|-----------|-----------|-----------|------------|------------|------------|
| N1   | 21.5 (8)  | 20.5 (8)  | 16.4 (8)  | -0.5 (6)   | -0.5 (6)   | 1.0 (6)    |
| C2   | 18.8 (9)  | 20.4 (10) | 15.3 (9)  | 0.6 (8)    | -2.9 (7)   | 0.0 (7)    |
| C3   | 19.2 (9)  | 20.3 (9)  | 15.6 (9)  | -0.2 (8)   | -0.2 (7)   | 2.5 (7)    |
| N4   | 19.3 (8)  | 25.4 (9)  | 19.9 (8)  | -4.2 (7)   | -0.2 (6)   | 0.3 (6)    |
| C5   | 17.3 (9)  | 24.1 (10) | 20 (1)    | -2.0 (8)   | 0.0 (7)    | 0.5 (7)    |
| C6   | 18.9 (9)  | 20 (1)    | 15.6 (9)  | 0.5 (7)    | 0.2 (7)    | 1.0 (7)    |
| O7   | 18.5 (6)  | 28.9 (8)  | 17.4 (7)  | -7.6 (6)   | -3.4 (5)   | 0.2 (5)    |
| C8   | 25.8 (10) | 23.1 (10) | 16.3 (9)  | -4.6 (8)   | -2.7 (8)   | -0.1 (8)   |
| C9   | 25.2 (10) | 25.6 (11) | 20 (1)    | -0.7 (8)   | -5.5 (8)   | -2.2 (8)   |
| C10  | 32.3 (11) | 29.3 (12) | 30.0 (12) | 0.6 (9)    | -7.8 (9)   | 3.2 (9)    |
| C11  | 41.9 (13) | 30.1 (12) | 31.7 (12) | -7.1 (10)  | -17.3 (10) | 0.8 (10)   |
| C12  | 22.8 (9)  | 22.1 (10) | 17.4 (10) | -1.3 (8)   | 1.2 (7)    | -0.4 (8)   |
| O13  | 23.9 (7)  | 47.3 (10) | 28.4 (8)  | -16.5 (7)  | 2.5 (6)    | 0.9 (7)    |
| O14  | 17.5 (7)  | 32.3 (8)  | 23.8 (7)  | -5.7 (6)   | 2.3 (5)    | -0.3 (6)   |
| C15  | 17.8 (9)  | 32.7 (12) | 29.2 (11) | -5.1 (9)   | 4.3 (8)    | 0.6 (8)    |
| N16  | 17.1 (8)  | 26.5 (9)  | 18.2 (8)  | -5.1 (7)   | -2.2 (6)   | 1.6 (6)    |
| C17  | 21.6 (9)  | 22.9 (10) | 17.8 (9)  | -2.6 (8)   | 0.1 (7)    | 3.3 (8)    |
| O18  | 19.6 (7)  | 41.5 (9)  | 29.2 (8)  | -16.6 (7)  | -2.6 (6)   | 0.5 (6)    |
| N19  | 20.0 (8)  | 21.6 (8)  | 14.7 (8)  | -1.0 (6)   | -1.2 (6)   | 1.3 (6)    |
| C20  | 19.3 (9)  | 20.7 (9)  | 15.2 (9)  | -0.8 (7)   | -1.1 (7)   | -0.7 (7)   |
| C21  | 19.9 (9)  | 22.6 (10) | 16.5 (9)  | 1.2 (8)    | 0.7 (7)    | 2.3 (7)    |
| N22  | 19.9 (8)  | 27.7 (9)  | 18.4 (8)  | -4.4 (7)   | 0.9 (6)    | 2.2 (7)    |
| C23  | 21.0 (9)  | 27.4 (10) | 17.7 (10) | -3.8 (8)   | -2.2 (7)   | 1.5 (8)    |
| C24  | 19.3 (9)  | 23.5 (10) | 16.7 (9)  | -1.5 (8)   | -1.3 (7)   | 0.1 (8)    |
| O25  | 19.5 (6)  | 28.4 (8)  | 20.0 (7)  | -6.9 (6)   | -3.7 (5)   | 0.7 (6)    |
| C26  | 25 (1)    | 25.7 (11) | 21.1 (10) | -7.4 (8)   | -0.8 (8)   | 1.3 (8)    |
| C27  | 30.2 (11) | 30.2 (11) | 27.0 (11) | -8.0 (9)   | -6.9 (9)   | -0.3 (9)   |
| C28  | 37.3 (14) | 61.6 (18) | 46.2 (15) | -22.3 (13) | 3.8 (12)   | -15.8 (12) |
| C29  | 39.2 (12) | 38.7 (13) | 28.5 (12) | -10.3 (10) | -5.6 (10)  | -2.8 (10)  |

|     |           |           |           |            |          |           |
|-----|-----------|-----------|-----------|------------|----------|-----------|
| N30 | 18.3 (8)  | 31.8 (10) | 21.8 (9)  | -5.5 (7)   | 0.4 (7)  | 2.0 (7)   |
| O31 | 61.5 (14) | 62.2 (14) | 63.2 (14) | -15.4 (11) | 7.0 (11) | -5.6 (12) |

**Table S4 Bond Lengths for 6b.**

| Atom | Atom | Length/Å  | Atom | Atom | Length/Å  |
|------|------|-----------|------|------|-----------|
| N1   | C2   | 1.300 (2) | N16  | C17  | 1.372 (3) |
| N1   | C6   | 1.356 (2) | C17  | O18  | 1.225 (2) |
| C2   | C3   | 1.429 (3) | C17  | C24  | 1.469 (3) |
| C2   | O7   | 1.346 (2) | N19  | C20  | 1.291 (2) |
| C3   | N4   | 1.316 (2) | N19  | C24  | 1.371 (2) |
| C3   | N16  | 1.385 (2) | C20  | C21  | 1.451 (3) |
| N4   | C5   | 1.361 (2) | C20  | O25  | 1.351 (2) |
| C5   | C6   | 1.377 (3) | C21  | N22  | 1.325 (3) |
| C6   | C12  | 1.492 (3) | C21  | N30  | 1.334 (2) |
| O7   | C8   | 1.447 (2) | N22  | C23  | 1.339 (2) |
| C8   | C9   | 1.516 (3) | C23  | C24  | 1.372 (3) |
| C9   | C10  | 1.523 (3) | O25  | C26  | 1.447 (2) |
| C9   | C11  | 1.525 (3) | C26  | C27  | 1.515 (3) |
| C12  | O13  | 1.204 (2) | C27  | C28  | 1.507 (3) |
| C12  | O14  | 1.342 (2) | C27  | C29  | 1.531 (3) |
| O14  | C15  | 1.446 (2) |      |      |           |

**Table S5 Bond Angles for 6b.**

| Atom | Atom | Atom | Angle/°     | Atom | Atom | Atom | Angle/°     |
|------|------|------|-------------|------|------|------|-------------|
| C2   | N1   | C6   | 115.92 (16) | C17  | N16  | C3   | 129.01 (16) |
| N1   | C2   | C3   | 123.01 (17) | N16  | C17  | C24  | 113.85 (16) |
| N1   | C2   | O7   | 121.85 (17) | O18  | C17  | N16  | 123.41 (17) |
| O7   | C2   | C3   | 115.12 (16) | O18  | C17  | C24  | 122.74 (17) |
| N4   | C3   | C2   | 121.05 (17) | C20  | N19  | C24  | 116.34 (16) |
| N4   | C3   | N16  | 122.63 (17) | N19  | C20  | C21  | 122.77 (17) |
| N16  | C3   | C2   | 116.32 (16) | N19  | C20  | O25  | 122.71 (17) |
| C3   | N4   | C5   | 116.01 (17) | O25  | C20  | C21  | 114.51 (16) |
| N4   | C5   | C6   | 122.20 (17) | N22  | C21  | C20  | 119.80 (17) |
| N1   | C6   | C5   | 121.81 (17) | N22  | C21  | N30  | 120.21 (17) |
| N1   | C6   | C12  | 115.48 (16) | N30  | C21  | C20  | 119.99 (17) |
| C5   | C6   | C12  | 122.71 (17) | C21  | N22  | C23  | 117.02 (17) |
| C2   | O7   | C8   | 117.60 (14) | N22  | C23  | C24  | 122.80 (18) |
| O7   | C8   | C9   | 107.43 (15) | N19  | C24  | C17  | 118.15 (17) |
| C8   | C9   | C10  | 110.76 (17) | N19  | C24  | C23  | 121.27 (17) |
| C8   | C9   | C11  | 109.02 (17) | C23  | C24  | C17  | 120.58 (17) |
| C10  | C9   | C11  | 111.46 (17) | C20  | O25  | C26  | 117.70 (15) |
| O13  | C12  | C6   | 124.62 (18) | O25  | C26  | C27  | 107.49 (16) |

|             |             |             |             |
|-------------|-------------|-------------|-------------|
| O13 C12 O14 | 124.23 (18) | C26 C27 C29 | 109.26 (18) |
| O14 C12 C6  | 111.14 (16) | C28 C27 C26 | 111.6 (2)   |
| C12 O14 C15 | 115.39 (15) | C28 C27 C29 | 111.21 (19) |

**Table S6 Torsion Angles for 6b.**

| A B C D       | Angle/°     | A B C D         | Angle/°     |
|---------------|-------------|-----------------|-------------|
| N1C2 C3 N4    | 0.4 (3)     | O7 C8 C9 C11    | 169.26 (17) |
| N1C2 C3 N16   | 179.39 (17) | O13C12 O14C15   | 0.0 (3)     |
| N1C2 O7 C8    | -2.9 (3)    | N16C3 N4 C5     | 179.33 (17) |
| N1C6 C12 O13  | 4.2 (3)     | N16C17 C24 N19  | -0.1 (3)    |
| N1C6 C12 O14  | 175.34 (16) | N16C17 C24 C23  | 179.41 (18) |
| C2N1 C6 C5    | -0.2 (3)    | O18C17 C24 N19  | 179.93 (19) |
| C2N1 C6 C12   | 179.81 (16) | O18C17 C24 C23  | 0.7 (3)     |
| C2C3 N4 C5    | -0.4 (3)    | N19C20 C21 N22  | 0.5 (3)     |
| C2C3 N16C17   | 178.75 (18) | N19C20 C21 N30  | 179.76 (18) |
| C2O7 C8 C9    | 163.40 (16) | N19C20 O25 C26  | 1.9 (3)     |
| C3C2 O7 C8    | 175.65 (16) | C20 N19 C24 C17 | 179.44 (17) |
| C3N4 C5 C6    | 0.1 (3)     | C20 N19 C24 C23 | -0.1 (3)    |
| C3N16C17 O18  | -1.7 (3)    | C20 C21 N22 C23 | -0.2 (3)    |
| C3N16C17 C24  | 178.42 (18) | C20 O25 C26 C27 | 172.94 (17) |
| N4C3 N16C17   | 0.2 (3)     | C21 C20 O25 C26 | 178.62 (16) |
| N4C5 C6 N1    | 0.2 (3)     | C21 N22 C23 C24 | -0.3 (3)    |
| N4C5 C6 C12   | 179.84 (18) | N22 C23 C24 C17 | 179.76 (19) |
| C5C6 C12 O13  | -175.8 (2)  | N22 C23 C24 N19 | 0.4 (3)     |
| C5C6 C12 O14  | 4.7 (3)     | C24 N19 C20 C21 | -0.3 (3)    |
| C6N1 C2 C3    | -0.1 (3)    | C24 N19 C20 O25 | 179.06 (17) |
| C6N1 C2 O7    | 178.41 (16) | O25 C20 C21 N22 | 178.94 (17) |
| C6C12 O14 C15 | 179.56 (16) | O25 C20 C21 N30 | 0.8 (3)     |
| O7C2 C3 N4    | 178.15 (17) | O25 C26 C27 C28 | -59.0 (2)   |
| O7C2 C3 N16   | 0.8 (3)     | O25 C26 C27 C29 | 177.60 (17) |
| O7C8 C9 C10   | 67.7 (2)    | N30 C21 N22 C23 | 179.91 (18) |



**Table S7 Hydrogen Atom Coordinates ( $\text{\AA}\times 10^4$ ) and Isotropic Displacement Parameters ( $\text{\AA}^2\times 10^3$ ) for 6b.**

| <b>Atom</b> | <b>x</b> | <b>y</b> | <b>z</b> | <b>U(eq)</b> |
|-------------|----------|----------|----------|--------------|
| H5          | 4574     | 5538     | 4300     | 25           |
| H8A         | 2393     | 1622     | 3204     | 26           |
| H8B         | 2638     | 3155     | 2914     | 26           |
| H9          | 1100     | 2513     | 3157     | 28           |
| H10A        | 1323     | 5187     | 3002     | 46           |
| H10B        | 808      | 4468     | 2597     | 46           |
| H10C        | 1688     | 4758     | 2509     | 46           |
| H11A        | 1828     | 1813     | 2292     | 52           |
| H11B        | 939      | 1659     | 2373     | 52           |
| H11C        | 1507     | 535      | 2649     | 52           |
| H15A        | 6297     | 4181     | 3353     | 40           |
| H15B        | 6249     | 2587     | 3648     | 40           |
| H15C        | 6604     | 4134     | 3877     | 40           |
| H16         | 1754     | 5044     | 4120     | 25           |
| H23         | 1101     | 8043     | 5235     | 26           |
| H26A        | -76      | 3345     | 3904     | 29           |
| H26B        | 83       | 4856     | 3583     | 29           |
| H27         | -1182    | 4842     | 3326     | 35           |
| H28A        | -1977    | 2704     | 3517     | 73           |
| H28B        | -1779    | 3739     | 3966     | 73           |
| H28C        | -1362    | 2095     | 3882     | 73           |
| H29A        | -305     | 3425     | 2877     | 53           |
| H29B        | -1105    | 2560     | 2854     | 53           |
| H29C        | -452     | 1876     | 3180     | 53           |
| H30A        | -1363    | 7693     | 5031     | 29           |
| H30B        | -1456    | 6605     | 4613     | 29           |
| H31A        | 2265     | 8840     | 5340     | 93           |
| H31B        | 2463     | 10397    | 5418     | 93           |

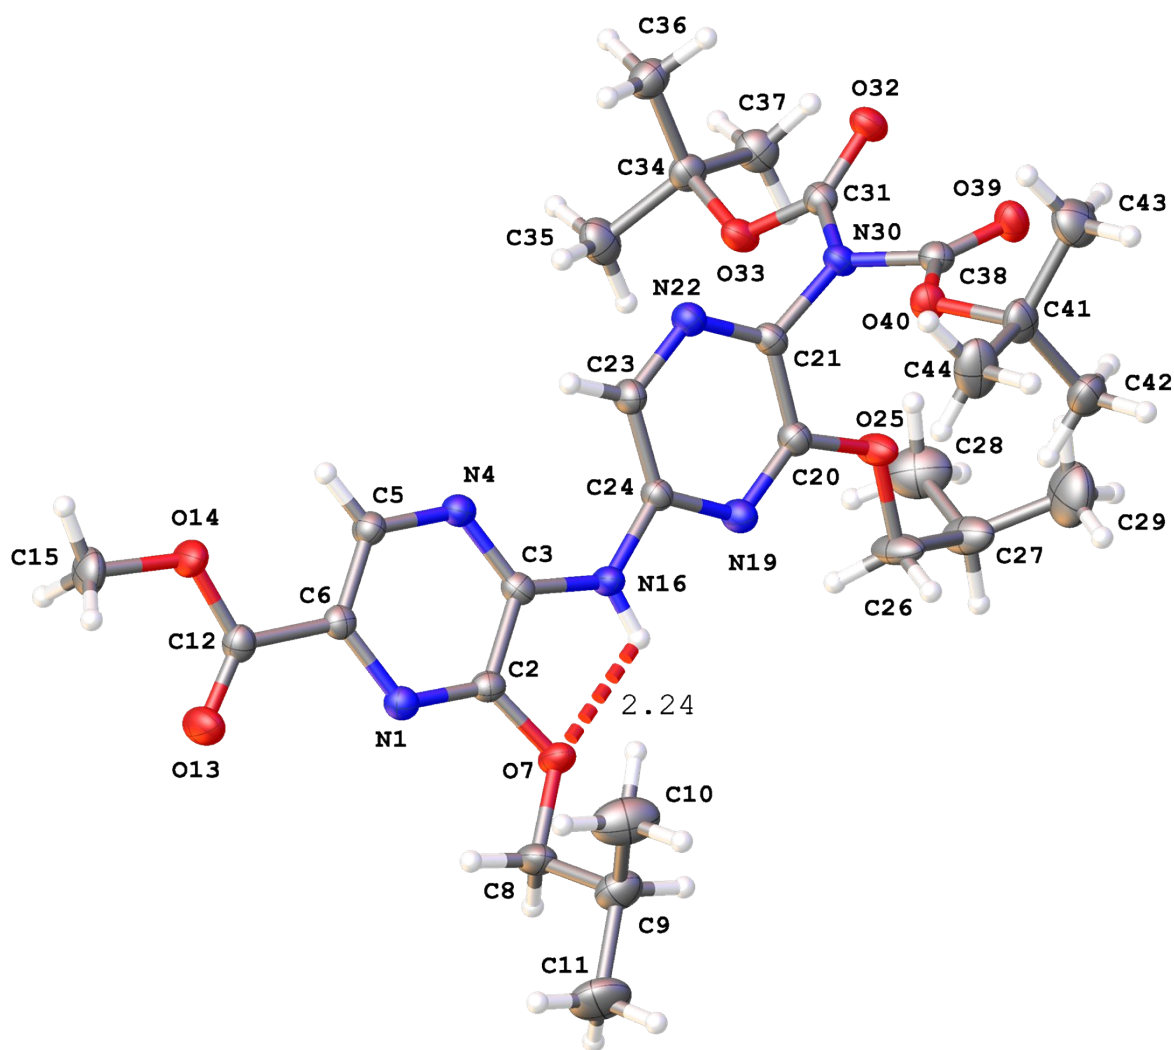

**Figure S2:** Molecular structure of **5b'** (CCDC 1512412) with ellipsoids drawn at the 50% probability level. Dashed lines represent hydrogen bonds.

**Table S8: Crystal data and structure refinement for 5b' (Buchwald-Hartwig amination product)**

|                                    |                                                               |
|------------------------------------|---------------------------------------------------------------|
| Empirical formula                  | C <sub>28</sub> H <sub>42</sub> N <sub>6</sub> O <sub>8</sub> |
| Formula weight                     | 590.67                                                        |
| Temperature/K                      | 110.02(13)                                                    |
| Crystal system                     | monoclinic                                                    |
| Space group                        | P2 <sub>1</sub> /c                                            |
| a/Å                                | 9.6767(4)                                                     |
| b/Å                                | 13.4665(5)                                                    |
| c/Å                                | 25.2462(7)                                                    |
| α/°                                | 90                                                            |
| β/°                                | 100.061(3)                                                    |
| γ/°                                | 90                                                            |
| Volume/Å <sup>3</sup>              | 3239.3(2)                                                     |
| Z                                  | 4                                                             |
| ρ <sub>calc</sub> /cm <sup>3</sup> | 1.211                                                         |

|                                                |                                                               |
|------------------------------------------------|---------------------------------------------------------------|
| $\mu/\text{mm}^{-1}$                           | 0.090                                                         |
| F(000)                                         | 1264.0                                                        |
| Crystal size/ $\text{mm}^3$                    | $0.5 \times 0.3 \times 0.3$                                   |
| Radiation                                      | MoK $\alpha$ ( $\lambda = 0.71073 \text{ \AA}$ )              |
| 2 $\Theta$ range for data collection/ $^\circ$ | 4.912 to 52.744                                               |
| Index ranges                                   | $-11 \leq h \leq 12, -16 \leq k \leq 11, -31 \leq l \leq 31$  |
| Reflections collected                          | 17986                                                         |
| Independent reflections                        | 6598 [ $R_{\text{int}} = 0.0307, R_{\text{sigma}} = 0.0440$ ] |
| Data/restraints/parameters                     | 6598/0/390                                                    |
| Goodness-of-fit on $F^2$                       | 1.095                                                         |
| Final R indexes [ $I \geq 2\sigma(I)$ ]        | $R_1 = 0.0618, wR_2 = 0.1284$                                 |
| Final R indexes [all data]                     | $R_1 = 0.0904, wR_2 = 0.1448$                                 |
| Largest diff. peak/hole / $e \text{ \AA}^{-3}$ | 0.45/-0.27                                                    |

**Table S9 Fractional Atomic Coordinates ( $\times 10^4$ ) and Equivalent Isotropic Displacement Parameters ( $\text{\AA}^2 \times 10^3$ ) for 5b'.  $U_{\text{eq}}$  is defined as 1/3 of of the trace of the orthogonalised  $U_{\text{IJ}}$  tensor.**

| Atom | x            | y           | z           | U(eq)     |
|------|--------------|-------------|-------------|-----------|
| N1   | -560 (2)     | 6686.0 (15) | 254.6 (7)   | 22.1 (4)  |
| C2   | 553 (2)      | 6698.9 (17) | 641.4 (9)   | 20.9 (5)  |
| C3   | 941 (2)      | 5872.9 (17) | 1004.1 (9)  | 20.5 (5)  |
| N4   | 193 (2)      | 5047.6 (15) | 935.0 (8)   | 22.9 (4)  |
| C5   | -952 (2)     | 5036.8 (18) | 521.9 (9)   | 23.1 (5)  |
| C6   | -1340 (2)    | 5834.8 (18) | 194.8 (9)   | 21.0 (5)  |
| O7   | 1432.2 (18)  | 7474.3 (13) | 735.9 (6)   | 27.6 (4)  |
| C8   | 1166 (3)     | 8340 (2)    | 392.6 (11)  | 32.7 (6)  |
| C9   | 2427 (3)     | 8523 (2)    | 143.9 (11)  | 38.2 (7)  |
| C10  | 2728 (4)     | 7651 (3)    | -189.0 (13) | 59.1 (10) |
| C11  | 2175 (4)     | 9472 (2)    | -191.8 (14) | 57.5 (9)  |
| C12  | -2642 (3)    | 5850.3 (19) | -234.0 (9)  | 24.5 (5)  |
| O13  | -3141 (2)    | 6578.5 (14) | -474.2 (7)  | 38.1 (5)  |
| O14  | -3228.3 (18) | 4947.4 (13) | -313.1 (7)  | 31.5 (4)  |
| C15  | -4547 (3)    | 4897 (2)    | -702.0 (11) | 36.7 (7)  |
| N16  | 2081 (2)     | 5993.4 (15) | 1417.8 (7)  | 22.3 (4)  |
| N19  | 3730 (2)     | 5695.3 (15) | 2188.6 (8)  | 24.8 (5)  |
| C20  | 4470 (3)     | 5070.6 (18) | 2535.2 (9)  | 23.6 (5)  |
| C21  | 4245 (2)     | 4040.8 (18) | 2496.4 (9)  | 22.2 (5)  |
| N22  | 3236 (2)     | 3659.0 (15) | 2129.4 (8)  | 24.7 (5)  |
| C23  | 2441 (3)     | 4281.3 (18) | 1777 (1)    | 25.3 (5)  |
| C24  | 2724 (2)     | 5292.4 (17) | 1797.9 (9)  | 20.8 (5)  |
| O25  | 5480.3 (19)  | 5376.6 (13) | 2944.7 (7)  | 31.3 (4)  |
| C26  | 5640 (3)     | 6440.1 (19) | 3039.0 (11) | 40.4 (7)  |
| C27  | 6434 (3)     | 6578 (2)    | 3614.9 (11) | 41.2 (7)  |
| C28  | 5633 (4)     | 6132 (3)    | 4010.8 (12) | 57.1 (9)  |
| C29  | 7927 (4)     | 6191 (3)    | 3702.6 (14) | 64.4 (11) |
| N30  | 5182 (2)     | 3401.3 (14) | 2857.0 (7)  | 21.2 (4)  |

|     |             |             |             |          |
|-----|-------------|-------------|-------------|----------|
| C31 | 4779 (2)    | 2997.5 (18) | 3310.8 (9)  | 22.2 (5) |
| O32 | 5438.7 (18) | 2372.2 (13) | 3595.3 (6)  | 26.9 (4) |
| O33 | 3557.8 (18) | 3406.3 (12) | 3360.5 (6)  | 25.8 (4) |
| C34 | 2720 (3)    | 2949 (2)    | 3723.4 (10) | 27.2 (6) |
| C35 | 1422 (3)    | 3613 (2)    | 3628.5 (11) | 38.0 (7) |
| C36 | 2336 (3)    | 1900 (2)    | 3536.0 (11) | 34.0 (6) |
| C37 | 3508 (3)    | 3008 (2)    | 4304.9 (10) | 33.5 (6) |
| C38 | 6600 (3)    | 3334.7 (18) | 2802.9 (9)  | 23.8 (5) |
| O39 | 7580.8 (18) | 3134.6 (14) | 3158.8 (7)  | 30.2 (4) |
| O40 | 6638.7 (17) | 3539.8 (13) | 2291.4 (6)  | 26.5 (4) |
| C41 | 8023 (3)    | 3644 (2)    | 2130.8 (10) | 31.7 (6) |
| C42 | 8785 (3)    | 4538 (2)    | 2416.1 (12) | 39.7 (7) |
| C43 | 8863 (3)    | 2689 (2)    | 2234.4 (12) | 42.9 (7) |
| C44 | 7574 (3)    | 3838 (3)    | 1531.8 (11) | 47.4 (8) |

**Table S10 Anisotropic Displacement Parameters ( $\text{\AA}^2 \times 10^3$ ) for 5b'. The Anisotropic displacement factor exponent takes the form:  $-2\pi^2[h^2a^*U_{11}+2hka^*b^*U_{12}+\dots]$ .**

| Atom | $U_{11}$  | $U_{22}$  | $U_{33}$  | $U_{23}$  | $U_{13}$   | $U_{12}$  |
|------|-----------|-----------|-----------|-----------|------------|-----------|
| N1   | 24.6 (11) | 22.6 (11) | 18.9 (9)  | 0.3 (8)   | 3.2 (8)    | 0.3 (9)   |
| C2   | 23.6 (12) | 18.7 (12) | 20.9 (11) | -0.5 (9)  | 5.1 (9)    | 0.1 (10)  |
| C3   | 22.5 (12) | 21.4 (12) | 17.6 (11) | -0.2 (9)  | 3.6 (9)    | 2.9 (10)  |
| N4   | 23.6 (11) | 20.4 (10) | 24 (1)    | 1.0 (8)   | 2.6 (8)    | 0.7 (8)   |
| C5   | 23.3 (13) | 22.1 (12) | 23.0 (12) | -1.1 (10) | 1.9 (10)   | -1.9 (10) |
| C6   | 20.8 (12) | 22.6 (12) | 20.1 (11) | -1.4 (9)  | 5.2 (9)    | 1.1 (10)  |
| O7   | 30 (1)    | 22.8 (9)  | 27.4 (9)  | 6.2 (7)   | -1.7 (7)   | -5.5 (8)  |
| C8   | 35.8 (15) | 23.0 (13) | 36.8 (15) | 9.2 (11)  | -0.2 (12)  | -1.3 (12) |
| C9   | 44.7 (18) | 34.0 (16) | 36.4 (15) | 4.6 (12)  | 8.8 (13)   | -7.8 (13) |
| C10  | 90 (3)    | 44 (2)    | 50 (2)    | -1.9 (16) | 31.3 (19)  | -5.6 (19) |
| C11  | 76 (3)    | 43.6 (19) | 55 (2)    | 17.0 (16) | 18.9 (18)  | -9.8 (18) |
| C12  | 22.8 (13) | 29.2 (14) | 21.3 (12) | 0.7 (10)  | 3.2 (10)   | -1.4 (11) |
| O13  | 39.2 (11) | 31.9 (11) | 37.1 (10) | 6.6 (9)   | -9.9 (9)   | -0.6 (9)  |
| O14  | 29 (1)    | 26.4 (10) | 34.9 (10) | -0.9 (8)  | -6.1 (8)   | -5.0 (8)  |
| C15  | 25.9 (14) | 44.4 (17) | 35.2 (15) | -4.4 (13) | -7.2 (11)  | -5.0 (13) |
| N16  | 23.5 (11) | 18.2 (10) | 23.4 (10) | 2.6 (8)   | -1.5 (8)   | -1.7 (8)  |
| N19  | 27.7 (11) | 22.5 (11) | 22.4 (10) | 0.7 (8)   | -0.6 (8)   | 0.3 (9)   |
| C20  | 23.4 (13) | 24.6 (13) | 22.0 (12) | 1.5 (10)  | 2 (1)      | 0.2 (10)  |
| C21  | 22.8 (12) | 23.6 (12) | 20.0 (11) | 3.4 (10)  | 2.9 (9)    | 3.2 (10)  |
| N22  | 24.9 (11) | 23.3 (11) | 24.6 (10) | 1.9 (9)   | 0.9 (8)    | 0.3 (9)   |
| C23  | 23.9 (13) | 24.6 (13) | 25.2 (12) | 0.2 (10)  | -1.9 (10)  | -0.4 (10) |
| C24  | 20.6 (12) | 21.6 (12) | 19.7 (11) | 1.4 (9)   | 2.2 (9)    | 0.6 (10)  |
| O25  | 39.6 (11) | 20.1 (9)  | 28.7 (9)  | 0.1 (7)   | -9.4 (8)   | -0.7 (8)  |
| C26  | 62 (2)    | 17.8 (14) | 34.4 (15) | -0.3 (11) | -11.9 (14) | -4.8 (13) |
| C27  | 60 (2)    | 28.2 (15) | 29.3 (14) | -0.6 (12) | -10.3 (13) | -7.2 (14) |
| C28  | 84 (3)    | 51 (2)    | 37.4 (17) | -7.5 (15) | 12.5 (17)  | -3.7 (19) |

|     |           |           |           |           |            |           |
|-----|-----------|-----------|-----------|-----------|------------|-----------|
| C29 | 51 (2)    | 83 (3)    | 51 (2)    | -6 (2)    | -13.1 (17) | -12 (2)   |
| N30 | 21.6 (10) | 20.6 (10) | 21.4 (10) | 3.1 (8)   | 3.2 (8)    | 3.2 (8)   |
| C31 | 23.1 (12) | 21.2 (12) | 21.9 (12) | -1.3 (10) | 2.6 (9)    | 0.7 (10)  |
| O32 | 27.1 (9)  | 26.3 (9)  | 27.4 (9)  | 6.9 (7)   | 4.9 (7)    | 5.6 (8)   |
| O33 | 26.6 (9)  | 24.5 (9)  | 27.5 (9)  | 5.9 (7)   | 8.0 (7)    | 5.4 (7)   |
| C34 | 26.8 (14) | 29.8 (14) | 26.2 (12) | 4.1 (11)  | 8.4 (10)   | -0.6 (11) |
| C35 | 30.3 (15) | 45.8 (17) | 39.8 (15) | 4.0 (13)  | 11.3 (12)  | 7.6 (13)  |
| C36 | 32.8 (15) | 31.9 (15) | 38.1 (15) | -0.4 (12) | 8.5 (12)   | -4.9 (12) |
| C37 | 36.6 (16) | 38.1 (16) | 26.7 (13) | 1.7 (12)  | 8.3 (11)   | 1.9 (13)  |
| C38 | 25.2 (13) | 20.7 (12) | 25.3 (12) | 1.1 (10)  | 3.9 (10)   | 0.8 (10)  |
| O39 | 23.9 (9)  | 38.2 (11) | 27.2 (9)  | 8.2 (8)   | 1.0 (7)    | 0.8 (8)   |
| O40 | 24.1 (9)  | 32.6 (10) | 23.1 (8)  | 4.2 (7)   | 5.2 (7)    | -0.1 (8)  |
| C41 | 22.9 (13) | 42.3 (16) | 32.1 (14) | 4.8 (12)  | 10.6 (11)  | -0.9 (12) |
| C42 | 30.3 (15) | 40.4 (17) | 47.7 (17) | 11.4 (14) | 5.0 (13)   | -6.2 (13) |
| C43 | 37.1 (17) | 46.0 (18) | 48.2 (17) | 0.8 (14)  | 14.9 (13)  | 9.0 (14)  |
| C44 | 37.4 (17) | 77 (2)    | 30.1 (15) | 9.3 (15)  | 11.8 (13)  | -5.2 (16) |

**Table S11 Bond Lengths for 5b'.**

| Atom | Atom | Length/Å  | Atom | Atom | Length/Å  |
|------|------|-----------|------|------|-----------|
| N1   | C2   | 1.322 (3) | C21  | N30  | 1.451 (3) |
| N1   | C6   | 1.366 (3) | N22  | C23  | 1.359 (3) |
| C2   | C3   | 1.448 (3) | C23  | C24  | 1.388 (3) |
| C2   | O7   | 1.342 (3) | O25  | C26  | 1.456 (3) |
| C3   | N4   | 1.321 (3) | C26  | C27  | 1.533 (4) |
| C3   | N16  | 1.390 (3) | C27  | C28  | 1.494 (4) |
| N4   | C5   | 1.383 (3) | C27  | C29  | 1.515 (5) |
| C5   | C6   | 1.367 (3) | N30  | C31  | 1.384 (3) |
| C6   | C12  | 1.511 (3) | N30  | C38  | 1.405 (3) |
| O7   | C8   | 1.449 (3) | C31  | O32  | 1.213 (3) |
| C8   | C9   | 1.487 (4) | C31  | O33  | 1.330 (3) |
| C9   | C10  | 1.502 (4) | O33  | C34  | 1.461 (3) |
| C9   | C11  | 1.529 (4) | C34  | C35  | 1.527 (4) |
| C12  | O13  | 1.209 (3) | C34  | C36  | 1.516 (4) |
| C12  | O14  | 1.342 (3) | C34  | C37  | 1.533 (3) |
| O14  | C15  | 1.469 (3) | C38  | O39  | 1.218 (3) |
| N16  | C24  | 1.411 (3) | C38  | O40  | 1.327 (3) |
| N19  | C20  | 1.329 (3) | O40  | C41  | 1.472 (3) |
| N19  | C24  | 1.371 (3) | C41  | C42  | 1.526 (4) |
| C20  | C21  | 1.405 (3) | C41  | C43  | 1.520 (4) |
| C20  | O25  | 1.357 (3) | C41  | C44  | 1.521 (4) |
| C21  | N22  | 1.327 (3) |      |      |           |

**Table S12 Bond Angles for 5b'.**

| Atom | Atom | Atom | Angle/°     | Atom | Atom | Atom | Angle/°     |
|------|------|------|-------------|------|------|------|-------------|
| C2   | N1   | C6   | 117.1 (2)   | N19  | C24  | N16  | 113.4 (2)   |
| N1   | C2   | C3   | 123.0 (2)   | N19  | C24  | C23  | 121.7 (2)   |
| N1   | C2   | O7   | 123.5 (2)   | C23  | C24  | N16  | 124.7 (2)   |
| O7   | C2   | C3   | 113.5 (2)   | C20  | O25  | C26  | 117.73 (19) |
| N4   | C3   | C2   | 119.2 (2)   | O25  | C26  | C27  | 107.2 (2)   |
| N4   | C3   | N16  | 122.8 (2)   | C28  | C27  | C26  | 110.7 (3)   |
| N16  | C3   | C2   | 118.0 (2)   | C28  | C27  | C29  | 110.9 (3)   |
| C3   | N4   | C5   | 117.2 (2)   | C29  | C27  | C26  | 113.8 (3)   |
| C6   | C5   | N4   | 123.1 (2)   | C31  | N30  | C21  | 121.12 (19) |
| N1   | C6   | C5   | 120.3 (2)   | C31  | N30  | C38  | 118.45 (19) |
| N1   | C6   | C12  | 116.3 (2)   | C38  | N30  | C21  | 119.40 (19) |
| C5   | C6   | C12  | 123.4 (2)   | O32  | C31  | N30  | 124.6 (2)   |
| C2   | O7   | C8   | 118.63 (18) | O32  | C31  | O33  | 128.0 (2)   |
| O7   | C8   | C9   | 108.2 (2)   | O33  | C31  | N30  | 107.40 (19) |
| C8   | C9   | C10  | 111.2 (3)   | C31  | O33  | C34  | 118.98 (18) |
| C8   | C9   | C11  | 108.0 (3)   | O33  | C34  | C35  | 100.7 (2)   |
| C10  | C9   | C11  | 111.8 (3)   | O33  | C34  | C36  | 109.2 (2)   |
| O13  | C12  | C6   | 125.5 (2)   | O33  | C34  | C37  | 109.9 (2)   |
| O13  | C12  | O14  | 122.6 (2)   | C35  | C34  | C37  | 112.2 (2)   |
| O14  | C12  | C6   | 111.8 (2)   | C36  | C34  | C35  | 110.3 (2)   |
| C12  | O14  | C15  | 115.9 (2)   | C36  | C34  | C37  | 113.6 (2)   |
| C3   | N16  | C24  | 129.1 (2)   | O39  | C38  | N30  | 126.2 (2)   |
| C20  | N19  | C24  | 117.2 (2)   | O39  | C38  | O40  | 127.8 (2)   |
| N19  | C20  | C21  | 121.3 (2)   | O40  | C38  | N30  | 105.98 (19) |
| N19  | C20  | O25  | 122.9 (2)   | C38  | O40  | C41  | 118.00 (18) |
| O25  | C20  | C21  | 115.8 (2)   | O40  | C41  | C42  | 109.5 (2)   |
| C20  | C21  | N30  | 118.0 (2)   | O40  | C41  | C43  | 110.9 (2)   |
| N22  | C21  | C20  | 121.2 (2)   | O40  | C41  | C44  | 100.1 (2)   |
| N22  | C21  | N30  | 120.8 (2)   | C43  | C41  | C42  | 112.8 (2)   |
| C21  | N22  | C23  | 118.8 (2)   | C43  | C41  | C44  | 111.6 (3)   |
| N22  | C23  | C24  | 119.7 (2)   | C44  | C41  | C42  | 111.4 (2)   |

**Table S13 Torsion Angles for 5b'.**

| A  | B  | C   | D   | Angle/°    | A   | B   | C   | D   | Angle/°    |
|----|----|-----|-----|------------|-----|-----|-----|-----|------------|
| N1 | C2 | C3  | N4  | 3.1 (3)    | C20 | C21 | N30 | C31 | 101.5 (3)  |
| N1 | C2 | C3  | N16 | -175.9 (2) | C20 | C21 | N30 | C38 | -66.8 (3)  |
| N1 | C2 | O7  | C8  | -0.9 (3)   | C20 | O25 | C26 | C27 | 160.5 (2)  |
| N1 | C6 | C12 | O13 | -10.3 (4)  | C21 | C20 | O25 | C26 | -173.1 (2) |
| N1 | C6 | C12 | O14 | 171.5 (2)  | C21 | N22 | C23 | C24 | 1.8 (3)    |
| C2 | N1 | C6  | C5  | -0.8 (3)   | C21 | N30 | C31 | O32 | 171.3 (2)  |
| C2 | N1 | C6  | C12 | 177.5 (2)  | C21 | N30 | C31 | O33 | -7.5 (3)   |

|                 |            |                 |             |
|-----------------|------------|-----------------|-------------|
| C2 C3 N4 C5     | -1.7 (3)   | C21 N30 C38 O39 | 152.9 (2)   |
| C2 C3 N16 C24   | -175.3 (2) | C21 N30 C38 O40 | -26.7 (3)   |
| C2 O7 C8 C9     | -122.3 (2) | N22 C21 N30 C31 | -80.8 (3)   |
| C3 C2 O7 C8     | 179.0 (2)  | N22 C21 N30 C38 | 111.0 (3)   |
| C3 N4 C5 C6     | -0.8 (3)   | N22 C23 C24 N16 | 172.5 (2)   |
| C3 N16 C24 N19  | -173.0 (2) | N22 C23 C24 N19 | -4.3 (4)    |
| C3 N16 C24 C23  | 10.0 (4)   | C24 N19 C20 C21 | 1.1 (3)     |
| N4 C3 N16 C24   | 5.7 (4)    | C24 N19 C20 O25 | -179.0 (2)  |
| N4 C5 C6 N1     | 2.2 (4)    | O25 C20 C21 N22 | 176.5 (2)   |
| N4 C5 C6 C12    | -176.0 (2) | O25 C20 C21 N30 | -5.7 (3)    |
| C5 C6 C12 O13   | 168.0 (2)  | O25 C26 C27 C28 | -60.3 (3)   |
| C5 C6 C12 O14   | -10.2 (3)  | O25 C26 C27 C29 | 65.4 (3)    |
| C6 N1 C2 C3     | -1.8 (3)   | N30 C21 N22 C23 | -175.7 (2)  |
| C6 N1 C2 O7     | 178.1 (2)  | N30 C31 O33 C34 | 165.14 (19) |
| C6 C12 O14 C15  | 176.7 (2)  | N30 C38 O40 C41 | 172.8 (2)   |
| O7 C2 C3 N4     | -176.8 (2) | C31 N30 C38 O39 | -15.7 (4)   |
| O7 C2 C3 N16    | 4.2 (3)    | C31 N30 C38 O40 | 164.8 (2)   |
| O7 C8 C9 C10    | 60.3 (3)   | C31 O33 C34 C35 | -177.0 (2)  |
| O7 C8 C9 C11    | -176.7 (2) | C31 O33 C34 C36 | -60.9 (3)   |
| O13 C12 O14 C15 | -1.6 (4)   | C31 O33 C34 C37 | 64.4 (3)    |
| N16 C3 N4 C5    | 177.3 (2)  | O32 C31 O33 C34 | -13.6 (4)   |
| N19 C20 C21 N22 | -3.5 (4)   | C38 N30 C31 O32 | -20.4 (3)   |
| N19 C20 C21 N30 | 174.2 (2)  | C38 N30 C31 O33 | 160.8 (2)   |
| N19 C20 O25 C26 | 7.0 (4)    | C38 O40 C41 C42 | -64.5 (3)   |
| C20 N19 C24 N16 | -174.4 (2) | C38 O40 C41 C43 | 60.5 (3)    |
| C20 N19 C24 C23 | 2.8 (3)    | C38 O40 C41 C44 | 178.4 (2)   |
| C20 C21 N22 C23 | 2.0 (3)    | O39 C38 O40 C41 | -6.8 (4)    |

**Table S14 Hydrogen Atom Coordinates ( $\text{\AA}\times 10^4$ ) and Isotropic Displacement Parameters ( $\text{\AA}^2\times 10^3$ ) for 5b'.**

| Atom | x     | y     | z     | U(eq) |
|------|-------|-------|-------|-------|
| H5   | -1496 | 4447  | 463   | 28    |
| H8A  | 978   | 8925  | 607   | 39    |
| H8B  | 336   | 8225  | 109   | 39    |
| H9   | 3252  | 8630  | 437   | 46    |
| H10A | 2860  | 7055  | 37    | 89    |
| H10B | 3583  | 7780  | -336  | 89    |
| H10C | 1939  | 7550  | -485  | 89    |
| H11A | 1393  | 9367  | -490  | 86    |
| H11B | 3024  | 9639  | -335  | 86    |
| H11C | 1945  | 10017 | 35    | 86    |
| H15A | -4423 | 5225  | -1037 | 55    |
| H15B | -5292 | 5232  | -553  | 55    |
| H15C | -4804 | 4200  | -776  | 55    |

|      |      |      |      |    |
|------|------|------|------|----|
| H16  | 2454 | 6591 | 1447 | 27 |
| H23  | 1696 | 4026 | 1518 | 30 |
| H26A | 4709 | 6764 | 2996 | 49 |
| H26B | 6174 | 6741 | 2779 | 49 |
| H27  | 6490 | 7309 | 3686 | 49 |
| H28A | 4665 | 6378 | 3940 | 86 |
| H28B | 6077 | 6319 | 4376 | 86 |
| H28C | 5632 | 5407 | 3976 | 86 |
| H29A | 7915 | 5469 | 3654 | 97 |
| H29B | 8396 | 6354 | 4068 | 97 |
| H29C | 8435 | 6499 | 3442 | 97 |
| H35A | 1688 | 4292 | 3743 | 57 |
| H35B | 731  | 3362 | 3837 | 57 |
| H35C | 1012 | 3612 | 3245 | 57 |
| H36A | 1872 | 1912 | 3159 | 51 |
| H36B | 1700 | 1613 | 3757 | 51 |
| H36C | 3190 | 1496 | 3571 | 51 |
| H37A | 4302 | 2546 | 4353 | 50 |
| H37B | 2871 | 2830 | 4552 | 50 |
| H37C | 3854 | 3686 | 4382 | 50 |
| H42A | 8195 | 5131 | 2340 | 60 |
| H42B | 9672 | 4641 | 2286 | 60 |
| H42C | 8978 | 4417 | 2805 | 60 |
| H43A | 9122 | 2580 | 2623 | 64 |
| H43B | 9716 | 2740 | 2076 | 64 |
| H43C | 8294 | 2130 | 2071 | 64 |
| H44A | 6999 | 3283 | 1367 | 71 |
| H44B | 8409 | 3903 | 1363 | 71 |
| H44C | 7026 | 4453 | 1479 | 71 |



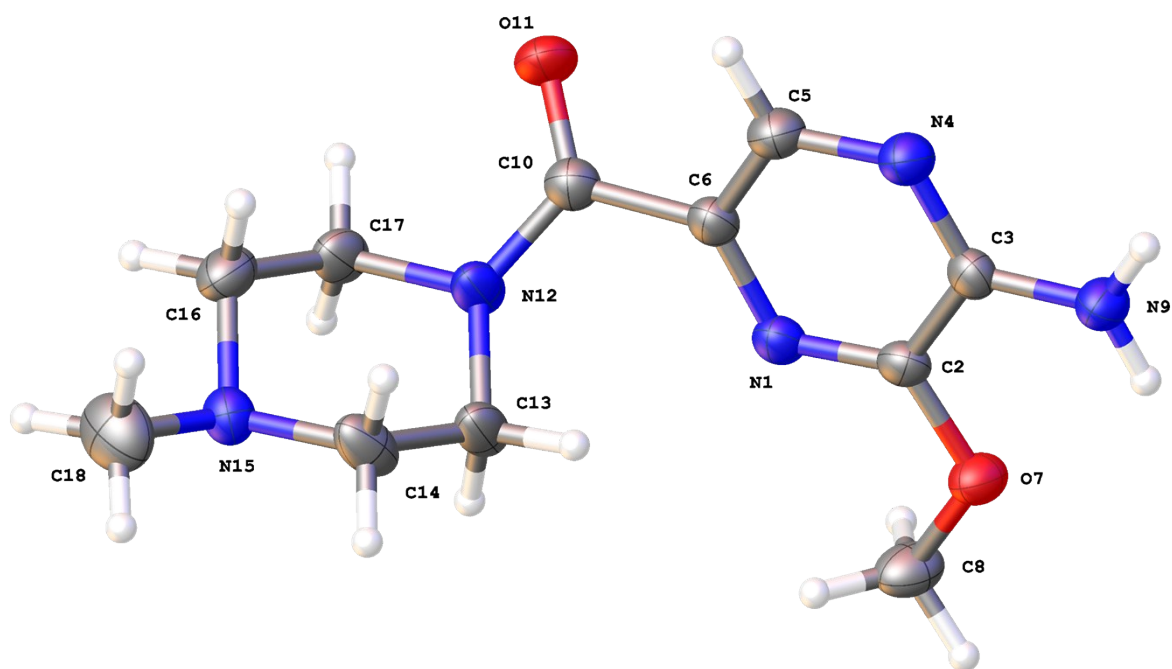

**Figure S3:** Molecular structure of **15b** (CCDC 1512414) with ellipsoids drawn at the 50% probability level.

**Table S15: Crystal data and structure refinement for 15b**

|                                    |                                                               |
|------------------------------------|---------------------------------------------------------------|
| Empirical formula                  | C <sub>11</sub> H <sub>17</sub> N <sub>5</sub> O <sub>2</sub> |
| Formula weight                     | 251.29                                                        |
| Temperature/K                      | 150                                                           |
| Crystal system                     | orthorhombic                                                  |
| Space group                        | P2 <sub>1</sub> 2 <sub>1</sub> 2 <sub>1</sub>                 |
| a/Å                                | 12.7749(11)                                                   |
| b/Å                                | 10.4901(10)                                                   |
| c/Å                                | 9.5080(13)                                                    |
| α/°                                | 90                                                            |
| β/°                                | 90                                                            |
| γ/°                                | 90                                                            |
| Volume/Å <sup>3</sup>              | 1274.2(2)                                                     |
| Z                                  | 4                                                             |
| ρ <sub>calc</sub> /cm <sup>3</sup> | 1.310                                                         |
| μ/mm <sup>-1</sup>                 | 0.094                                                         |
| F(000)                             | 536.0                                                         |
| Crystal size/mm <sup>3</sup>       | 0.5 × 0.35 × 0.25                                             |
| Radiation                          | MoKα (λ = 0.71073 Å)                                          |
| 2θ range for data collection/°     | 5.024 to 52.734                                               |
| Index ranges                       | -15 ≤ h ≤ 15, -13 ≤ k ≤ 11, -11 ≤ l ≤ 11                      |
| Reflections collected              | 7542                                                          |
| Independent reflections            | 2589 [R <sub>int</sub> = 0.0267, R <sub>sigma</sub> = 0.0346] |
| Data/restraints/parameters         | 2589/0/165                                                    |
| Goodness-of-fit on F <sup>2</sup>  | 1.064                                                         |

Final R indexes [ $I \geq 2\sigma(I)$ ]  $R_1 = 0.0393$ ,  $wR_2 = 0.0869$   
 Final R indexes [all data]  $R_1 = 0.0511$ ,  $wR_2 = 0.0945$   
 Largest diff. peak/hole /  $e \text{ \AA}^{-3}$  0.13/-0.18  
 Flack parameter 0.8(7)

**Table S16 Fractional Atomic Coordinates ( $\times 10^4$ ) and Equivalent Isotropic Displacement Parameters ( $\text{\AA}^2 \times 10^3$ ) for 15b.  $U_{eq}$  is defined as 1/3 of the trace of the orthogonalized  $U_{ij}$  tensor.**

| Atom | x           | y            | z         | U(eq)    |
|------|-------------|--------------|-----------|----------|
| N1   | 3756.1 (15) | 9096.6 (19)  | 518 (2)   | 29.4 (5) |
| C2   | 4203.0 (17) | 7981 (2)     | 529 (3)   | 27.4 (5) |
| C3   | 3852.1 (18) | 6923 (2)     | -287 (3)  | 28.2 (5) |
| N4   | 3025.2 (16) | 7055.6 (19)  | -1115 (3) | 33.5 (5) |
| C5   | 2551 (2)    | 8220 (2)     | -1120 (3) | 35.1 (6) |
| C6   | 2902.6 (17) | 9220 (2)     | -325 (3)  | 29.8 (6) |
| O7   | 5057.6 (13) | 7762.9 (16)  | 1336 (2)  | 34.4 (4) |
| C8   | 5413 (2)    | 8833 (3)     | 2151 (3)  | 41.0 (7) |
| N9   | 4344.4 (15) | 5792 (2)     | -201 (2)  | 33.8 (5) |
| C10  | 2319.5 (18) | 10460 (2)    | -332 (3)  | 31.9 (6) |
| O11  | 1354.1 (13) | 10453.9 (16) | -354 (2)  | 43.3 (5) |
| N12  | 2869.6 (15) | 11562.3 (18) | -295 (3)  | 36.4 (6) |
| C13  | 3982.5 (19) | 11709 (2)    | -627 (4)  | 42.9 (8) |
| C14  | 4114 (2)    | 12406 (2)    | -2000 (3) | 42.4 (8) |
| N15  | 3590.8 (17) | 13638.3 (19) | -1968 (2) | 32.6 (5) |
| C16  | 2476 (2)    | 13468 (3)    | -1658 (3) | 39.6 (7) |
| C17  | 2328.8 (19) | 12785 (2)    | -287 (3)  | 36.2 (6) |
| C18  | 3728 (3)    | 14315 (3)    | -3294 (3) | 54.9 (9) |

**Table S17 Anisotropic Displacement Parameters ( $\text{\AA}^2 \times 10^3$ ) for 15b. The Anisotropic displacement factor exponent takes the form:  $-2\pi^2[h^2a^{*2}U_{11}+2hka^*b^*U_{12}+\dots]$ .**

| Atom | $U_{11}$  | $U_{22}$  | $U_{33}$  | $U_{23}$   | $U_{13}$   | $U_{12}$  |
|------|-----------|-----------|-----------|------------|------------|-----------|
| N1   | 23.8 (10) | 27 (1)    | 37.4 (13) | 1.3 (10)   | 2.2 (10)   | -1.9 (8)  |
| C2   | 21.2 (11) | 29.9 (13) | 31.1 (13) | 2.2 (11)   | 1.7 (11)   | -4.1 (10) |
| C3   | 26.2 (12) | 25.3 (12) | 33.1 (14) | 4.9 (11)   | 2.1 (11)   | -1.9 (10) |
| N4   | 28.8 (11) | 29.8 (11) | 42.0 (13) | -1.2 (11)  | -3.8 (11)  | 0.0 (9)   |
| C5   | 27.7 (13) | 34.9 (14) | 42.8 (16) | 2.0 (13)   | -5.7 (13)  | -1.0 (11) |
| C6   | 23.4 (12) | 26.6 (12) | 39.4 (15) | 2.5 (12)   | 2.6 (12)   | -2 (1)    |
| O7   | 28.8 (9)  | 32.2 (9)  | 42.0 (11) | -4.3 (9)   | -7.3 (8)   | 1.4 (8)   |
| C8   | 33.2 (14) | 42.5 (17) | 47.5 (17) | -12.0 (14) | -10.2 (13) | 1.2 (12)  |
| N9   | 30.1 (11) | 27.4 (11) | 44.0 (13) | -1.1 (11)  | -6.9 (11)  | 0.4 (9)   |
| C10  | 27.1 (12) | 31.9 (13) | 36.8 (15) | 2.0 (13)   | 0.9 (12)   | -0.6 (11) |
| O11  | 21.9 (9)  | 39.6 (10) | 68.5 (14) | 4.0 (11)   | -1.5 (10)  | 0.5 (8)   |
| N12  | 23 (1)    | 25.7 (11) | 60.5 (15) | 1.6 (12)   | 9.0 (11)   | 3.0 (8)   |
| C13  | 23.6 (13) | 26.1 (12) | 79 (2)    | 5.1 (15)   | 8.6 (14)   | 3.0 (11)  |

|     |           |           |           |           |           |           |
|-----|-----------|-----------|-----------|-----------|-----------|-----------|
| C14 | 34.5 (15) | 27.5 (14) | 65 (2)    | -9.0 (15) | 18.4 (15) | -3.4 (12) |
| N15 | 33.5 (11) | 28.3 (11) | 35.9 (12) | 2.8 (10)  | -0.3 (10) | -0.3 (10) |
| C16 | 32.3 (14) | 36.4 (15) | 50.2 (18) | -1.4 (14) | -9.4 (13) | 3.5 (12)  |
| C17 | 24.0 (12) | 29.7 (14) | 54.7 (18) | -3.3 (14) | 5.3 (13)  | 5.4 (10)  |
| C18 | 68 (2)    | 58 (2)    | 39.0 (18) | 7.5 (16)  | 1.3 (16)  | -8.3 (18) |

**Table S18 Bond Lengths for 15b.**

| Atom | Atom | Length/Å  | Atom | Atom | Length/Å  |
|------|------|-----------|------|------|-----------|
| N1   | C2   | 1.302 (3) | C10  | O11  | 1.234 (3) |
| N1   | C6   | 1.359 (3) | C10  | N12  | 1.353 (3) |
| C2   | C3   | 1.426 (3) | N12  | C13  | 1.464 (3) |
| C2   | O7   | 1.354 (3) | N12  | C17  | 1.457 (3) |
| C3   | N4   | 1.325 (3) | C13  | C14  | 1.506 (4) |
| C3   | N9   | 1.345 (3) | C14  | N15  | 1.455 (3) |
| N4   | C5   | 1.363 (3) | N15  | C16  | 1.465 (3) |
| C5   | C6   | 1.369 (4) | N15  | C18  | 1.458 (4) |
| C6   | C10  | 1.499 (3) | C16  | C17  | 1.499 (4) |
| O7   | C8   | 1.437 (3) |      |      |           |

**Table S19 Bond Angles for 15b.**

| Atom | Atom | Atom | Angle/°     | Atom | Atom | Atom | Angle/°     |
|------|------|------|-------------|------|------|------|-------------|
| C2   | N1   | C6   | 116.2 (2)   | O11  | C10  | C6   | 119.5 (2)   |
| N1   | C2   | C3   | 123.9 (2)   | O11  | C10  | N12  | 121.6 (2)   |
| N1   | C2   | O7   | 120.7 (2)   | N12  | C10  | C6   | 118.90 (19) |
| O7   | C2   | C3   | 115.5 (2)   | C10  | N12  | C13  | 126.1 (2)   |
| N4   | C3   | C2   | 119.5 (2)   | C10  | N12  | C17  | 120.39 (19) |
| N4   | C3   | N9   | 120.1 (2)   | C17  | N12  | C13  | 111.64 (19) |
| N9   | C3   | C2   | 120.4 (2)   | N12  | C13  | C14  | 110.2 (2)   |
| C3   | N4   | C5   | 116.8 (2)   | N15  | C14  | C13  | 111.2 (2)   |
| N4   | C5   | C6   | 122.6 (2)   | C14  | N15  | C16  | 110.00 (19) |
| N1   | C6   | C5   | 121.0 (2)   | C14  | N15  | C18  | 111.0 (2)   |
| N1   | C6   | C10  | 118.9 (2)   | C18  | N15  | C16  | 110.5 (2)   |
| C5   | C6   | C10  | 120.0 (2)   | N15  | C16  | C17  | 110.8 (2)   |
| C2   | O7   | C8   | 115.35 (19) | N12  | C17  | C16  | 110.9 (2)   |

**Table S20 Torsion Angles for 15b.**

| A  | B  | C  | D  | Angle/°    | A  | B   | C   | D   | Angle/°    |
|----|----|----|----|------------|----|-----|-----|-----|------------|
| N1 | C2 | C3 | N4 | 0.1 (4)    | C6 | C10 | N12 | C17 | -179.4 (3) |
| N1 | C2 | C3 | N9 | -178.8 (2) | O7 | C2  | C3  | N4  | -179.5 (2) |
| N1 | C2 | O7 | C8 | 0.0 (3)    | O7 | C2  | C3  | N9  | 1.6 (3)    |

|             |           |              |           |
|-------------|-----------|--------------|-----------|
| N1C6 C10O11 | -138.8(3) | N9 C3 N4 C5  | 178.3(2)  |
| N1C6 C10N12 | 40.3(4)   | C10N12C13C14 | 109.0(3)  |
| C2N1 C6 C5  | -0.6(4)   | C10N12C17C16 | -109.6(3) |
| C2N1 C6 C10 | 177.0(2)  | O11C10N12C13 | -163.2(3) |
| C2C3 N4 C5  | -0.6(4)   | O11C10N12C17 | -0.3(4)   |
| C3C2 O7 C8  | 179.7(2)  | N12C13C14N15 | 56.6(3)   |
| C3N4 C5 C6  | 0.5(4)    | C13N12C17C16 | 55.6(3)   |
| N4C5 C6 N1  | 0.1(4)    | C13C14N15C16 | -57.9(3)  |
| N4C5 C6 C10 | -177.5(2) | C13C14N15C18 | 179.4(2)  |
| C5C6 C10O11 | 38.8(4)   | C14N15C16C17 | 57.6(3)   |
| C5C6 C10N12 | -142.1(3) | N15C16C17N12 | -56.6(3)  |
| C6N1 C2 C3  | 0.5(3)    | C17N12C13C14 | -55.2(3)  |
| C6N1 C2 O7  | -179.9(2) | C18N15C16C17 | -179.4(2) |
| C6C10N12C13 | 17.7(4)   |              |           |

**Table S21 Hydrogen Atom Coordinates ( $\text{\AA} \times 10^4$ ) and Isotropic Displacement Parameters ( $\text{\AA}^2 \times 10^3$ ) for 15b.**

| Atom | <i>x</i> | <i>y</i> | <i>z</i> | U(eq) |
|------|----------|----------|----------|-------|
| H5   | 1952     | 8341     | -1697    | 42    |
| H8A  | 5507     | 9572     | 1533     | 62    |
| H8B  | 6082     | 8622     | 2600     | 62    |
| H8C  | 4893     | 9035     | 2875     | 62    |
| H9A  | 4117     | 5139     | -695     | 41    |
| H9B  | 4894     | 5705     | 350      | 41    |
| H13A | 4315     | 10859    | -692     | 51    |
| H13B | 4333     | 12191    | 134      | 51    |
| H14A | 4869     | 12533    | -2190    | 51    |
| H14B | 3819     | 11884    | -2772    | 51    |
| H16A | 2144     | 12972    | -2422    | 48    |
| H16B | 2130     | 14311    | -1612    | 48    |
| H17A | 2604     | 13318    | 489      | 43    |
| H17B | 1573     | 12645    | -120     | 43    |
| H18A | 4477     | 14404    | -3496    | 82    |
| H18B | 3409     | 15162    | -3225    | 82    |
| H18C | 3392     | 13835    | -4053    | 82    |

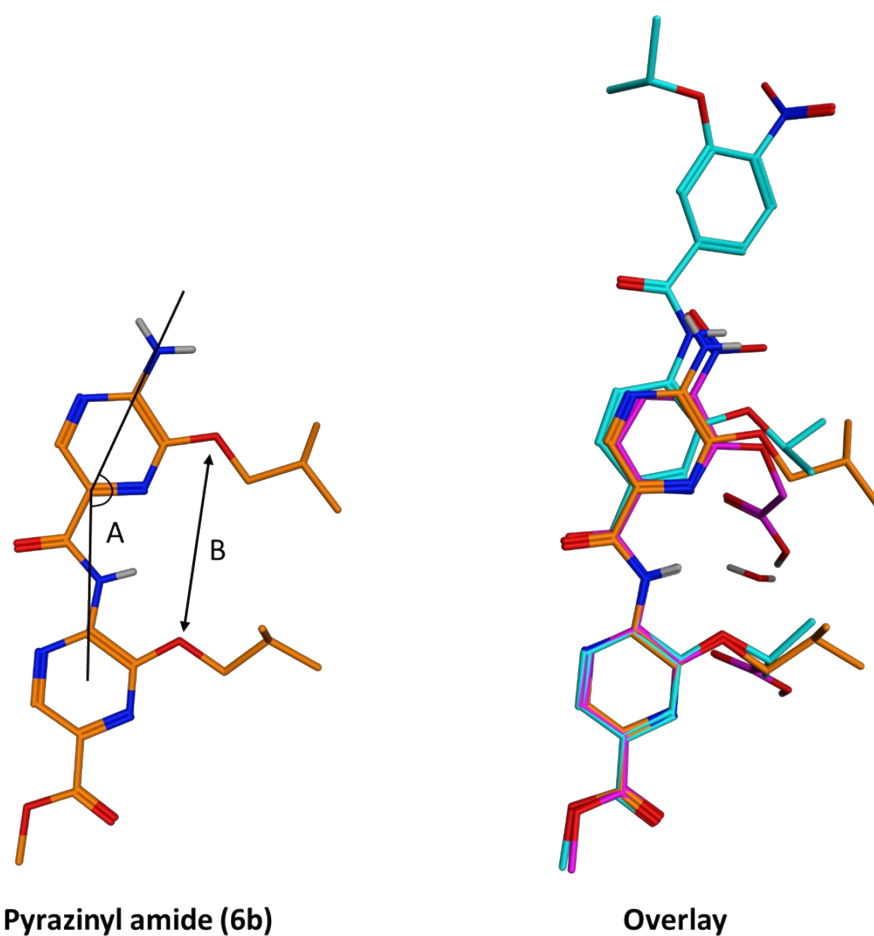

**Figure S4** Angle of inclination and overlay analysis of Wilson's benzamide crystal, Hamilton's pyridine crystal and our pyrazine crystal

| Compound                     | Angle of inclination (A) | Distance between side chains (B) |
|------------------------------|--------------------------|----------------------------------|
| Benzamide <sup>a</sup>       | 159.6 °                  | 5.9 Å                            |
| Pyridinyl amide <sup>b</sup> | 152.0 °                  | 5.2 Å                            |
| Pyrazinyl amide <sup>c</sup> | 155.9 °                  | 5.5 Å                            |

<sup>a</sup> CCDC 870274, <sup>b</sup> CCDC 697087, <sup>c</sup> CCDC 1512413

## 5 NMR Spectra

### 3,5-dibromo-2-aminopyrazine

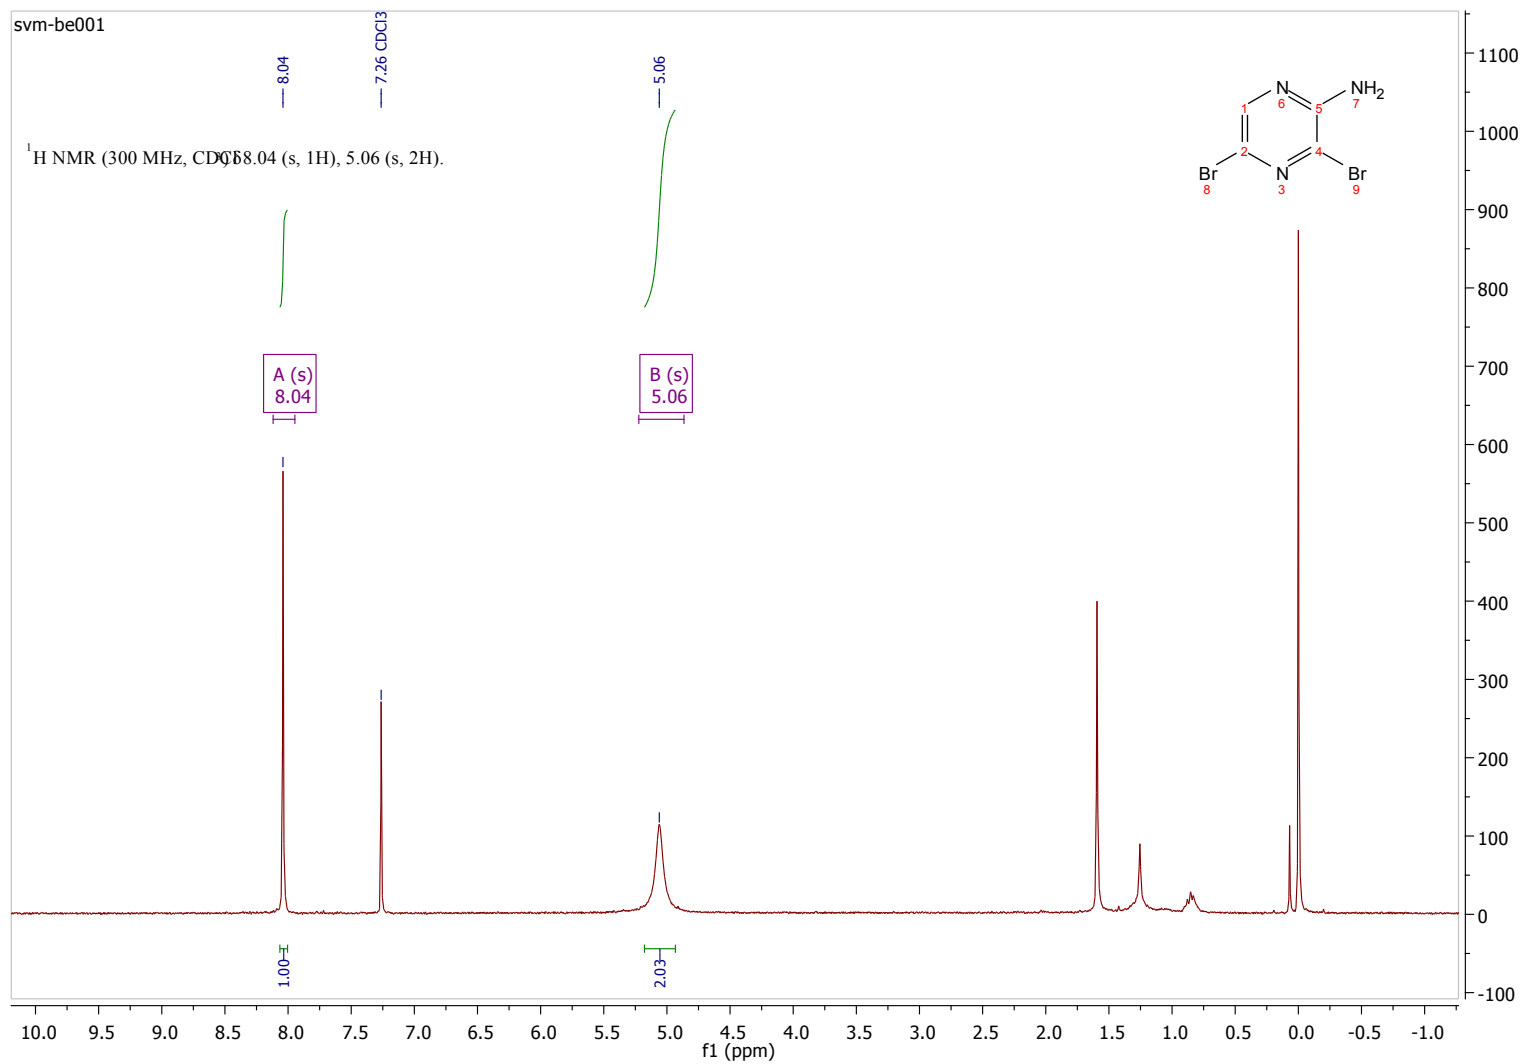

### 3,5-dibromo-2-aminopyrazine

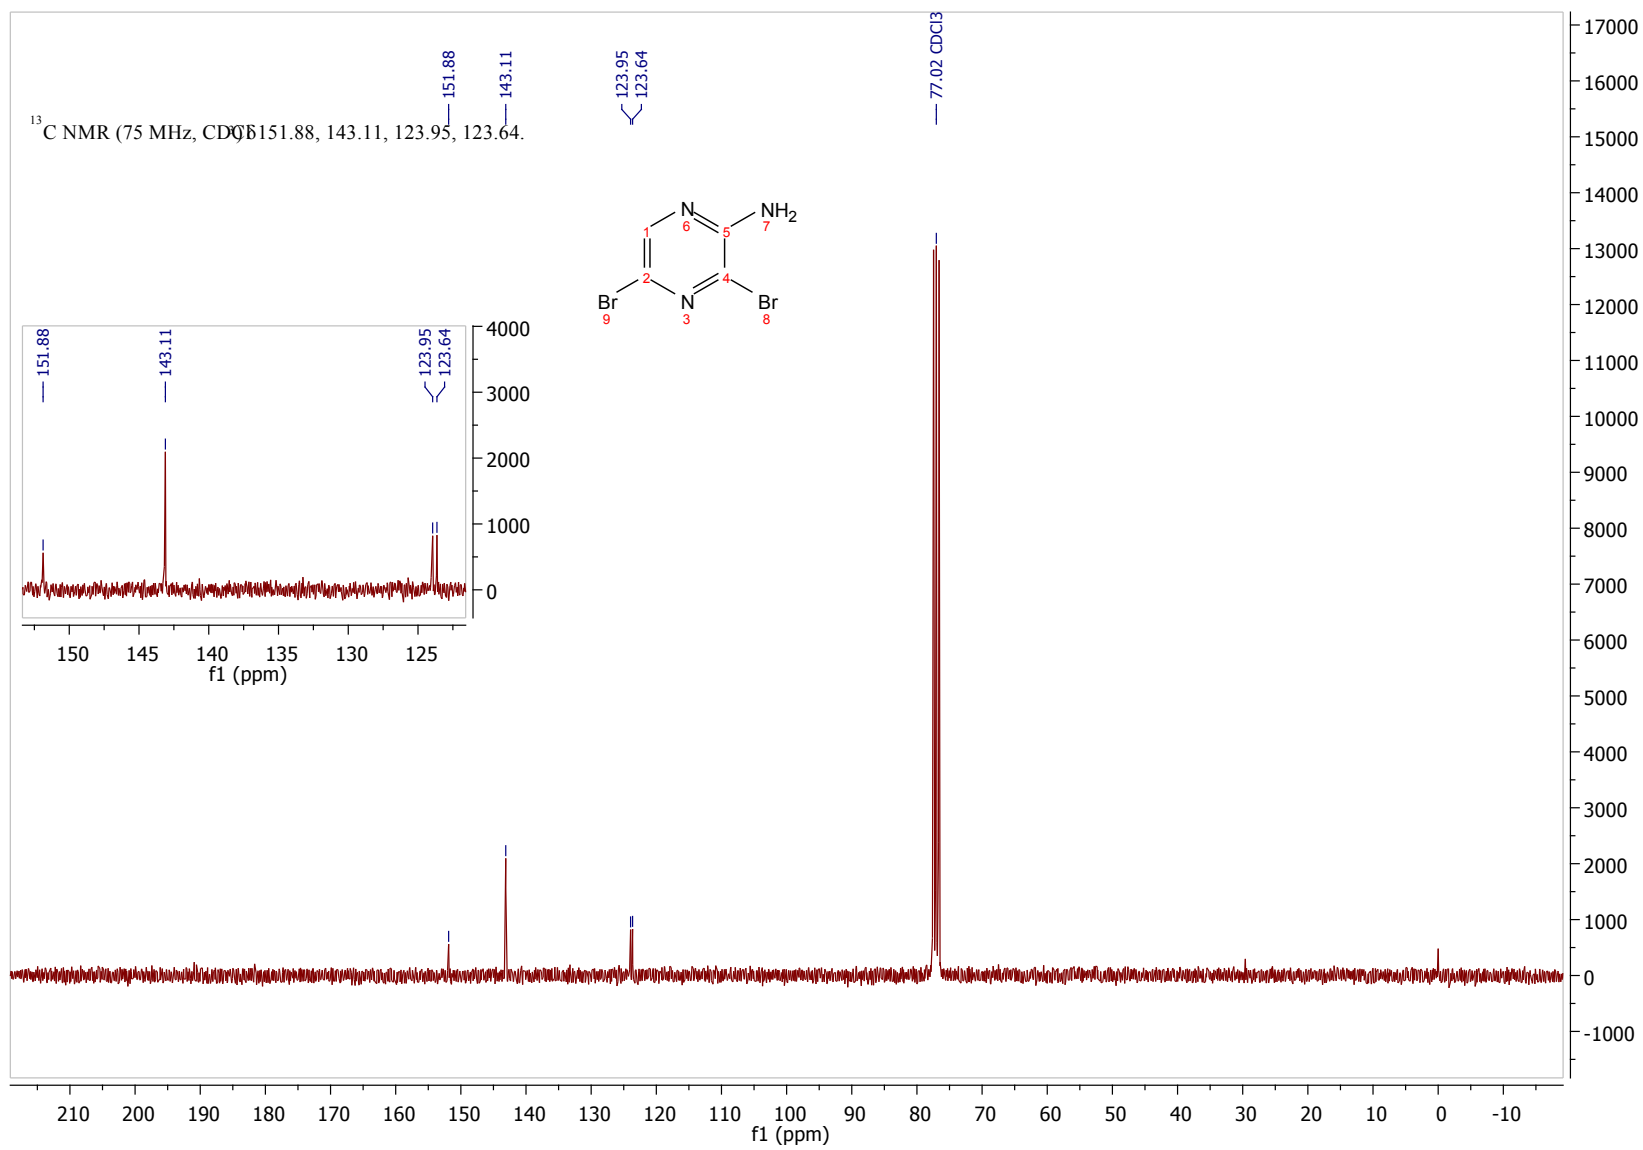

1a

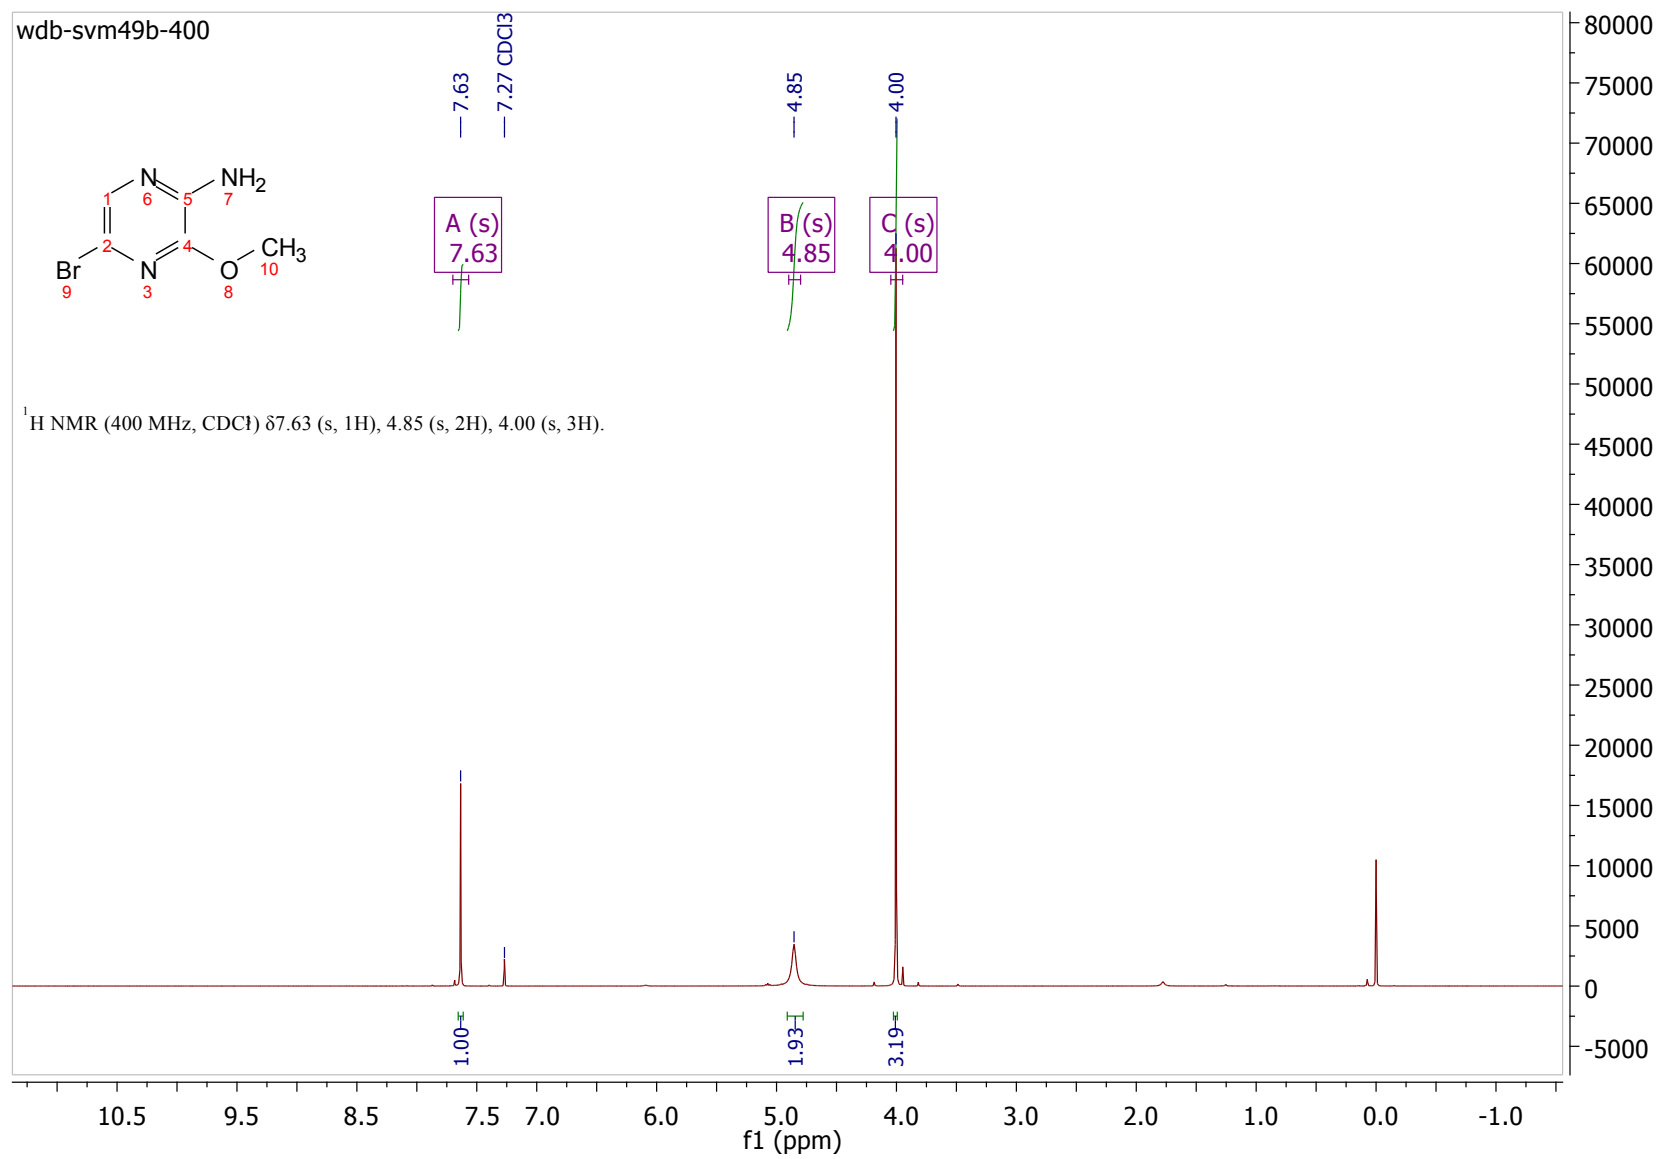



1a

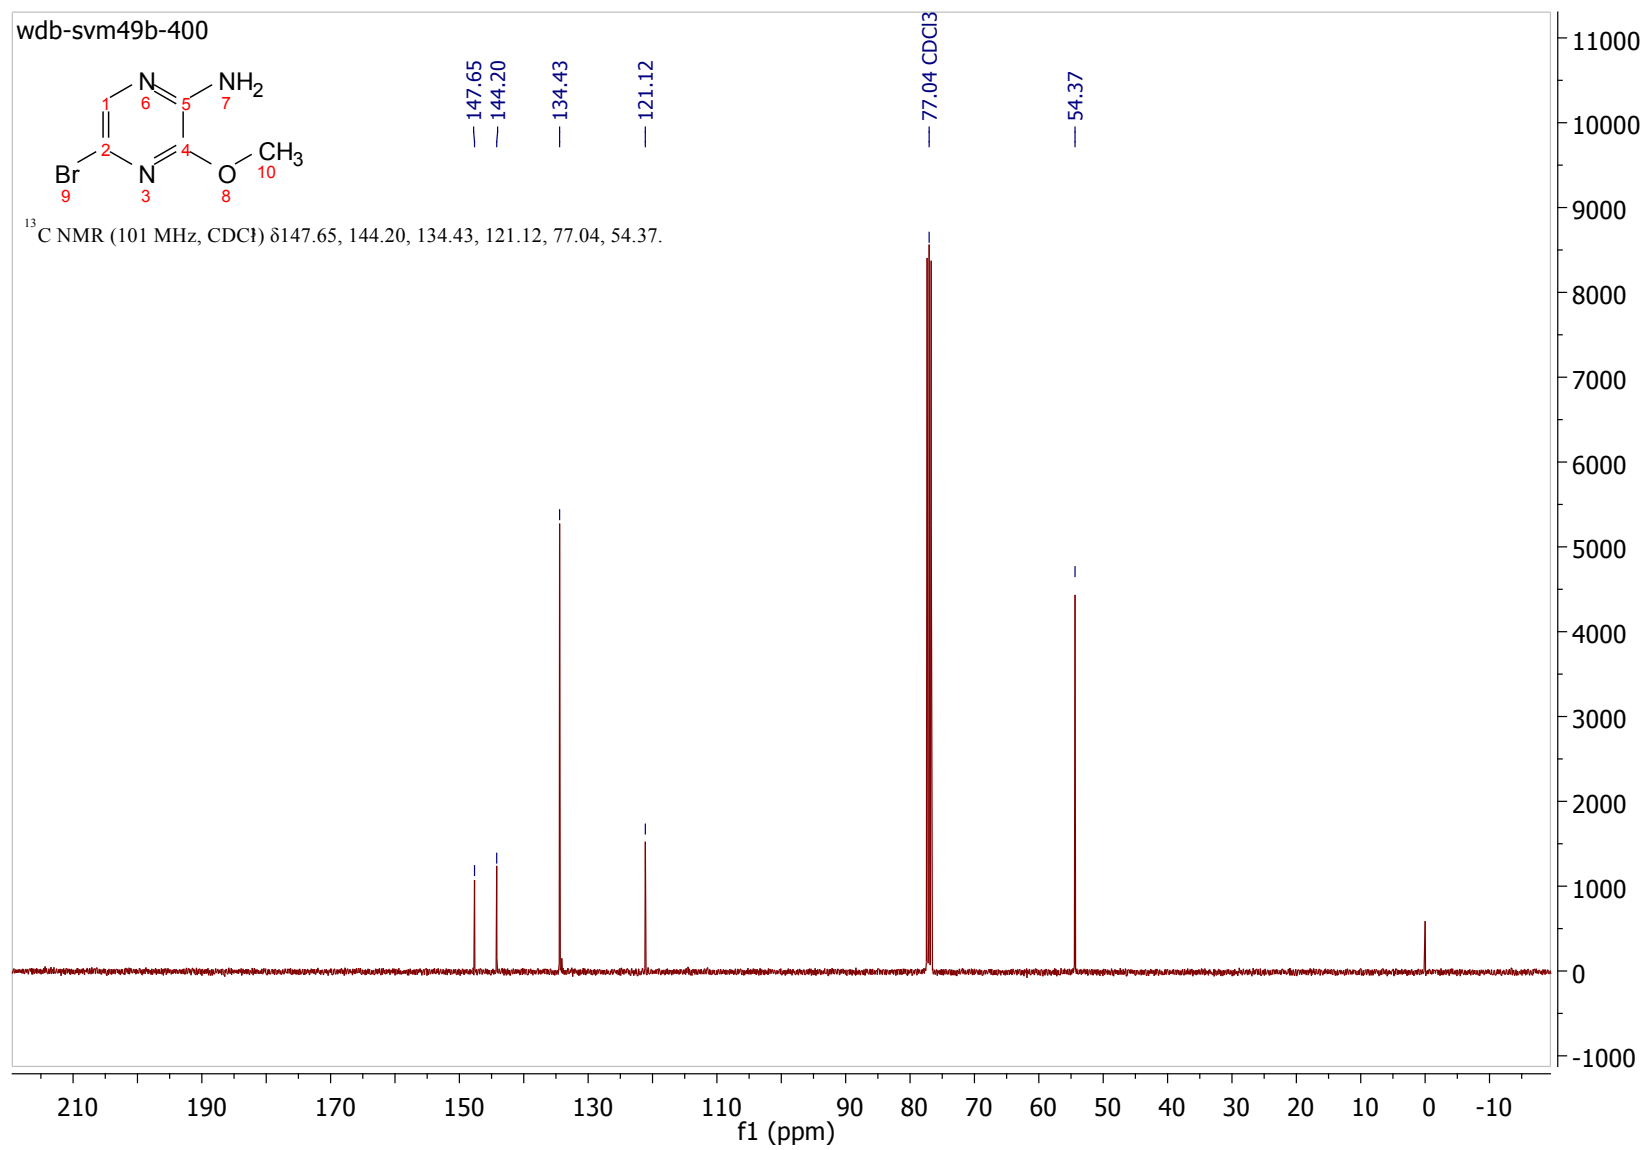

**1b**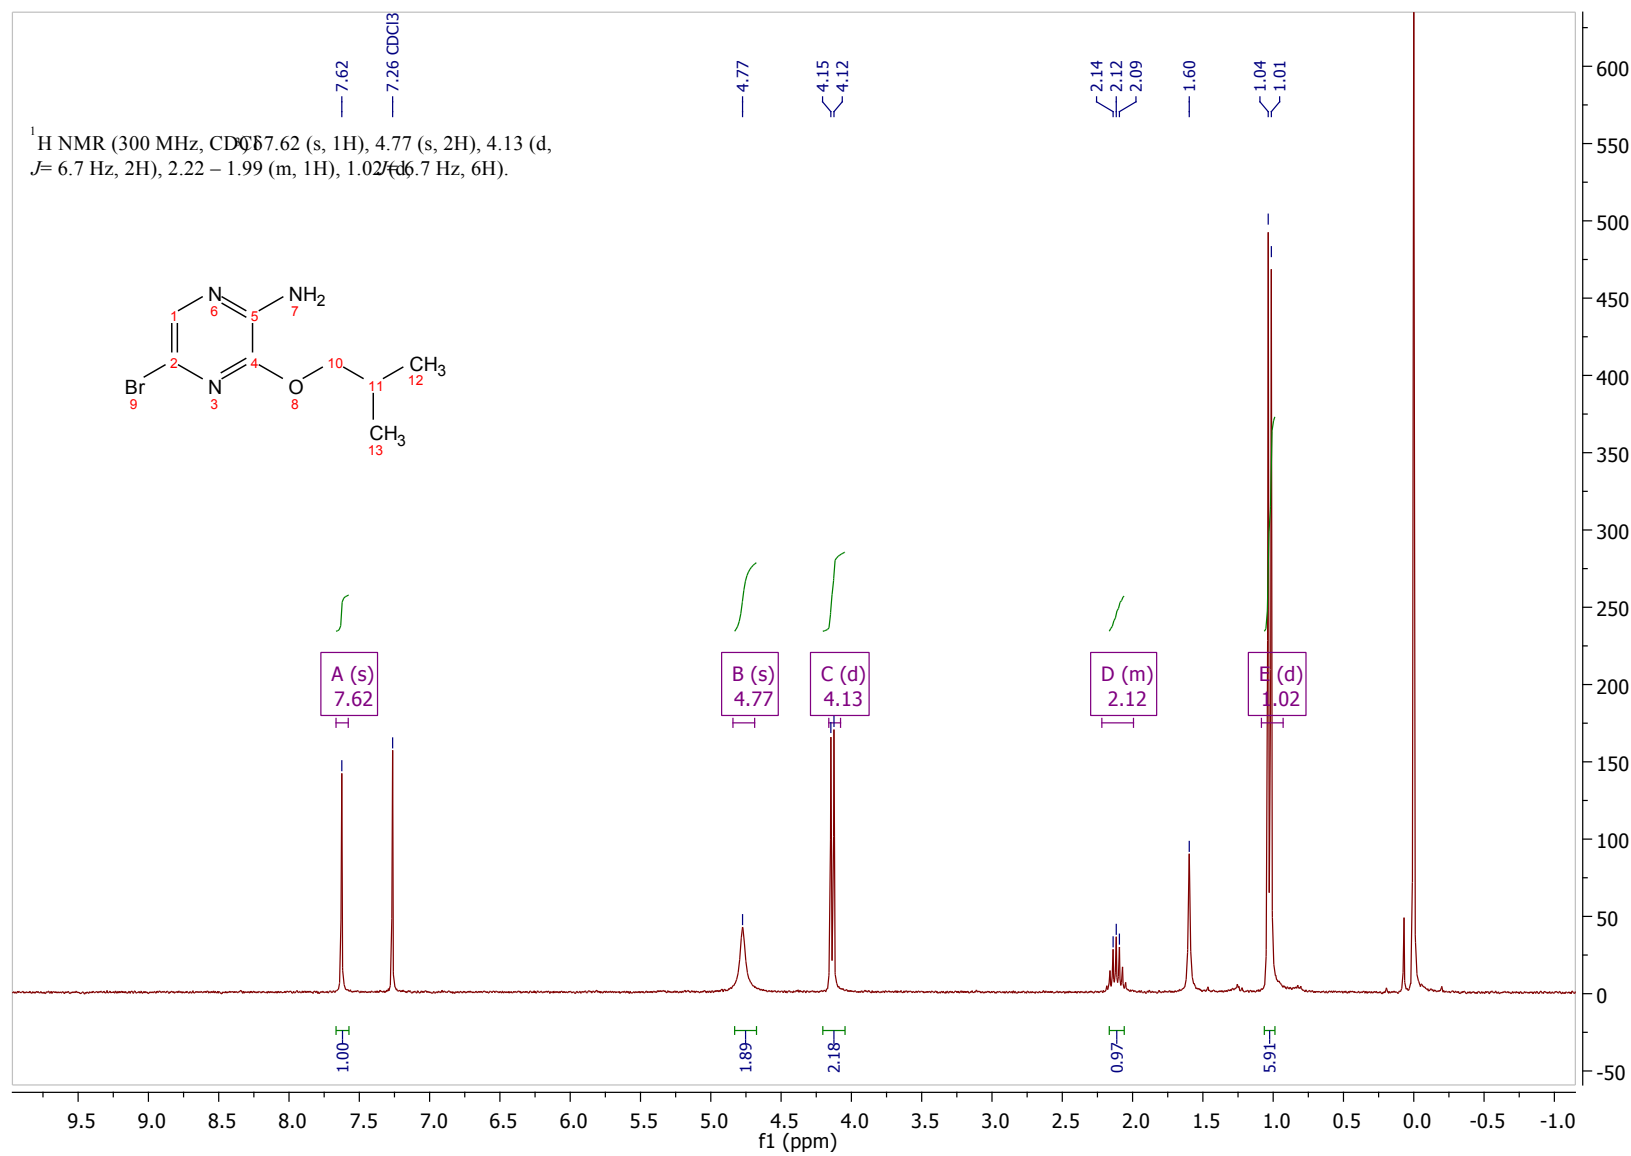

1b

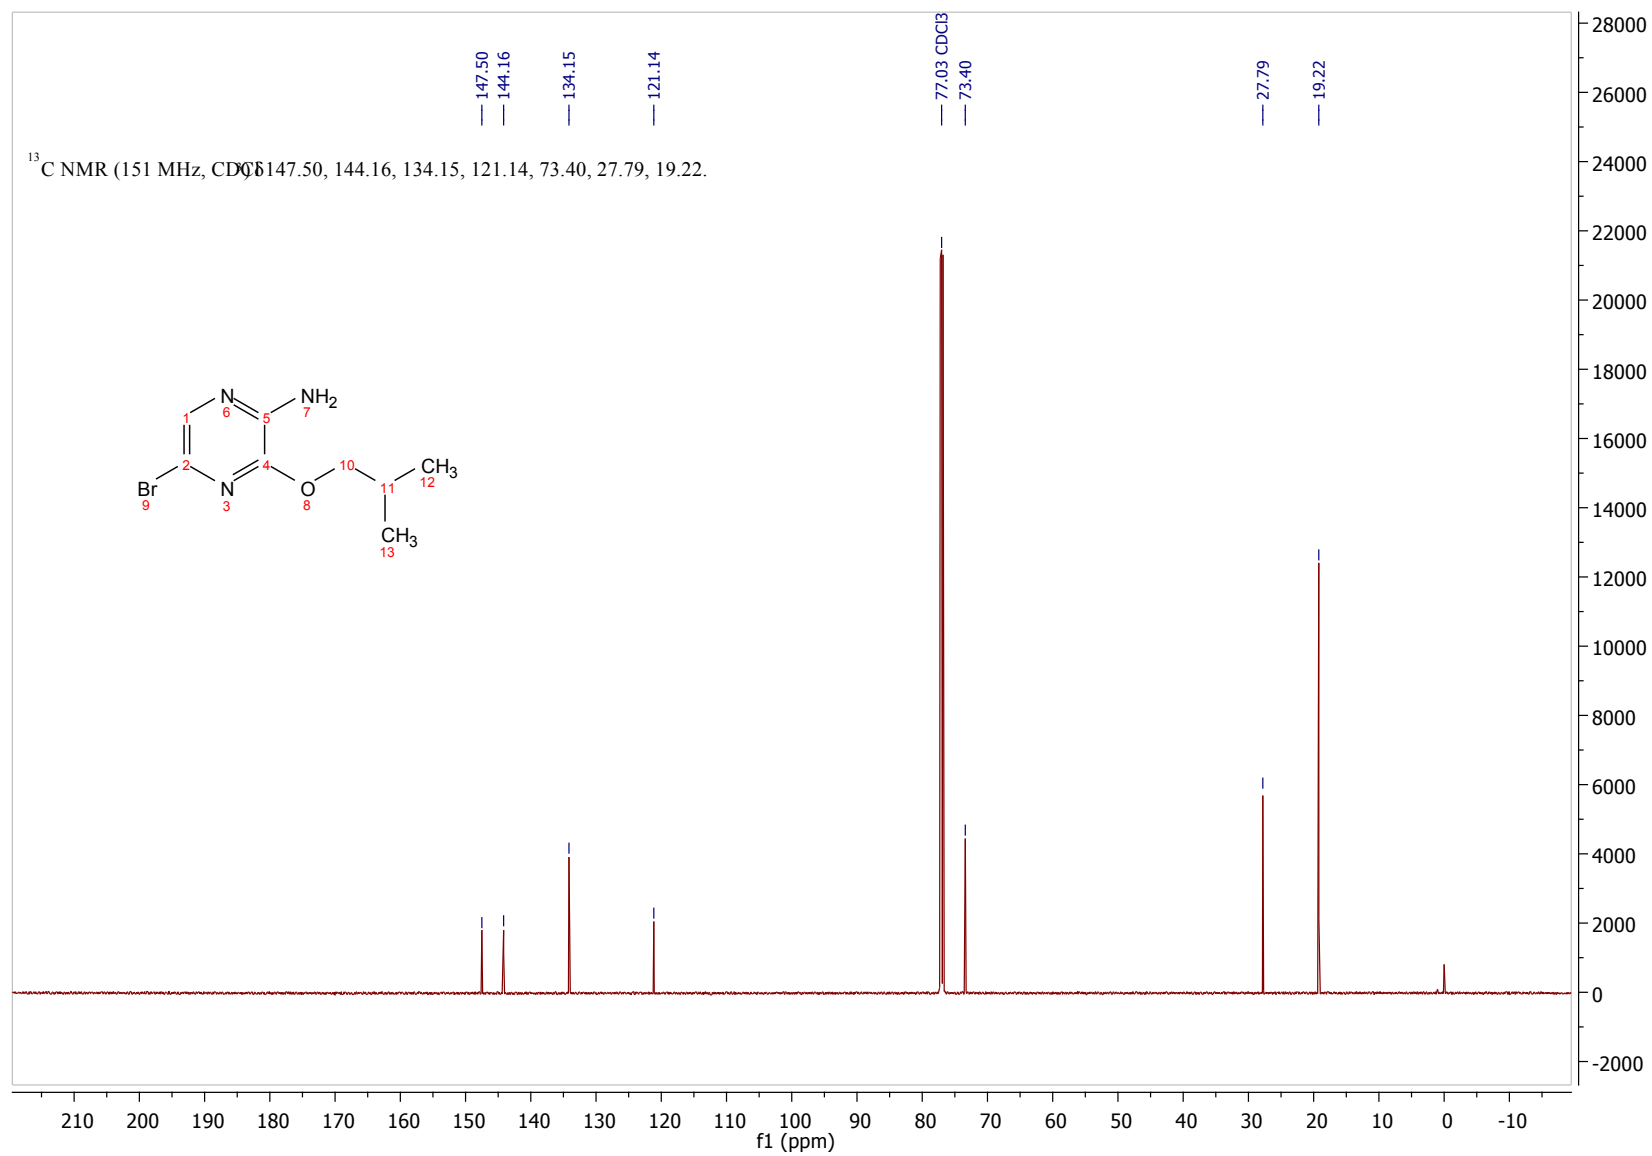

1c

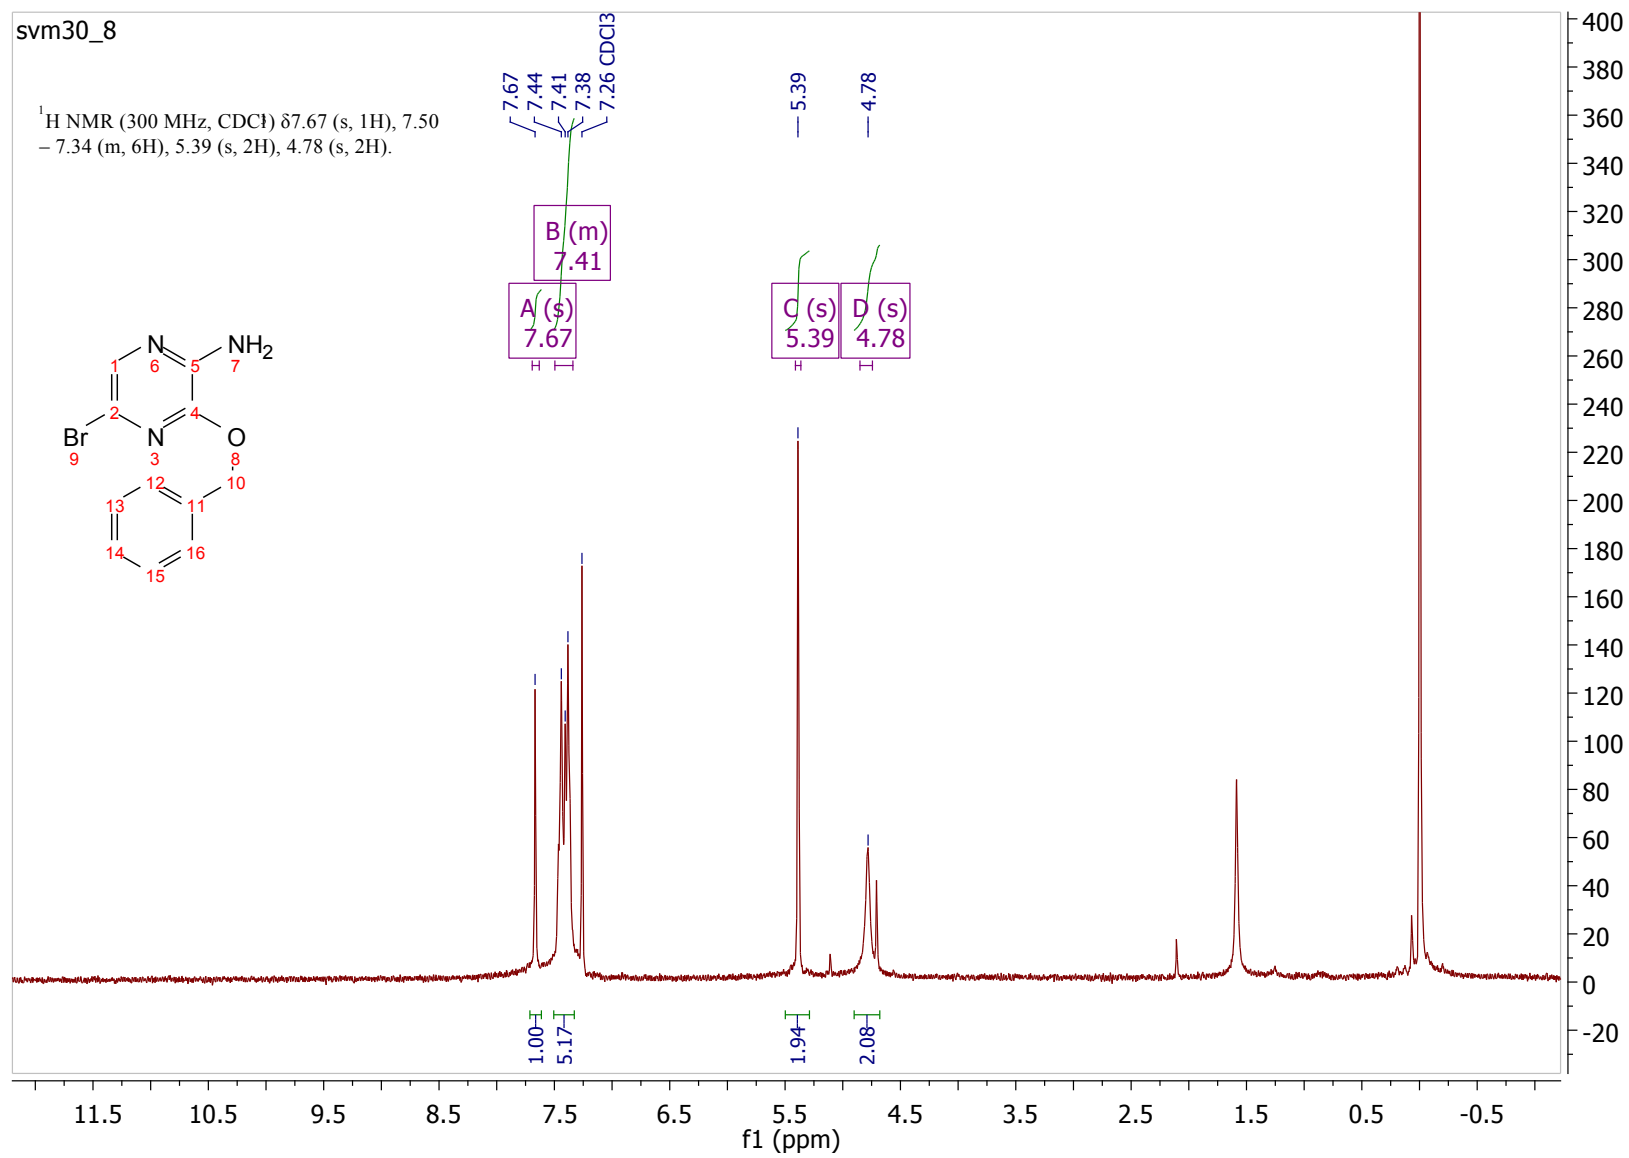

1c

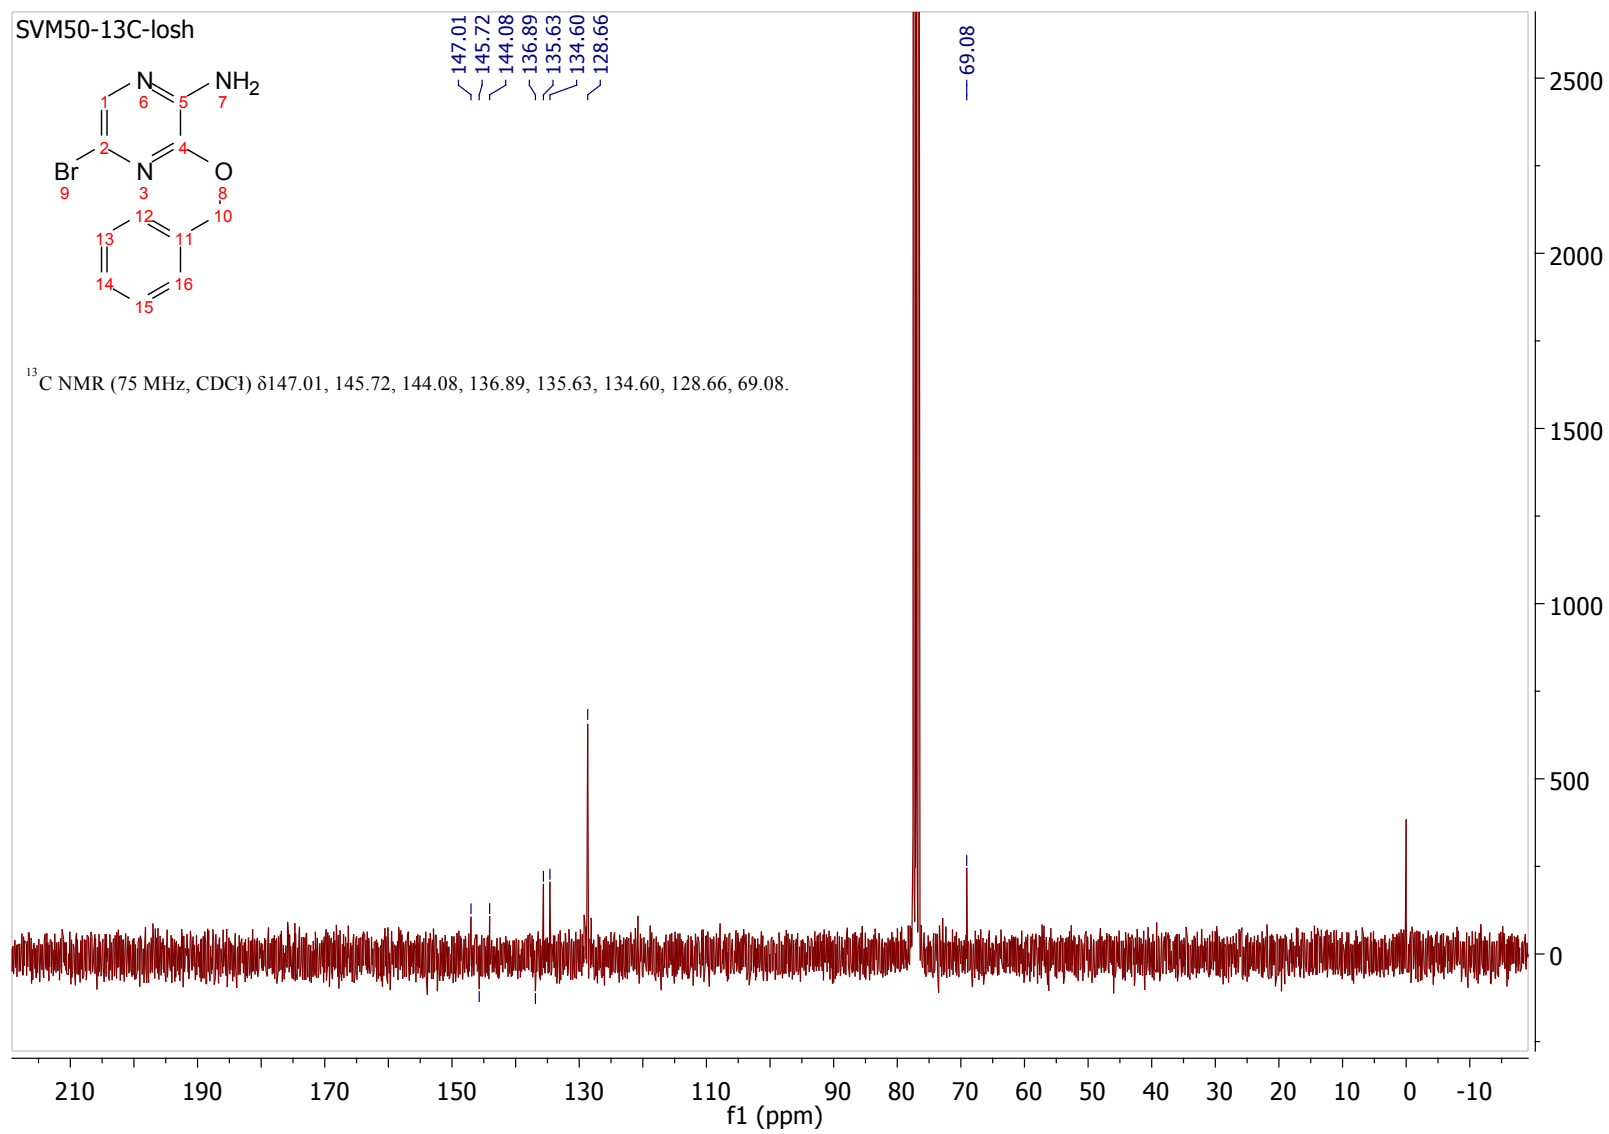

1d

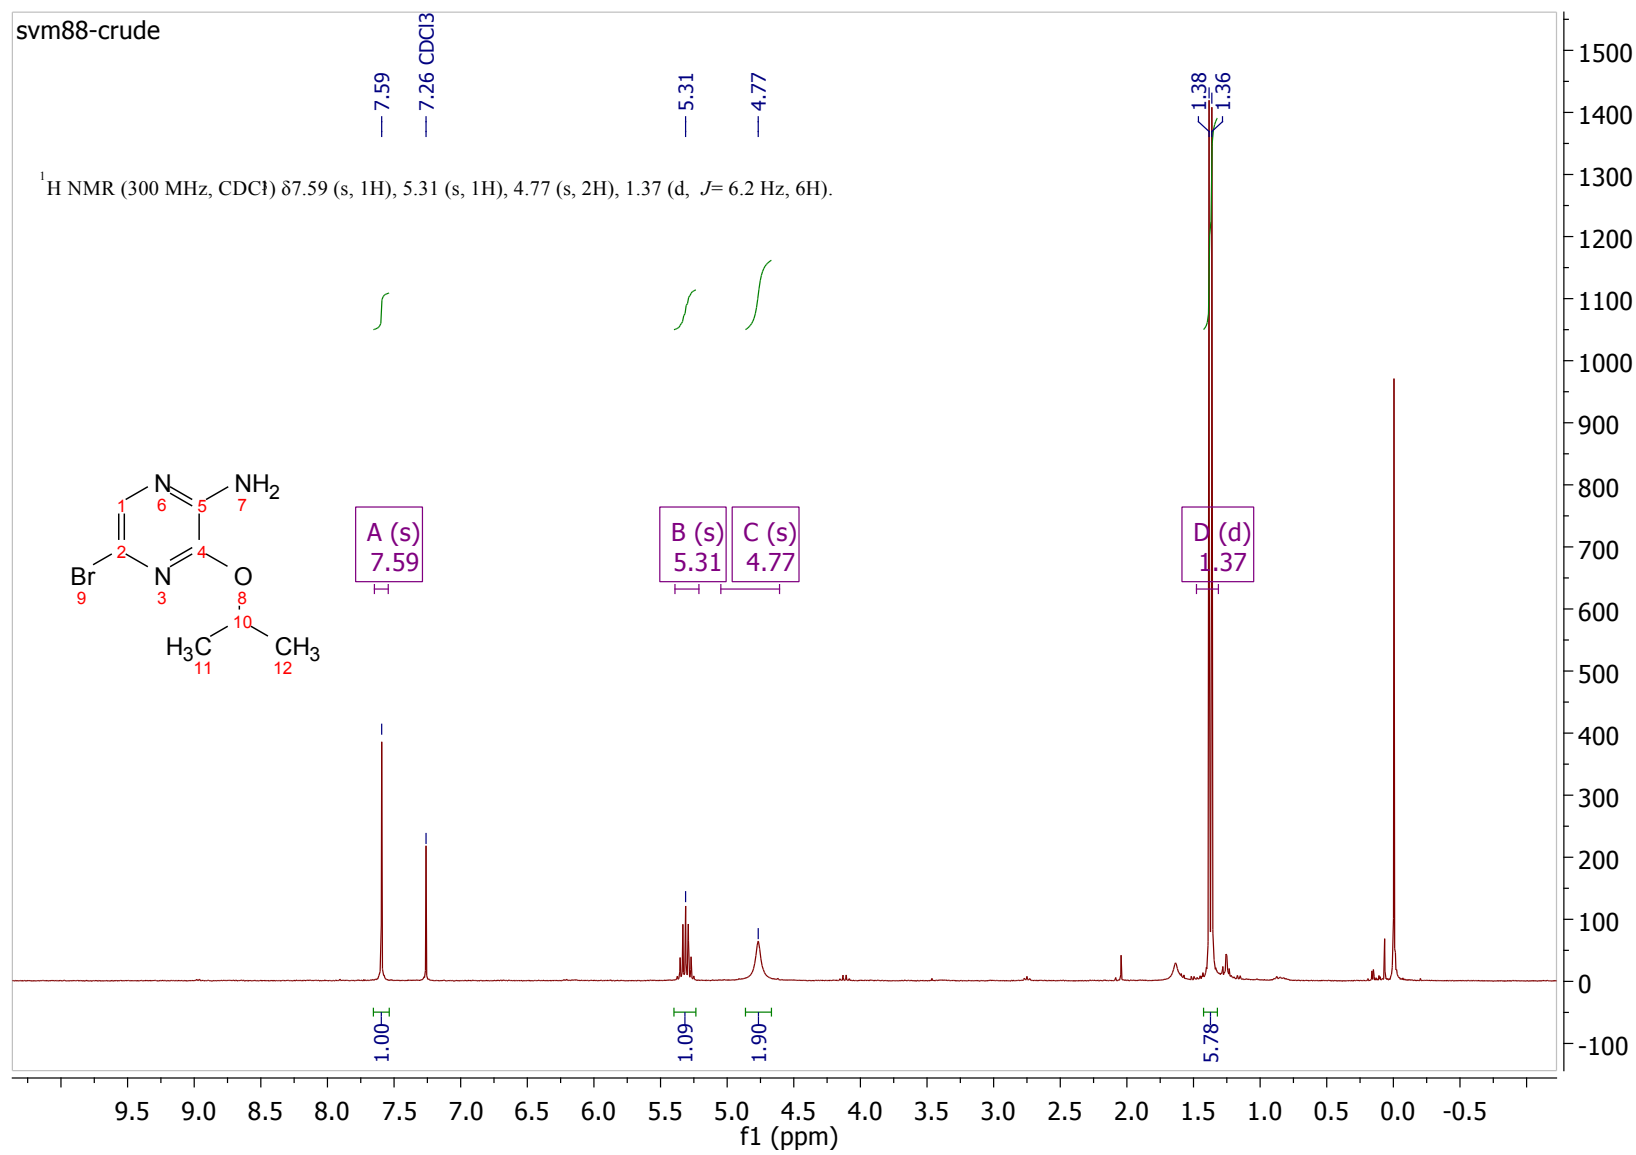

1d

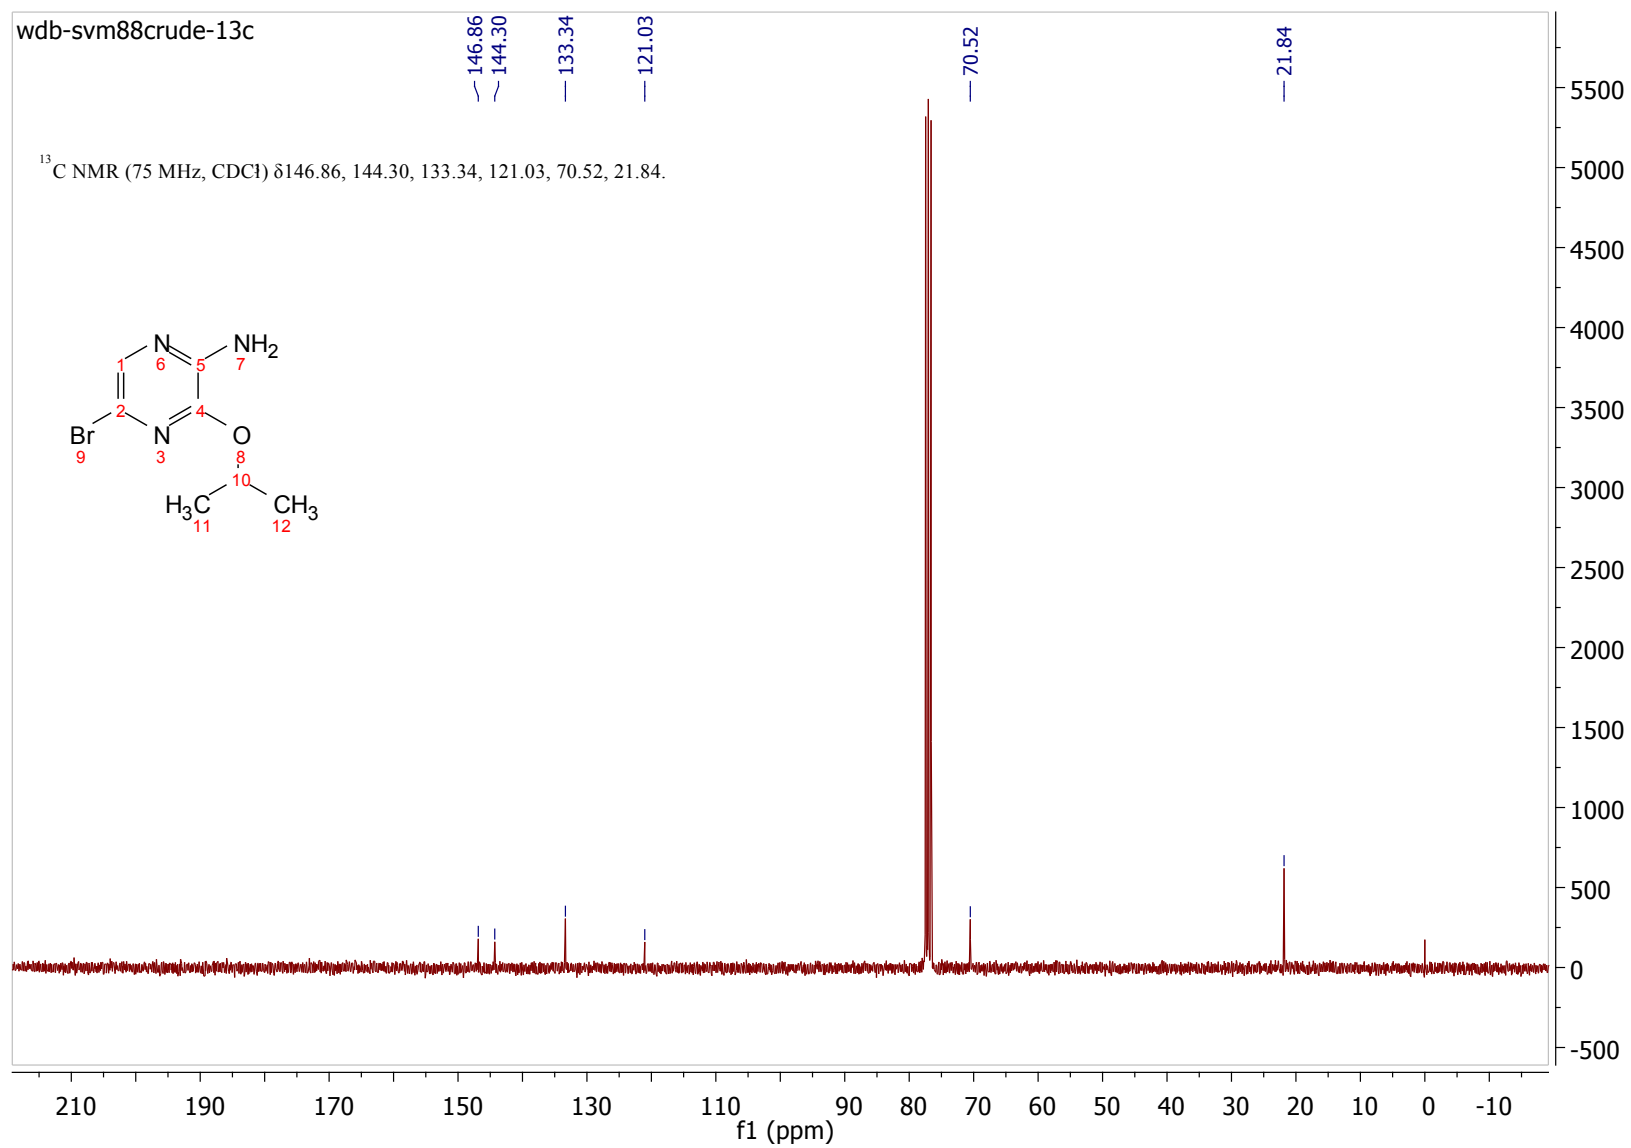

2a

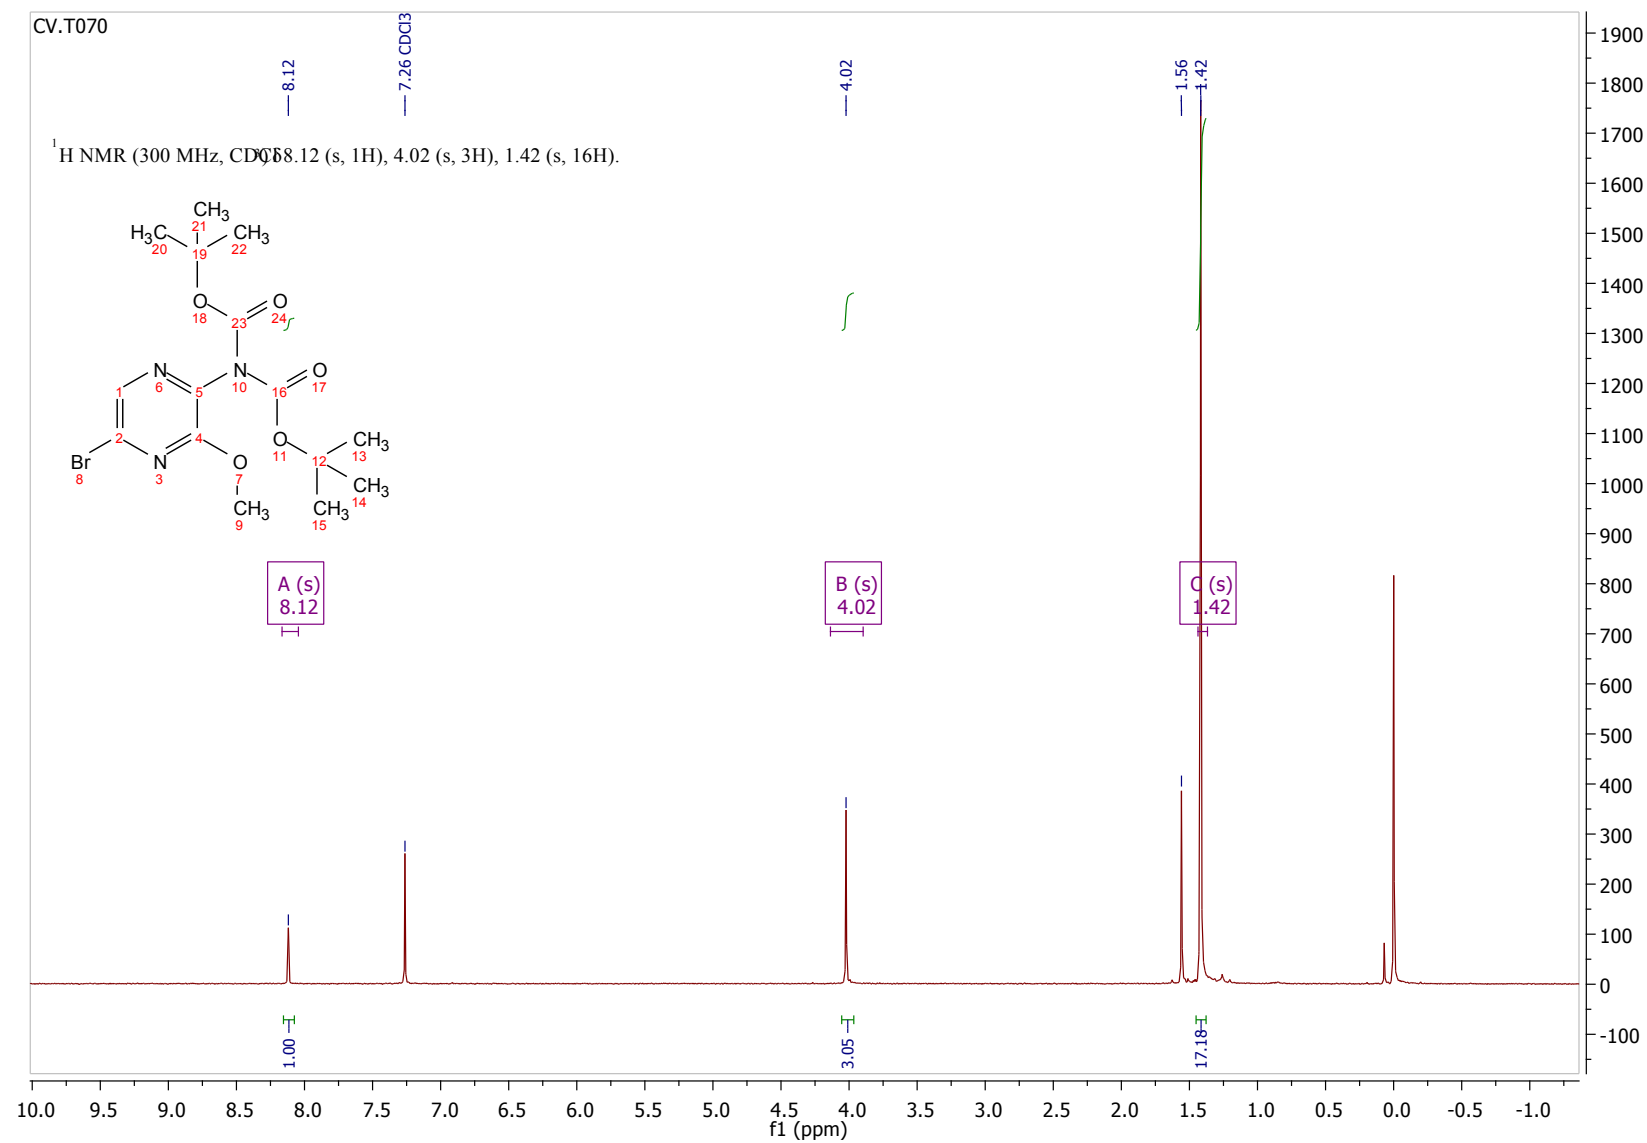



2a

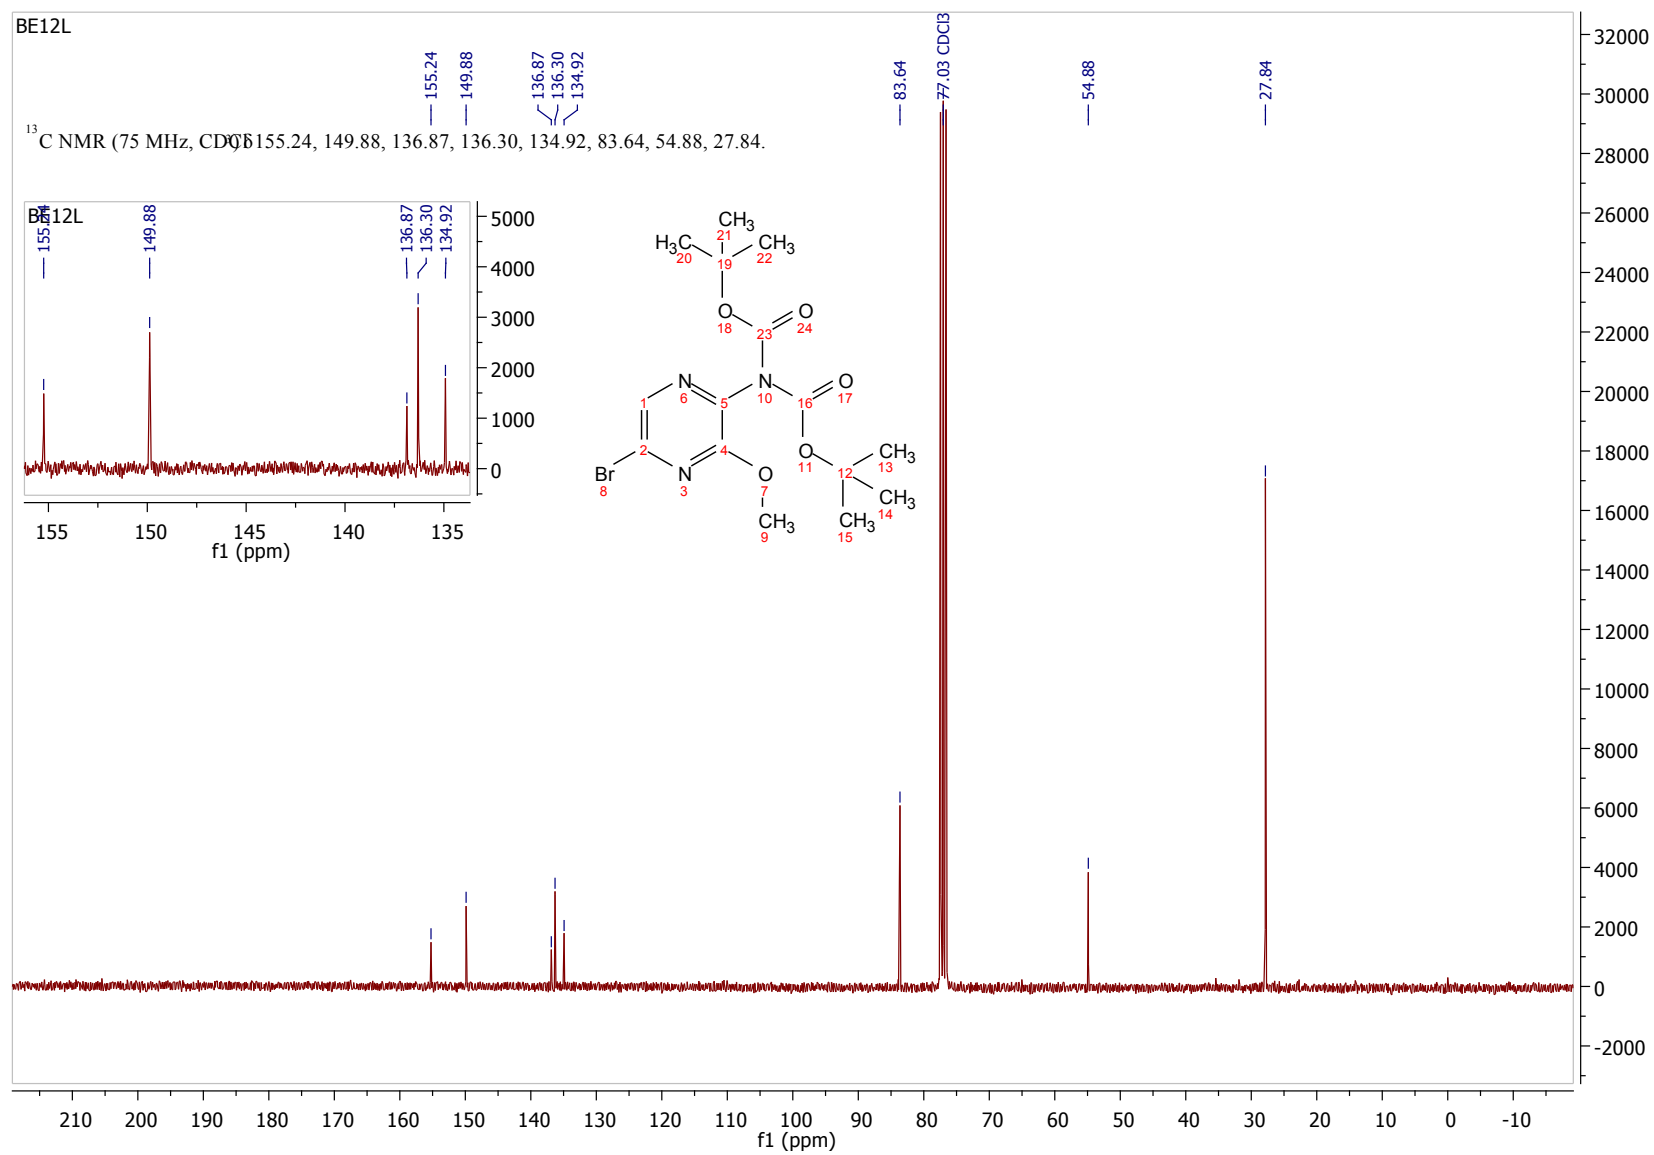

2b

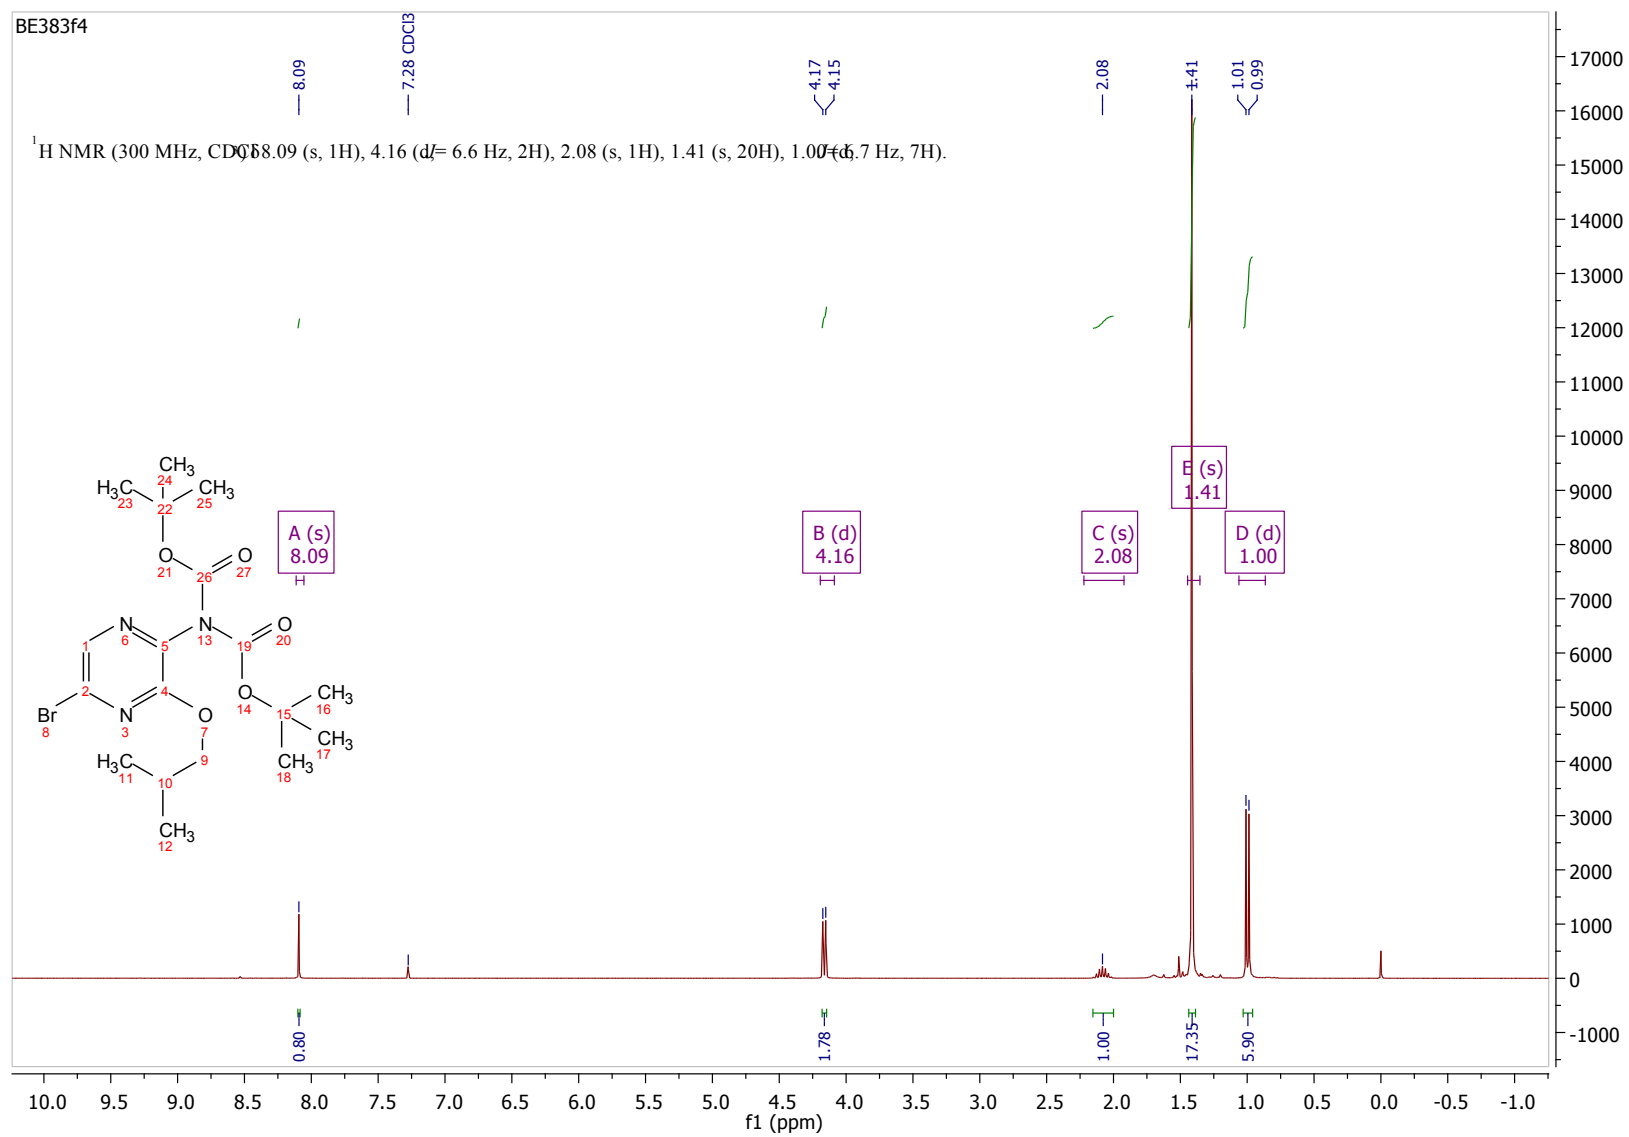

2b

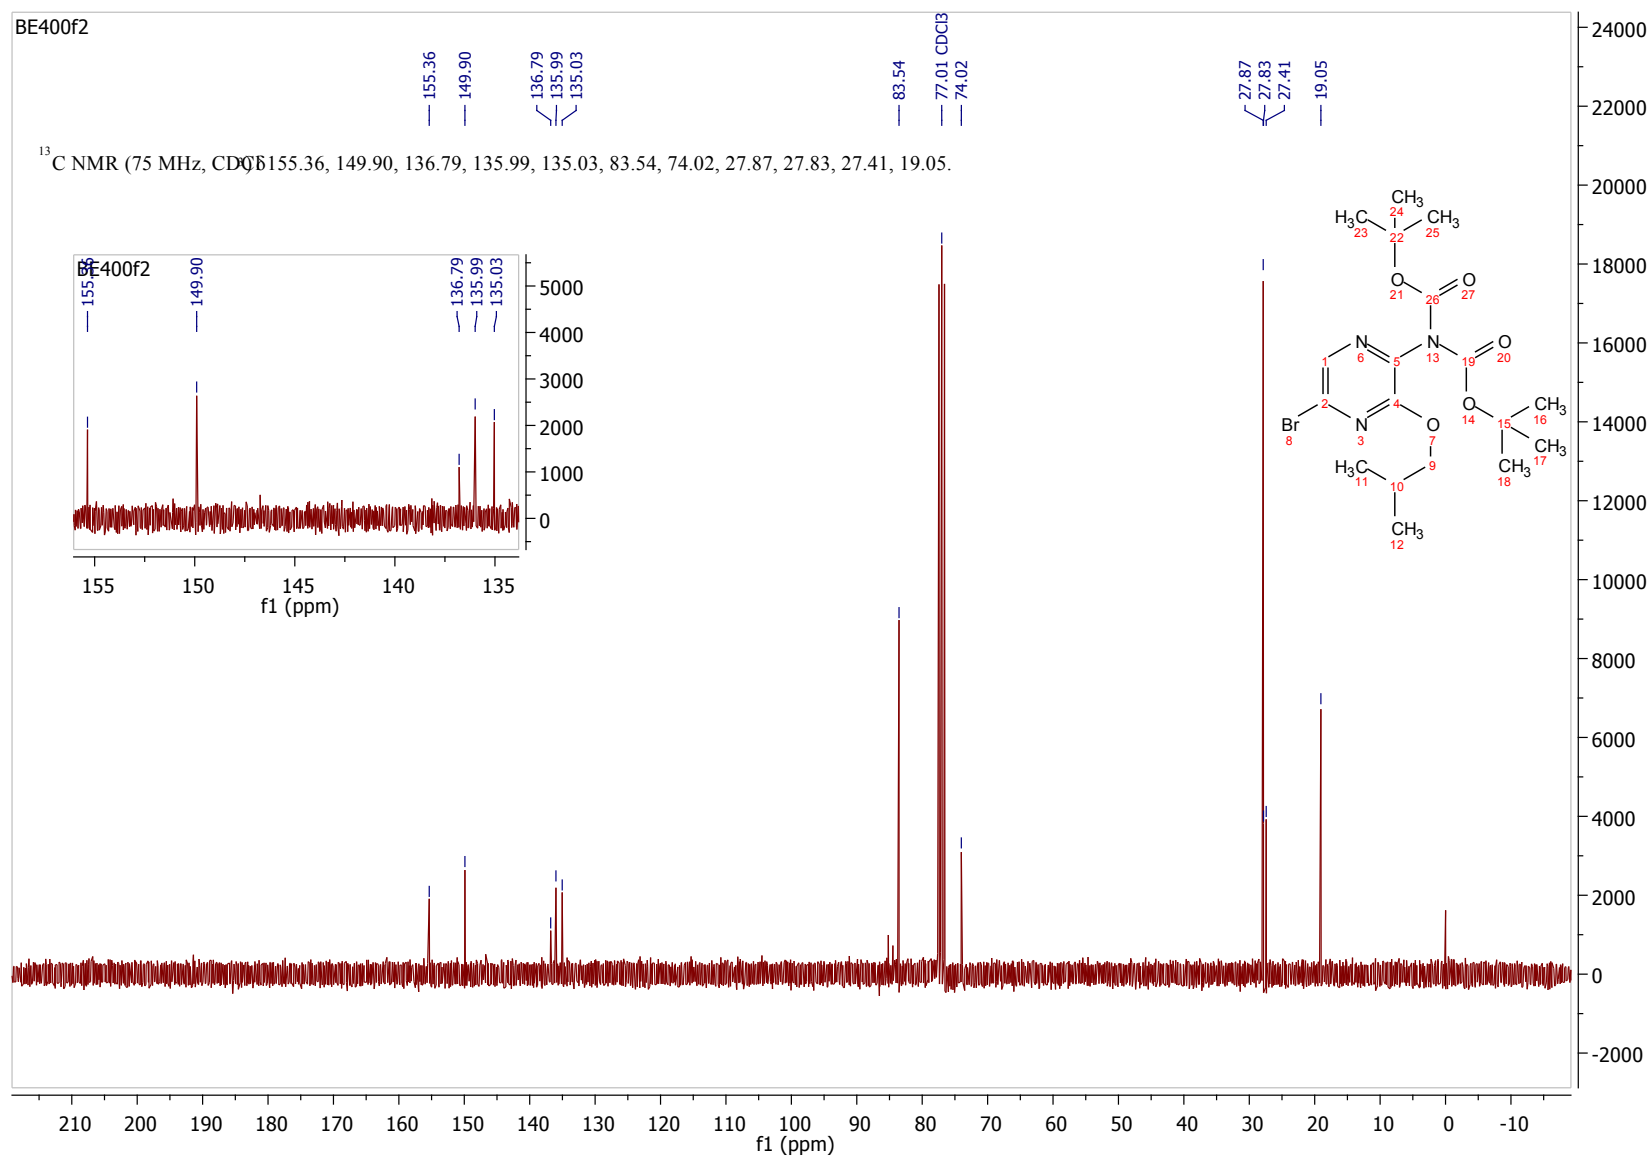

2c

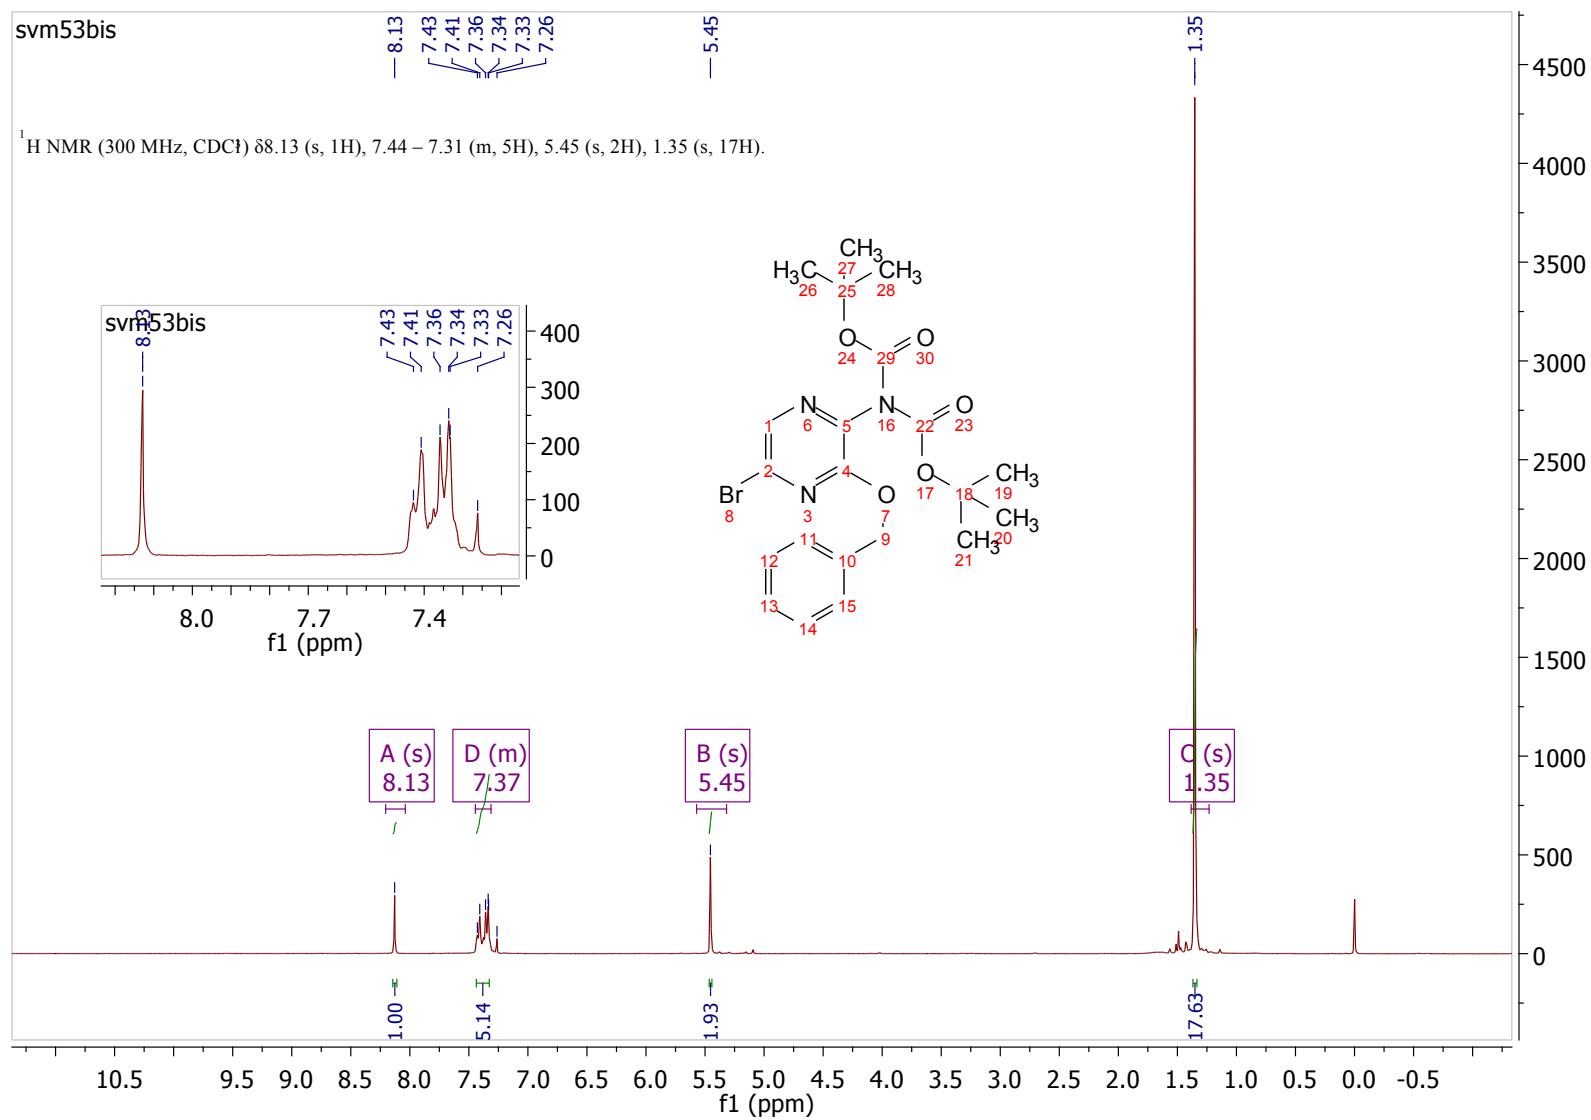

2c

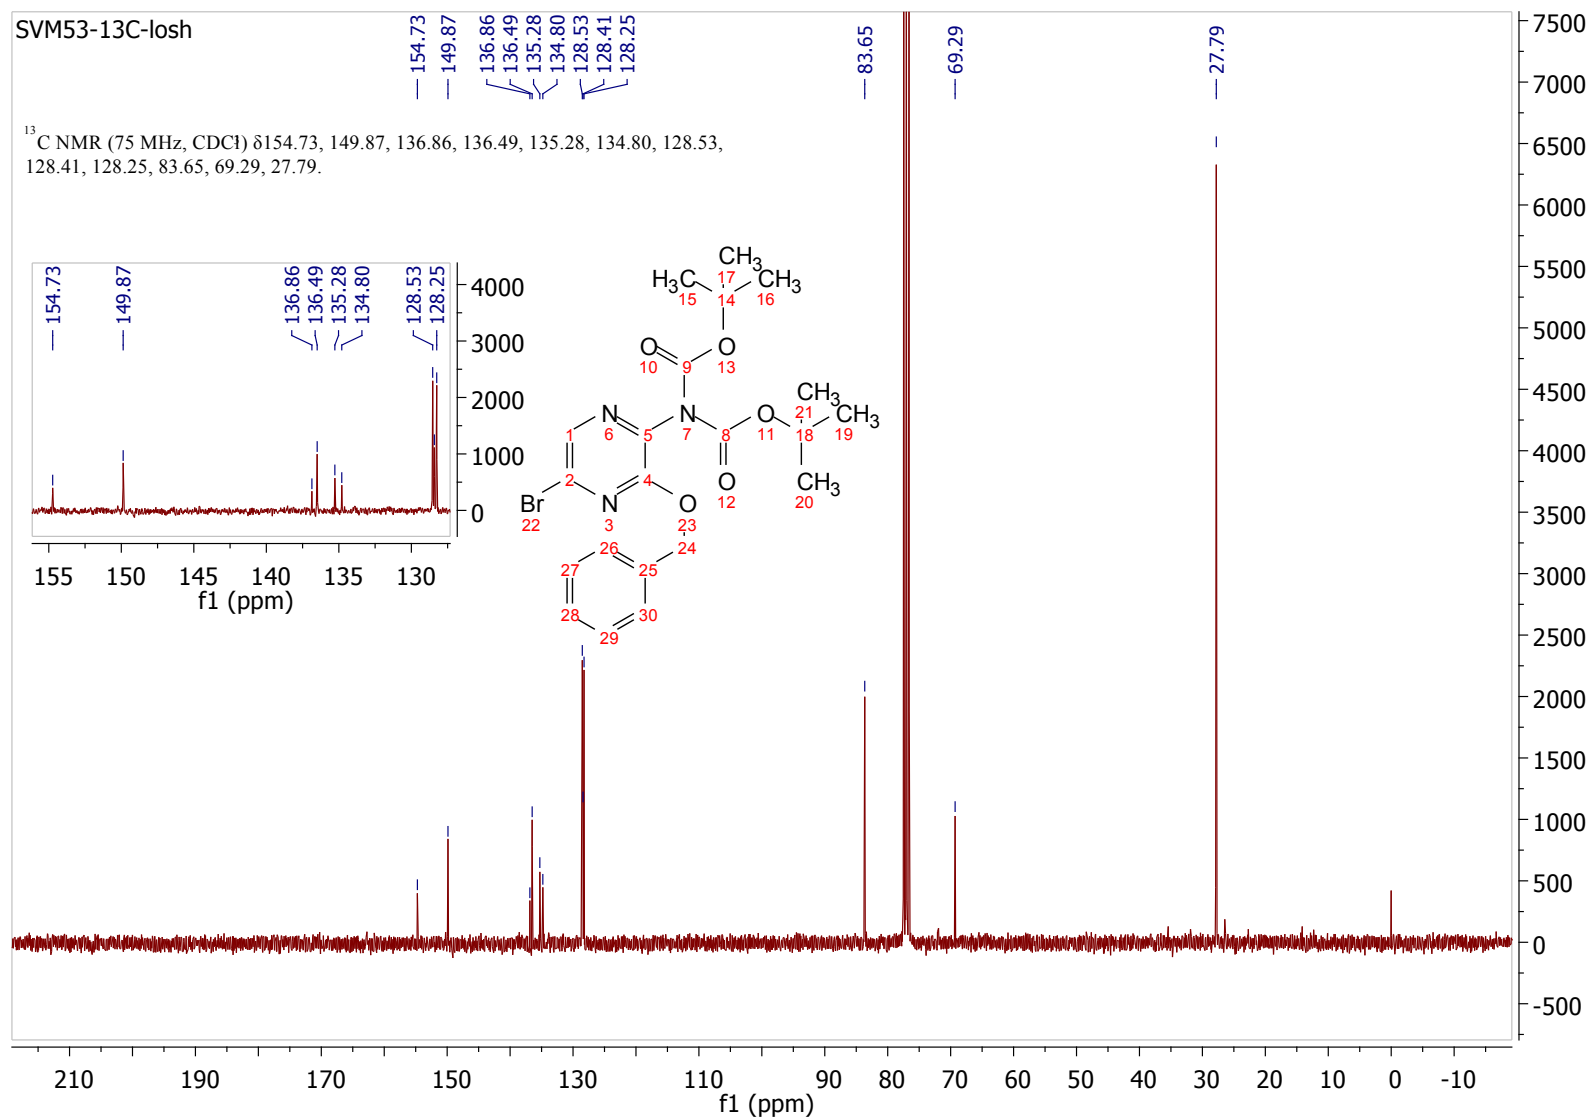

2d

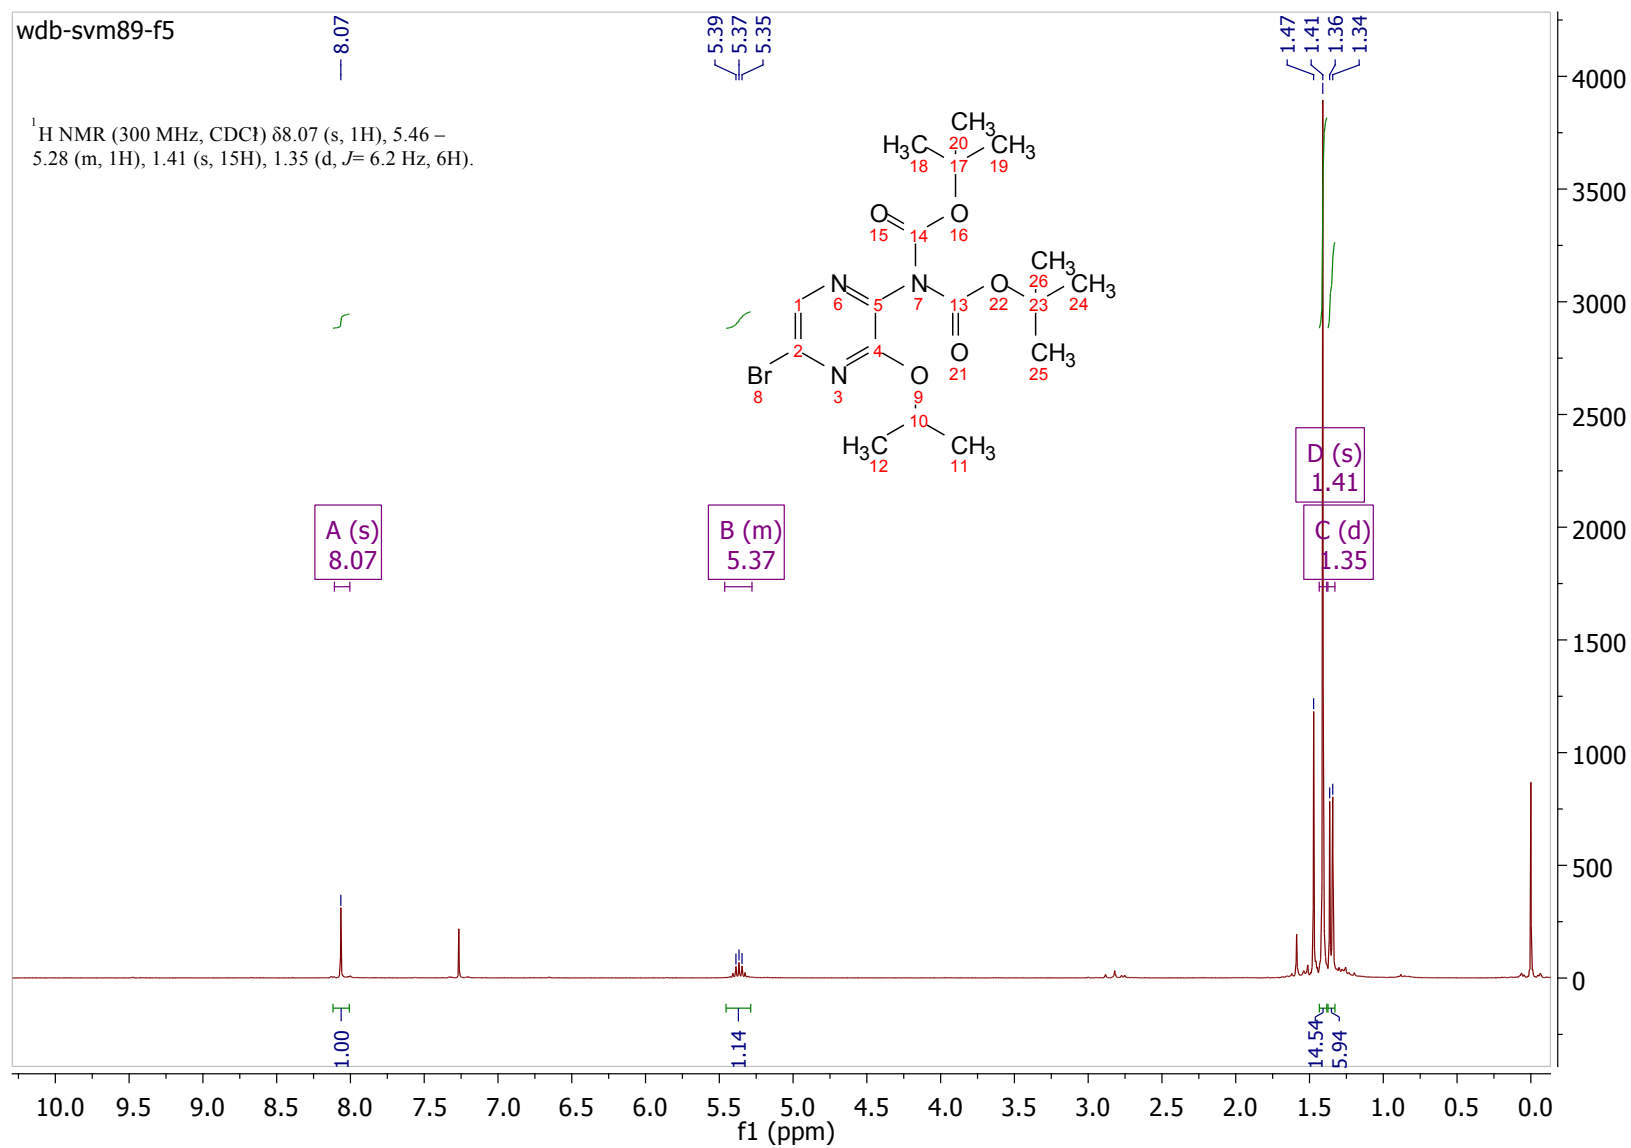

2d

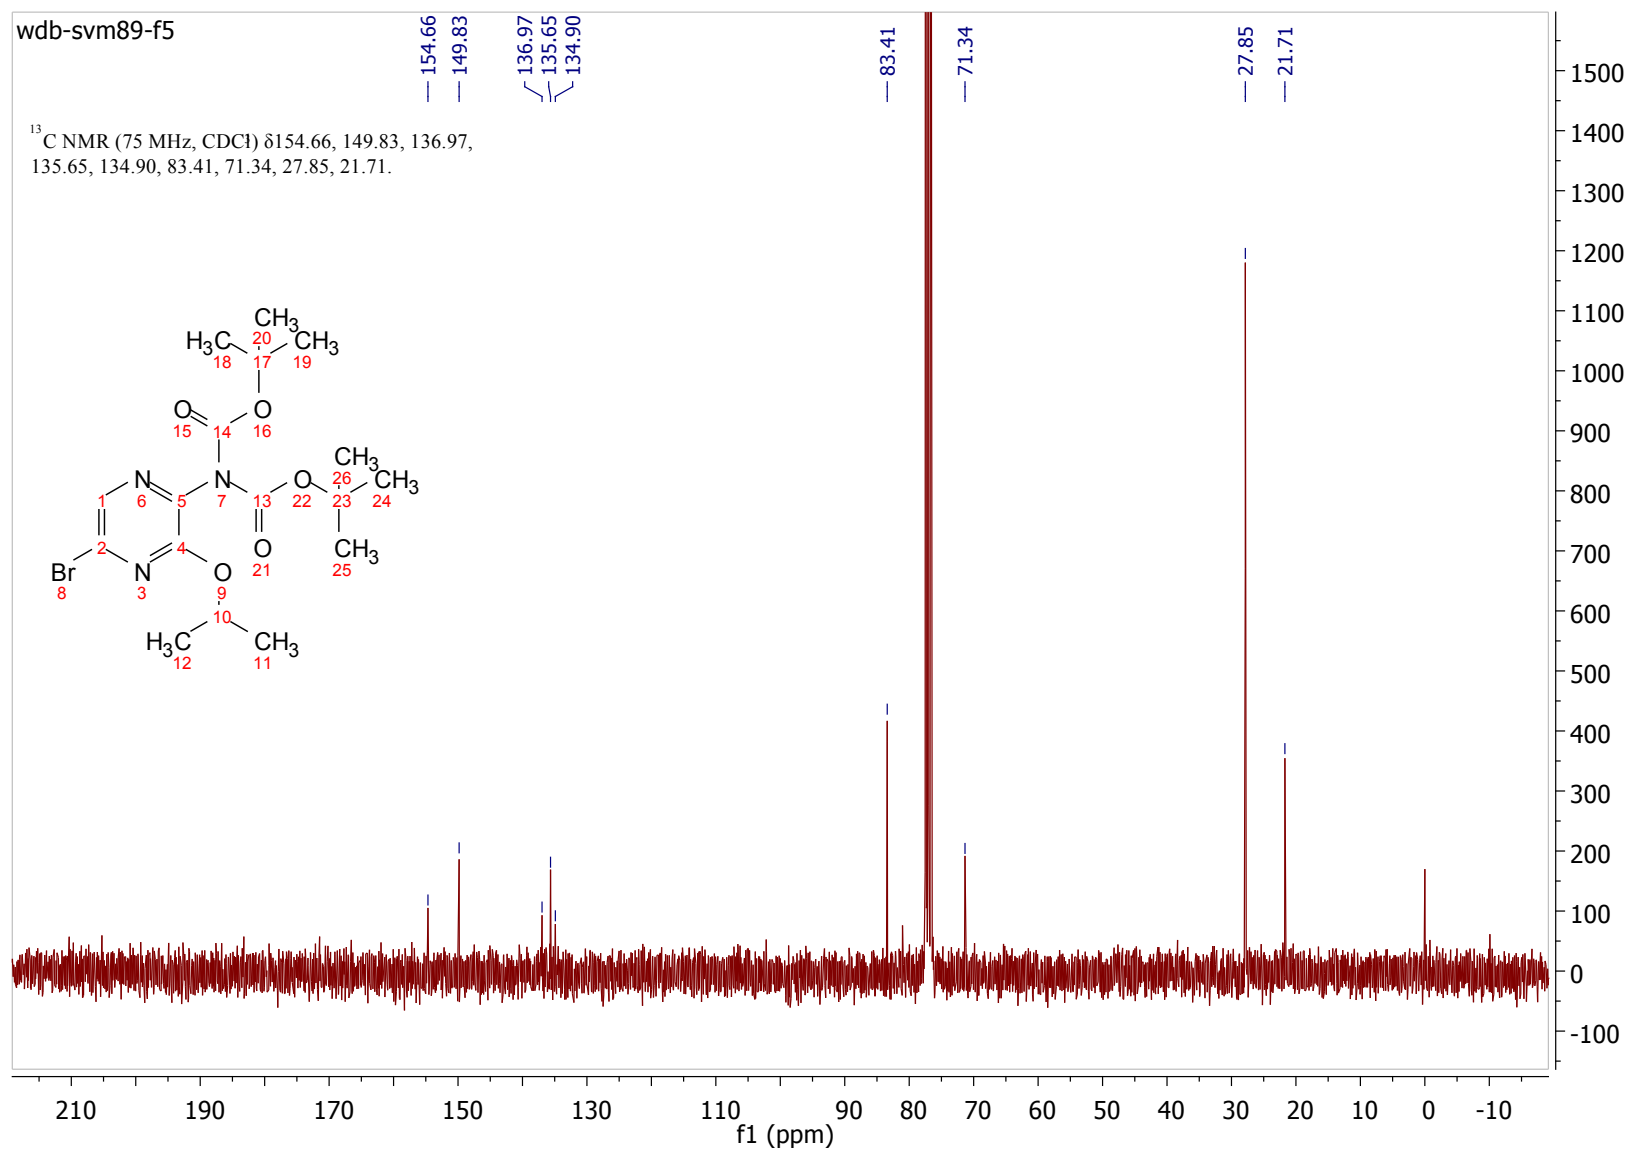

3a

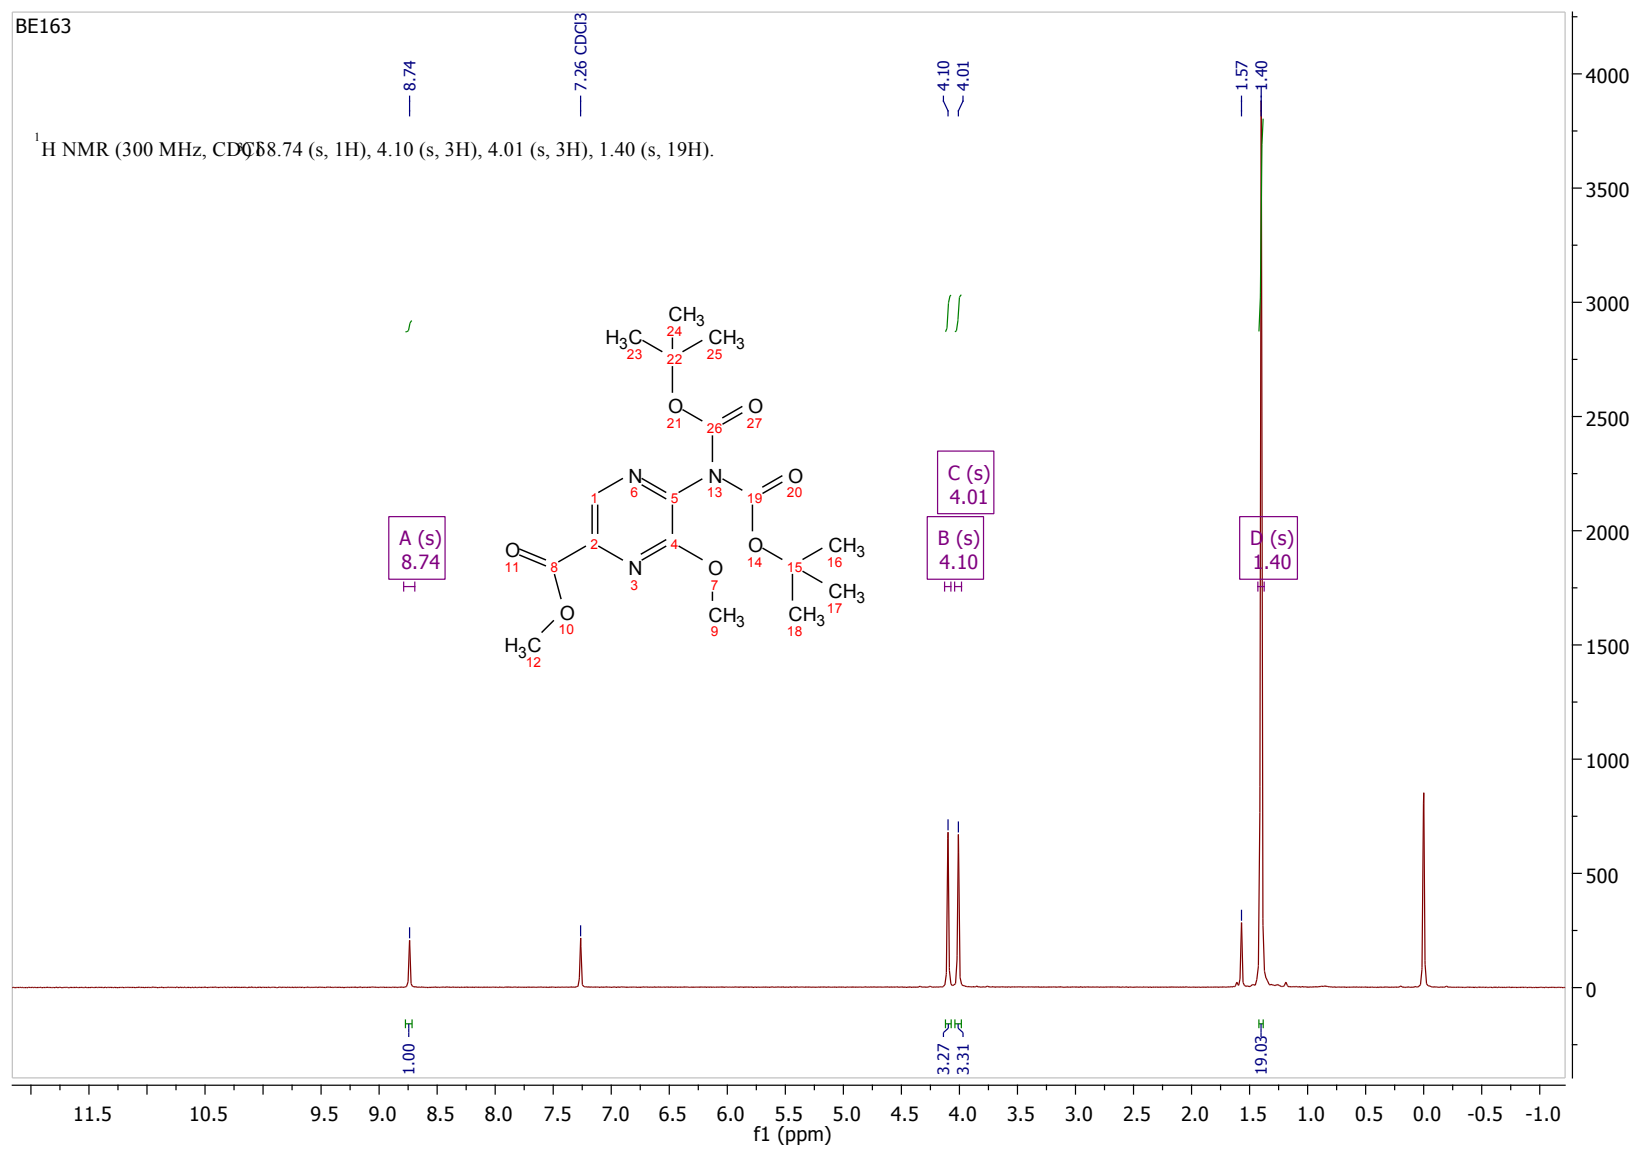



3a

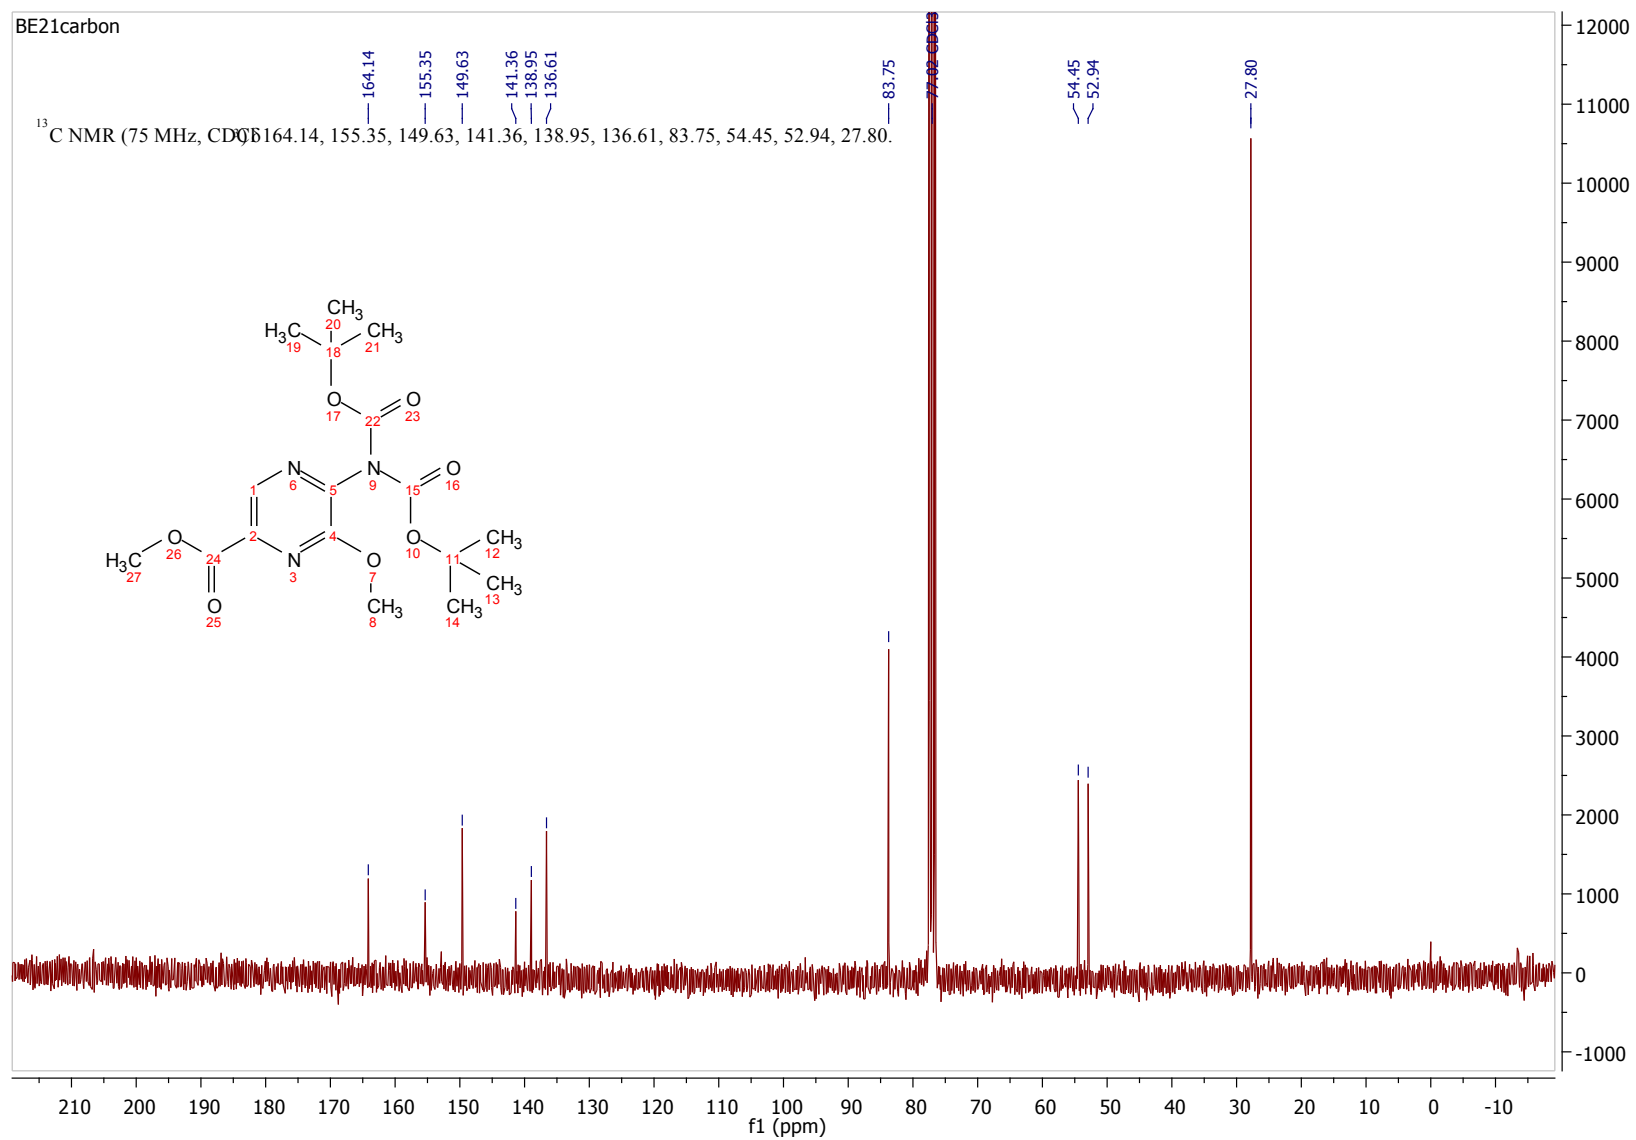

3b

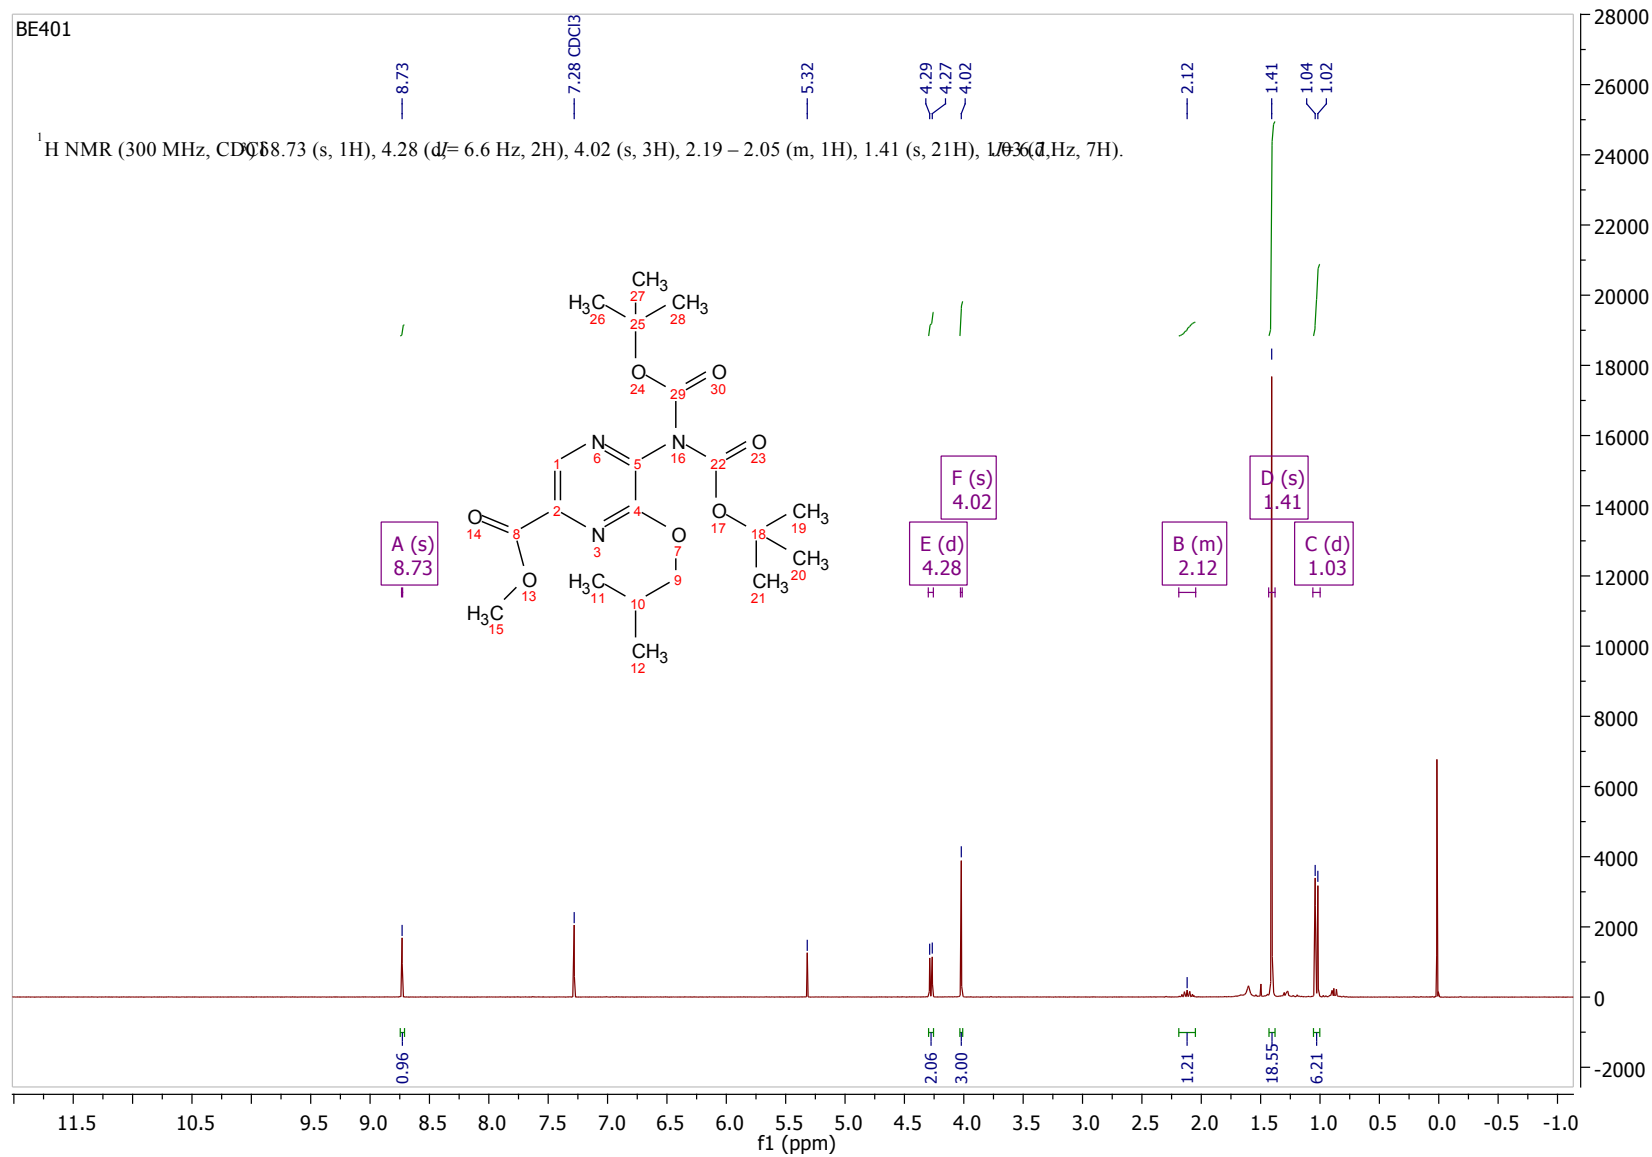

3b

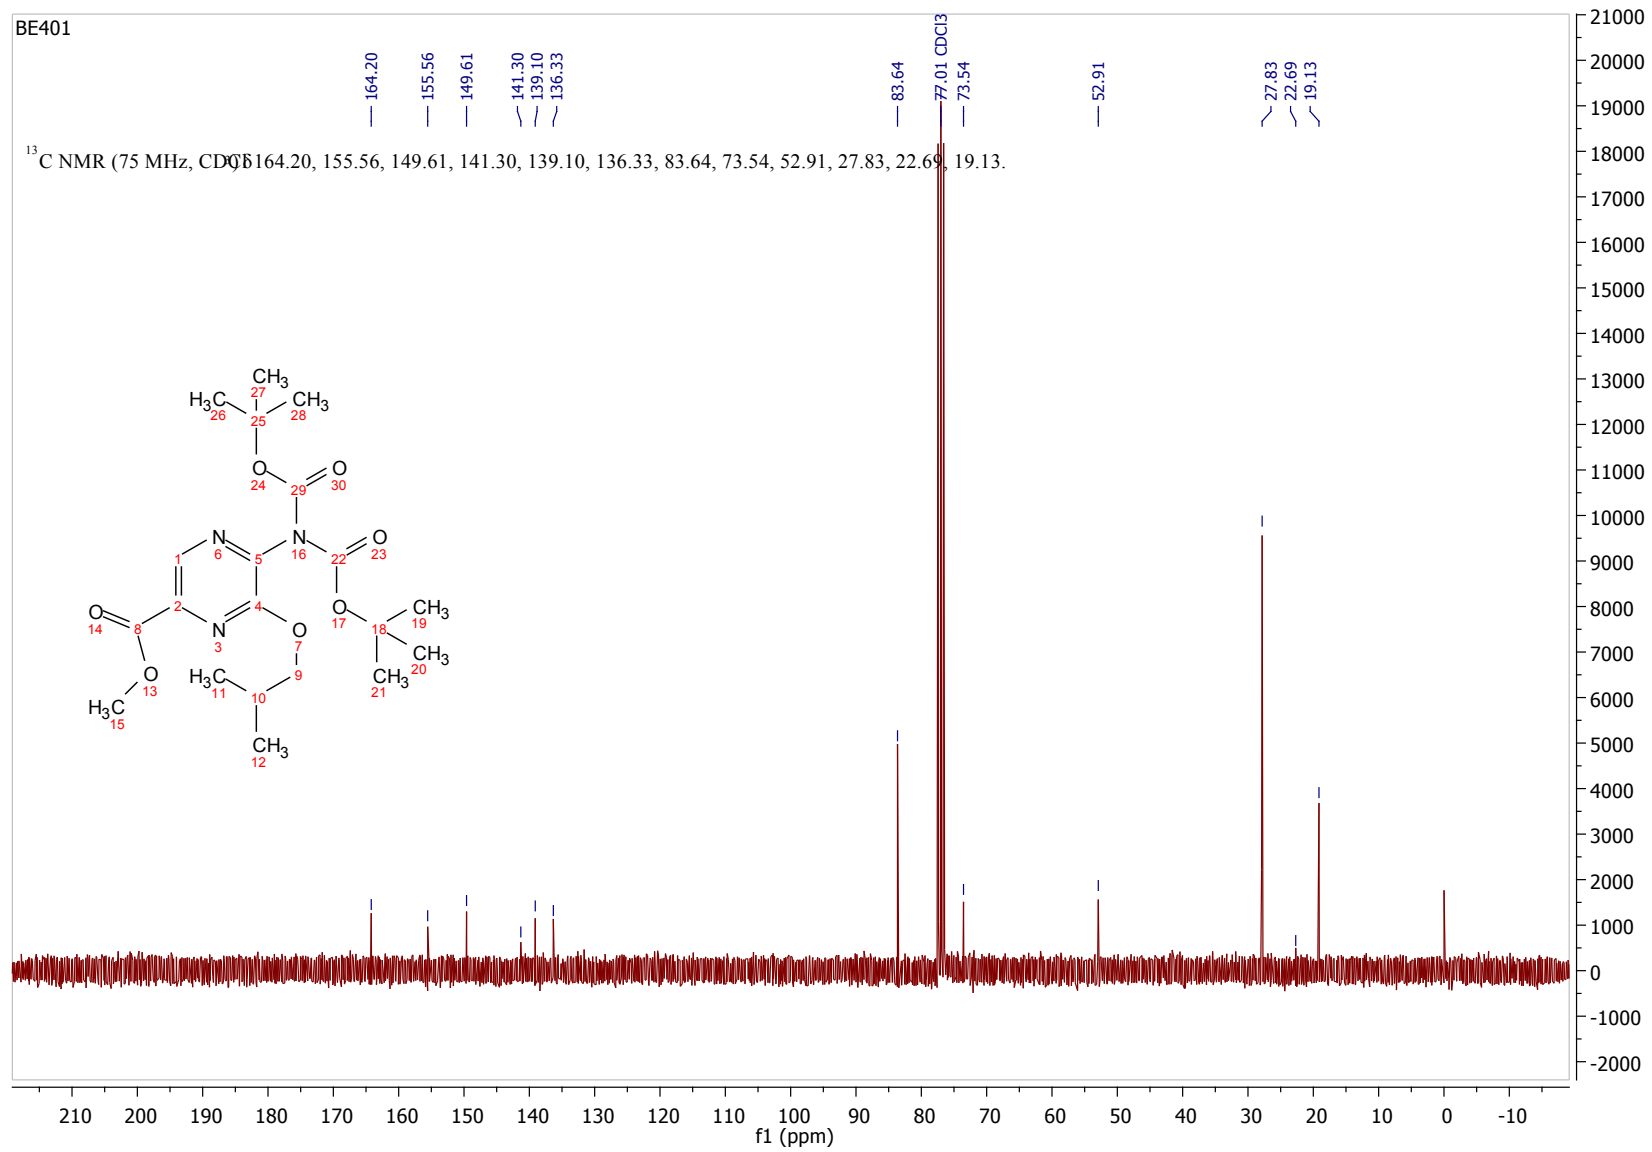

4a

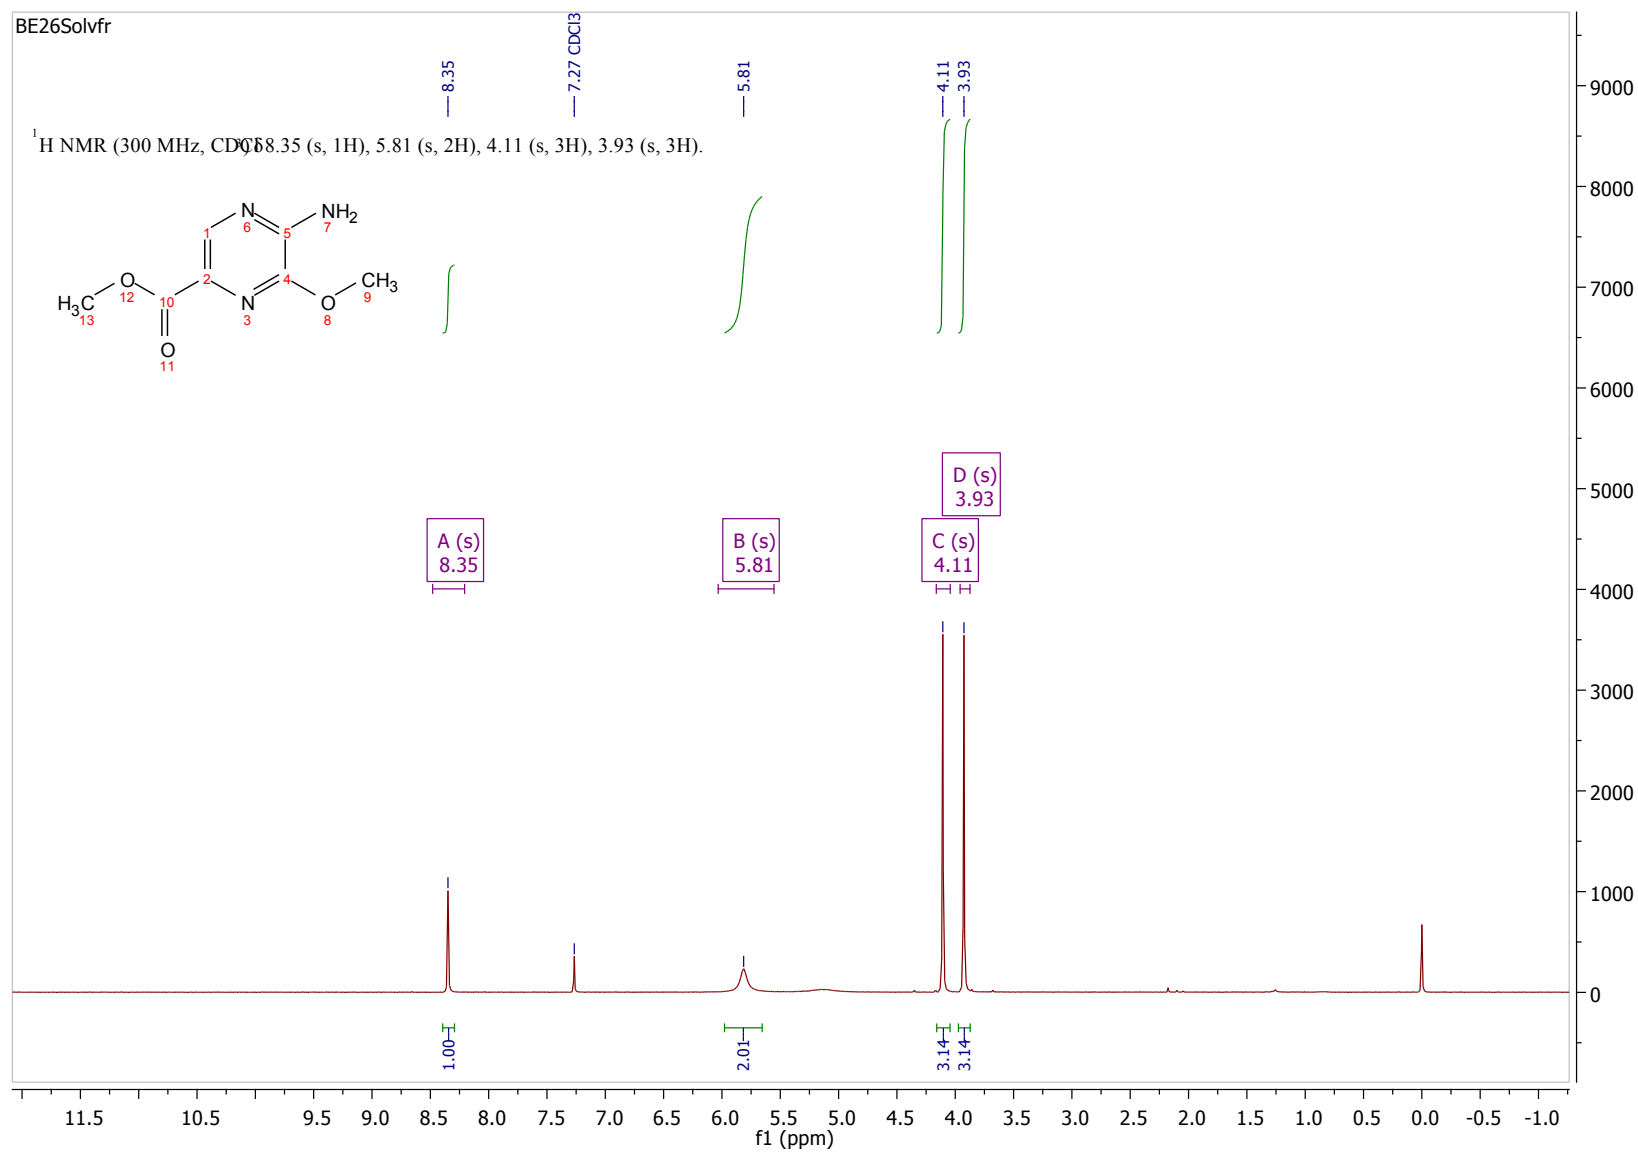

4a

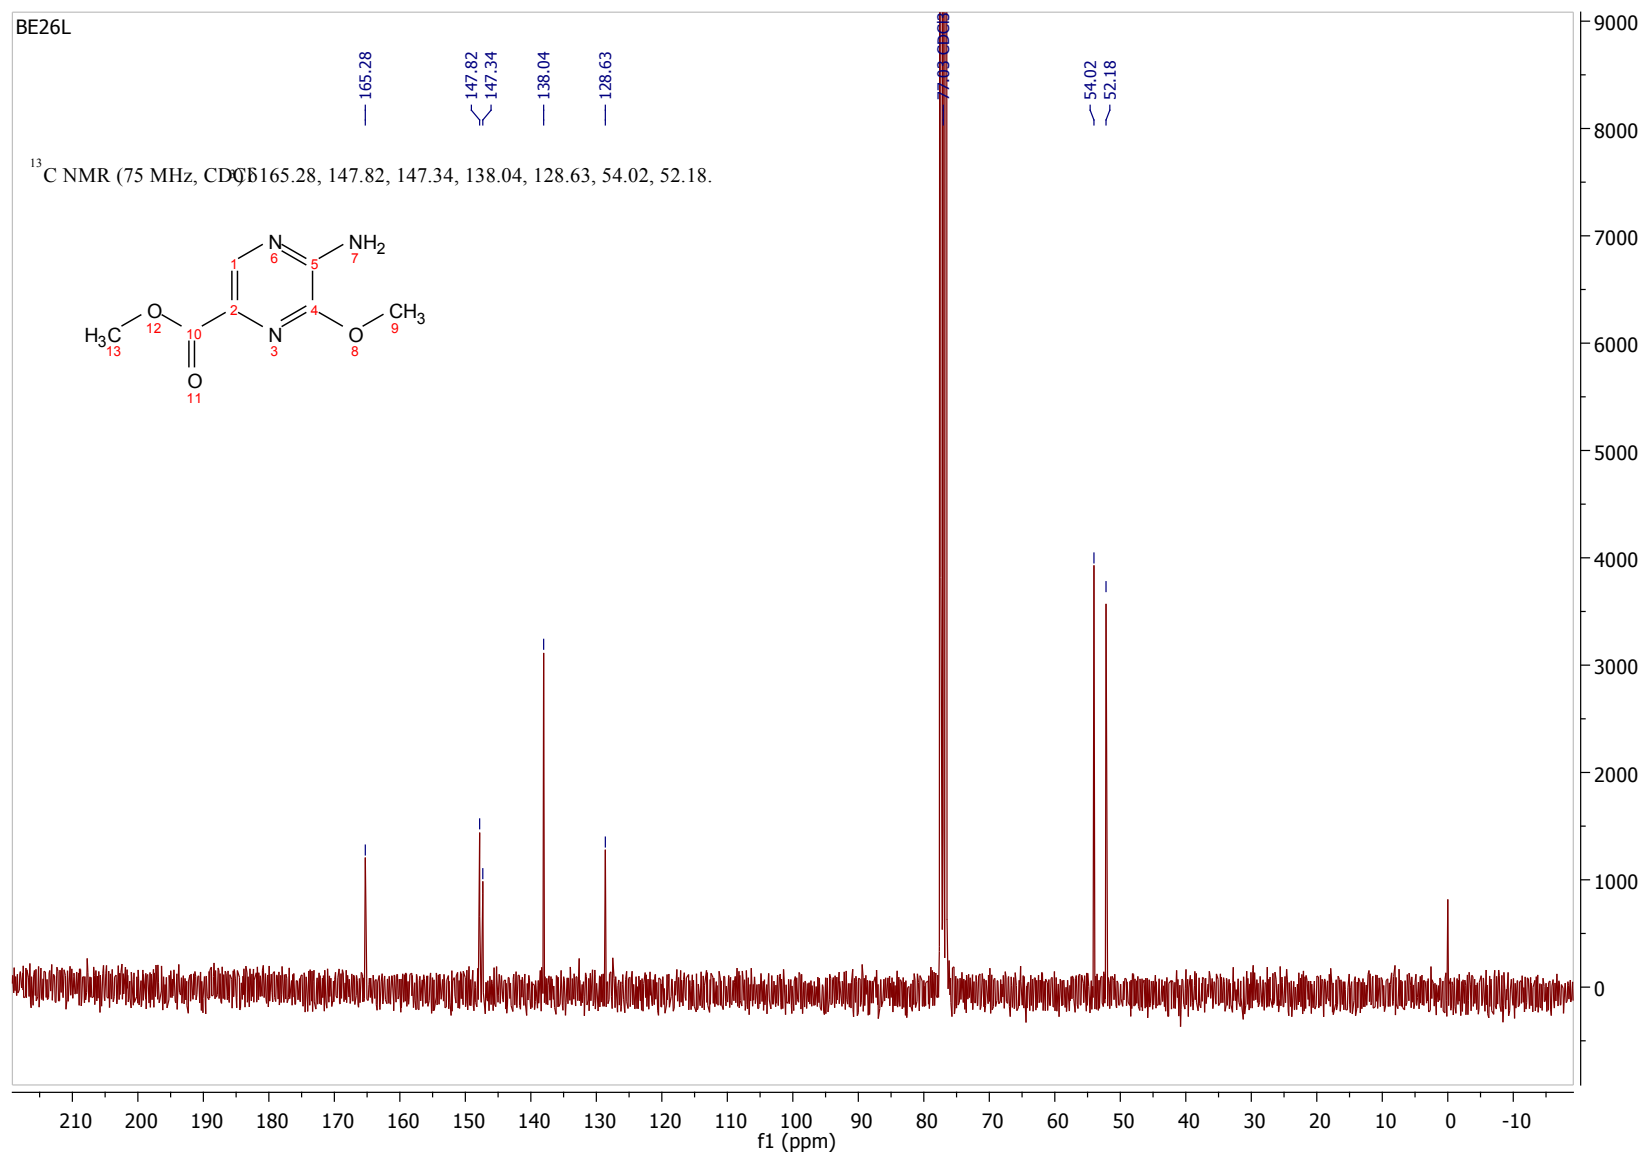

4b

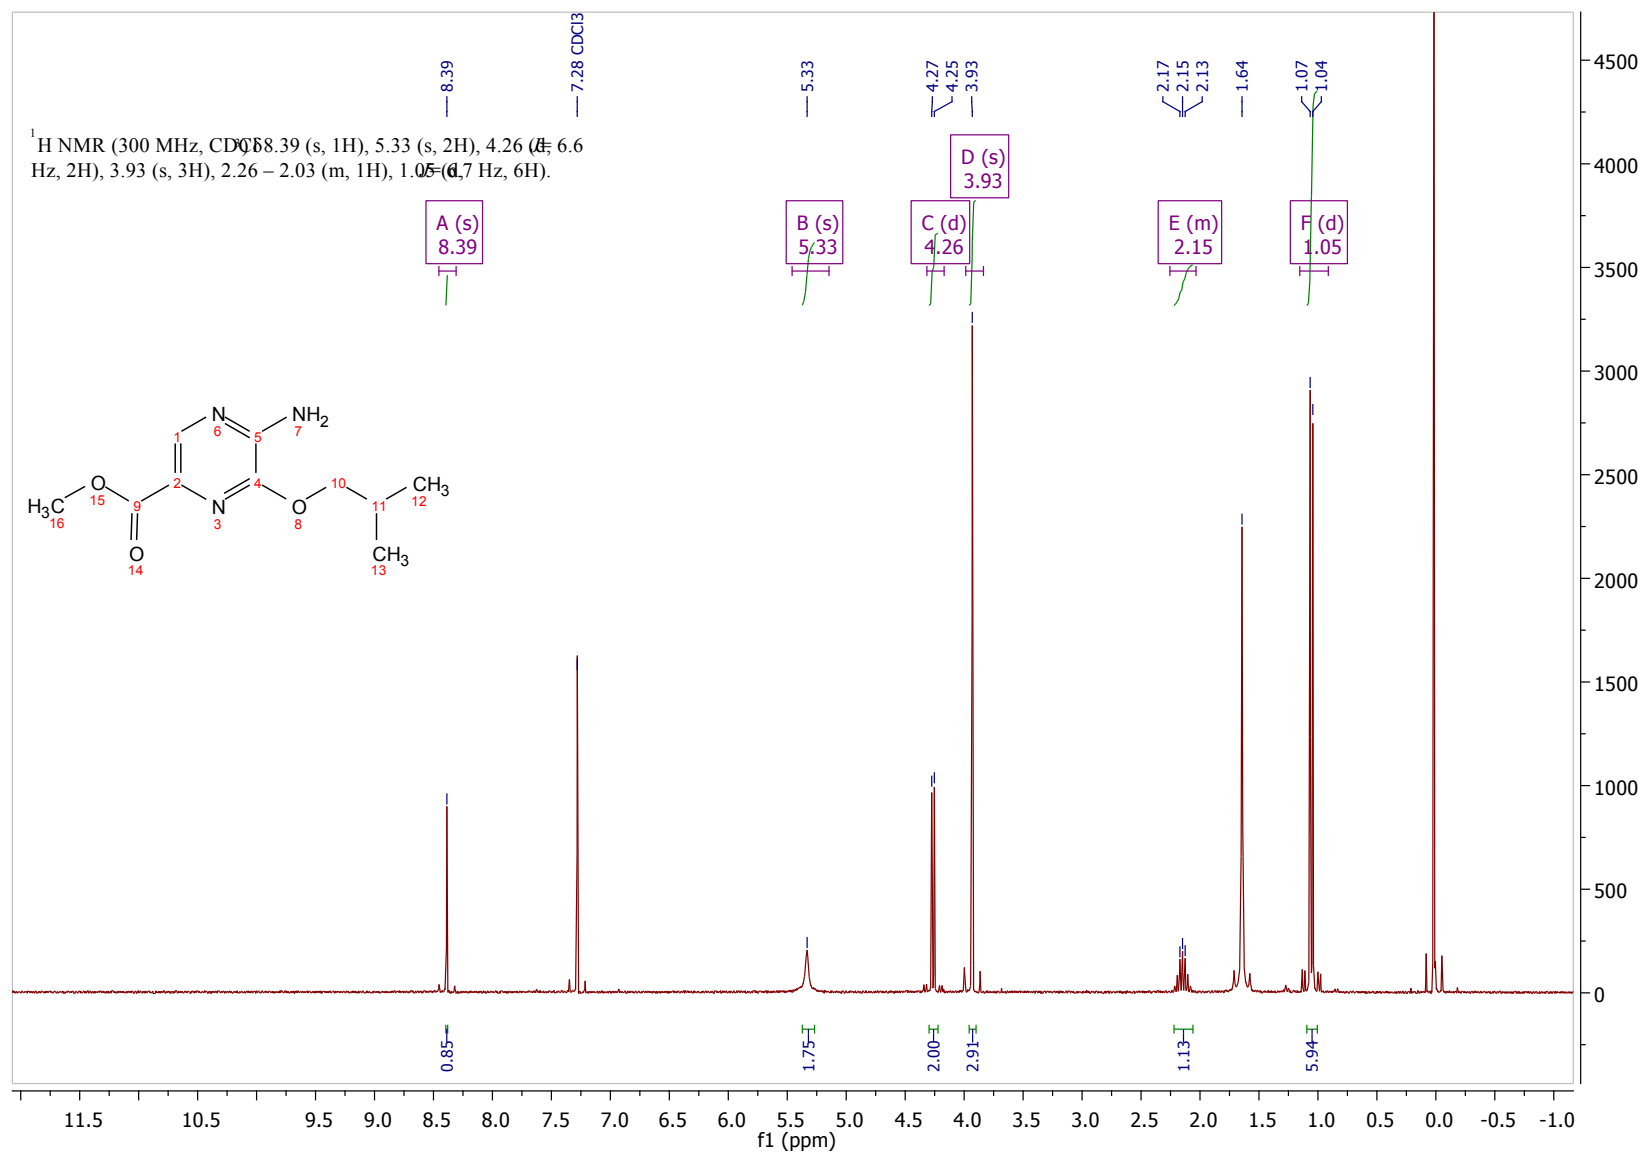

4b

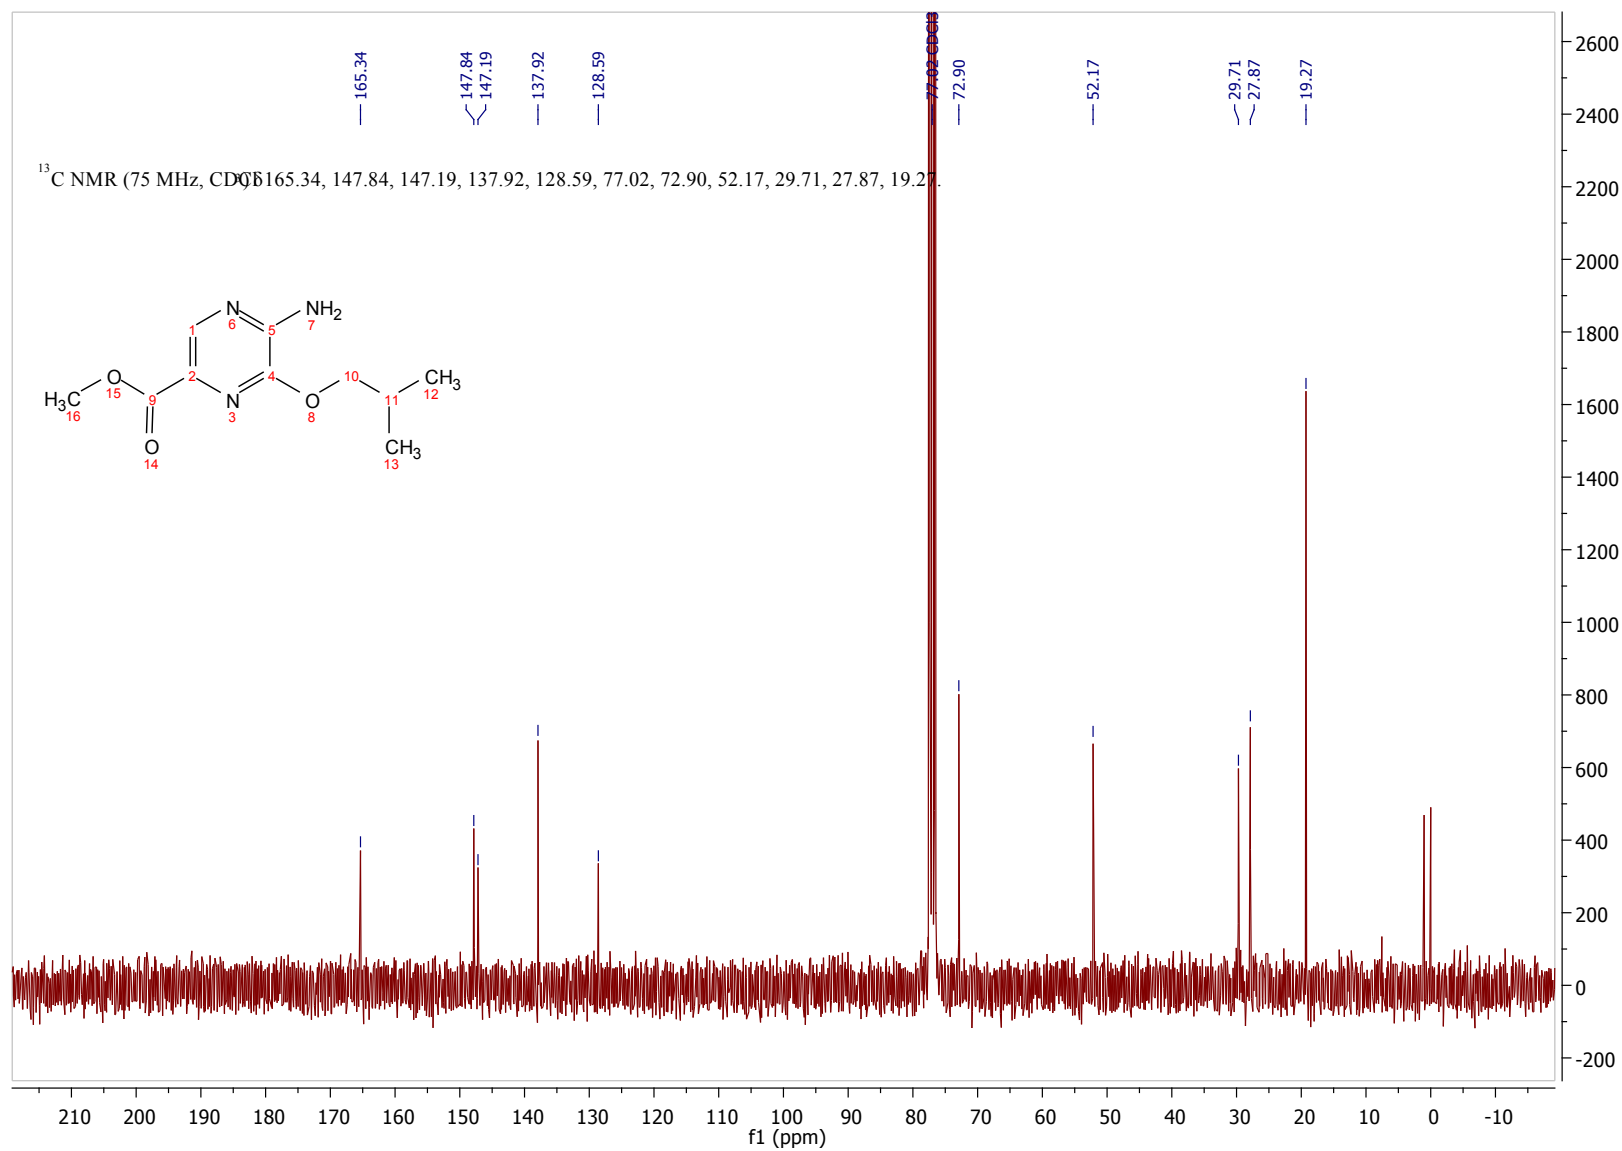

5a

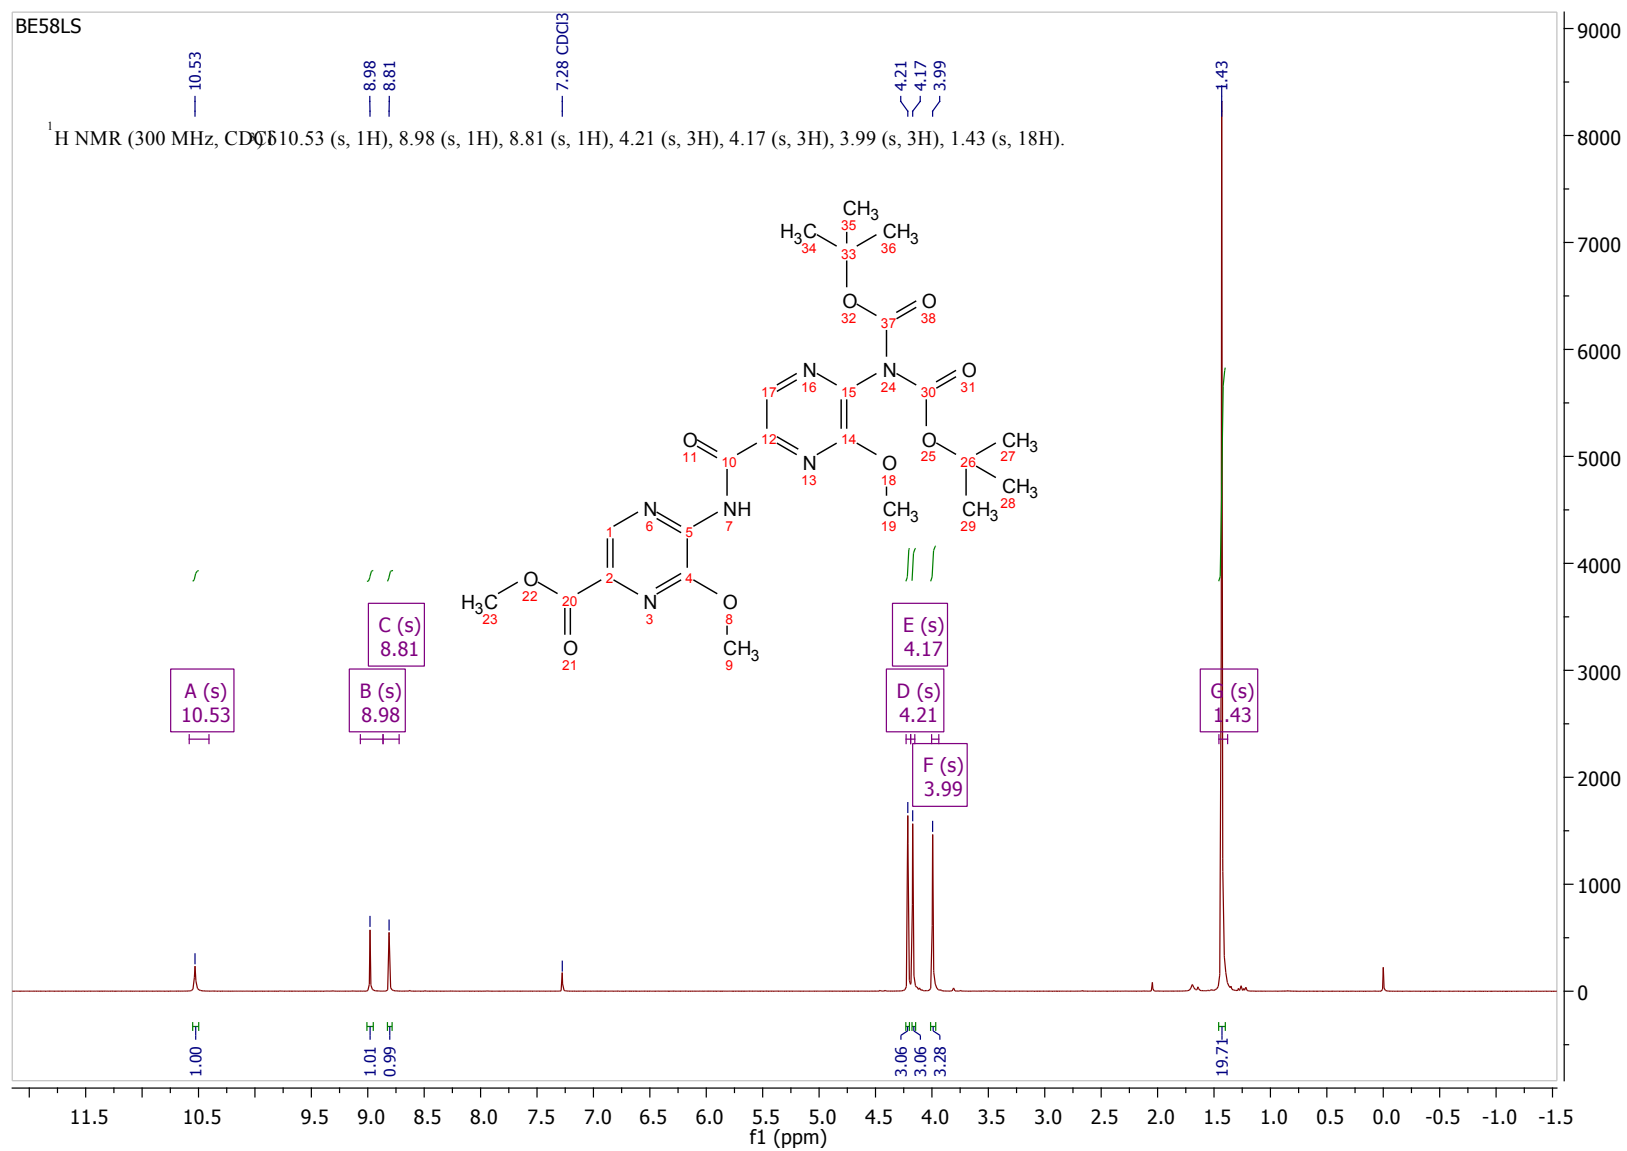



5a

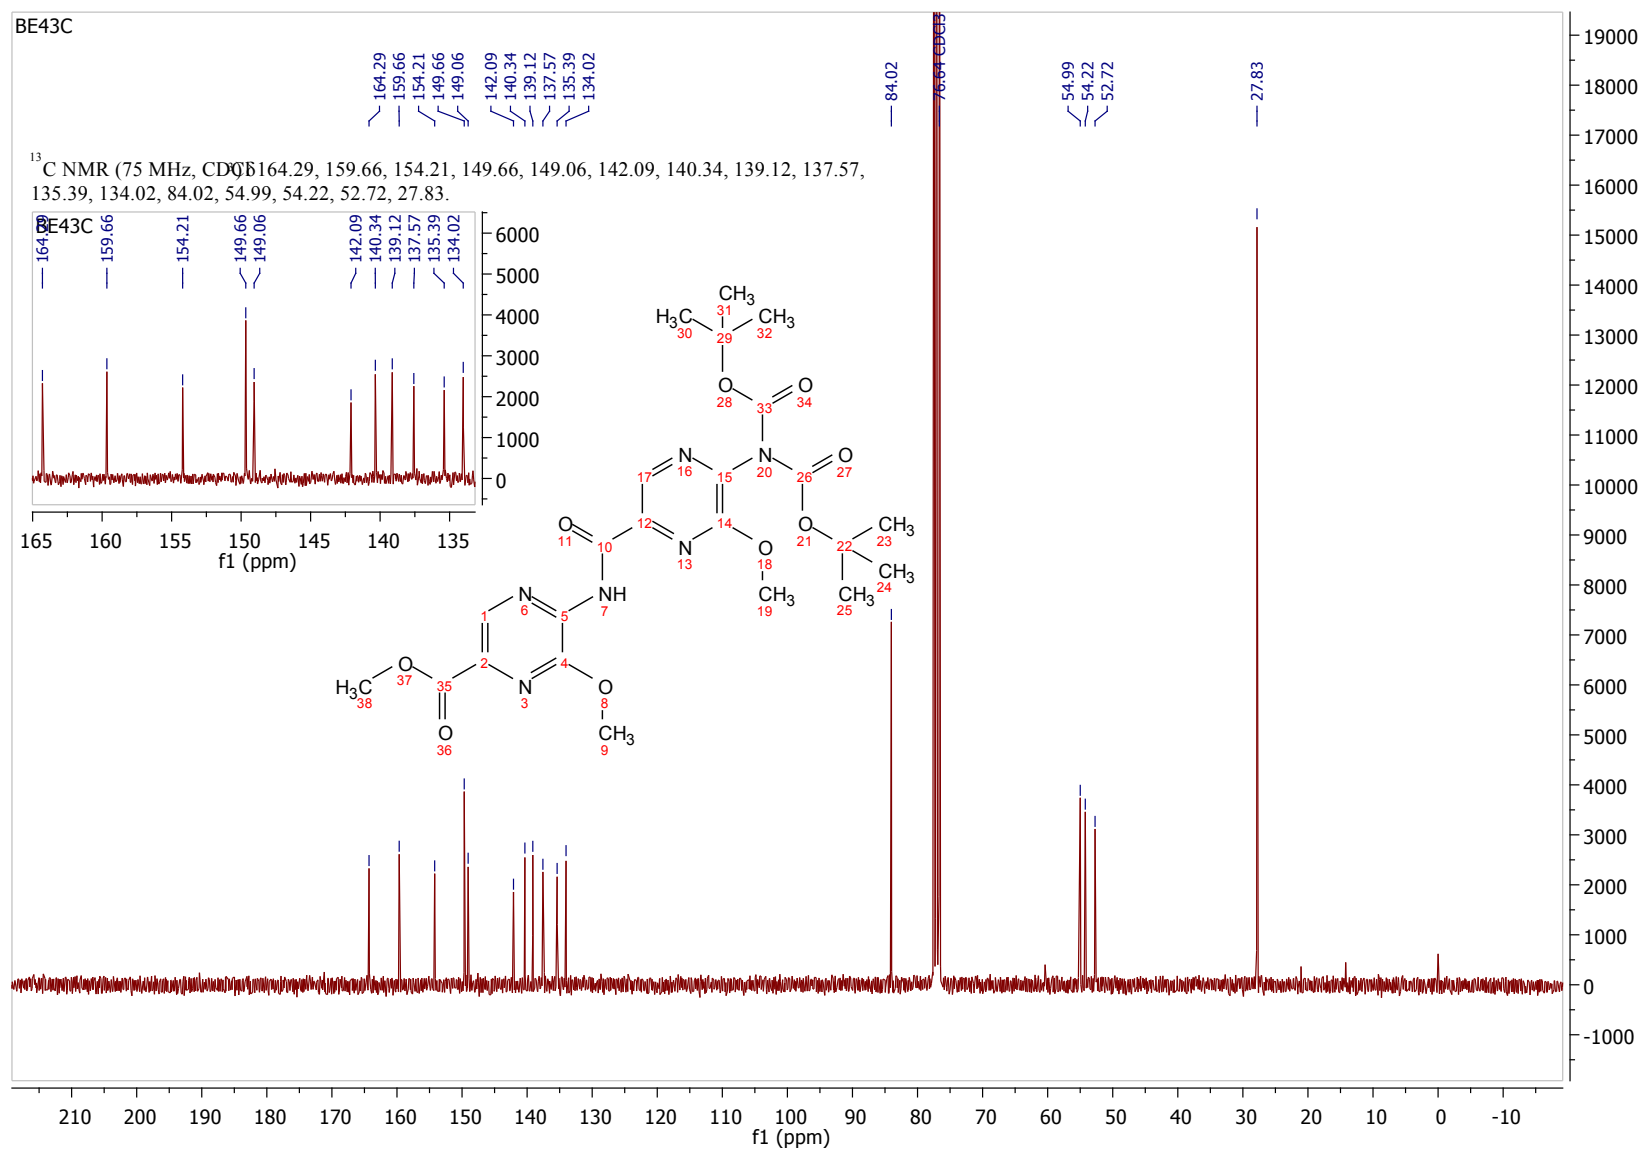

5b

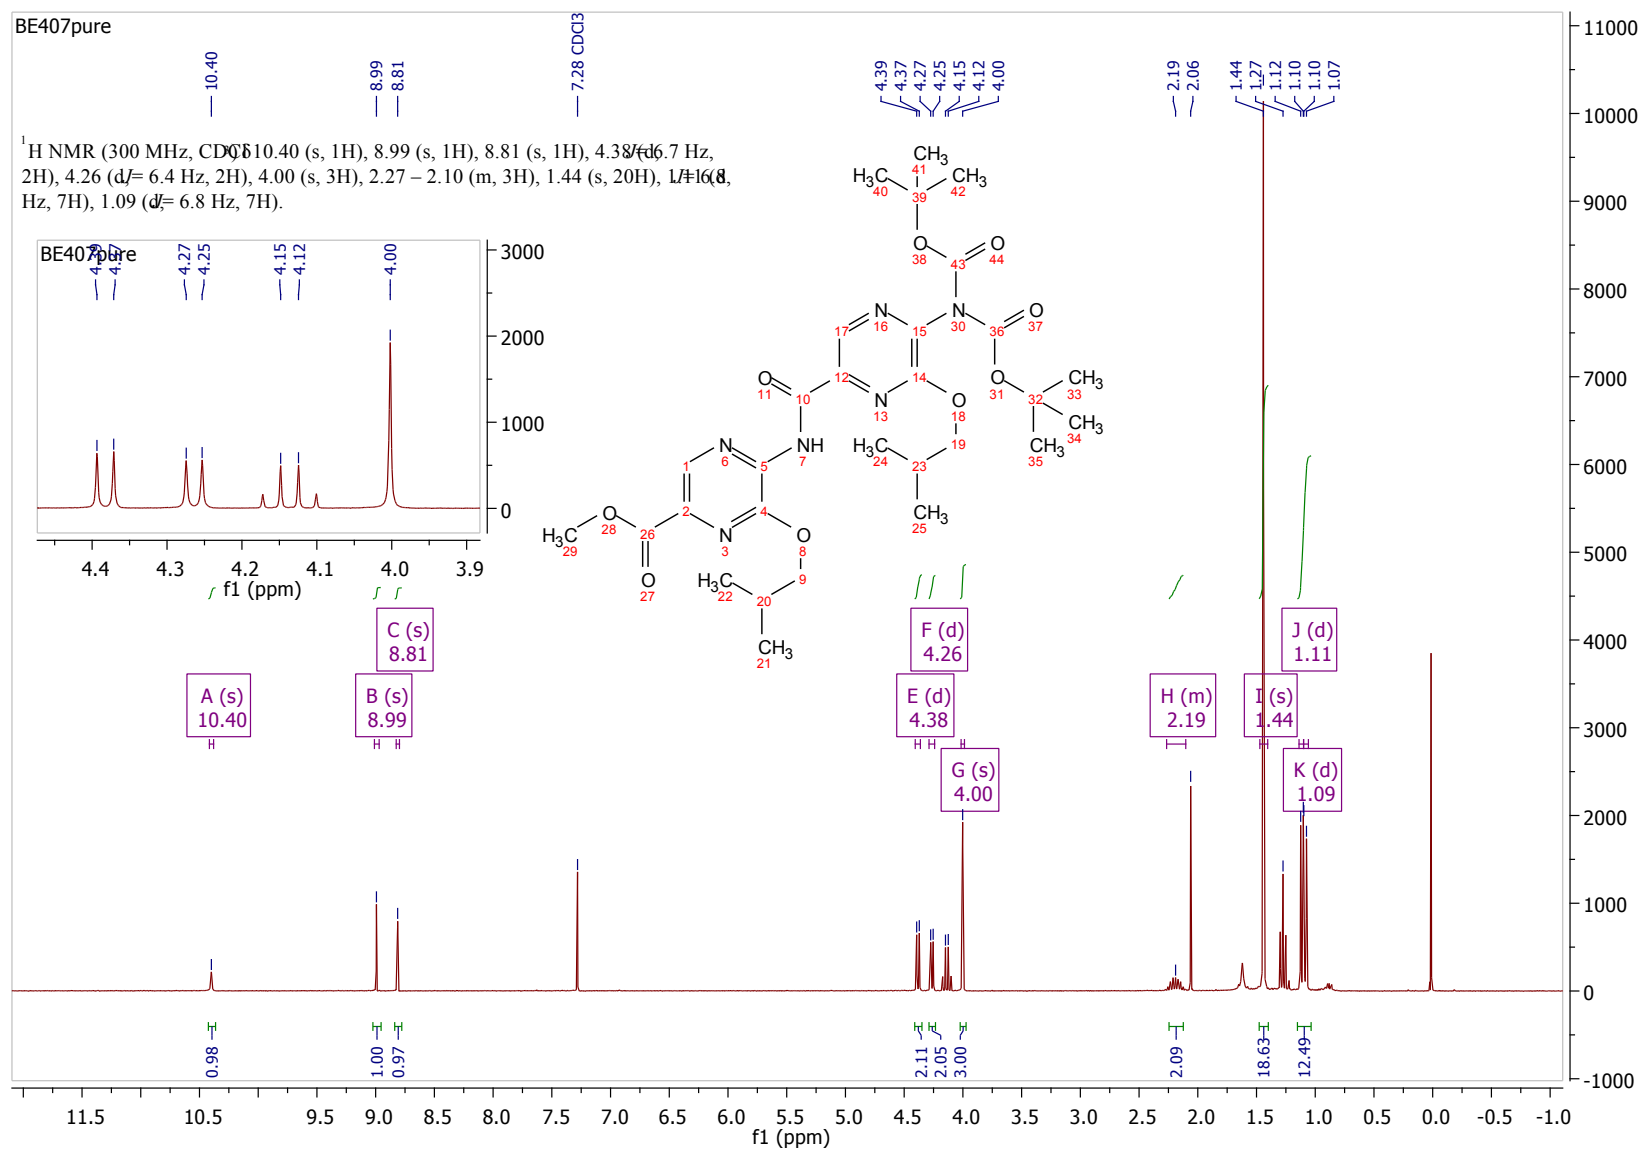

5b

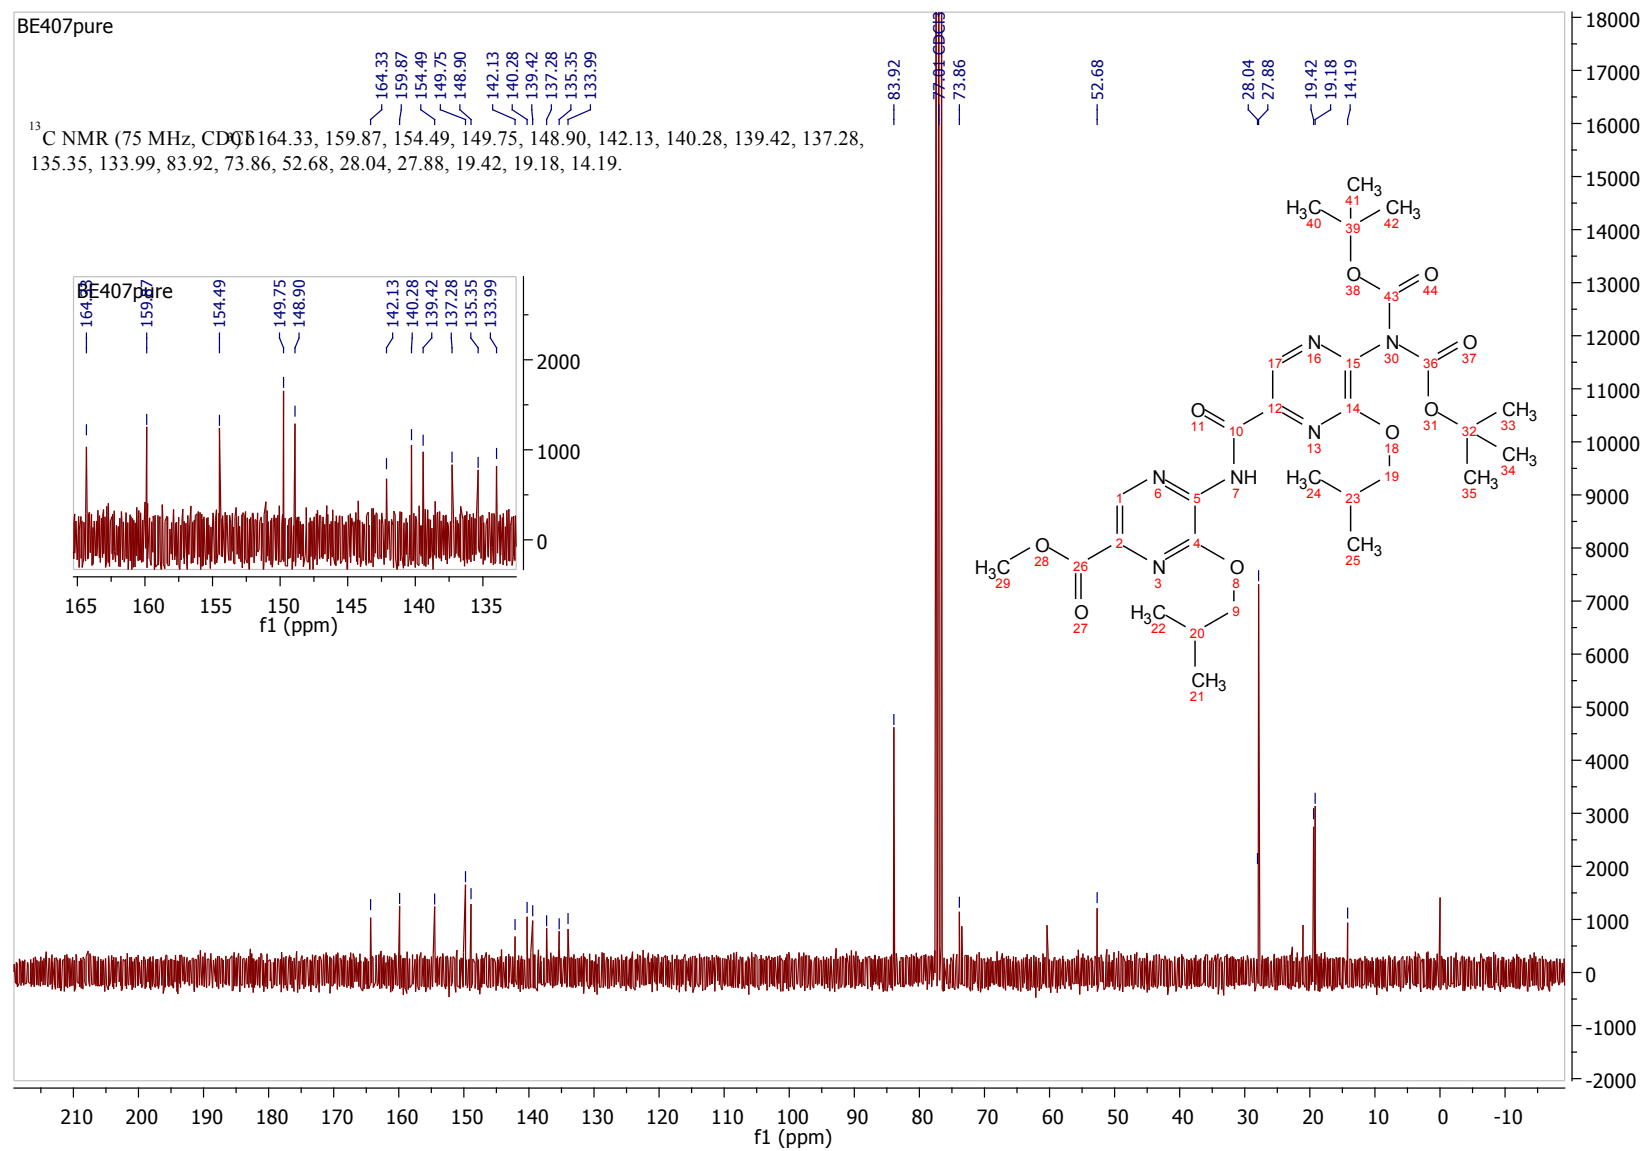

### 5b' (Buchwald-Hartwig aminated product)

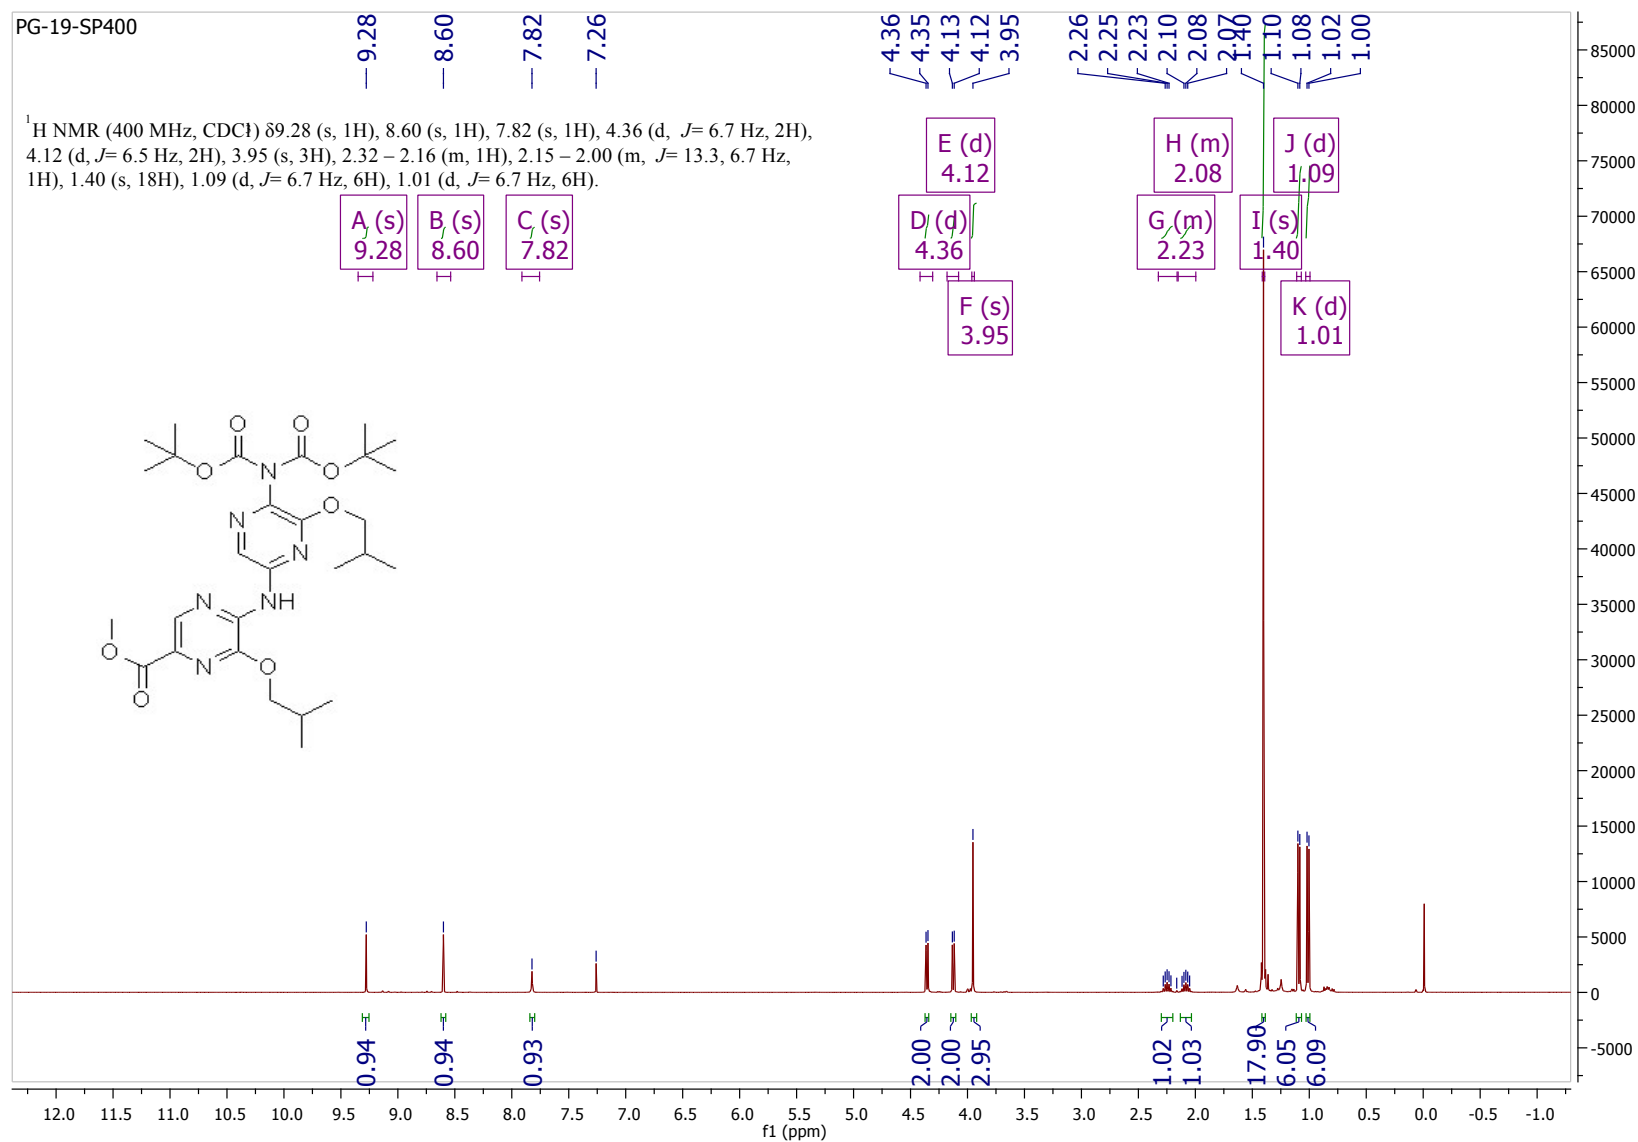

### 5b' (Buchwald-Hartwig aminated product)

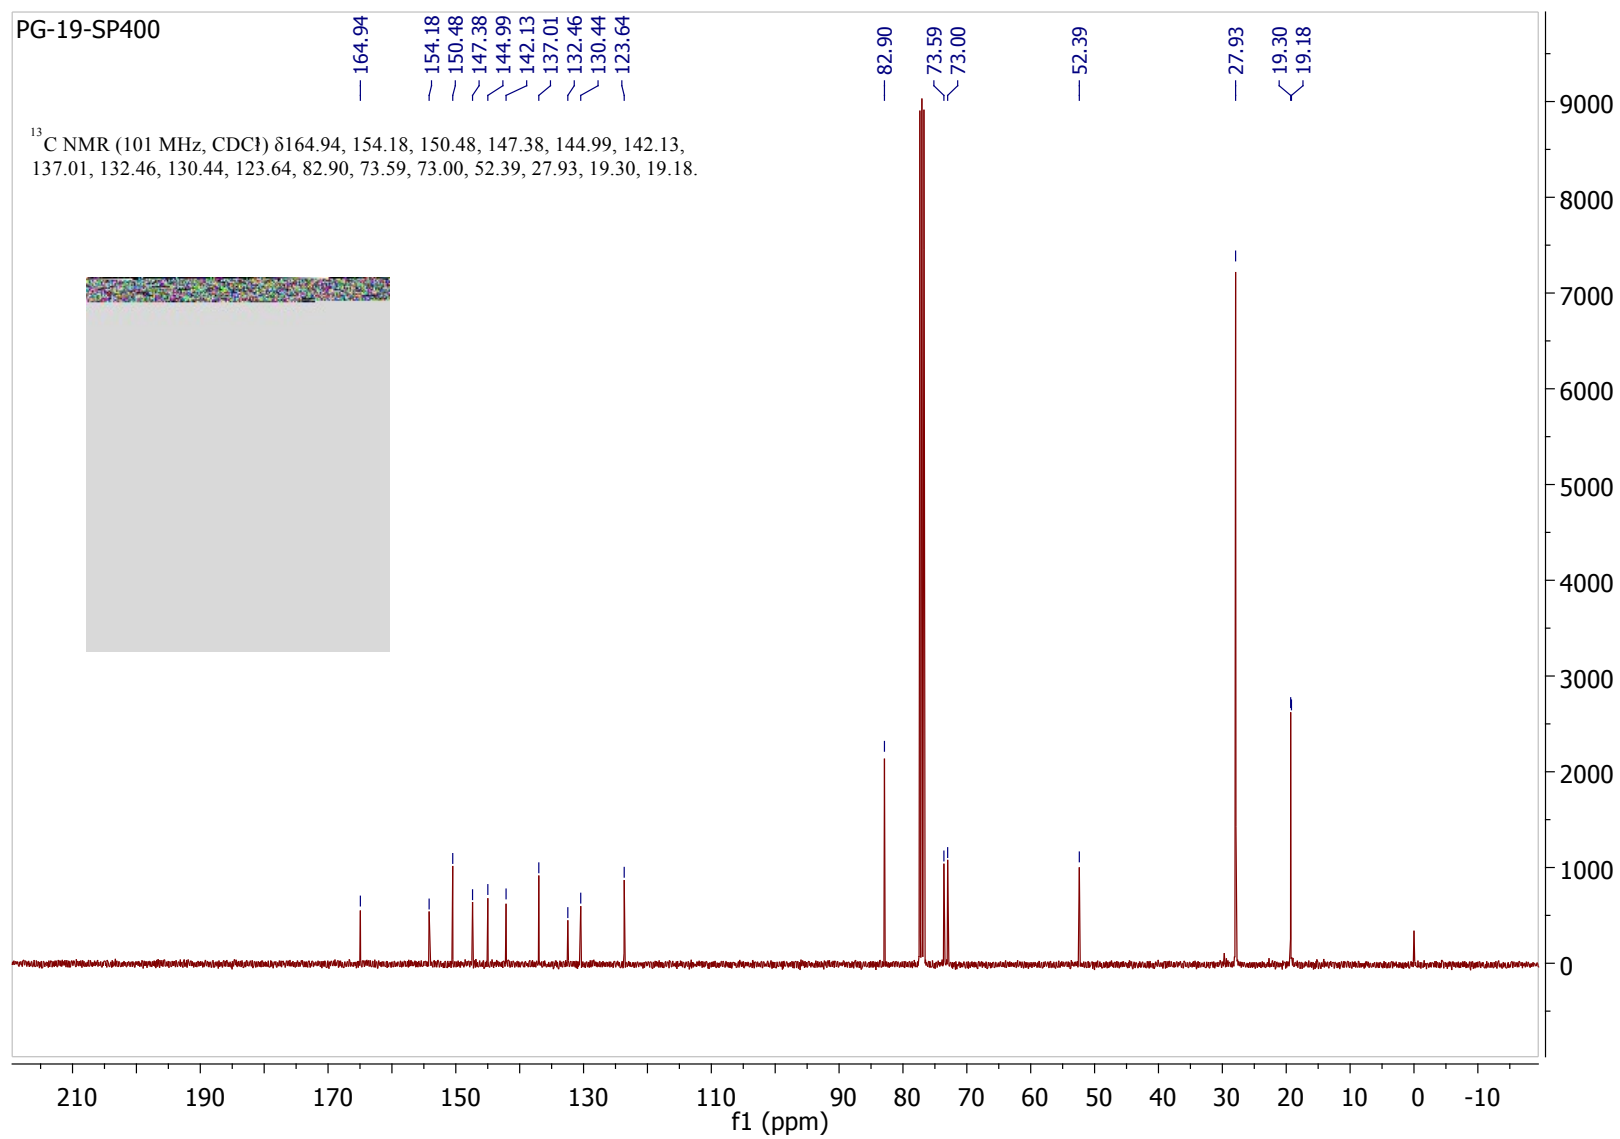

6b

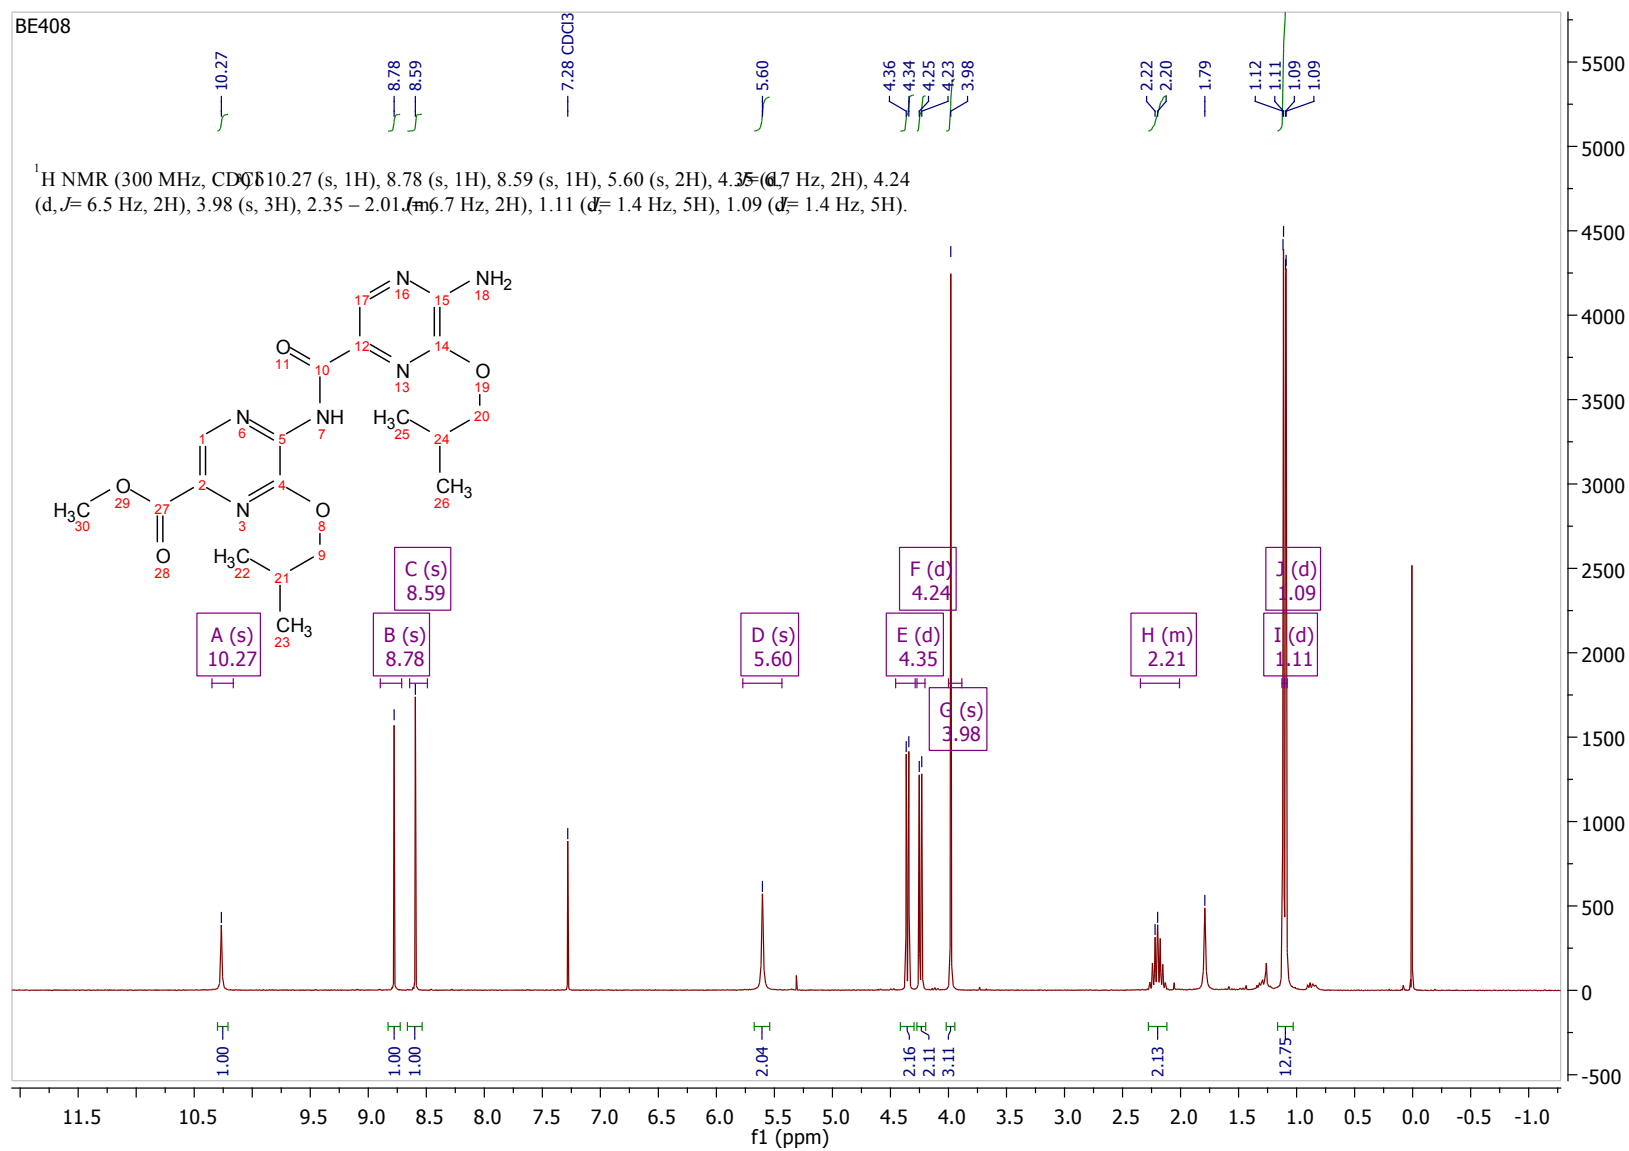

6b

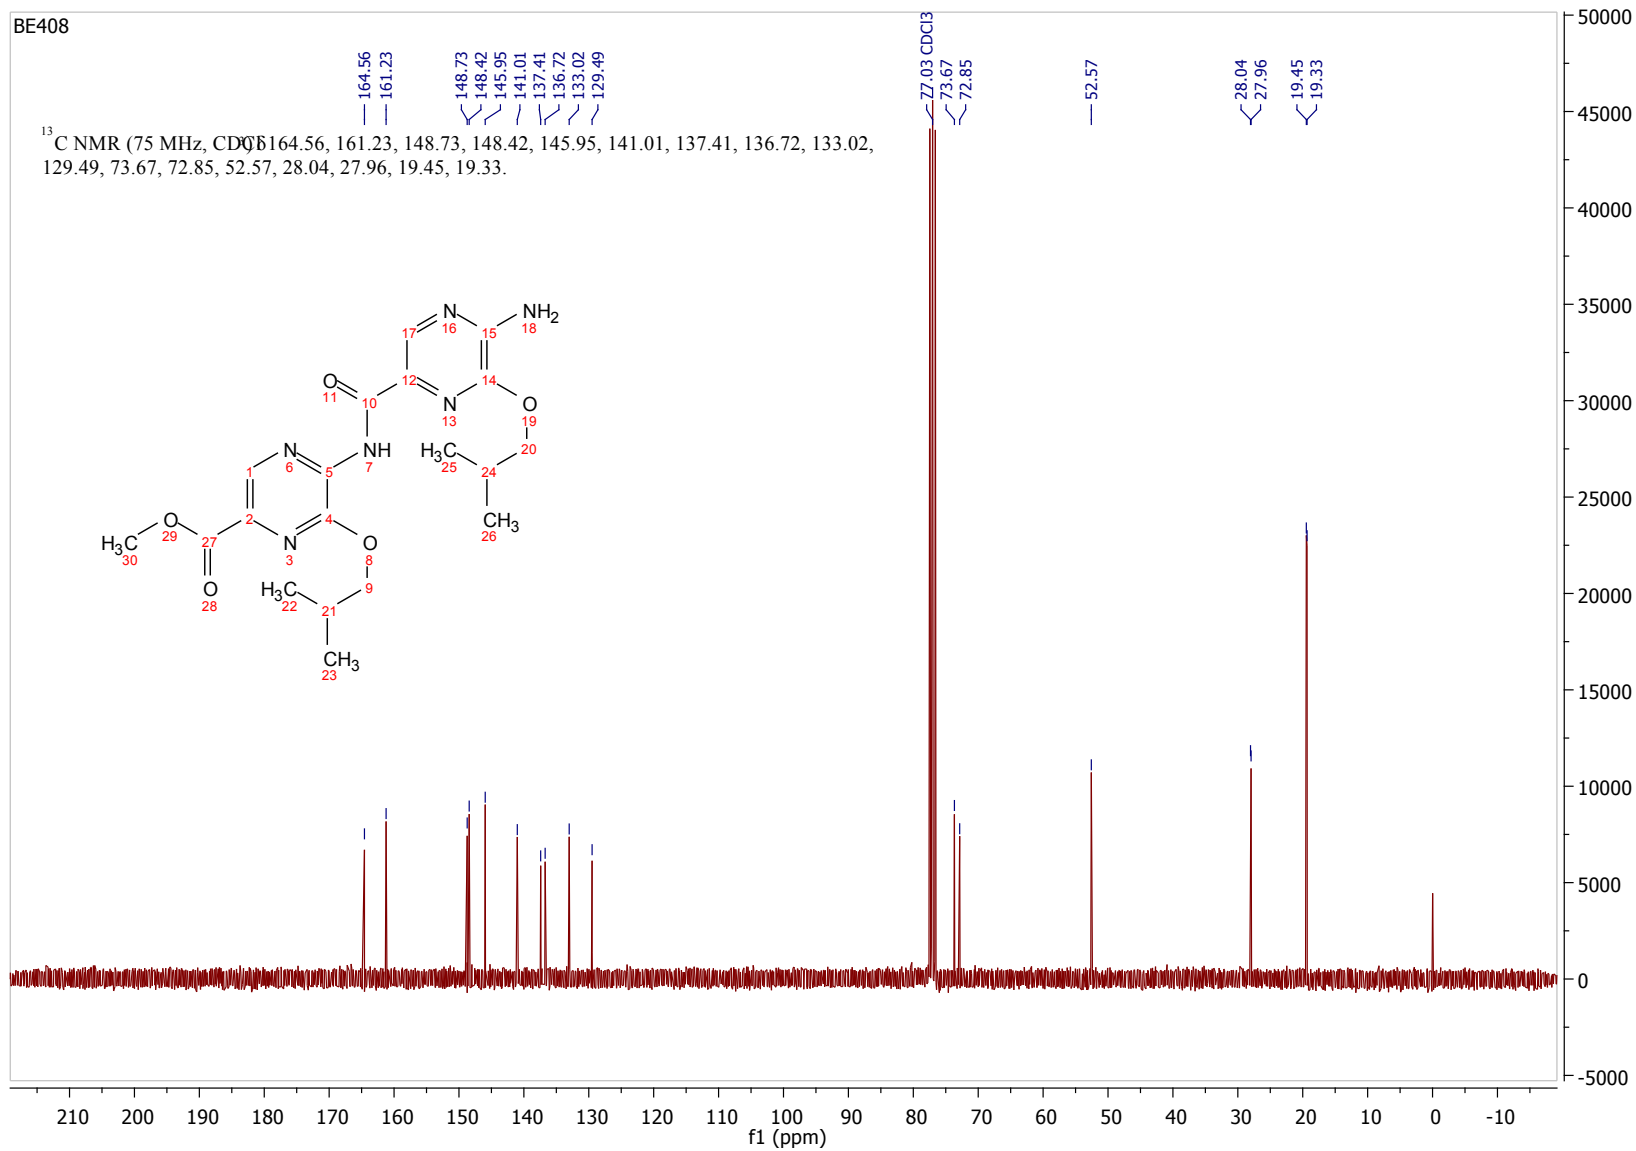

7a

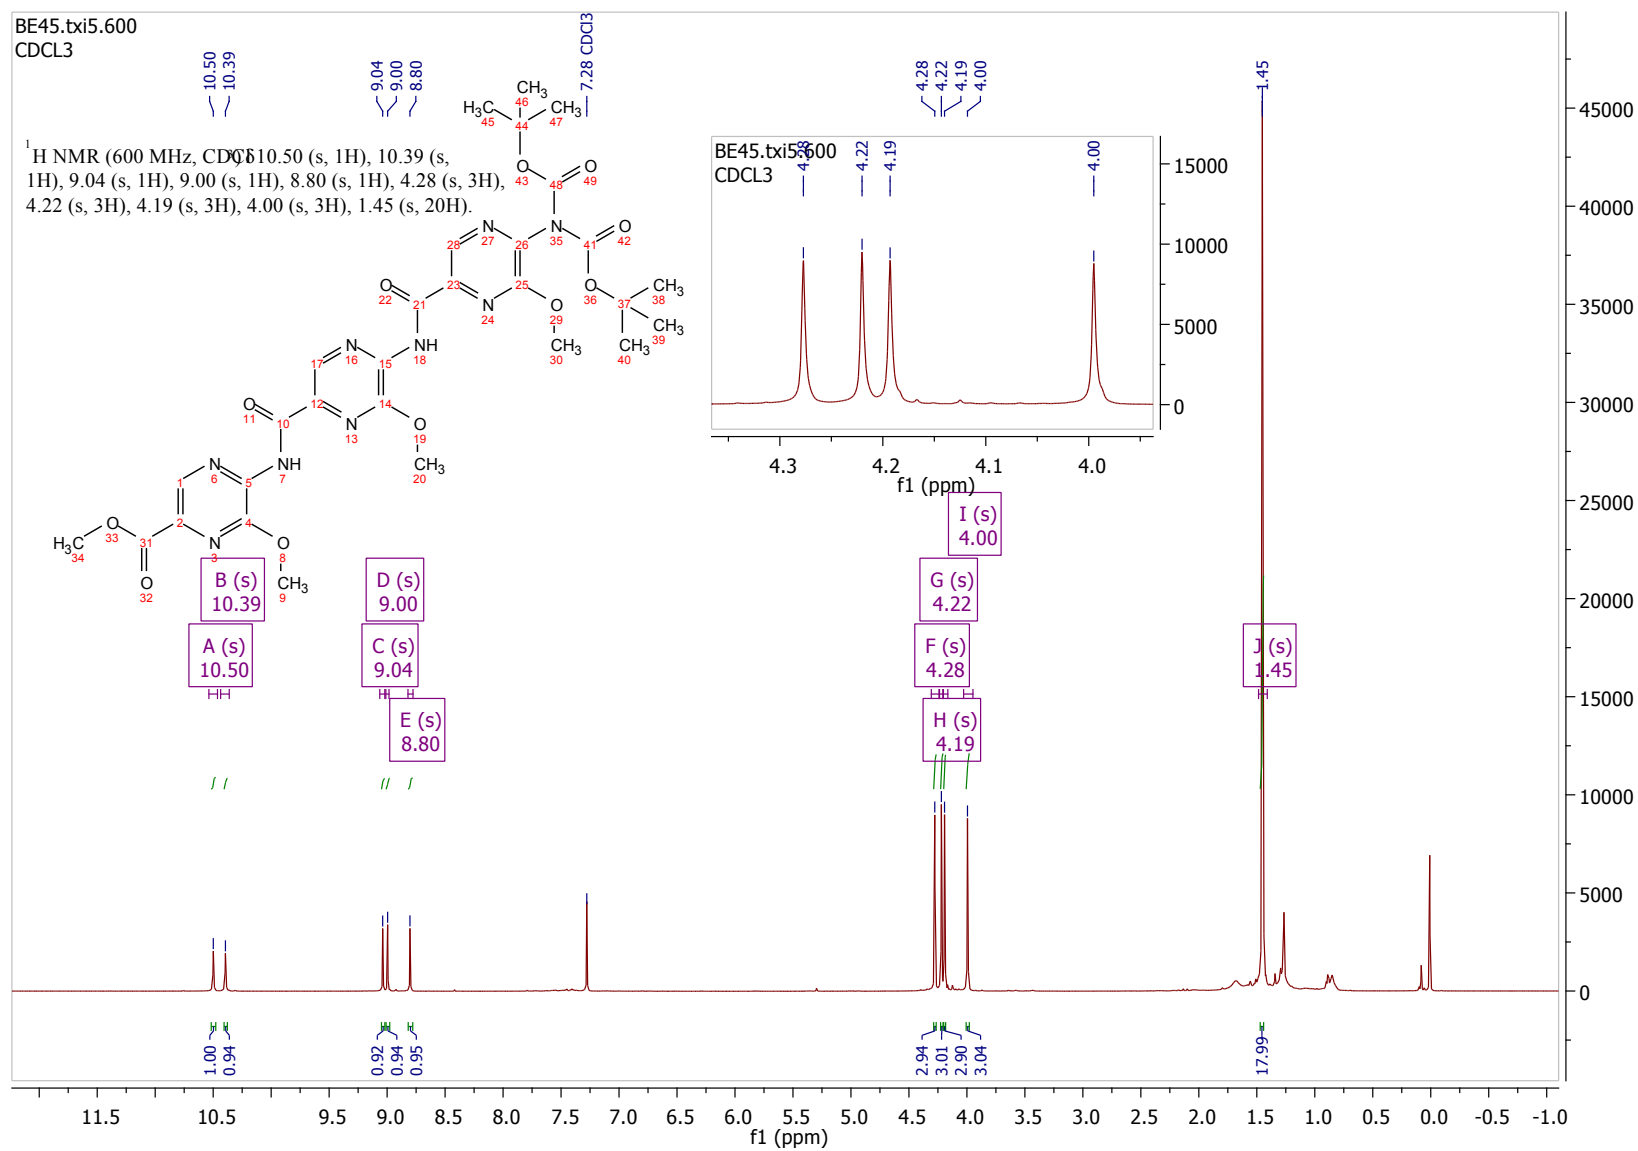



7a

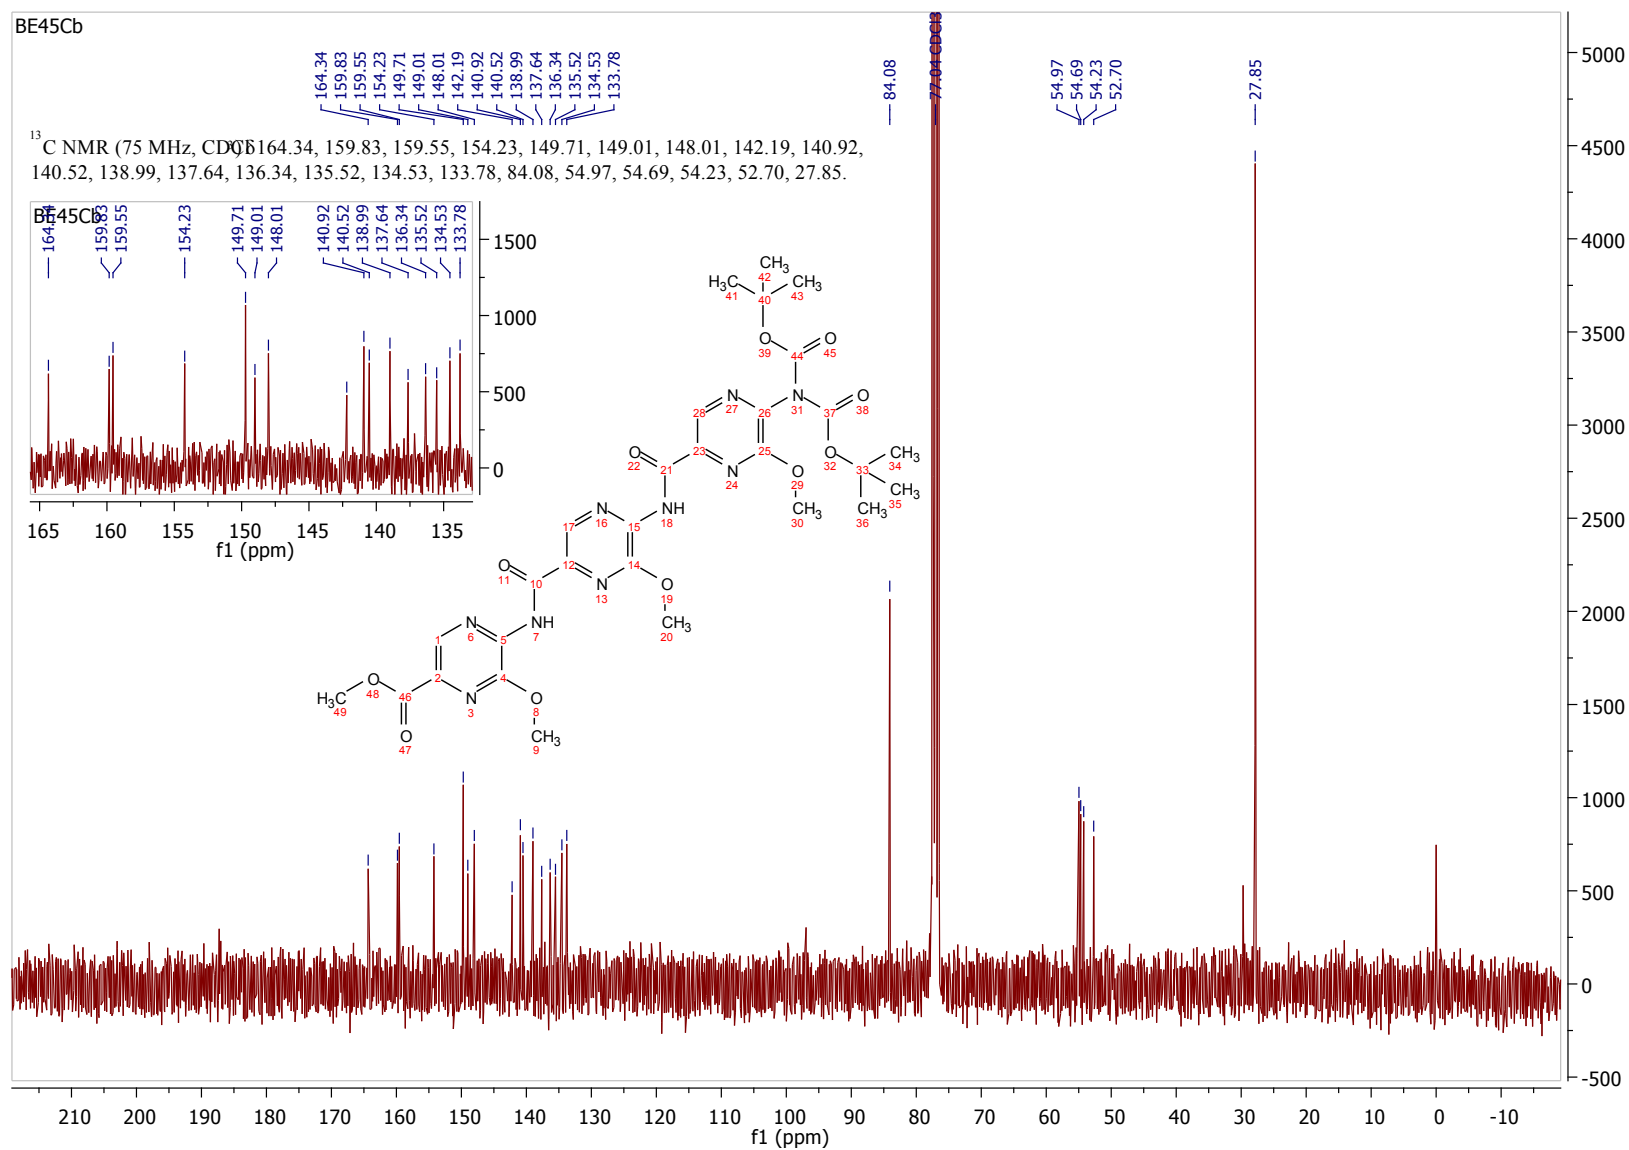

7a

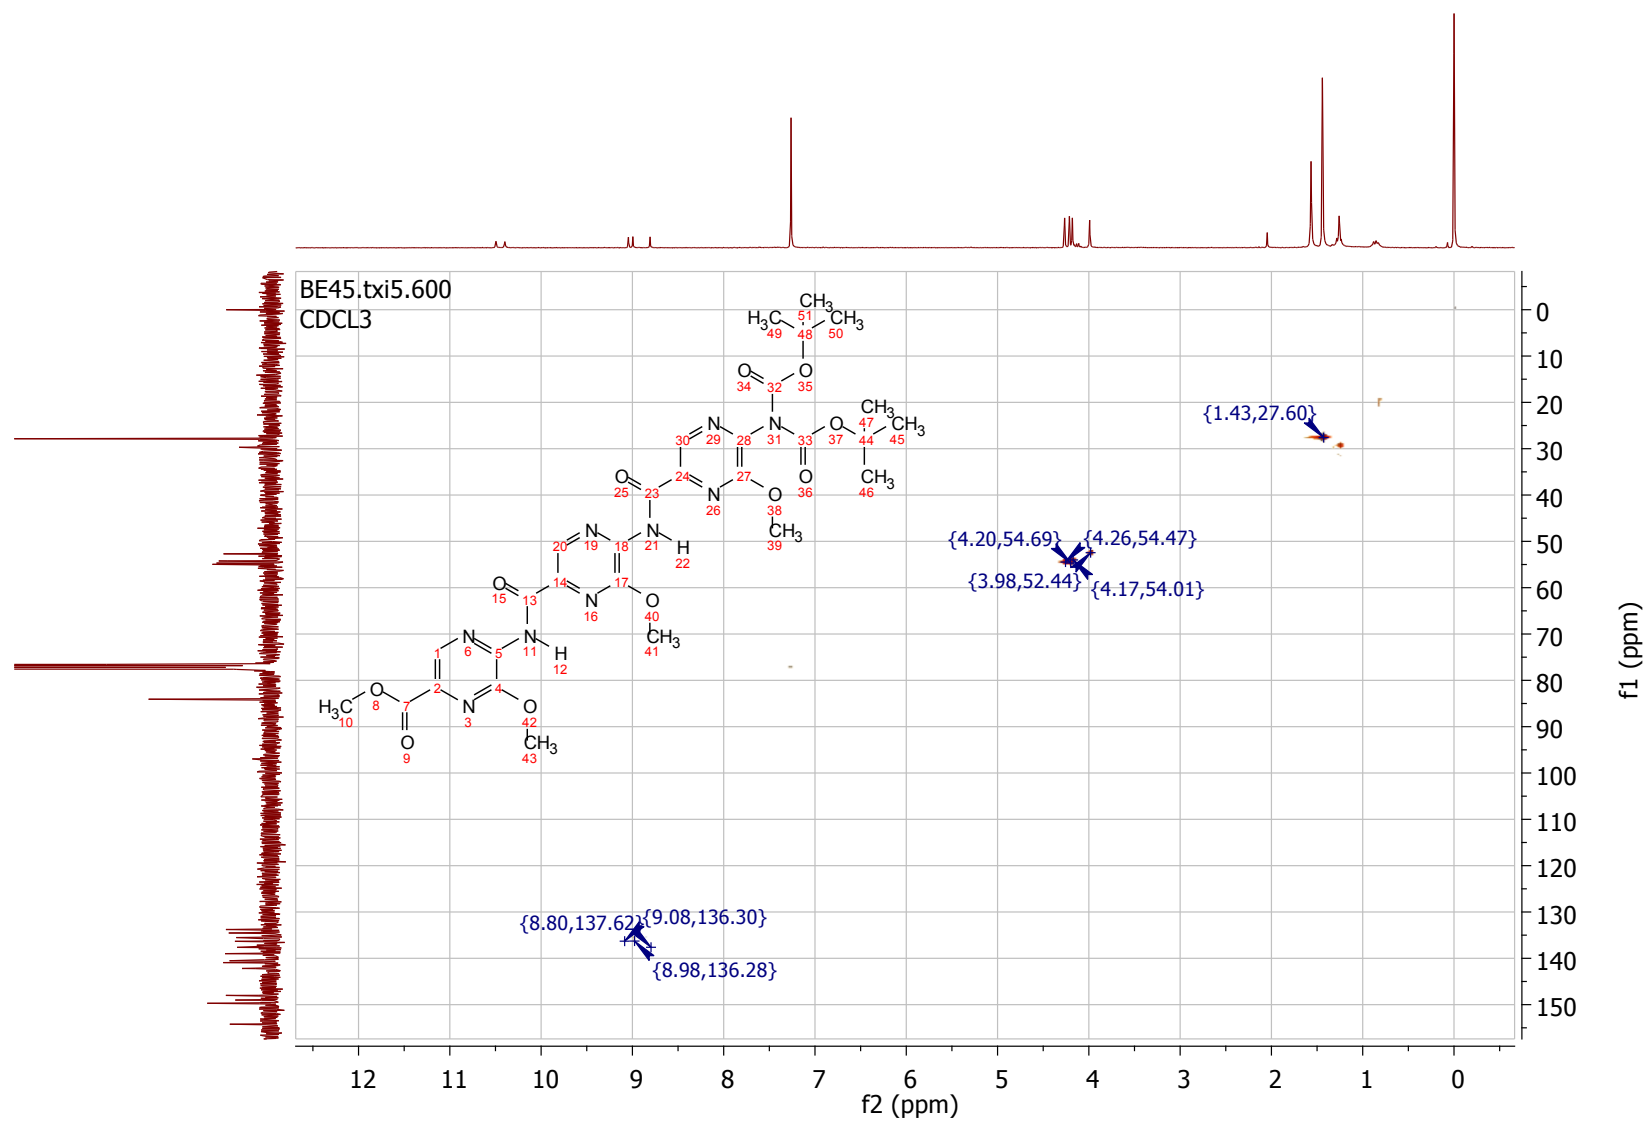

7b

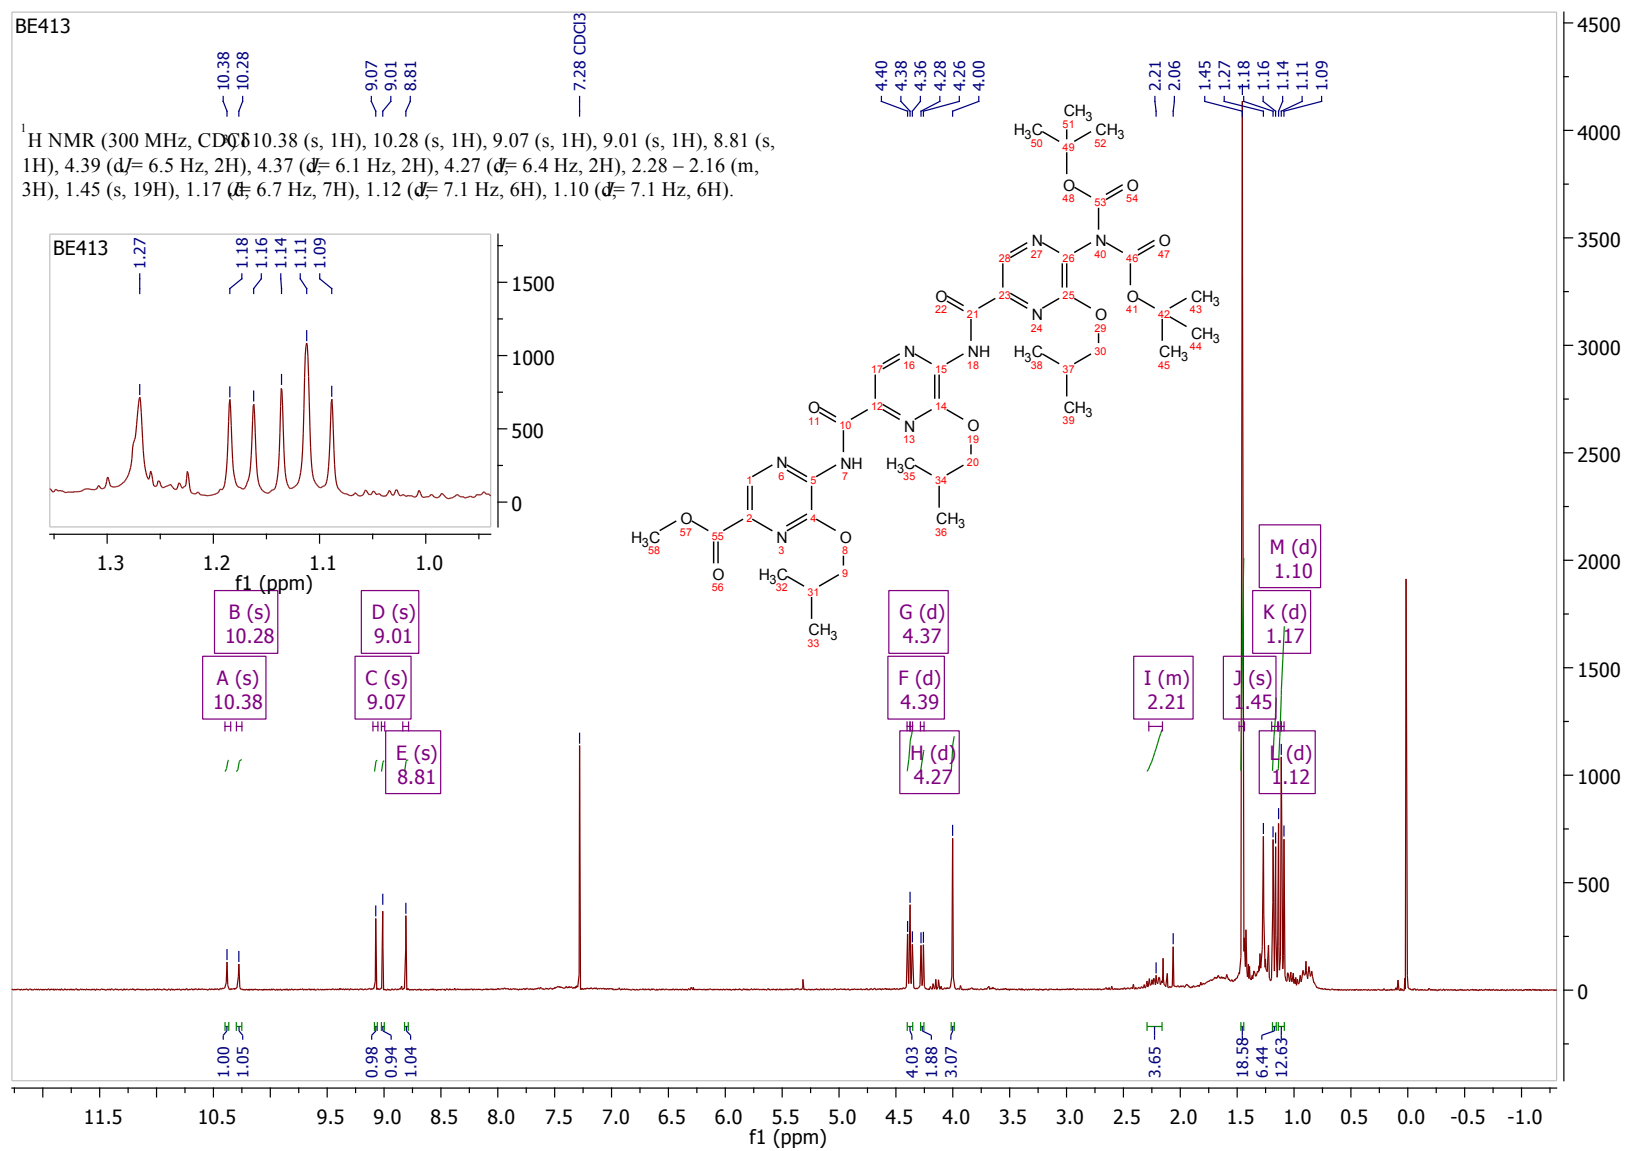

7b

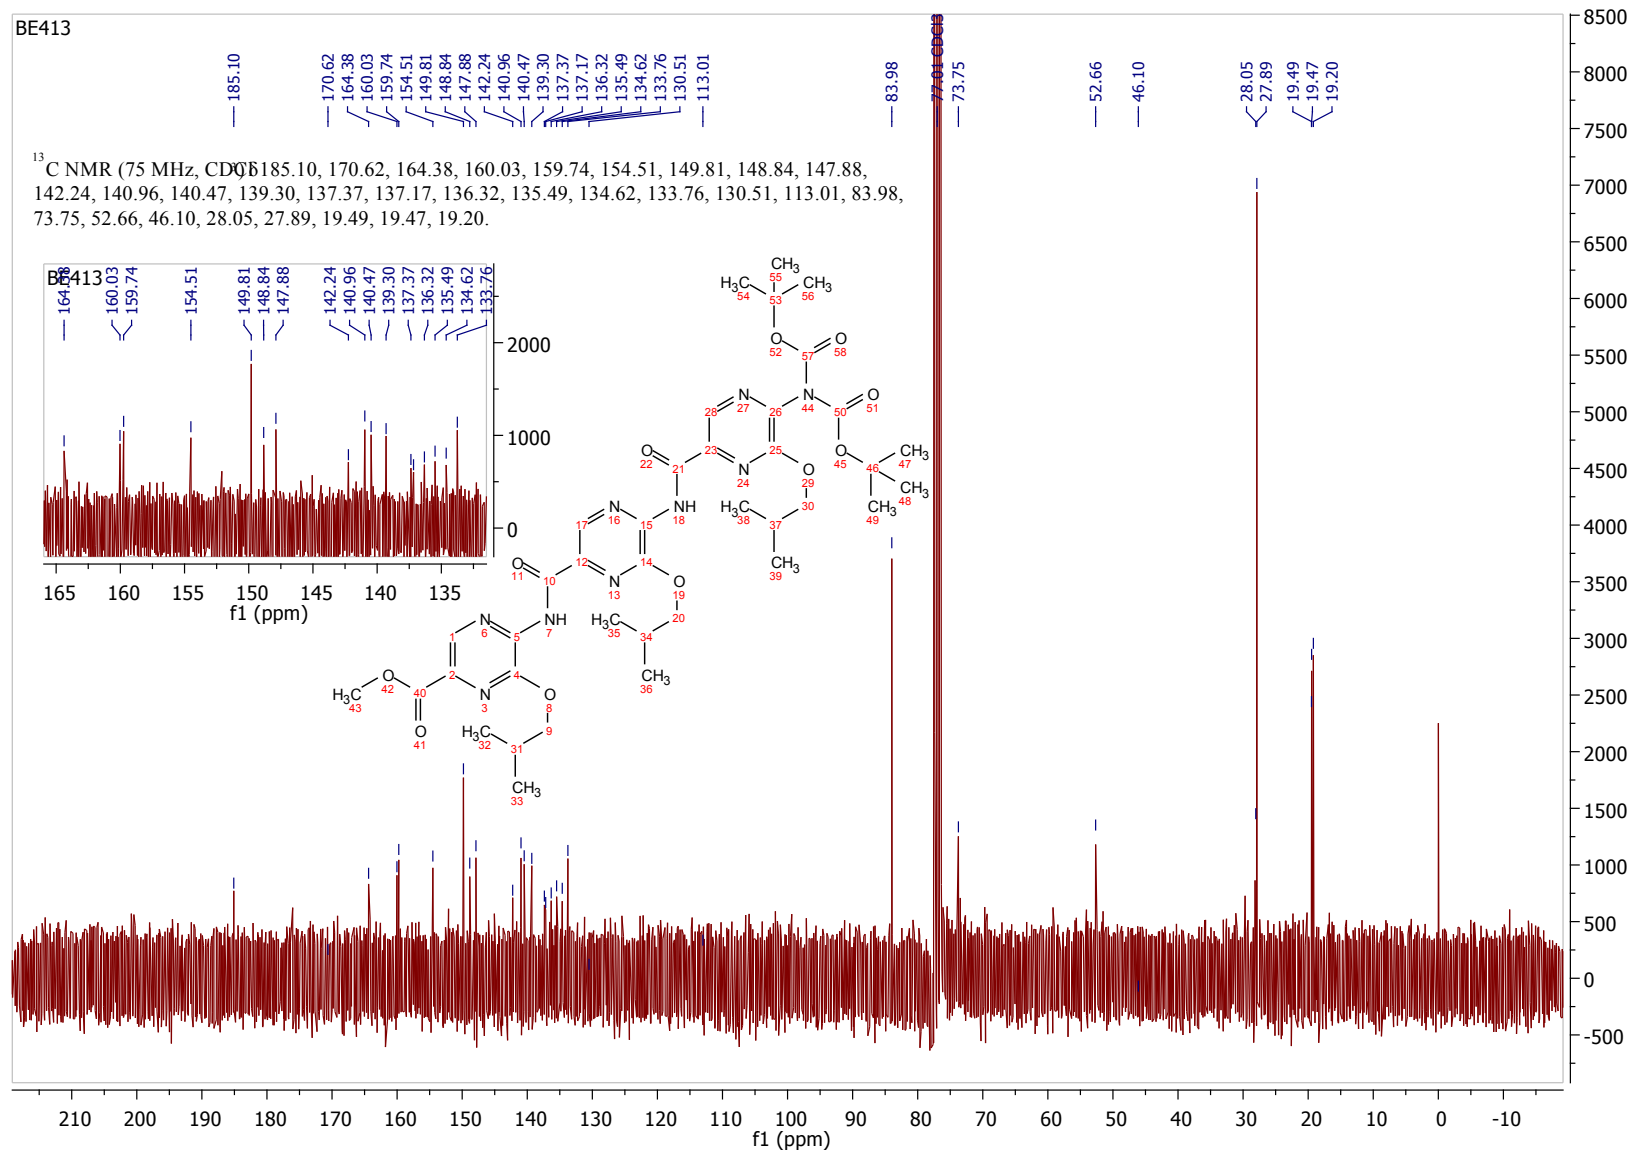

7c

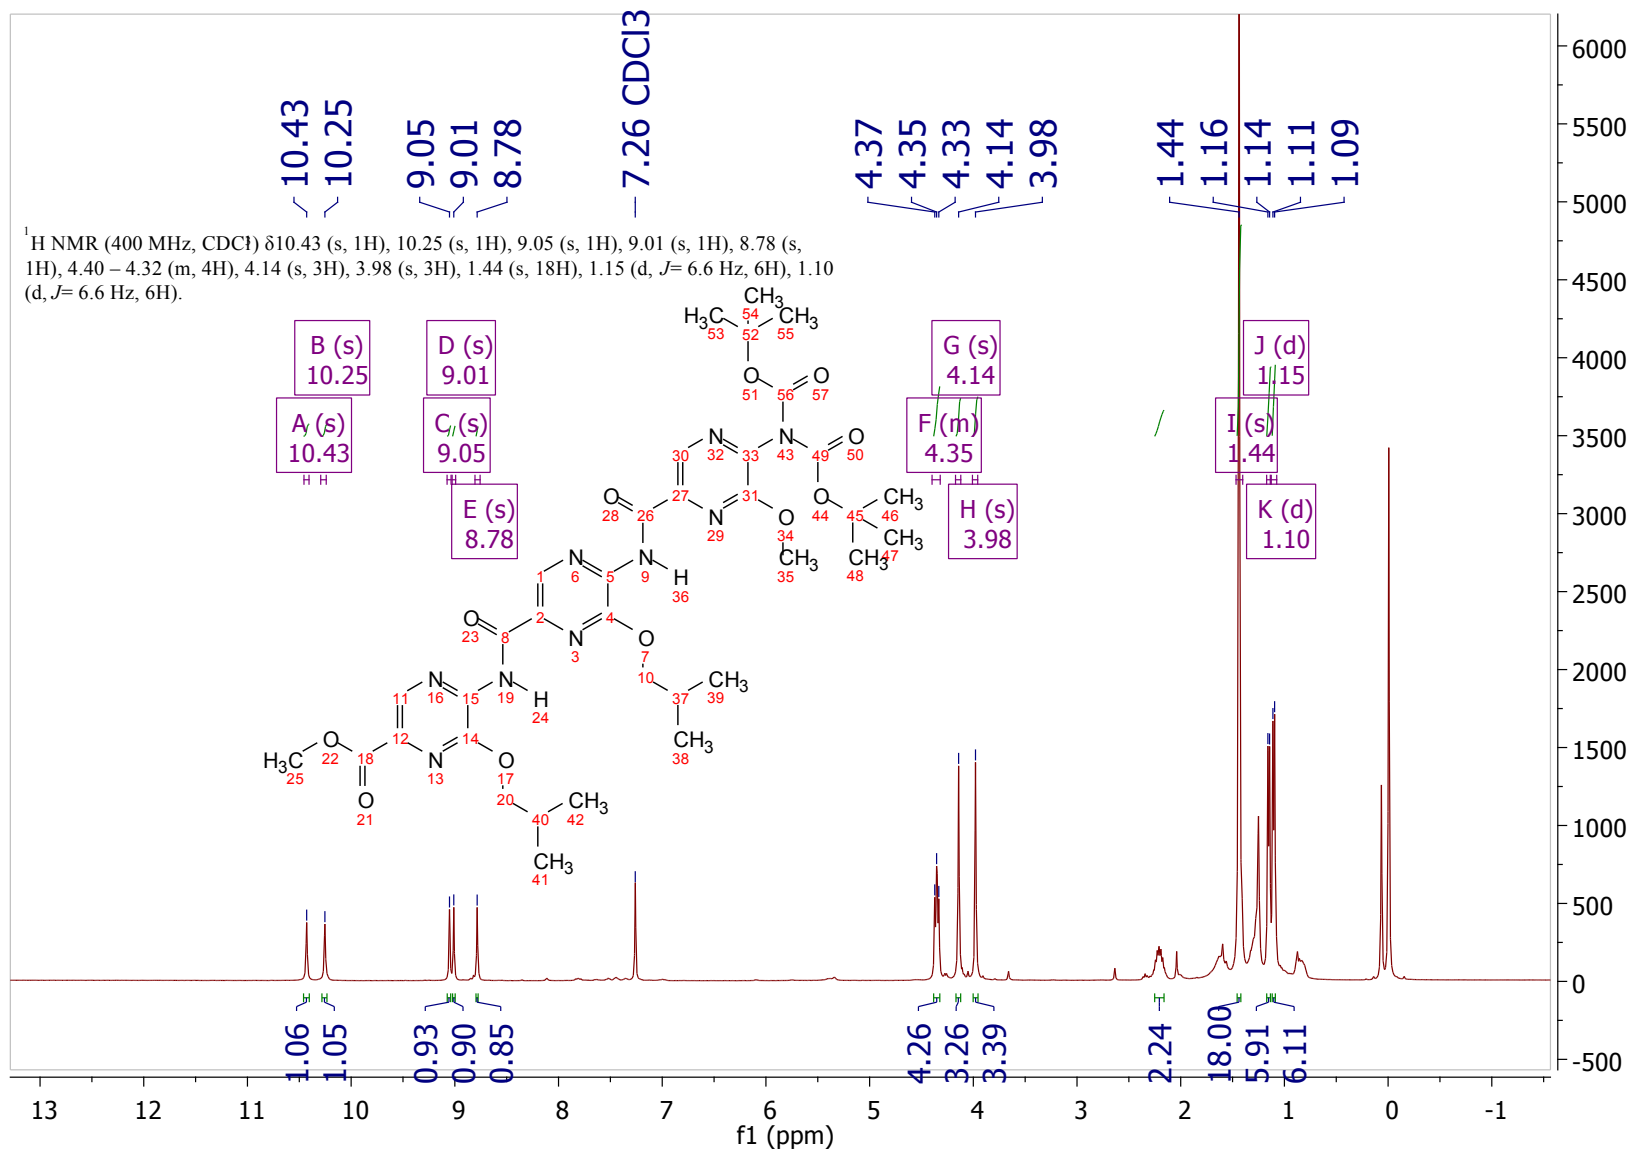

7c

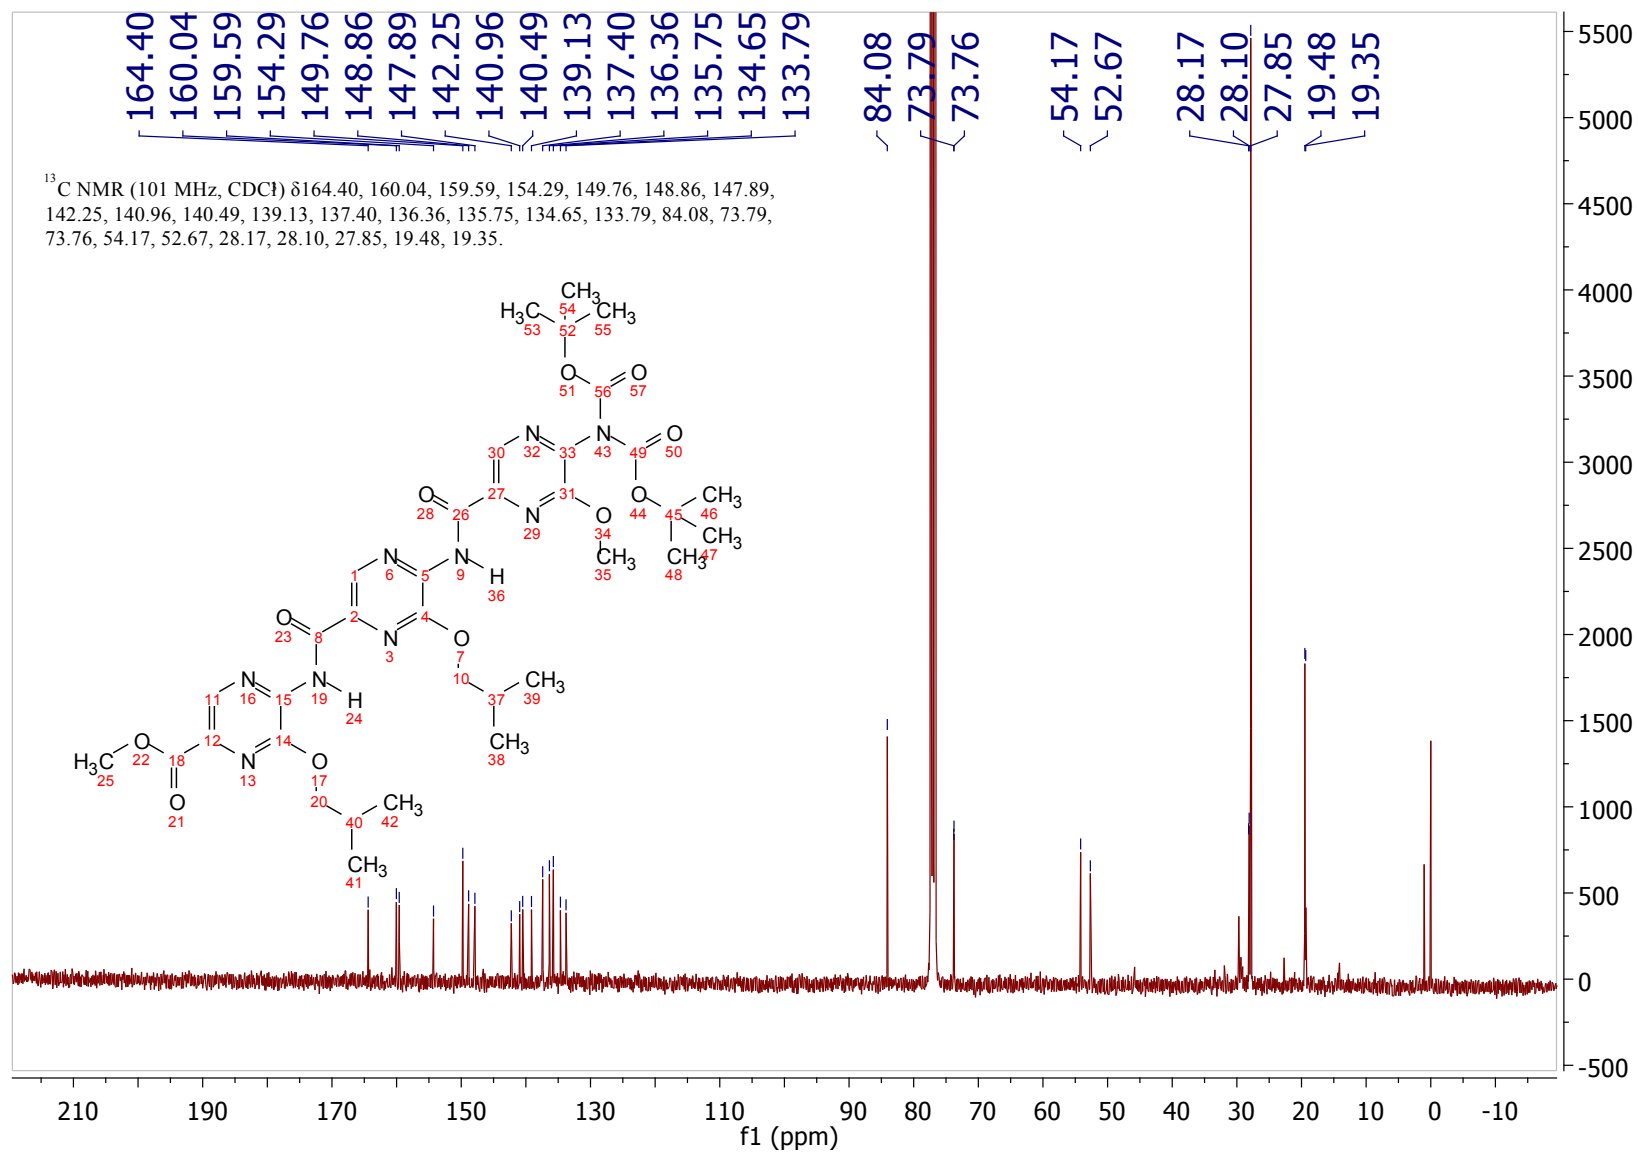

7d

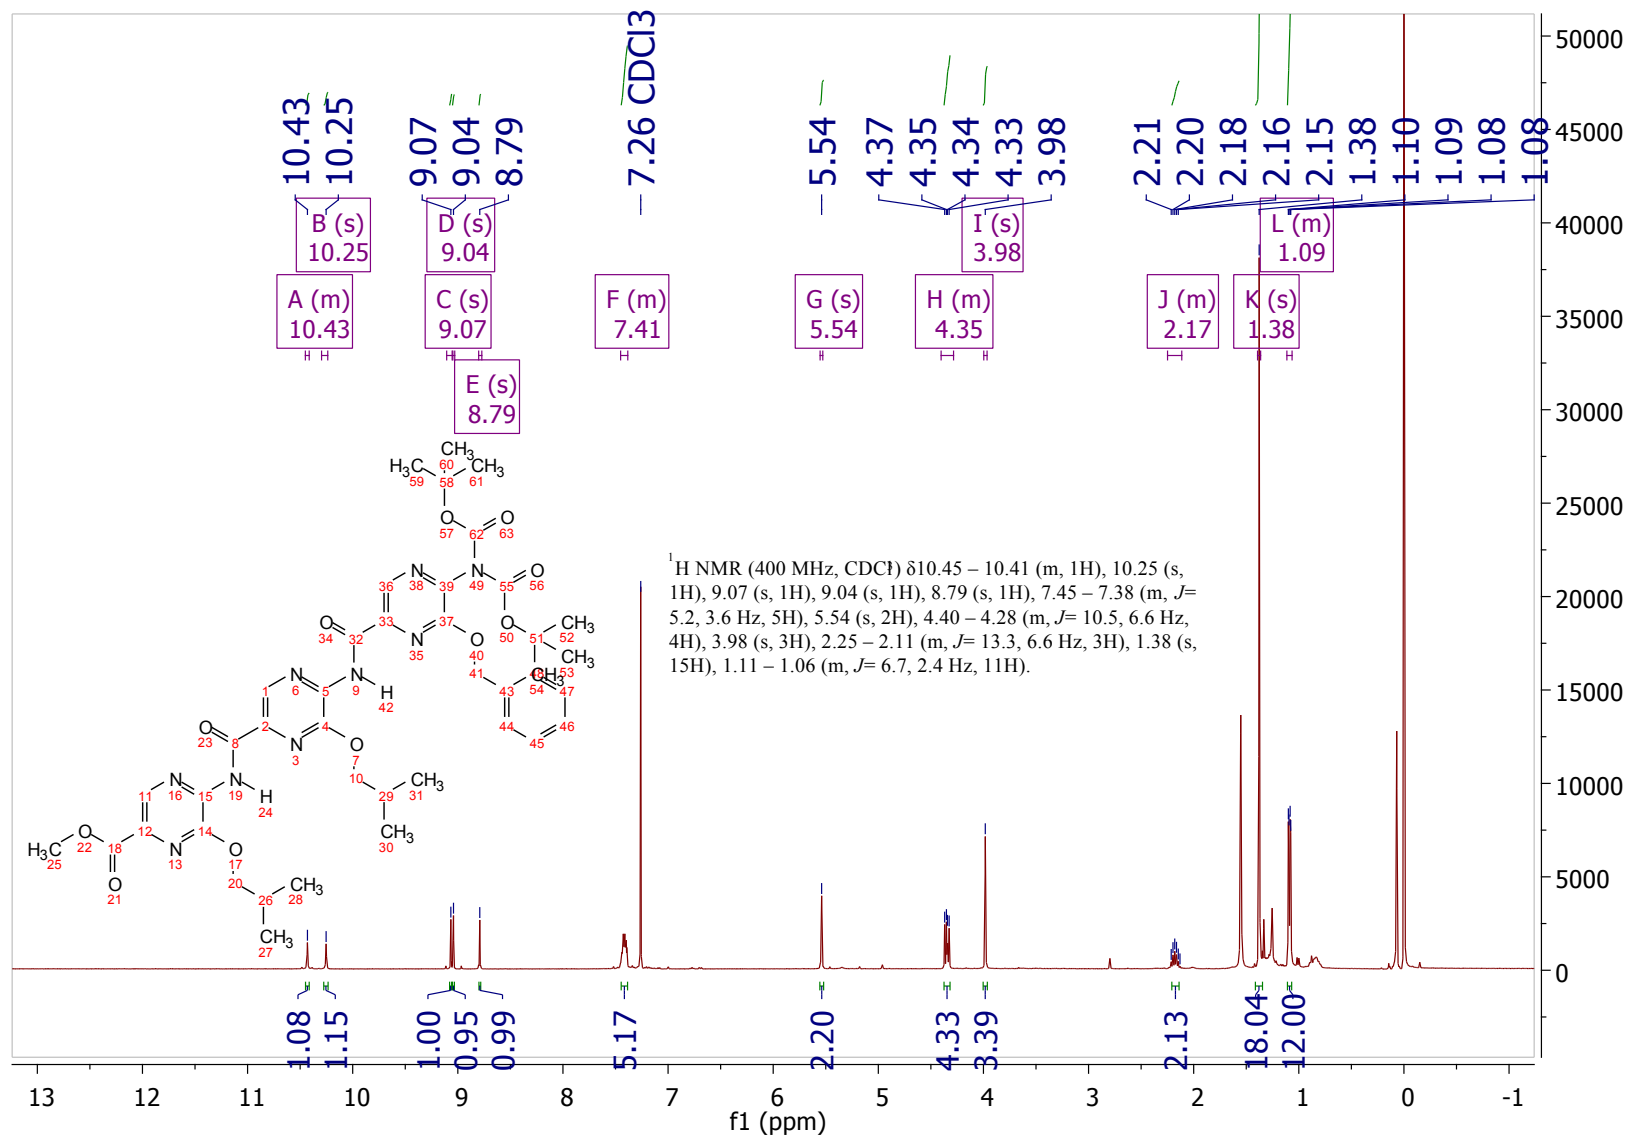

7d

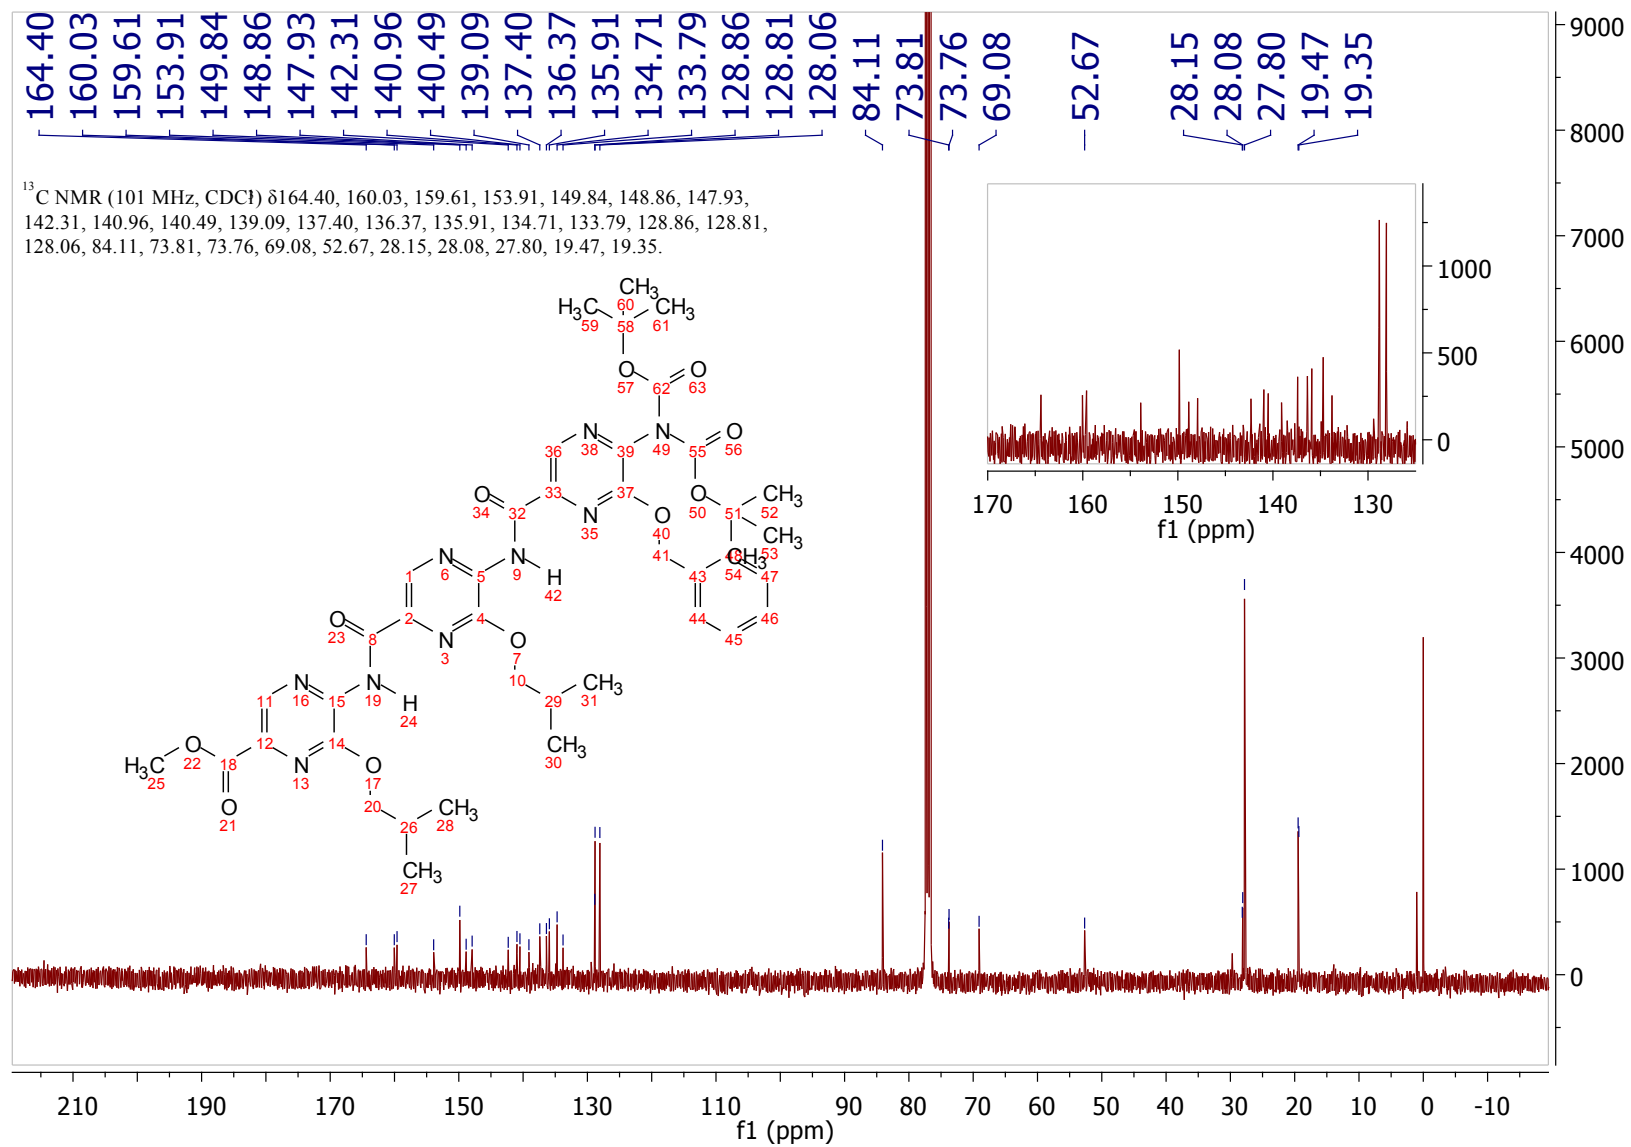



8a

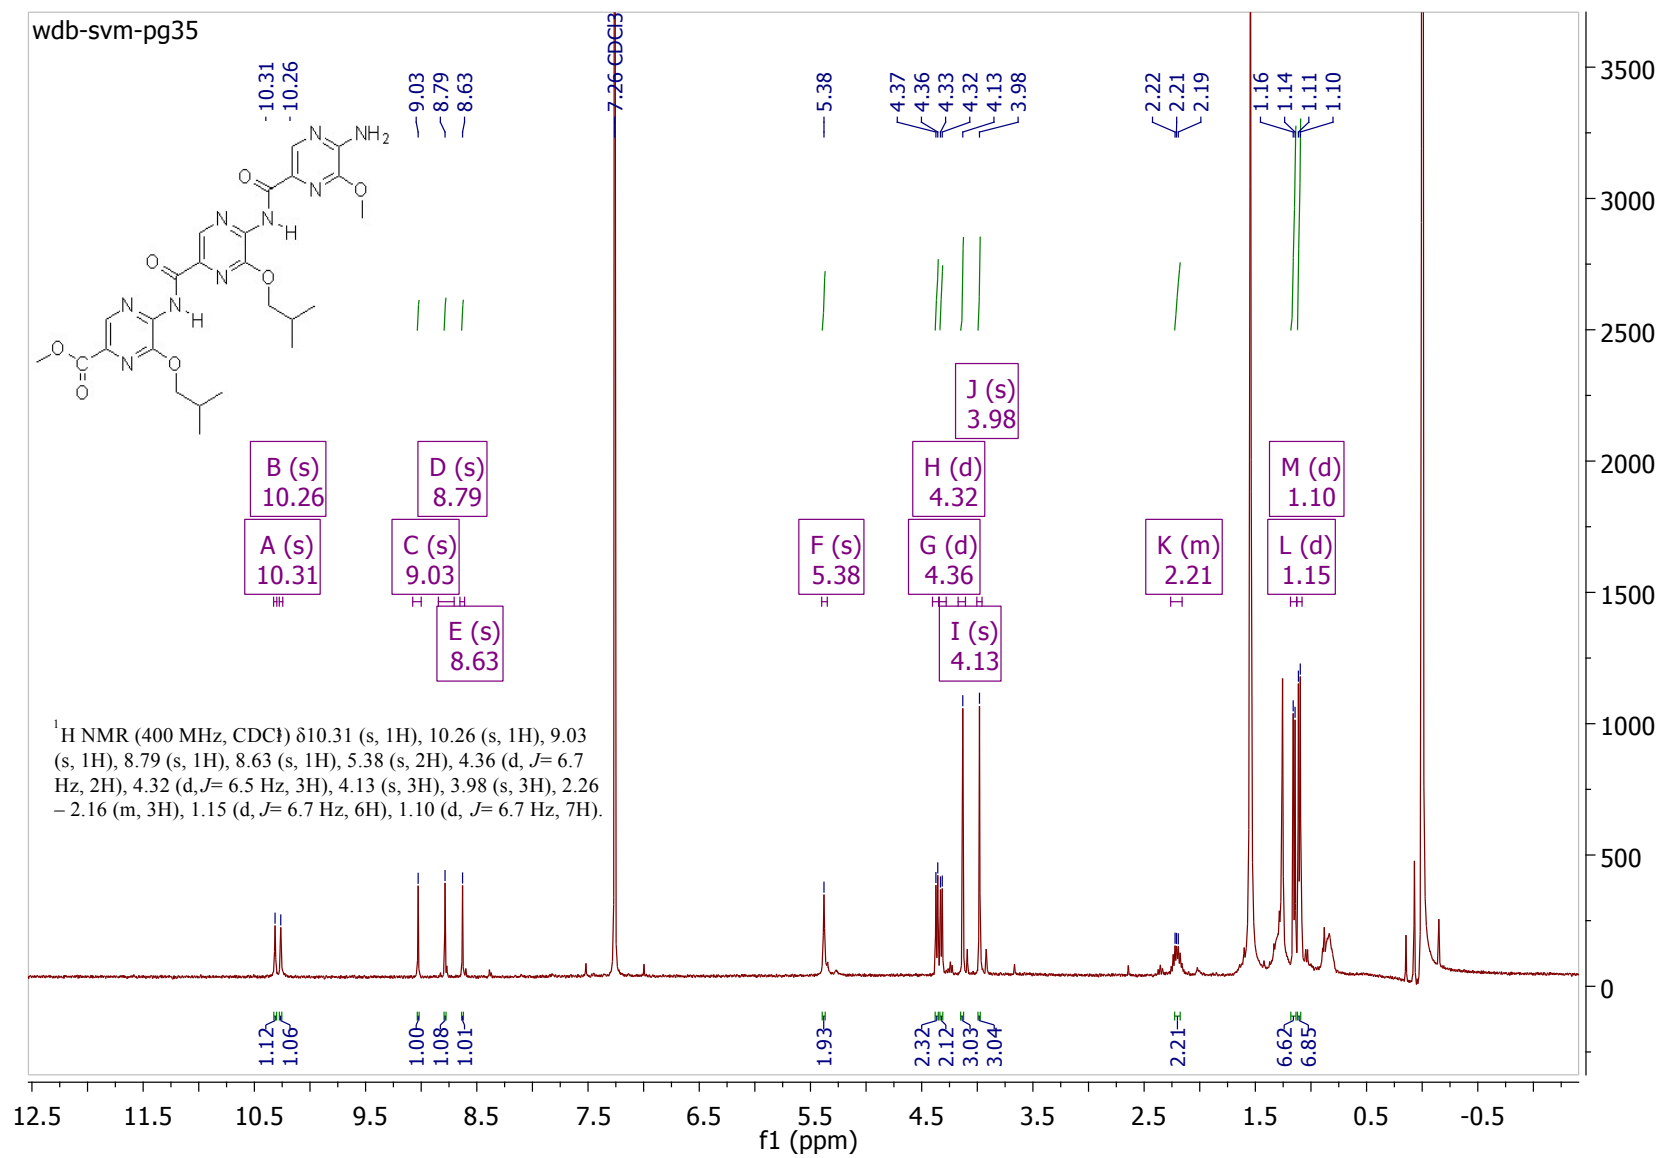

8b

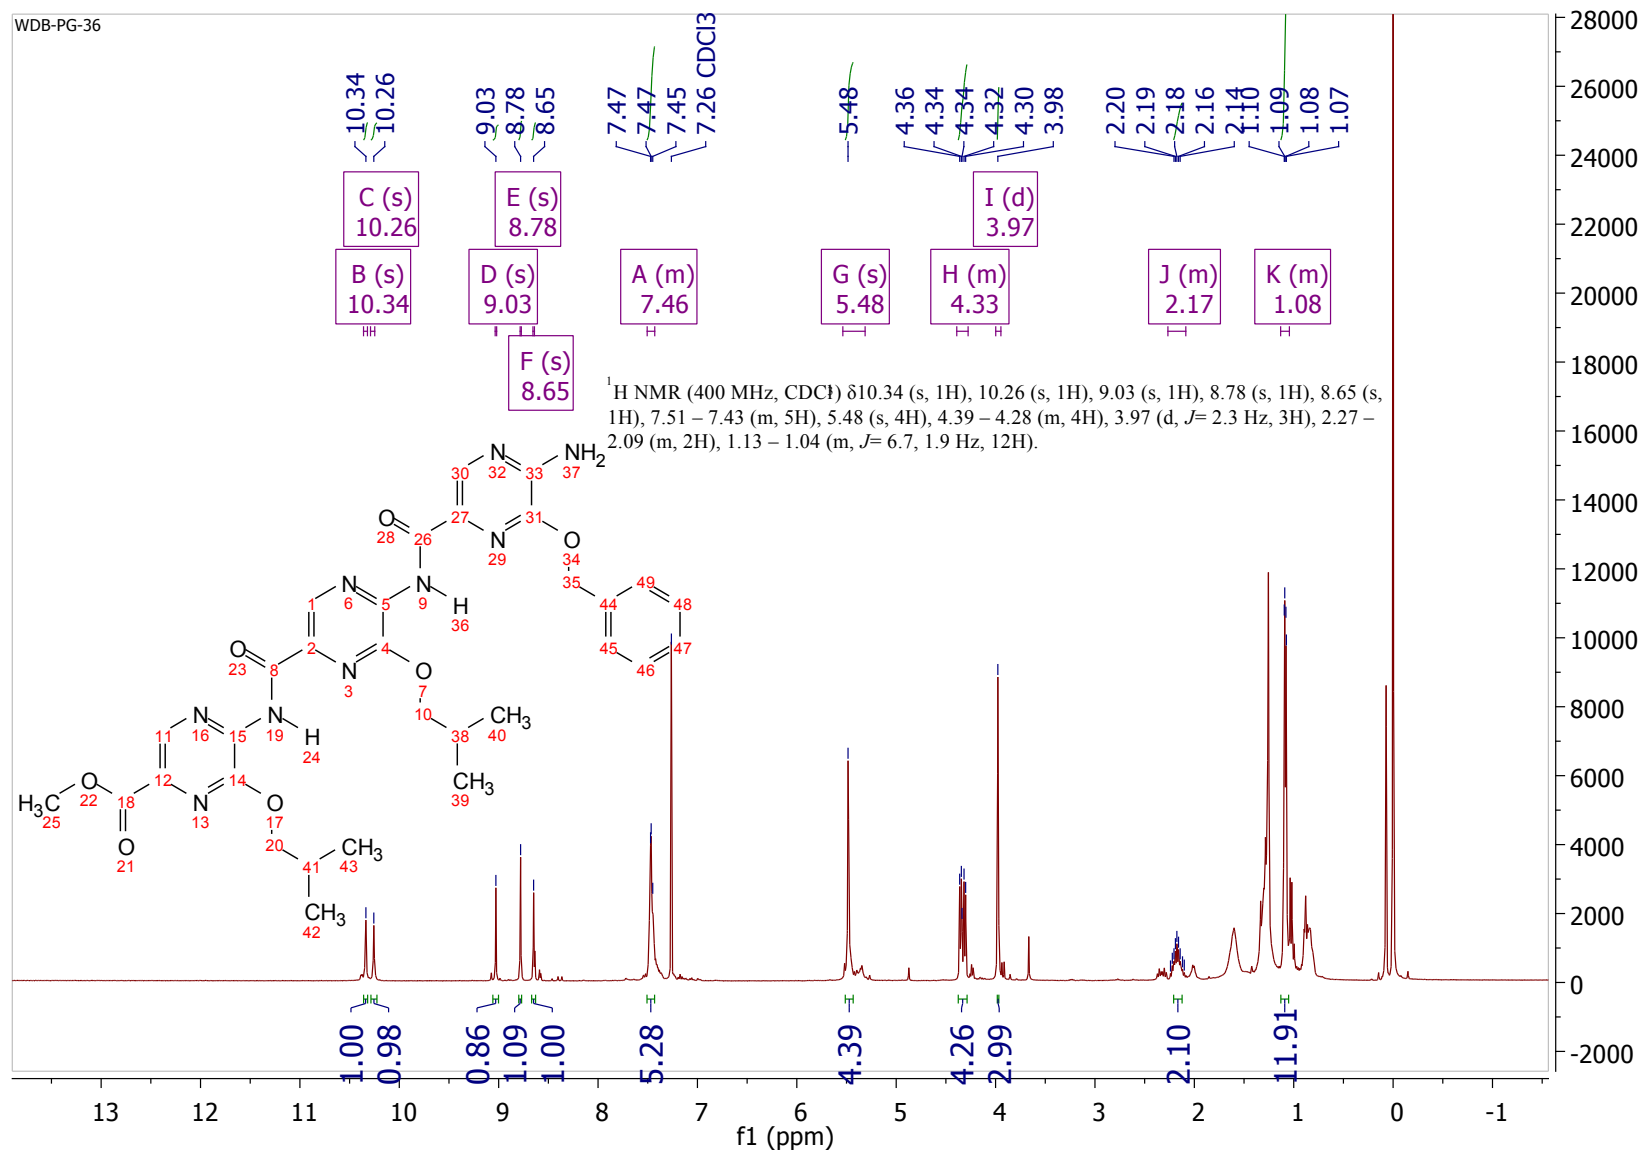

8b

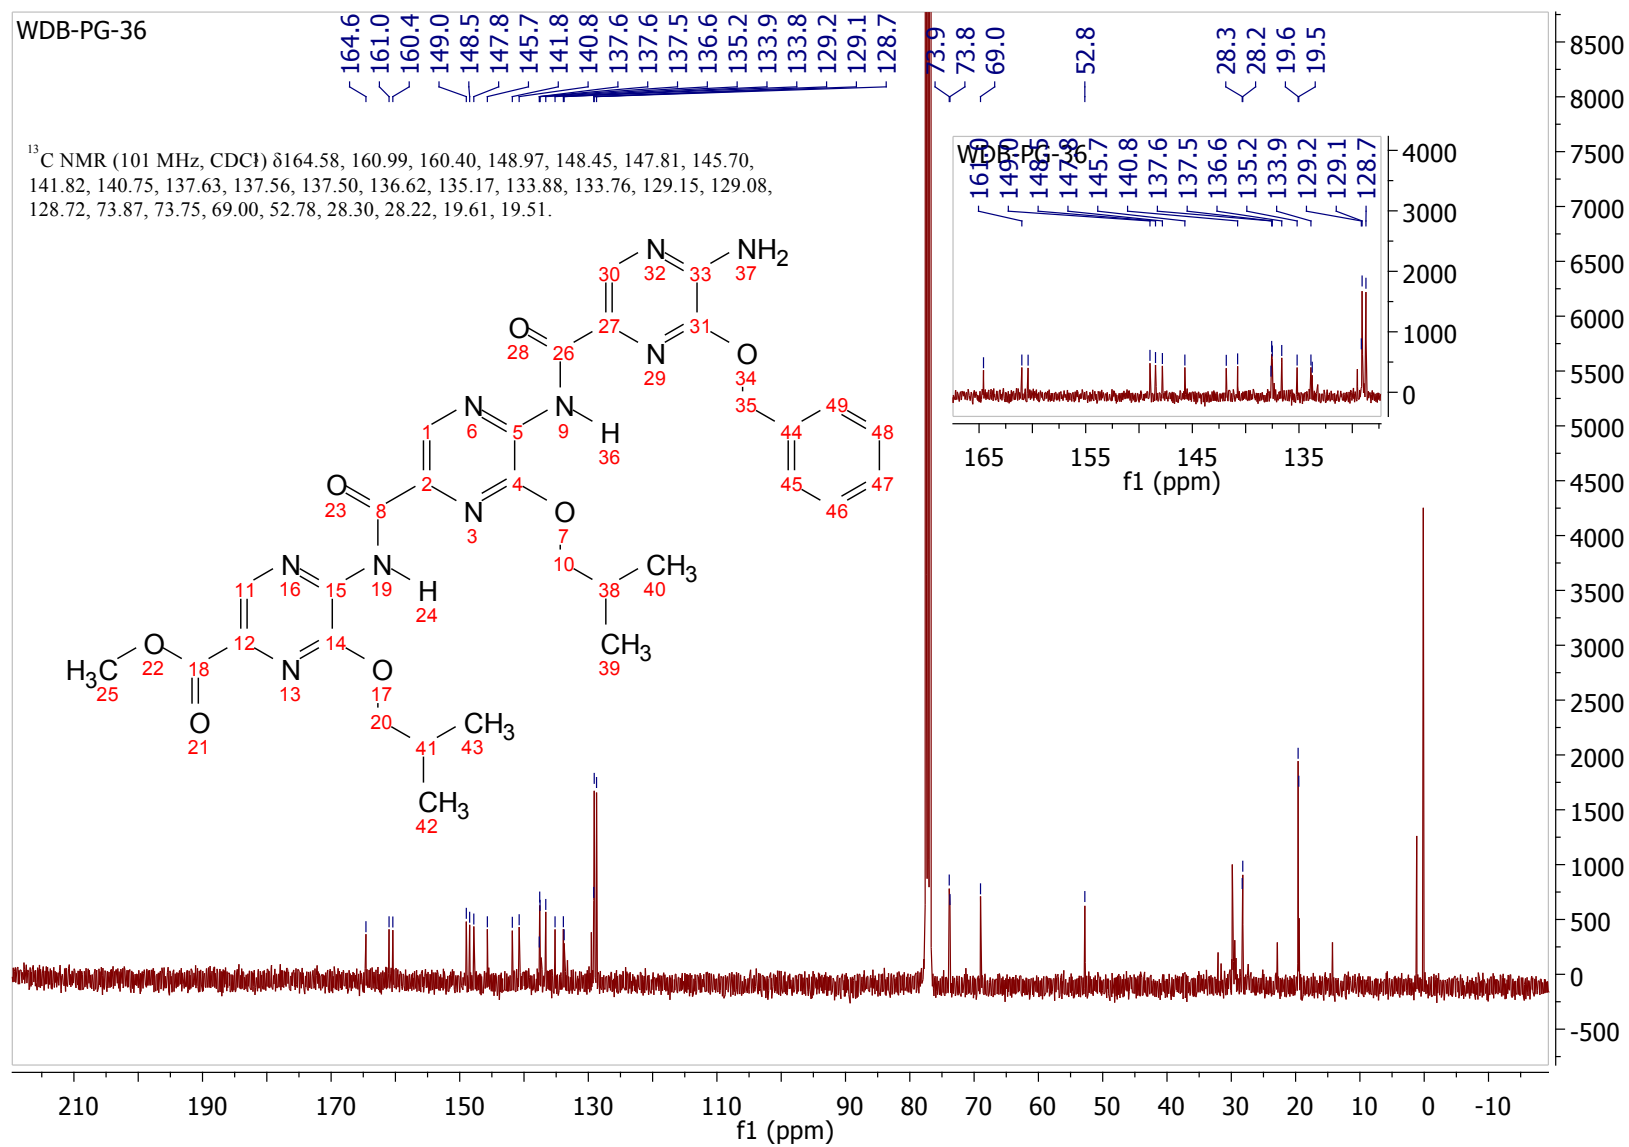

# 8b - NOESY

PG36 - Compound 8b

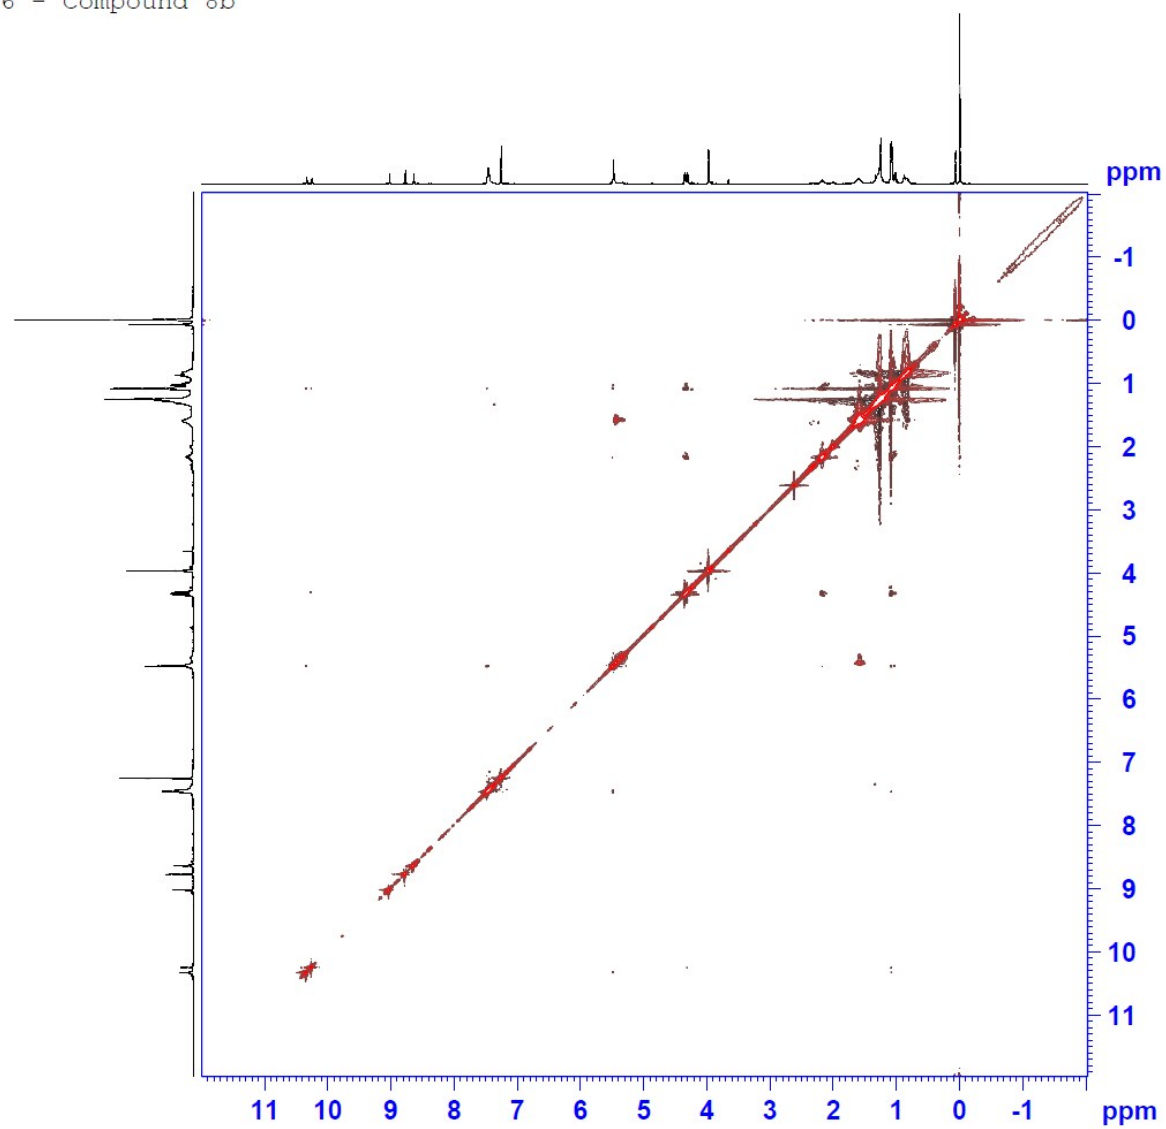

**8b – NOESY**

PG36 – Compound 8b

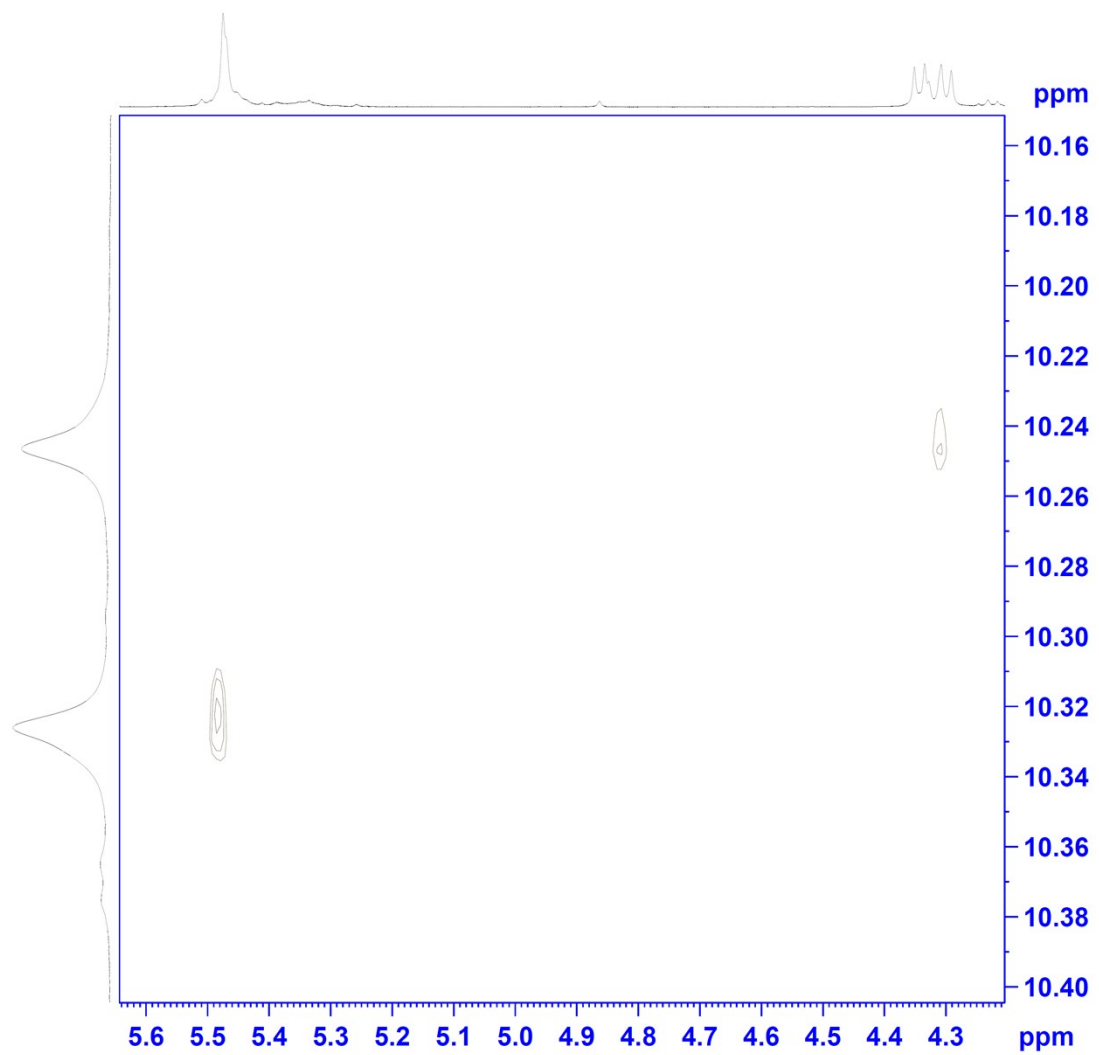

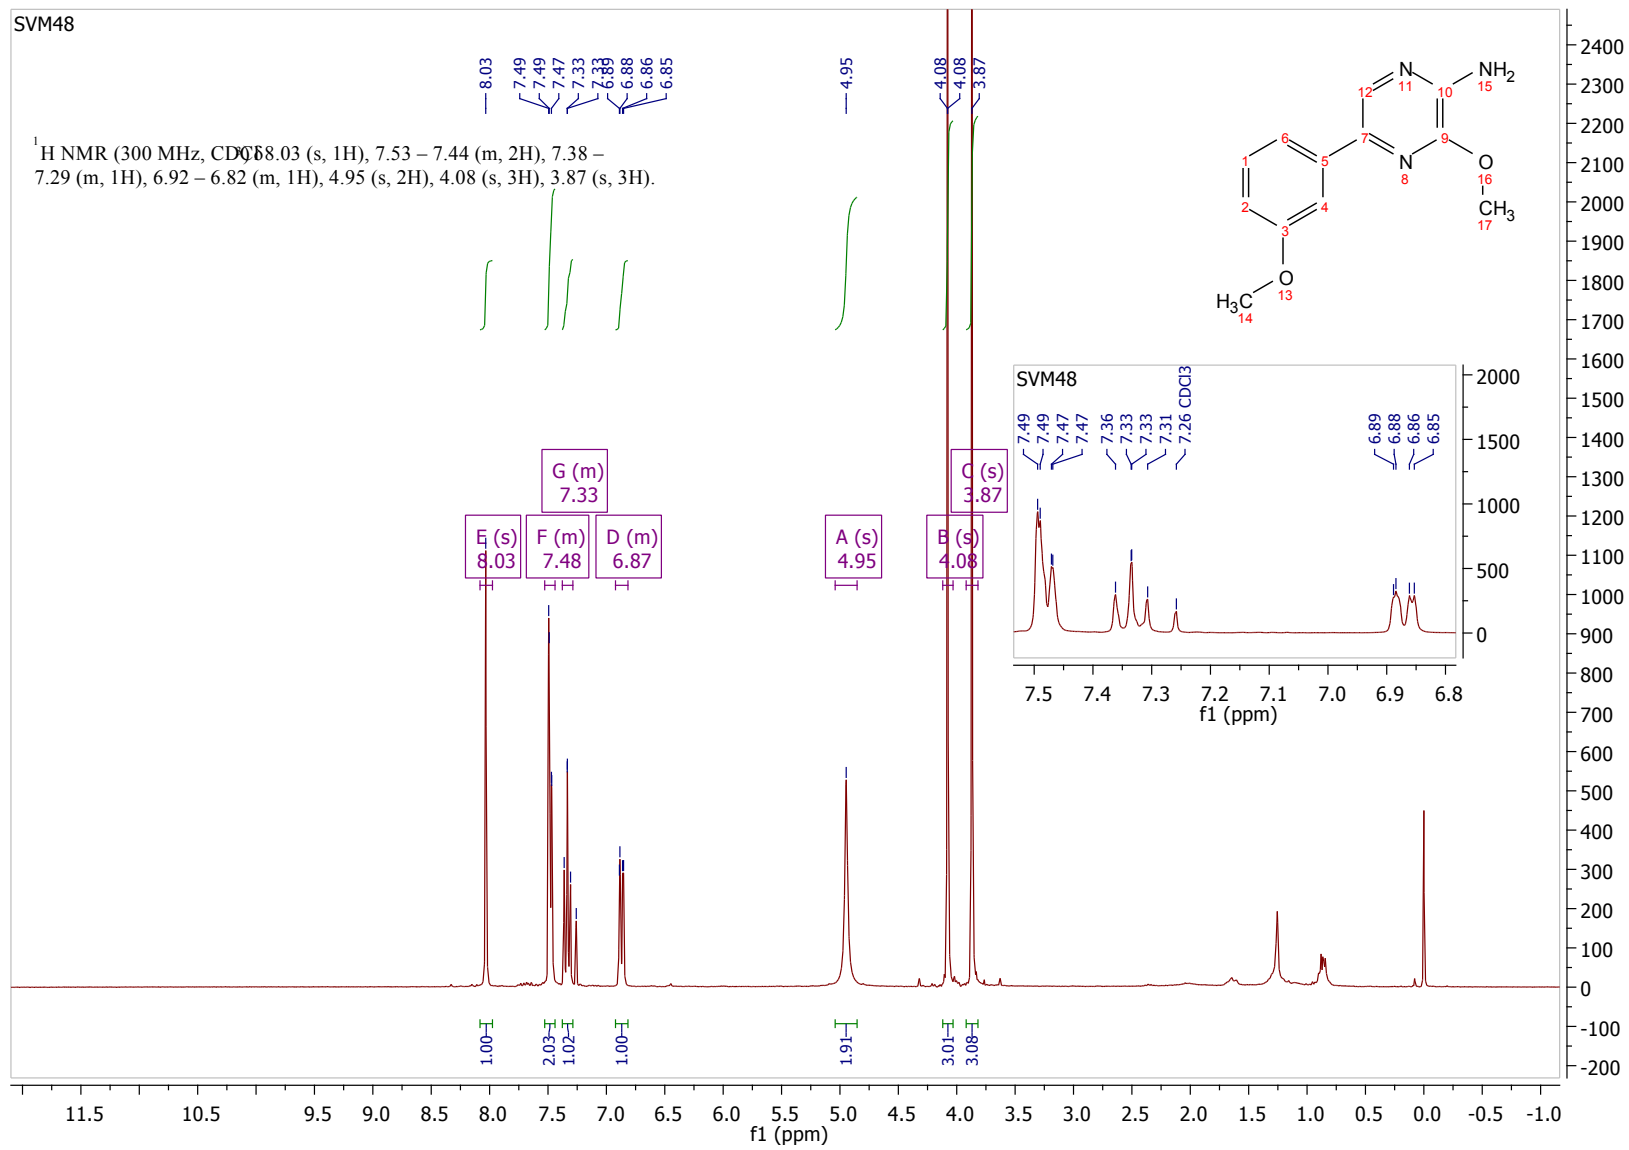

9

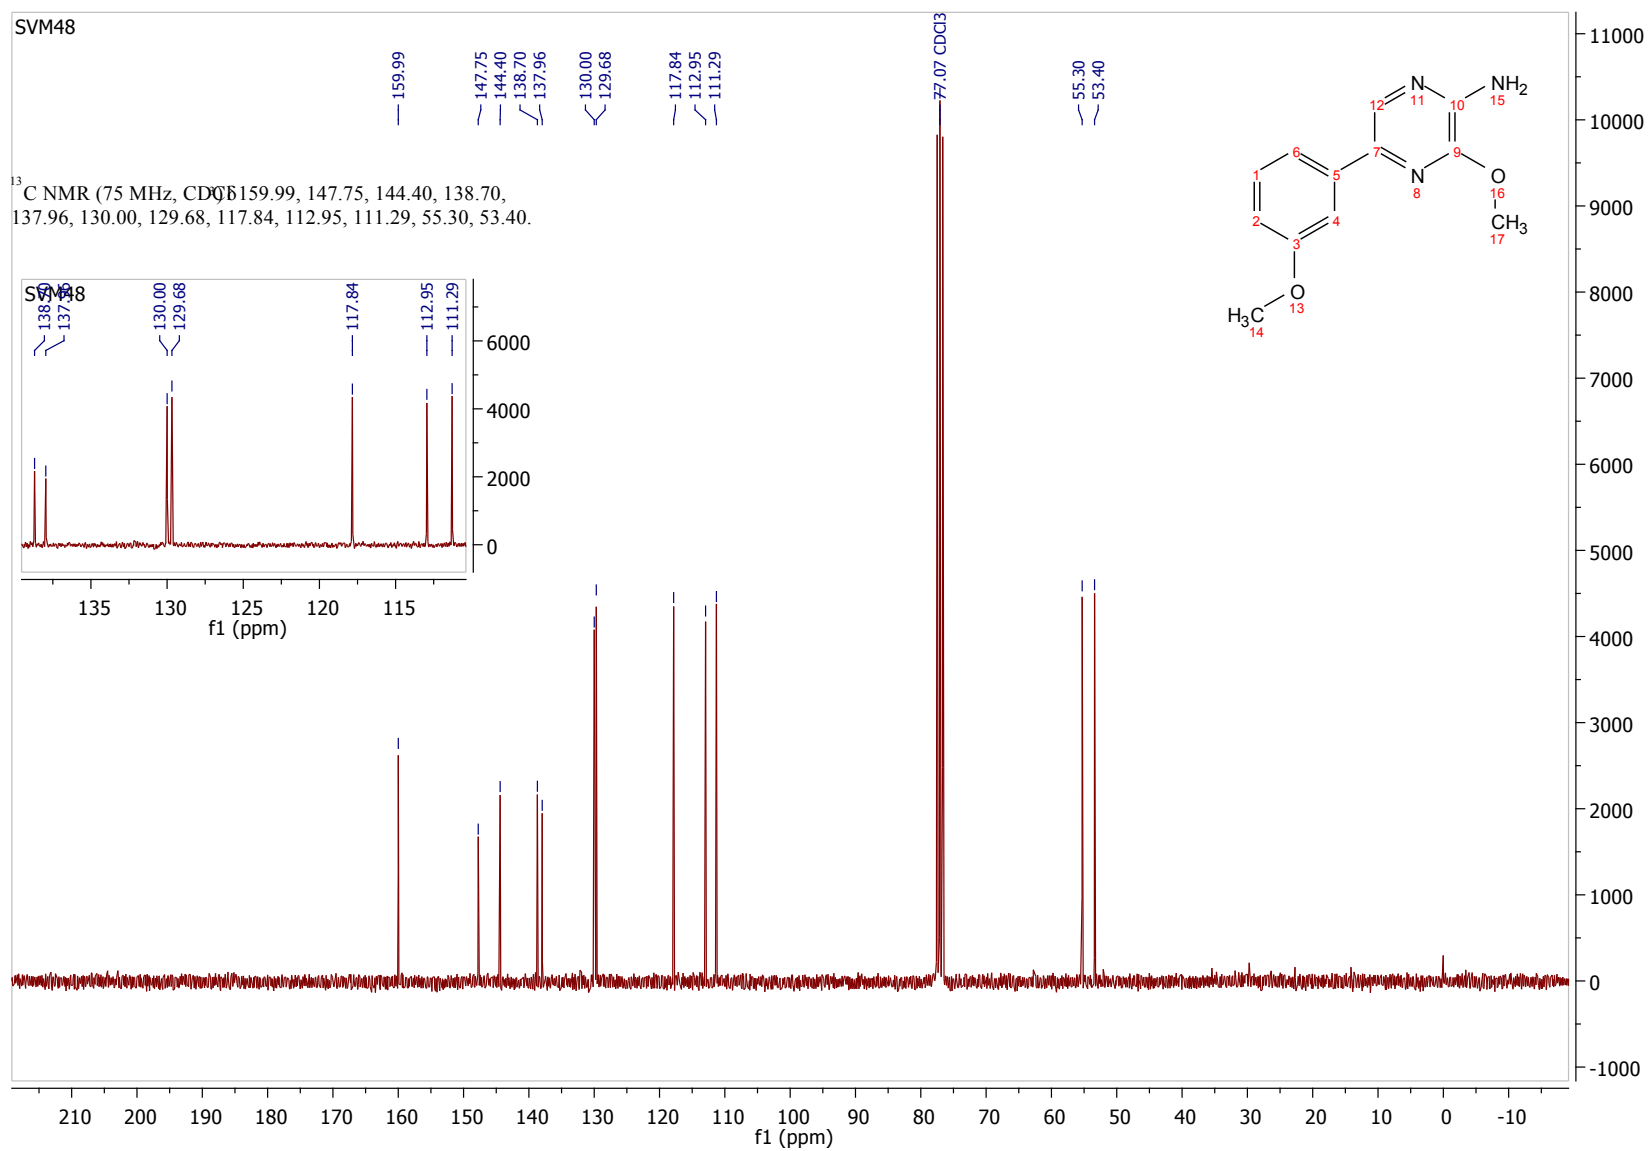

S95

di-*tert*-butyl [3-(benzyloxy)-5-([[3-methoxy-5-(3-methoxyphenyl)pyrazin-2-yl]amino]carbonyl)pyrazin-2-yl]imidodicarbonate

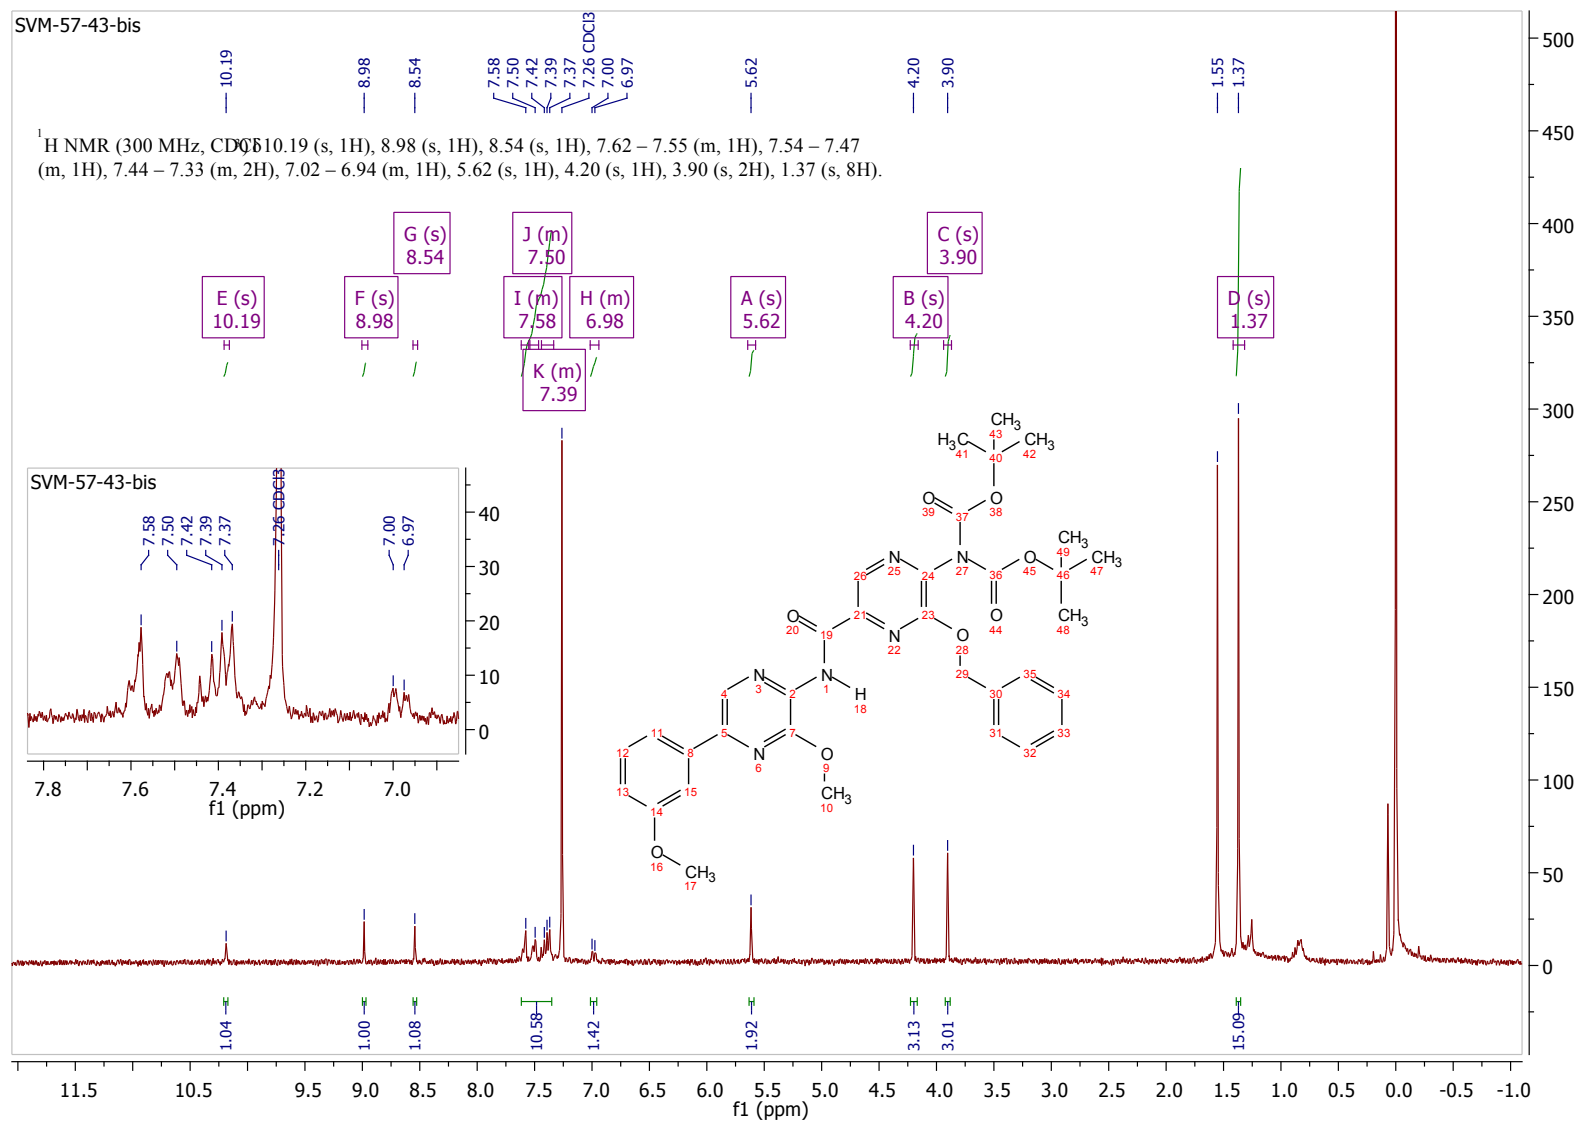



**di-*tert*-butyl [3-(benzyloxy)-5-([[3-methoxy-5-(3-methoxyphenyl)pyrazin-2-yl]amino]carbonyl)pyrazin-2-yl]imidodicarbonate**

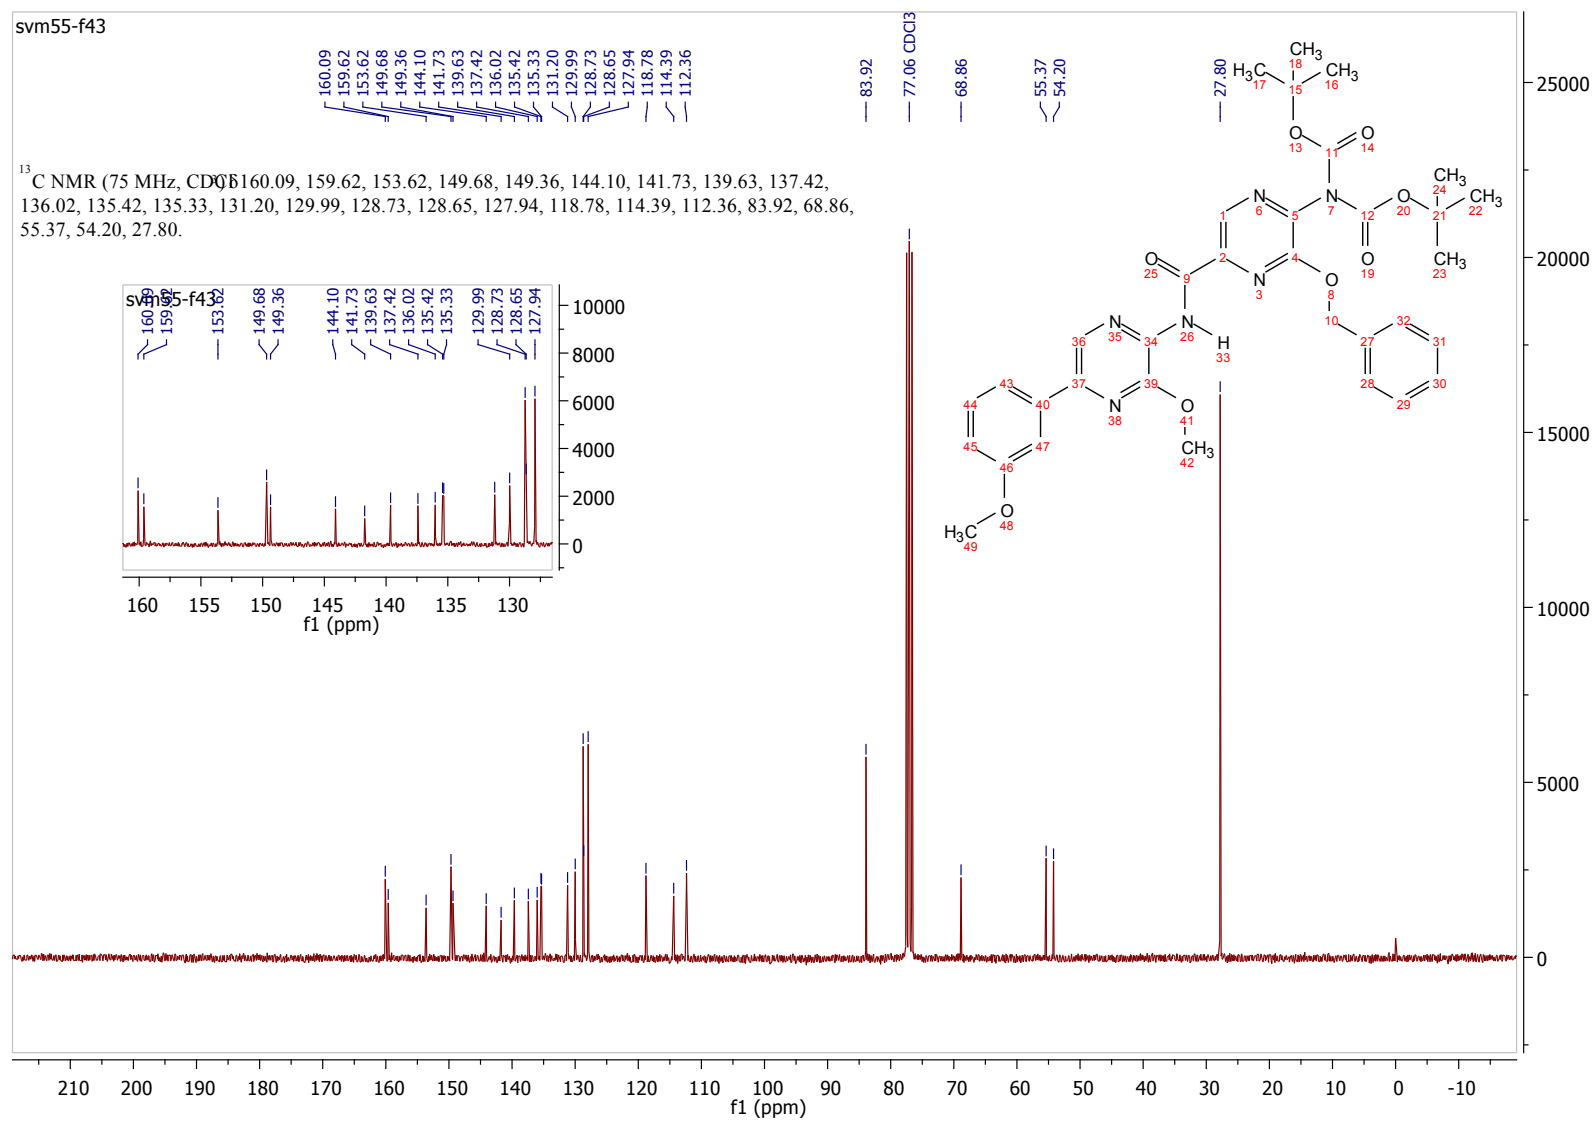

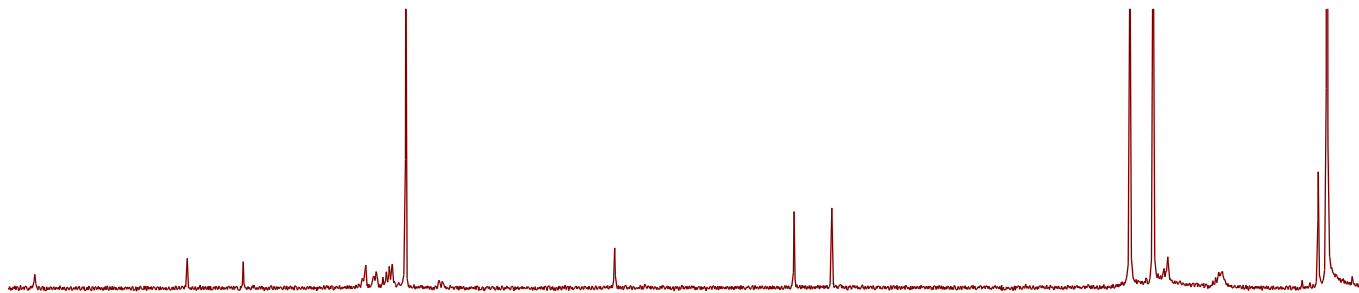

SVM55 F3 hsqc 18feb2015.400

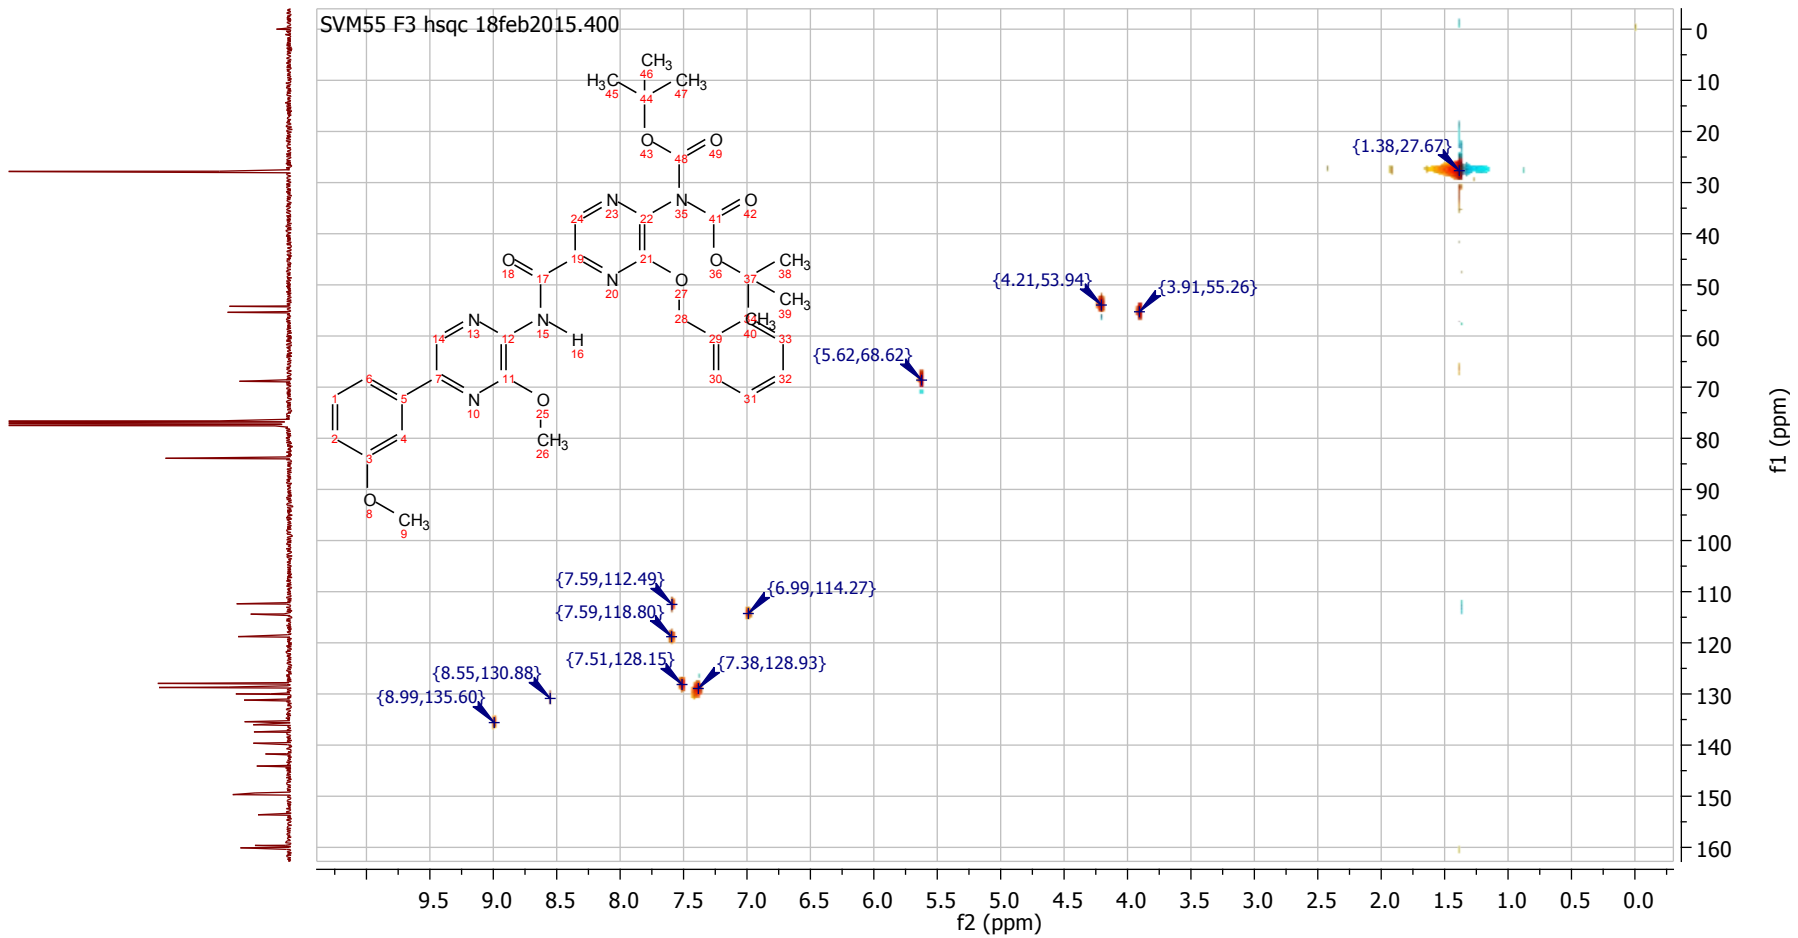

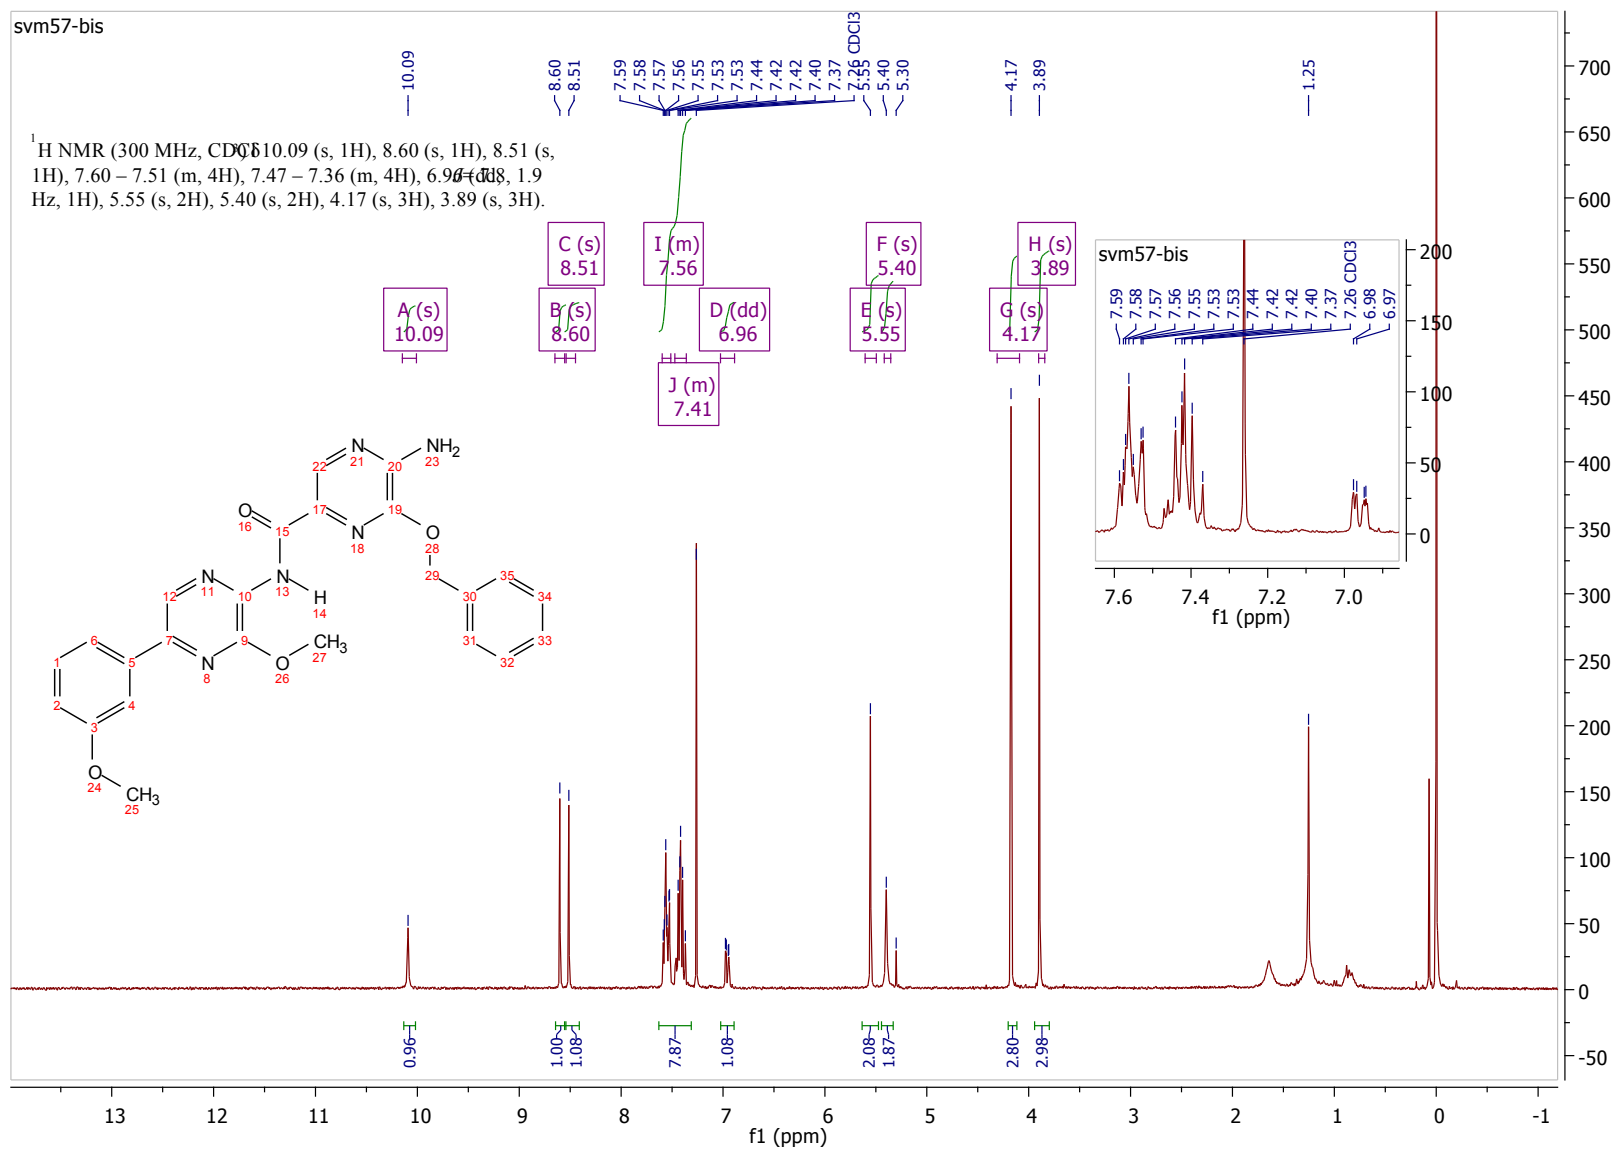

10

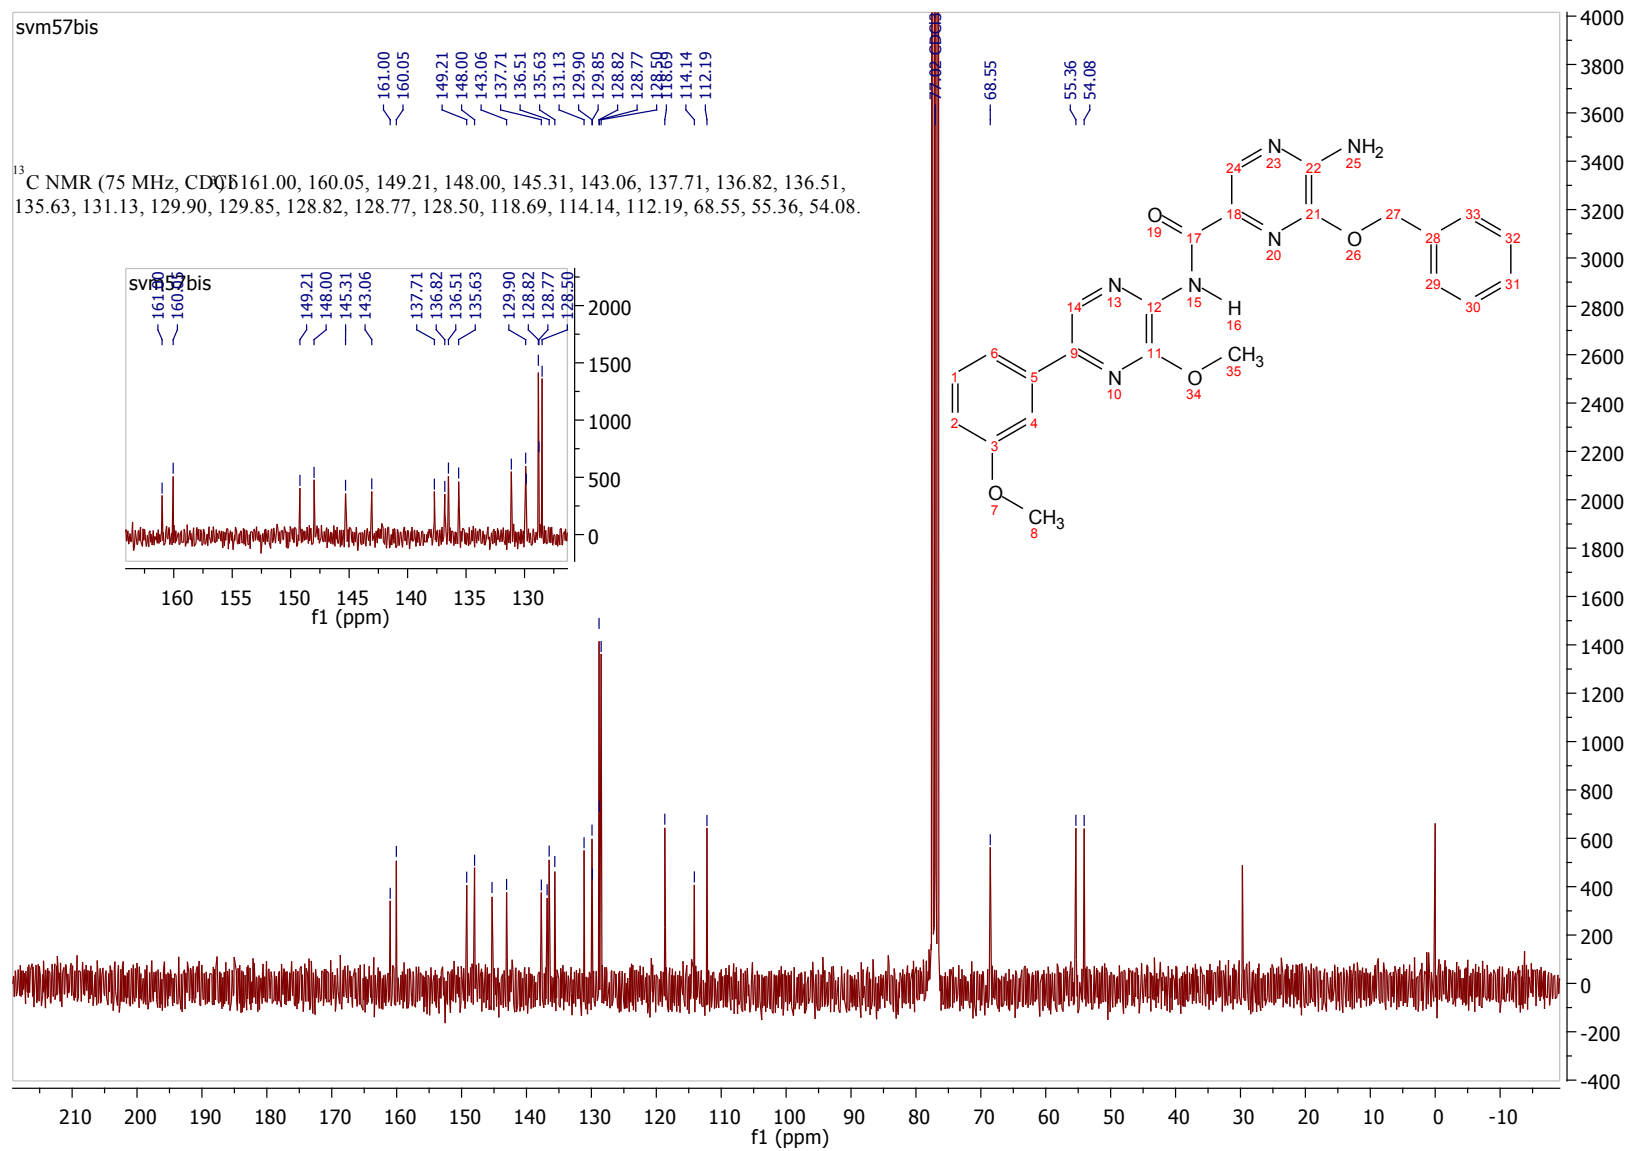

S100

12

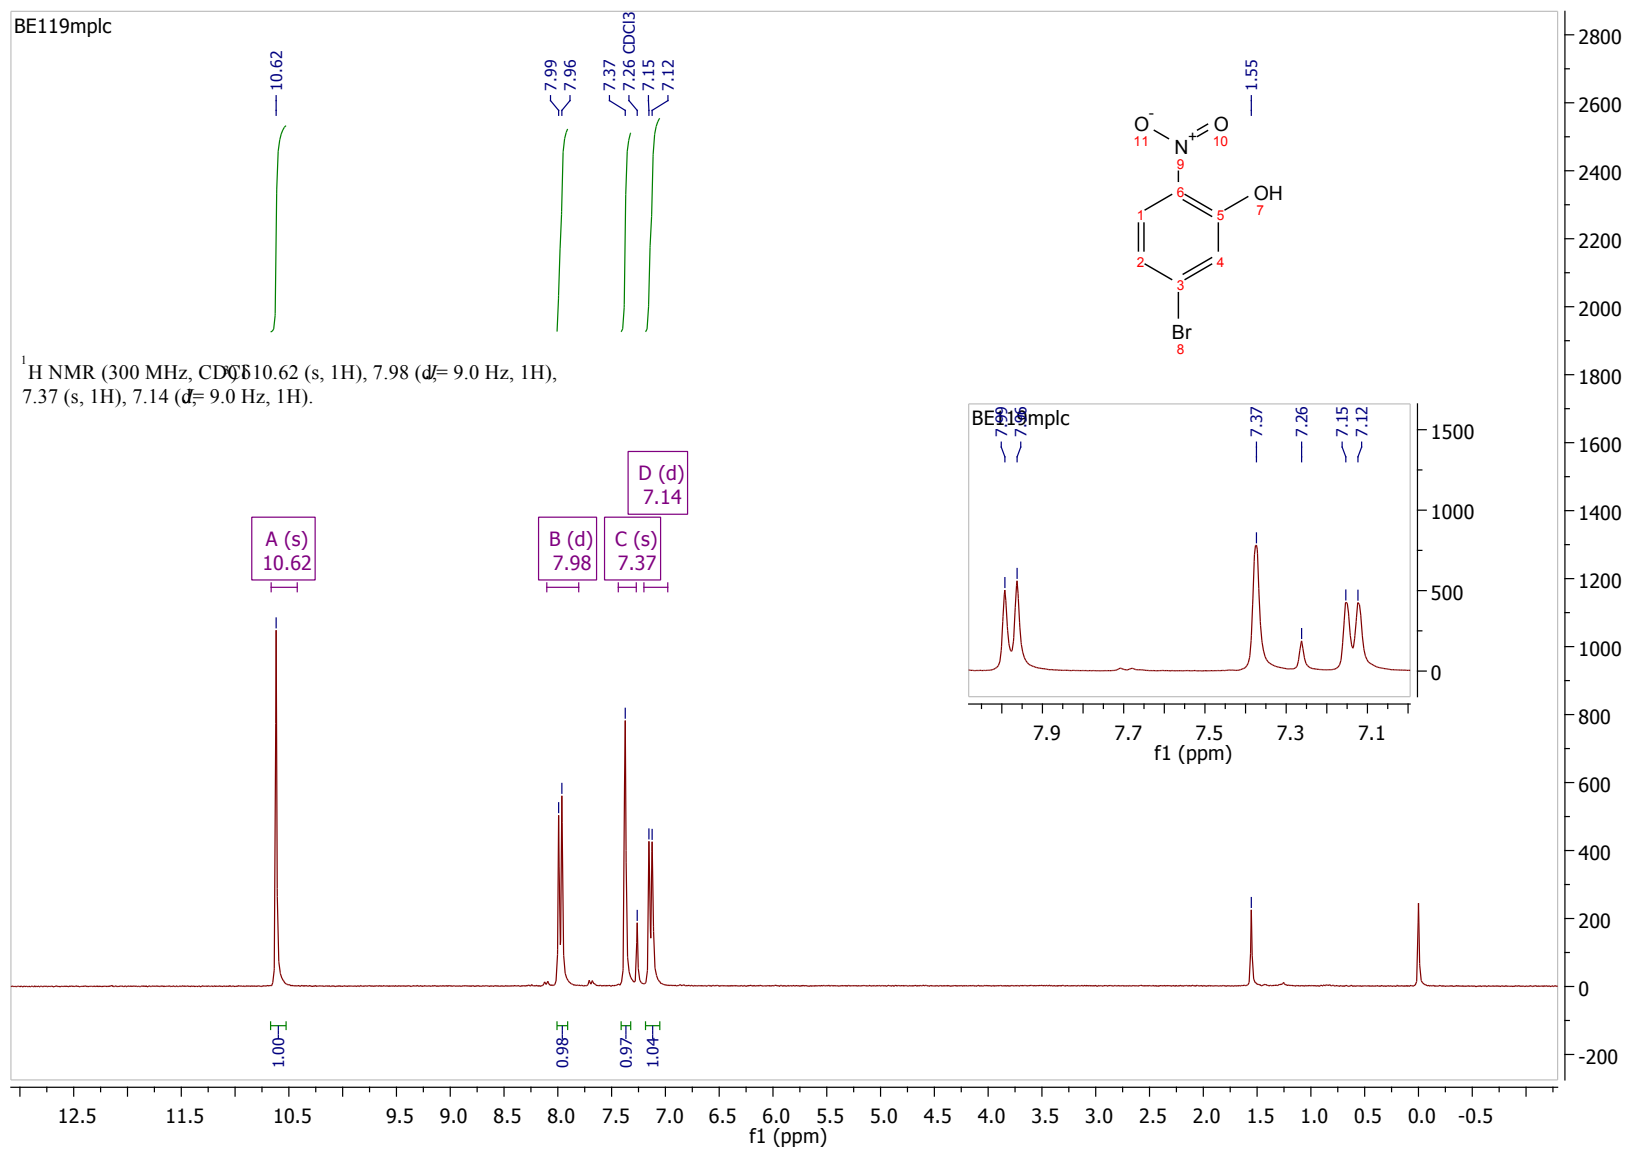

12

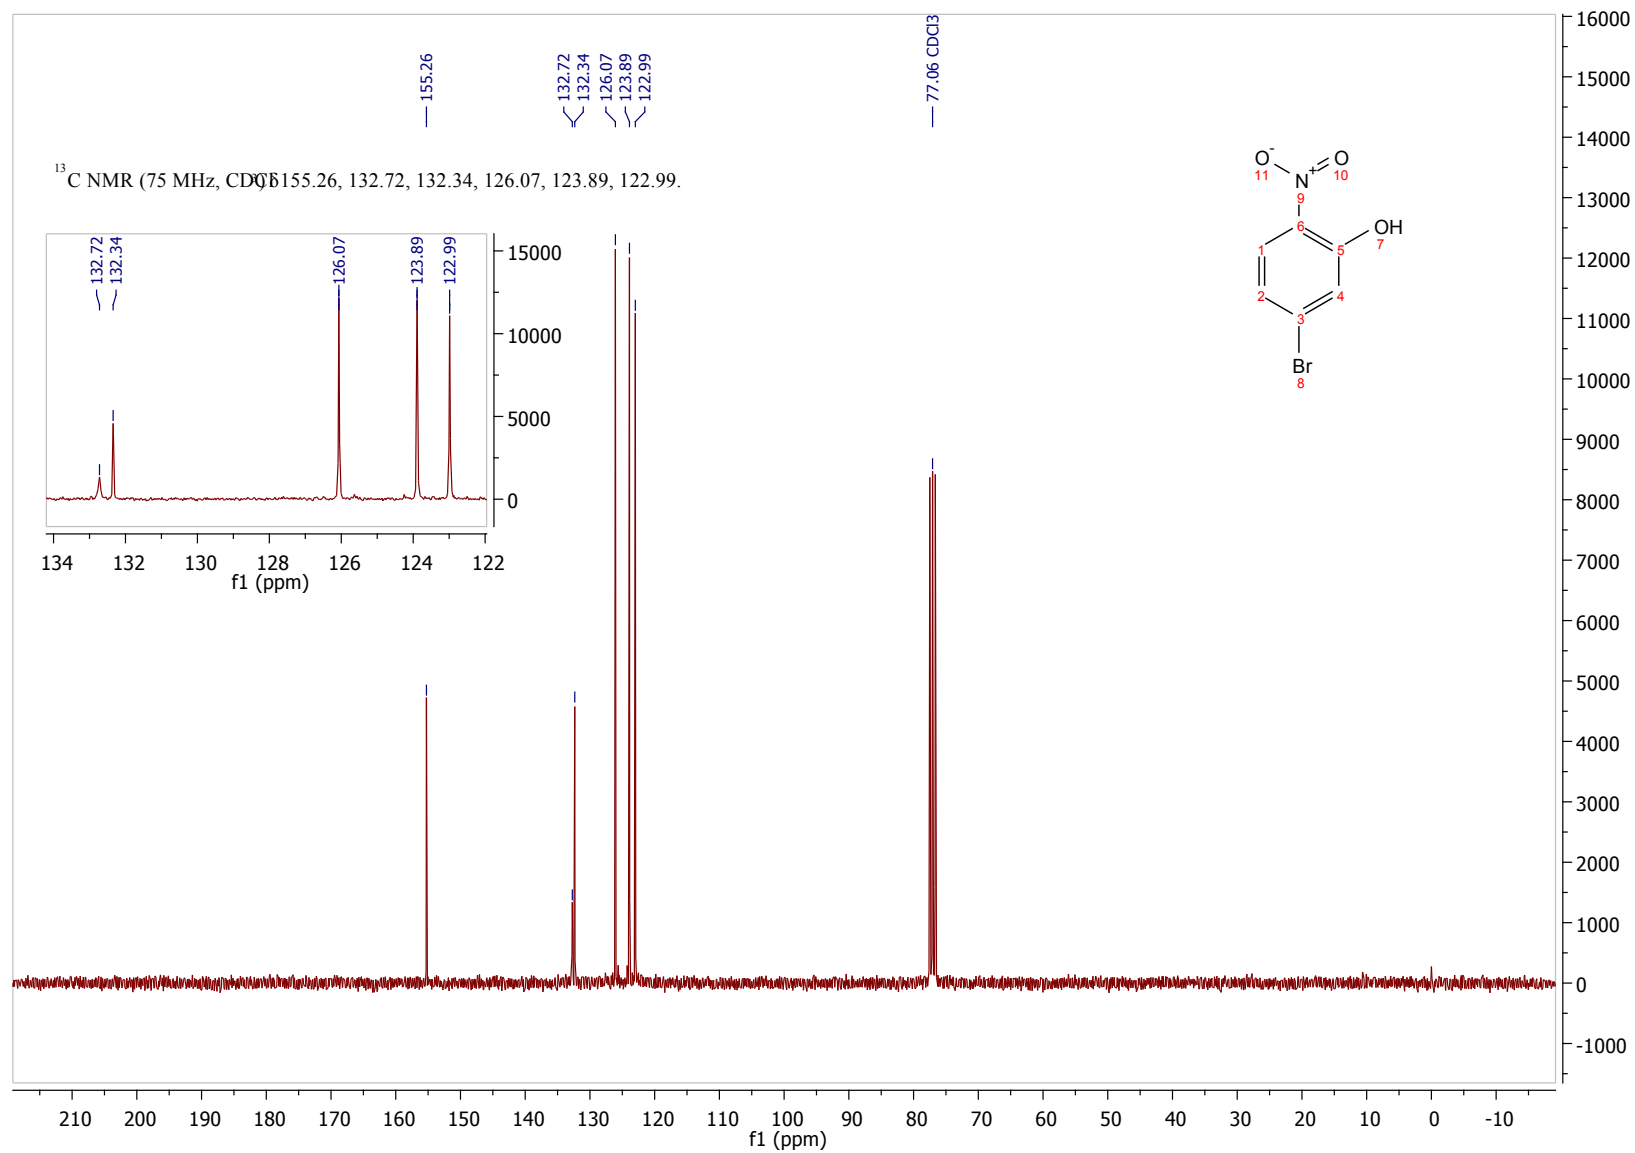

S102

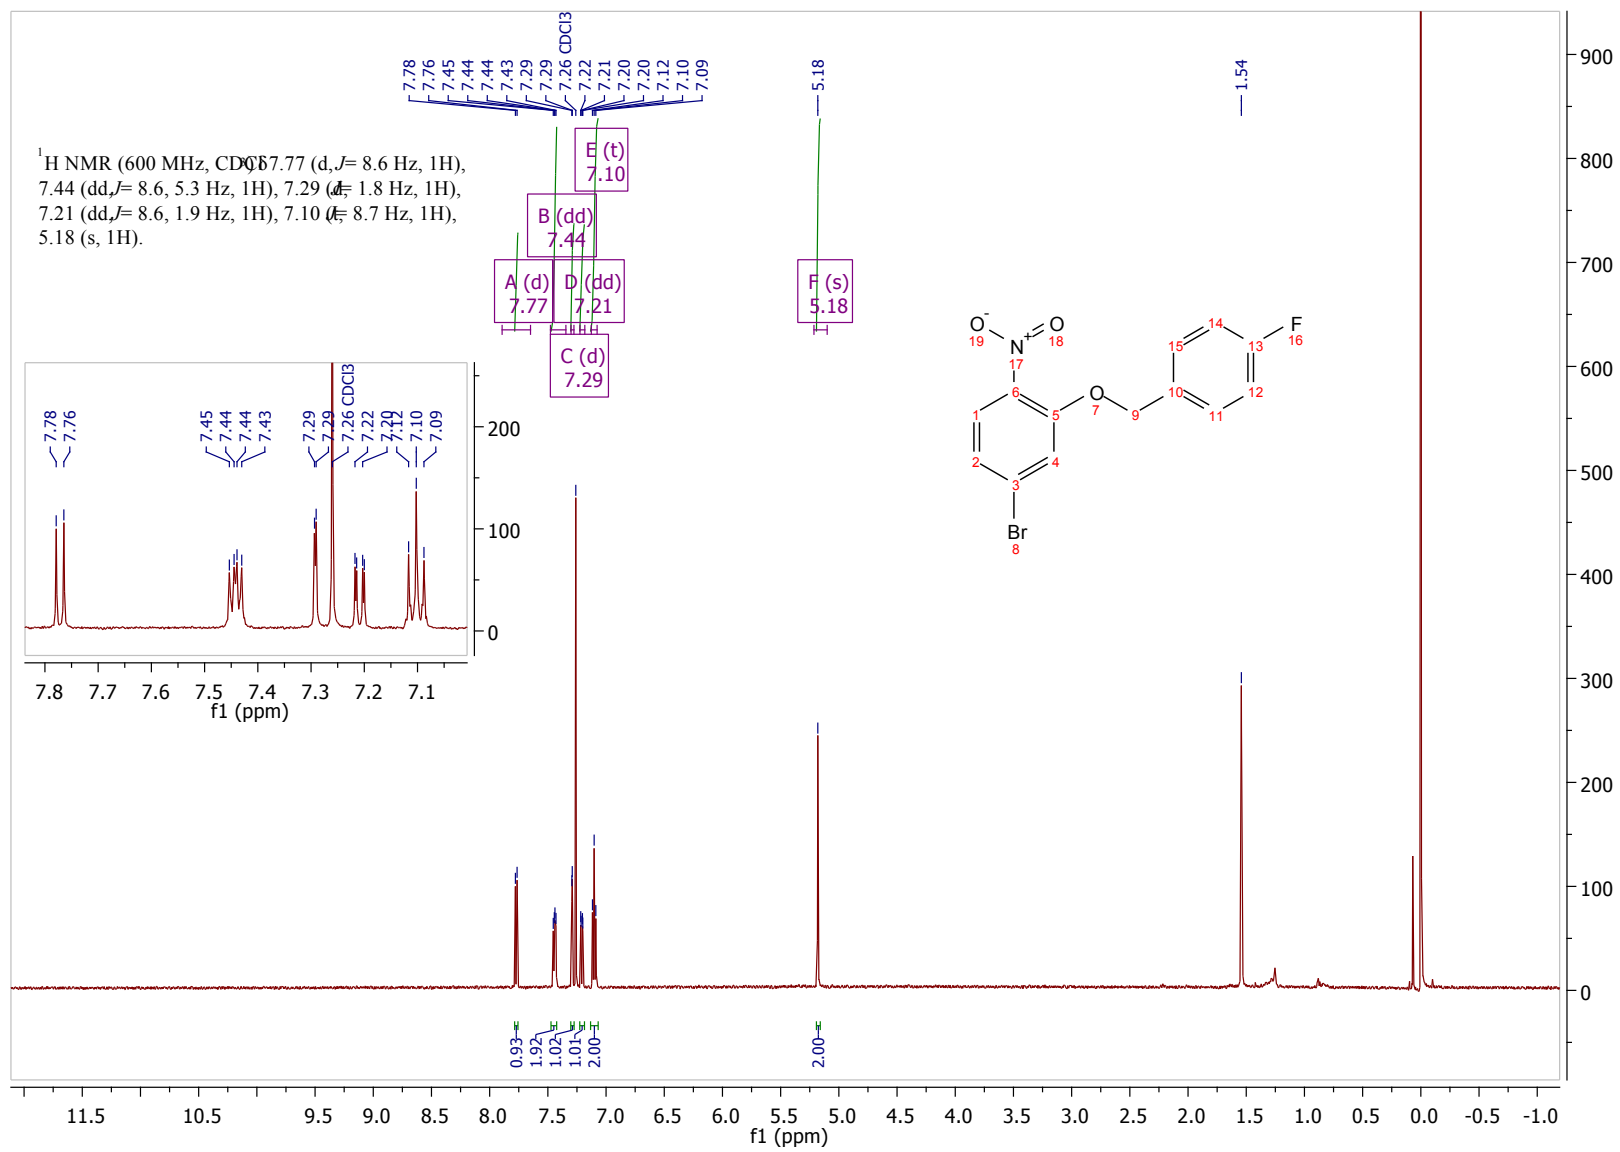

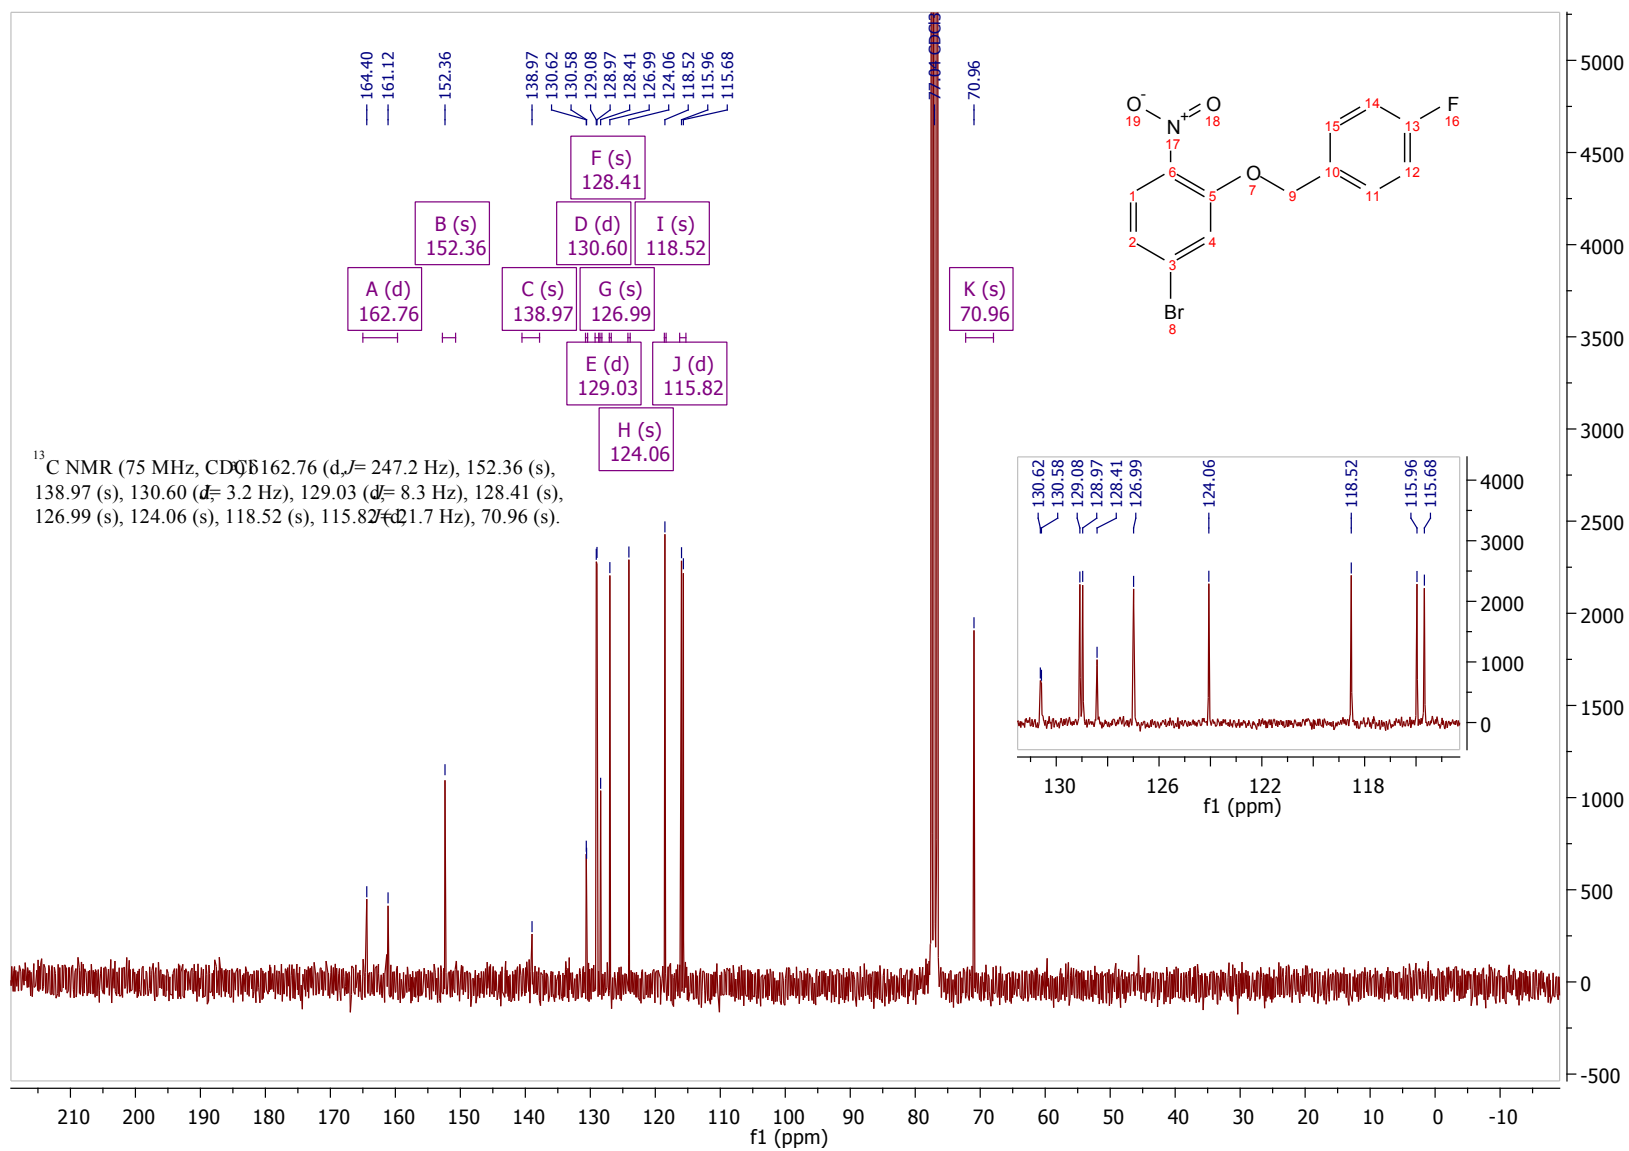



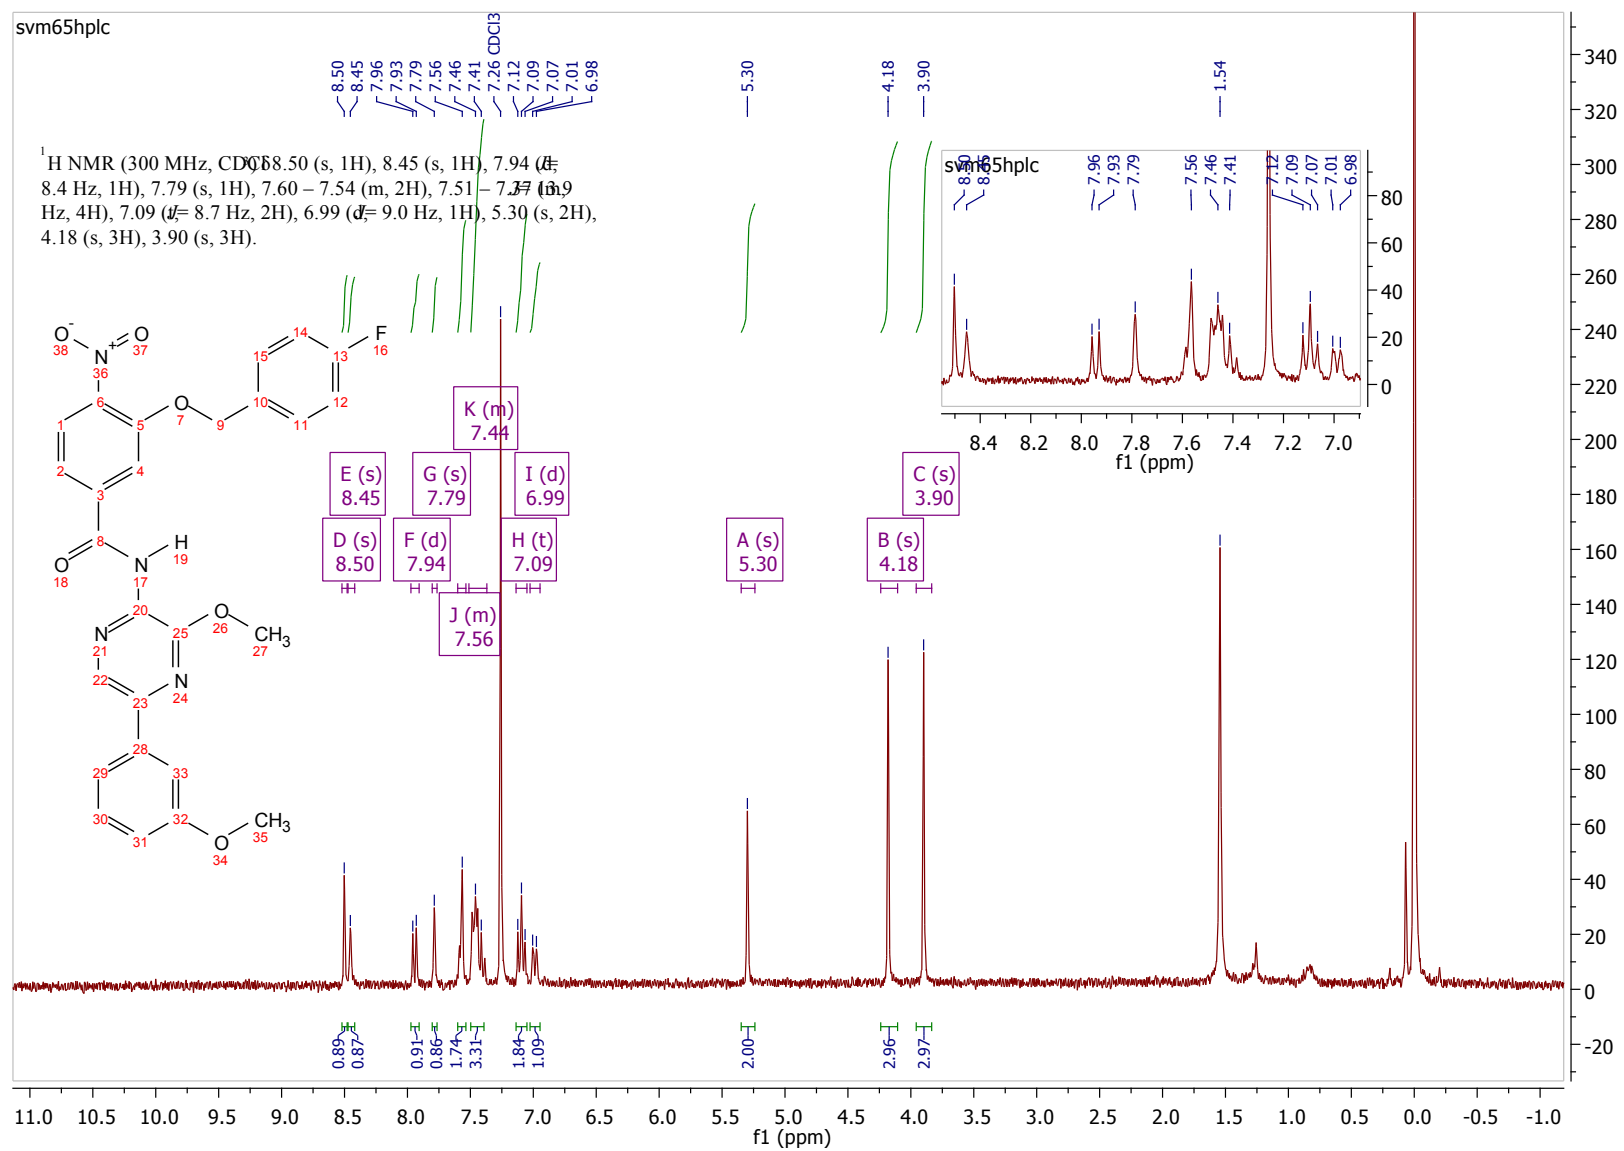

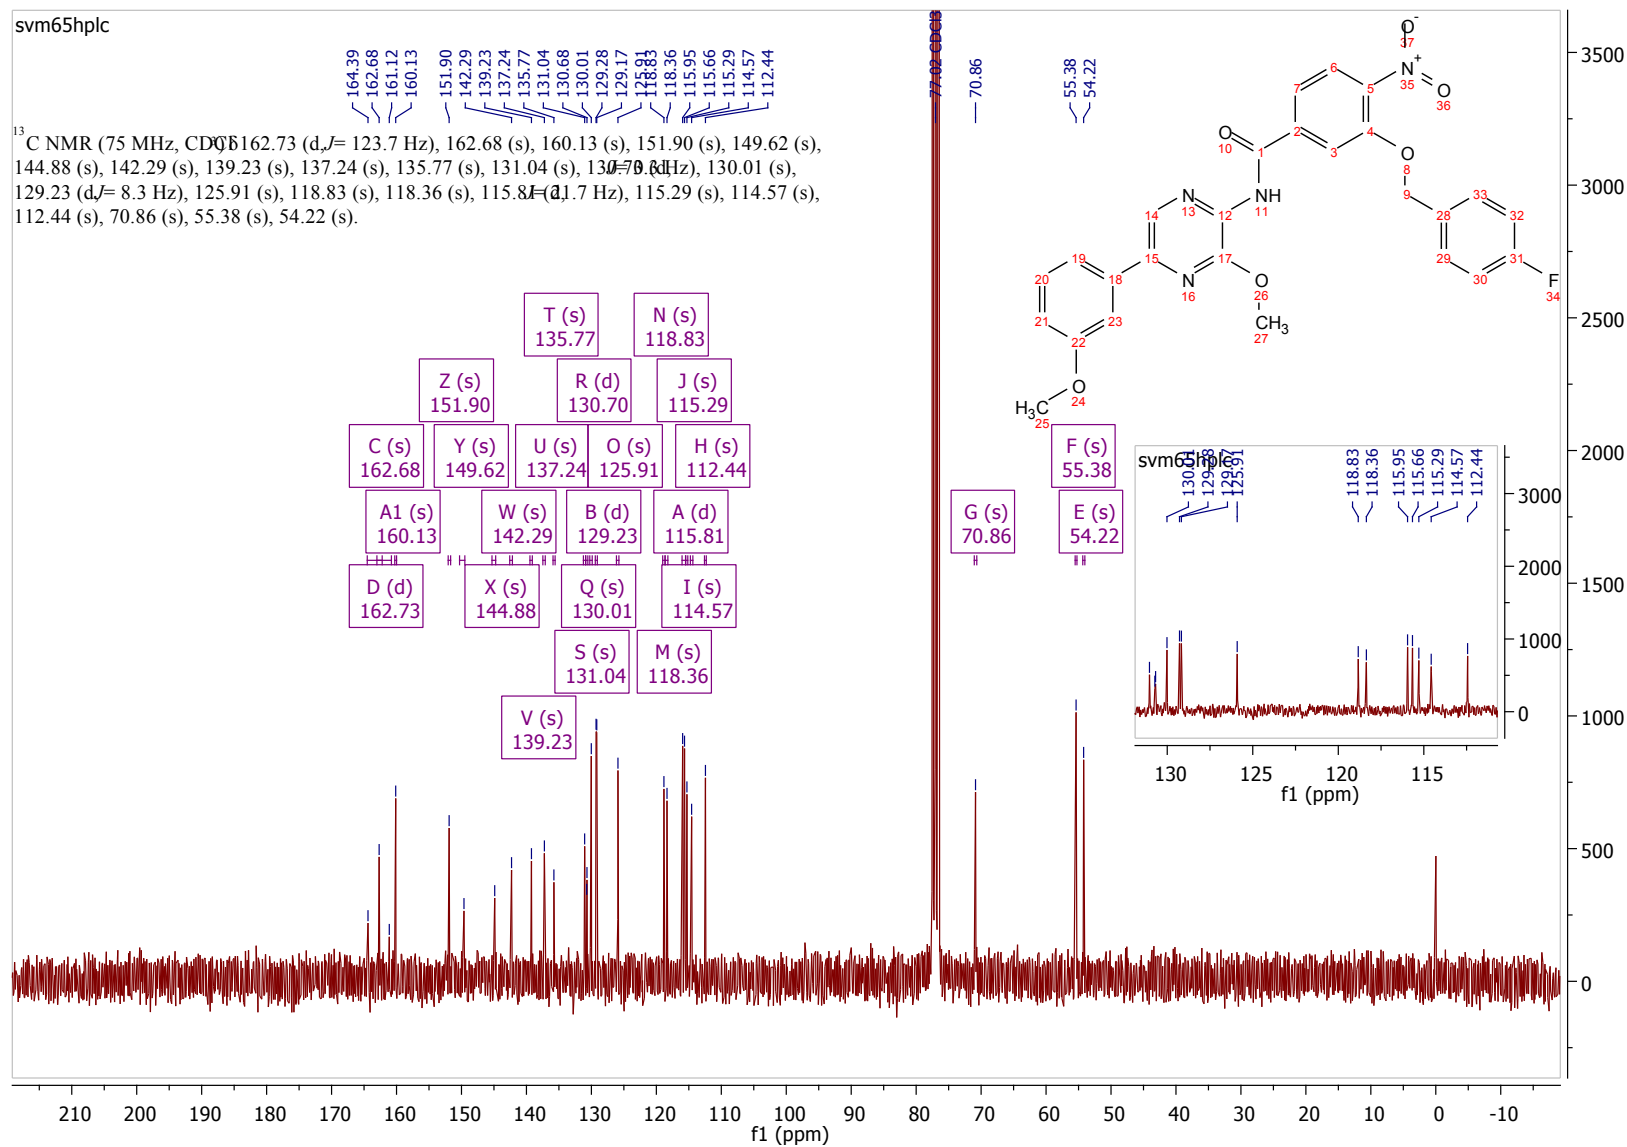

15a

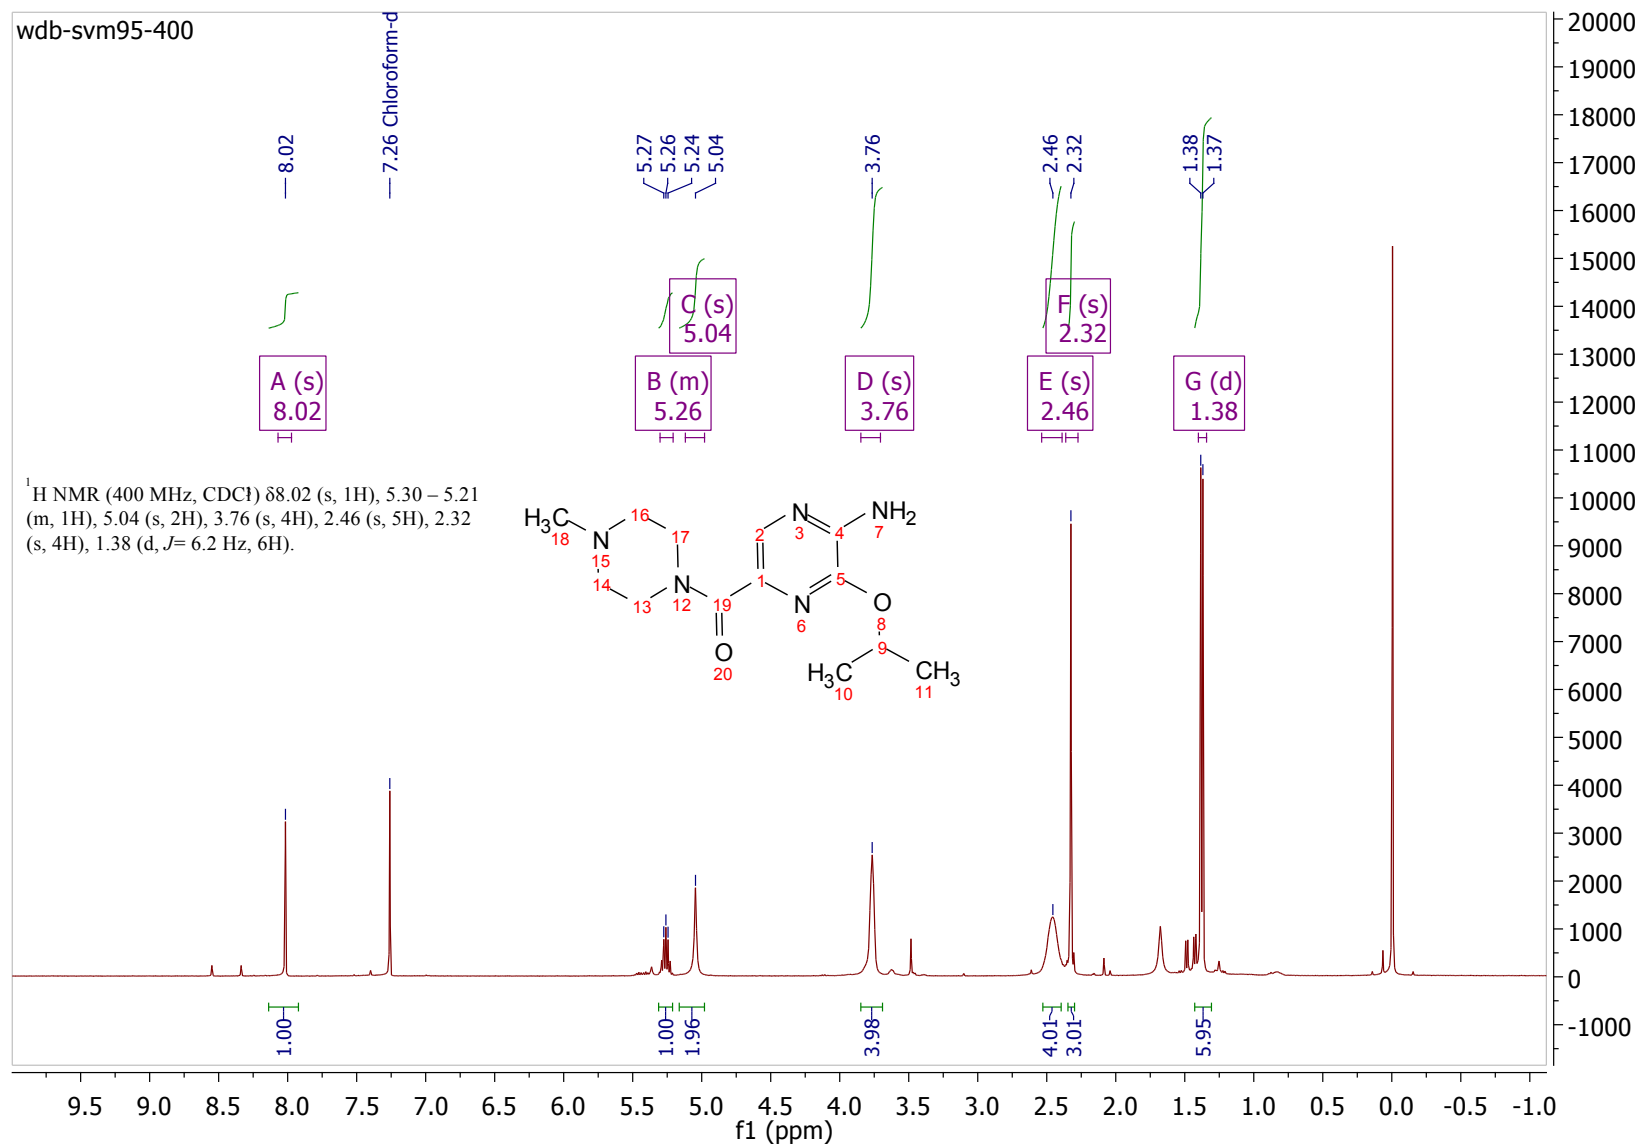

15a

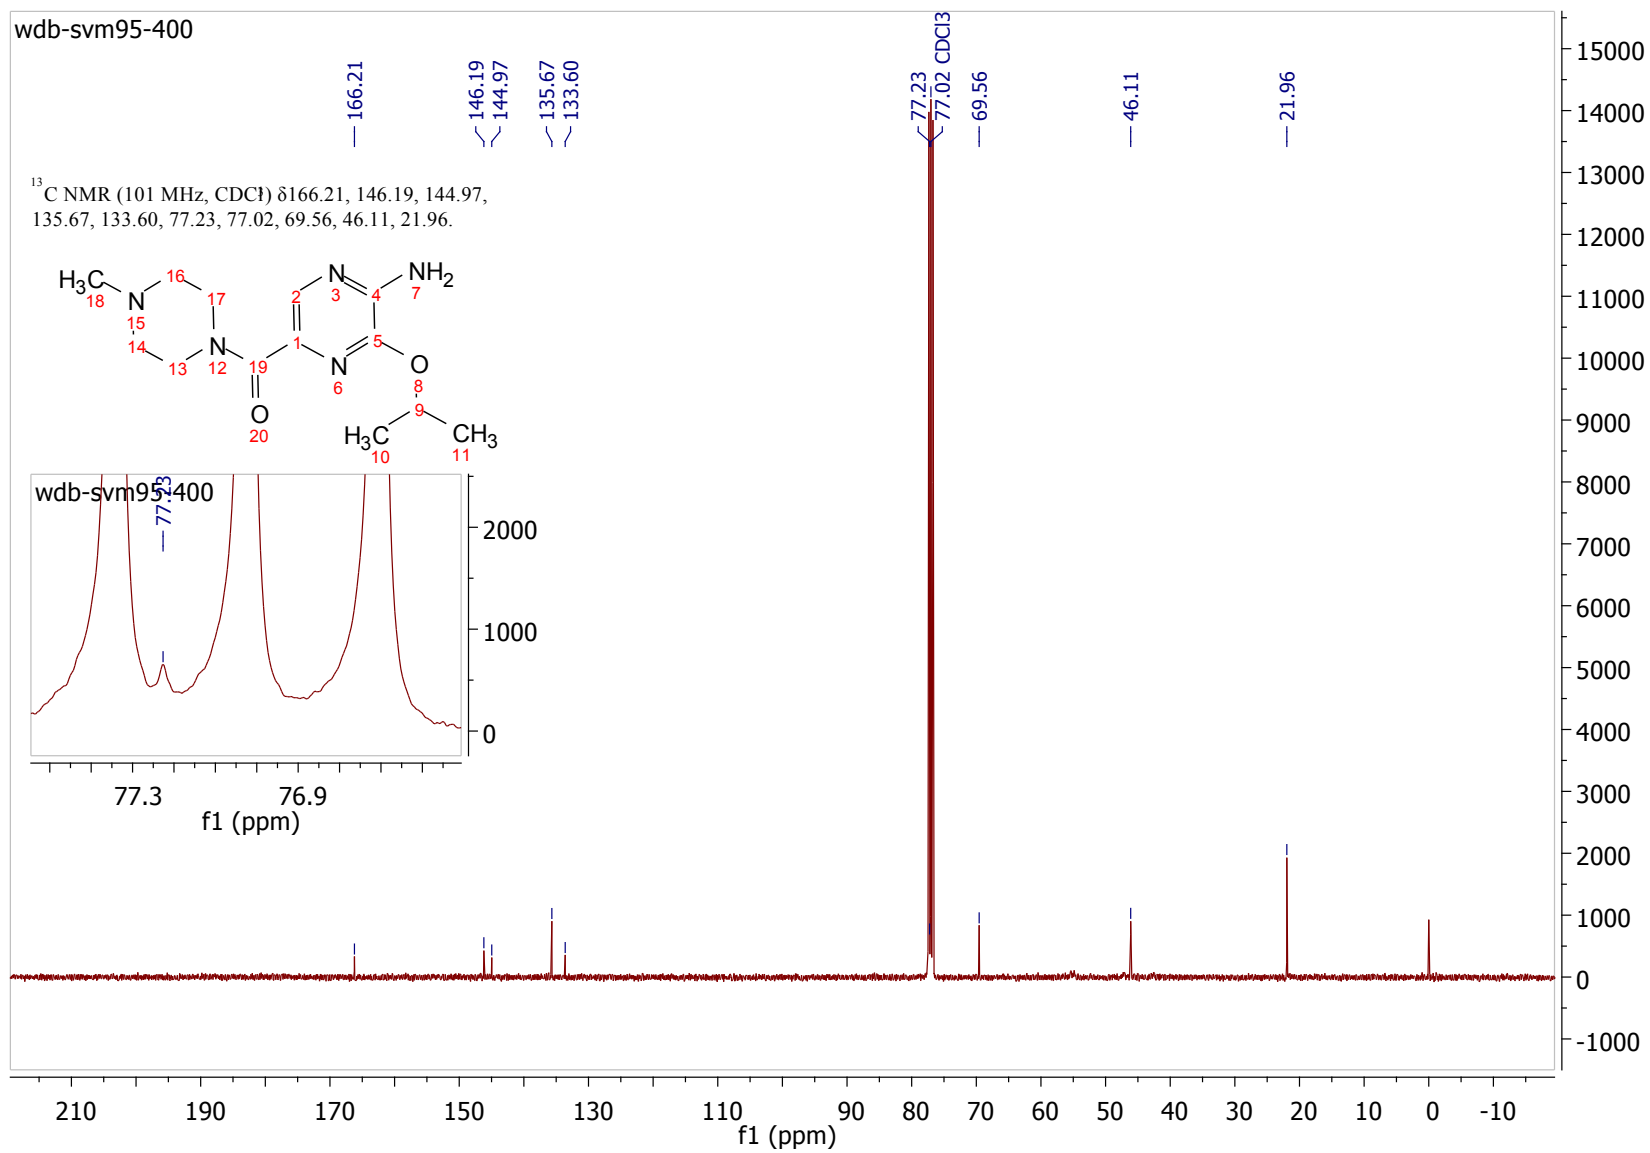

## 15b

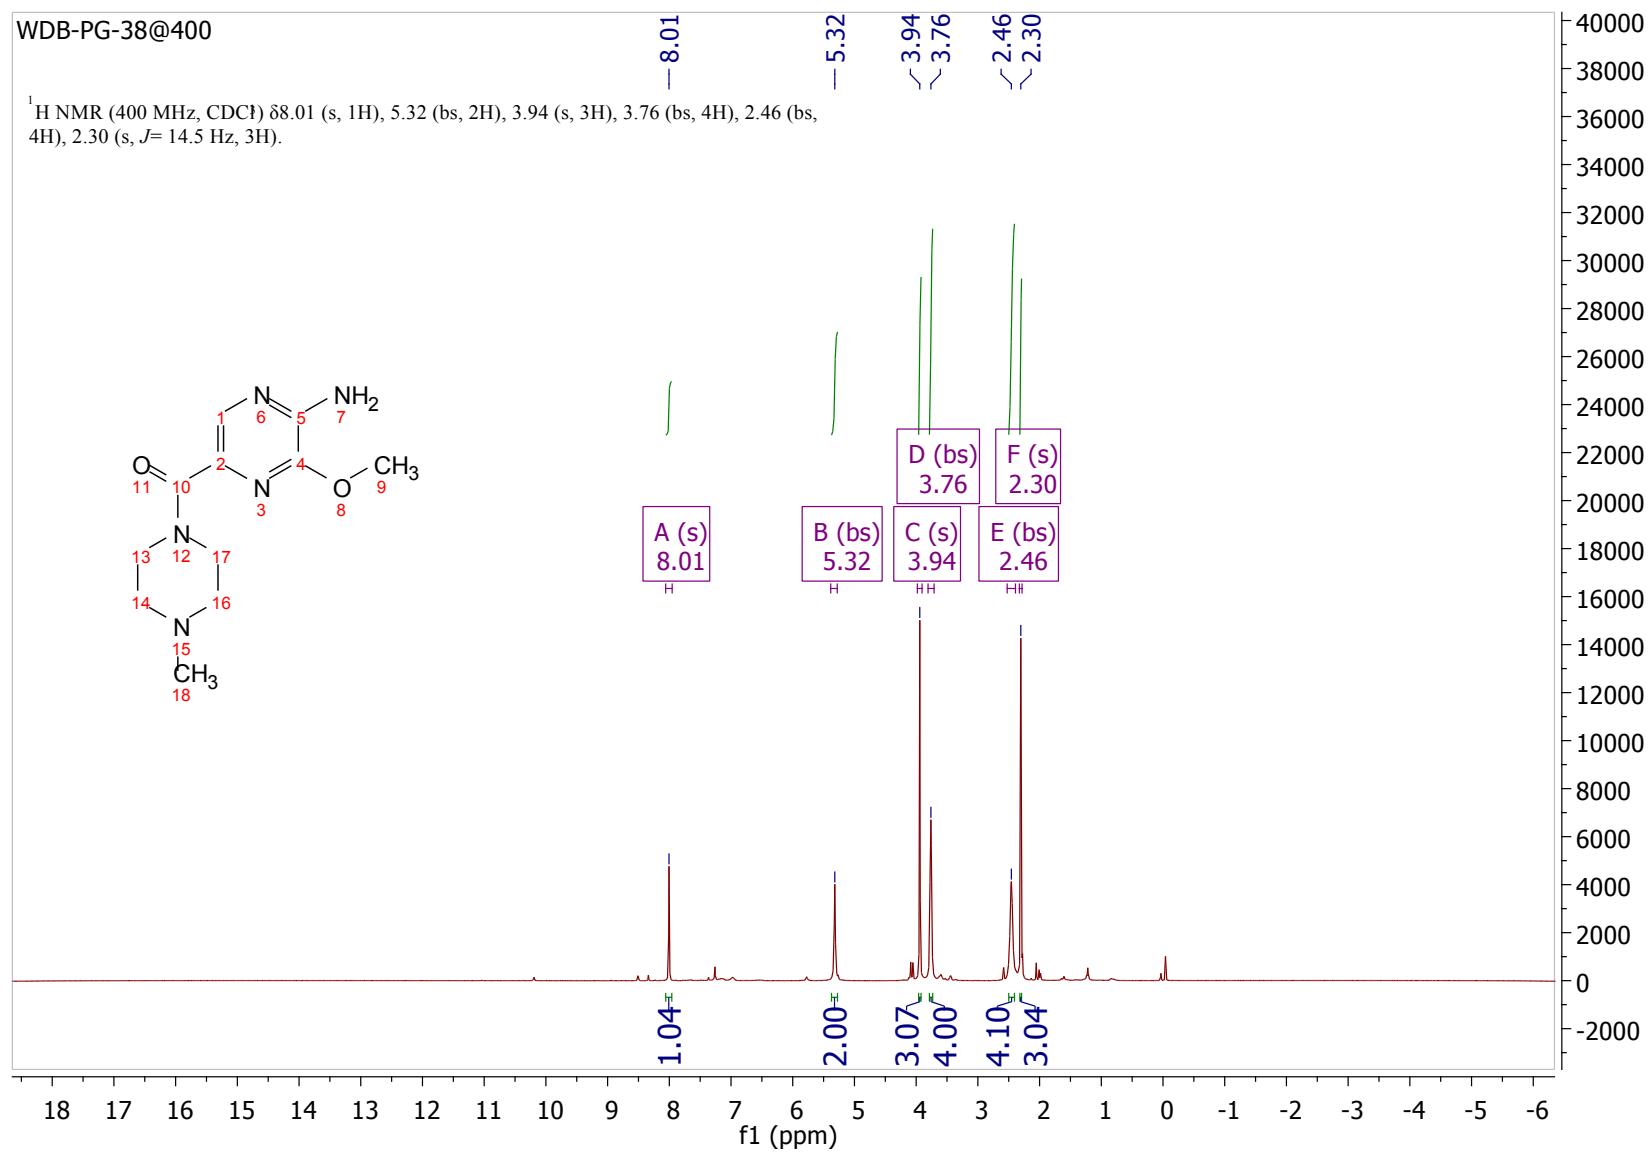

15b

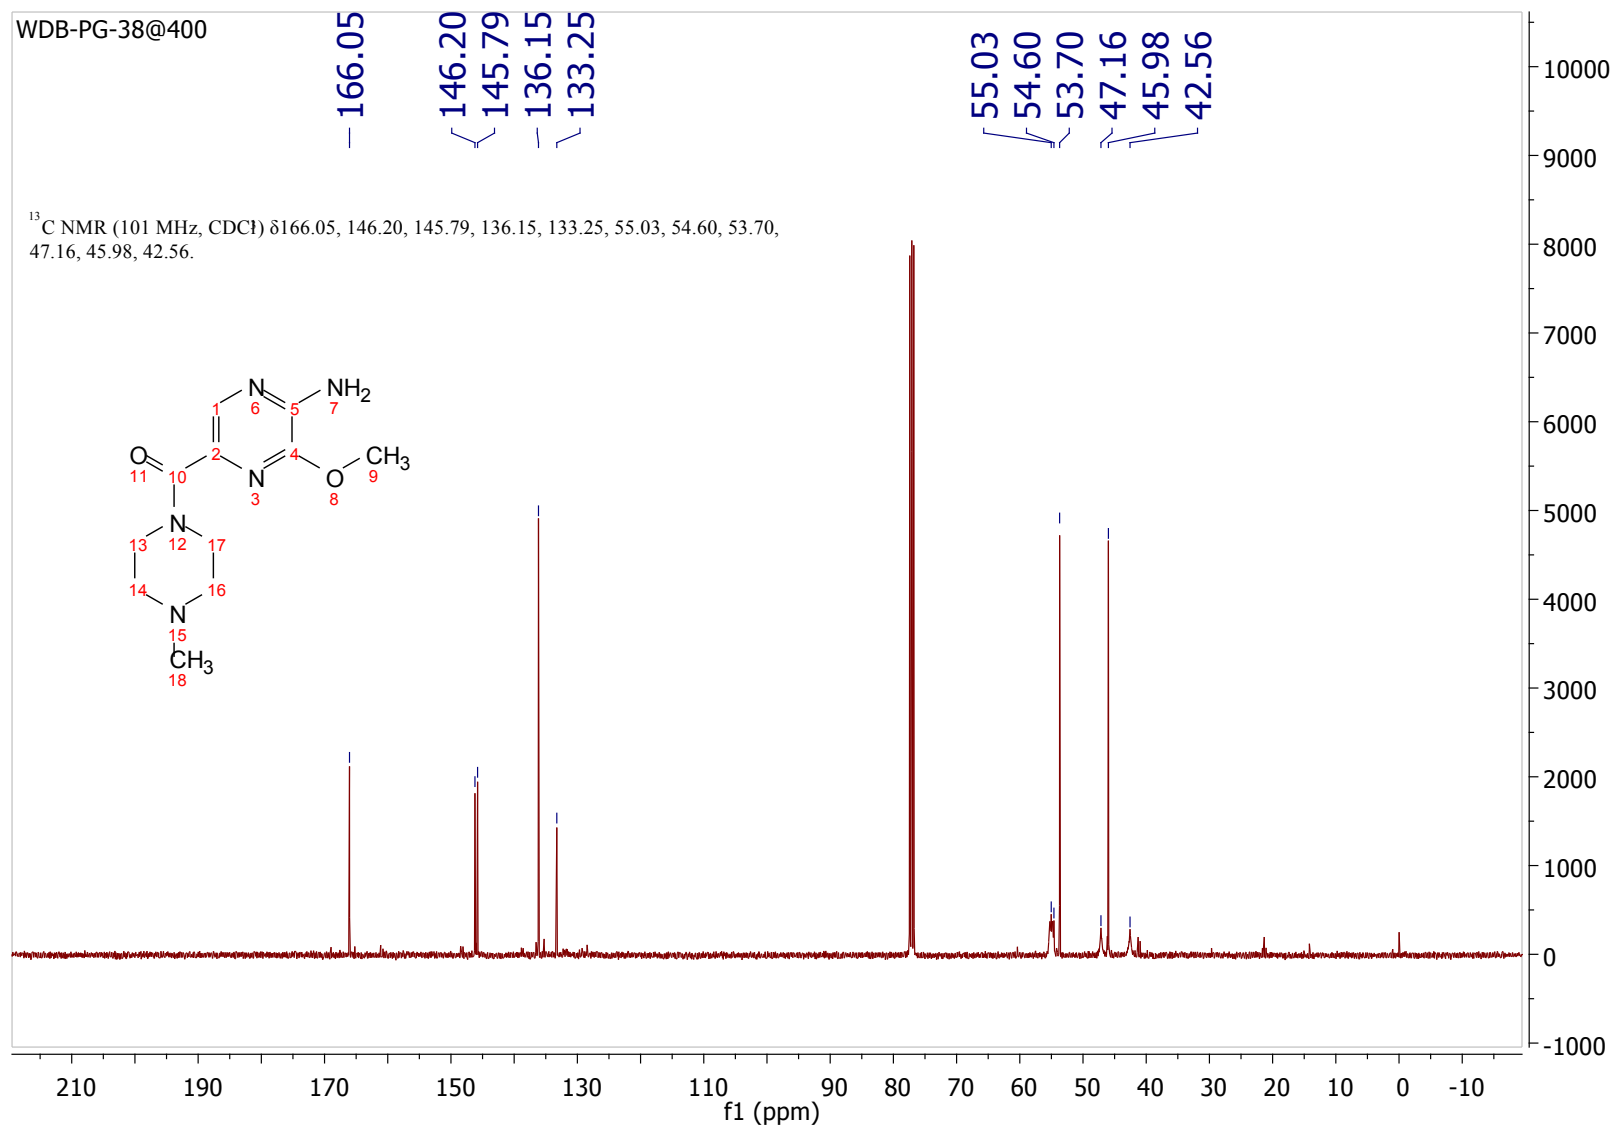

***tert*-butyl *N*-[(*tert*-butoxy)carbonyl]-*N*-(5-{[5-(4-methylpiperazine-1-carbonyl)-3-(propan-2-yloxy)pyrazin-2-yl]carbamoyl}-3-(2-methylpropoxy)pyrazin-2-yl)carbamate**

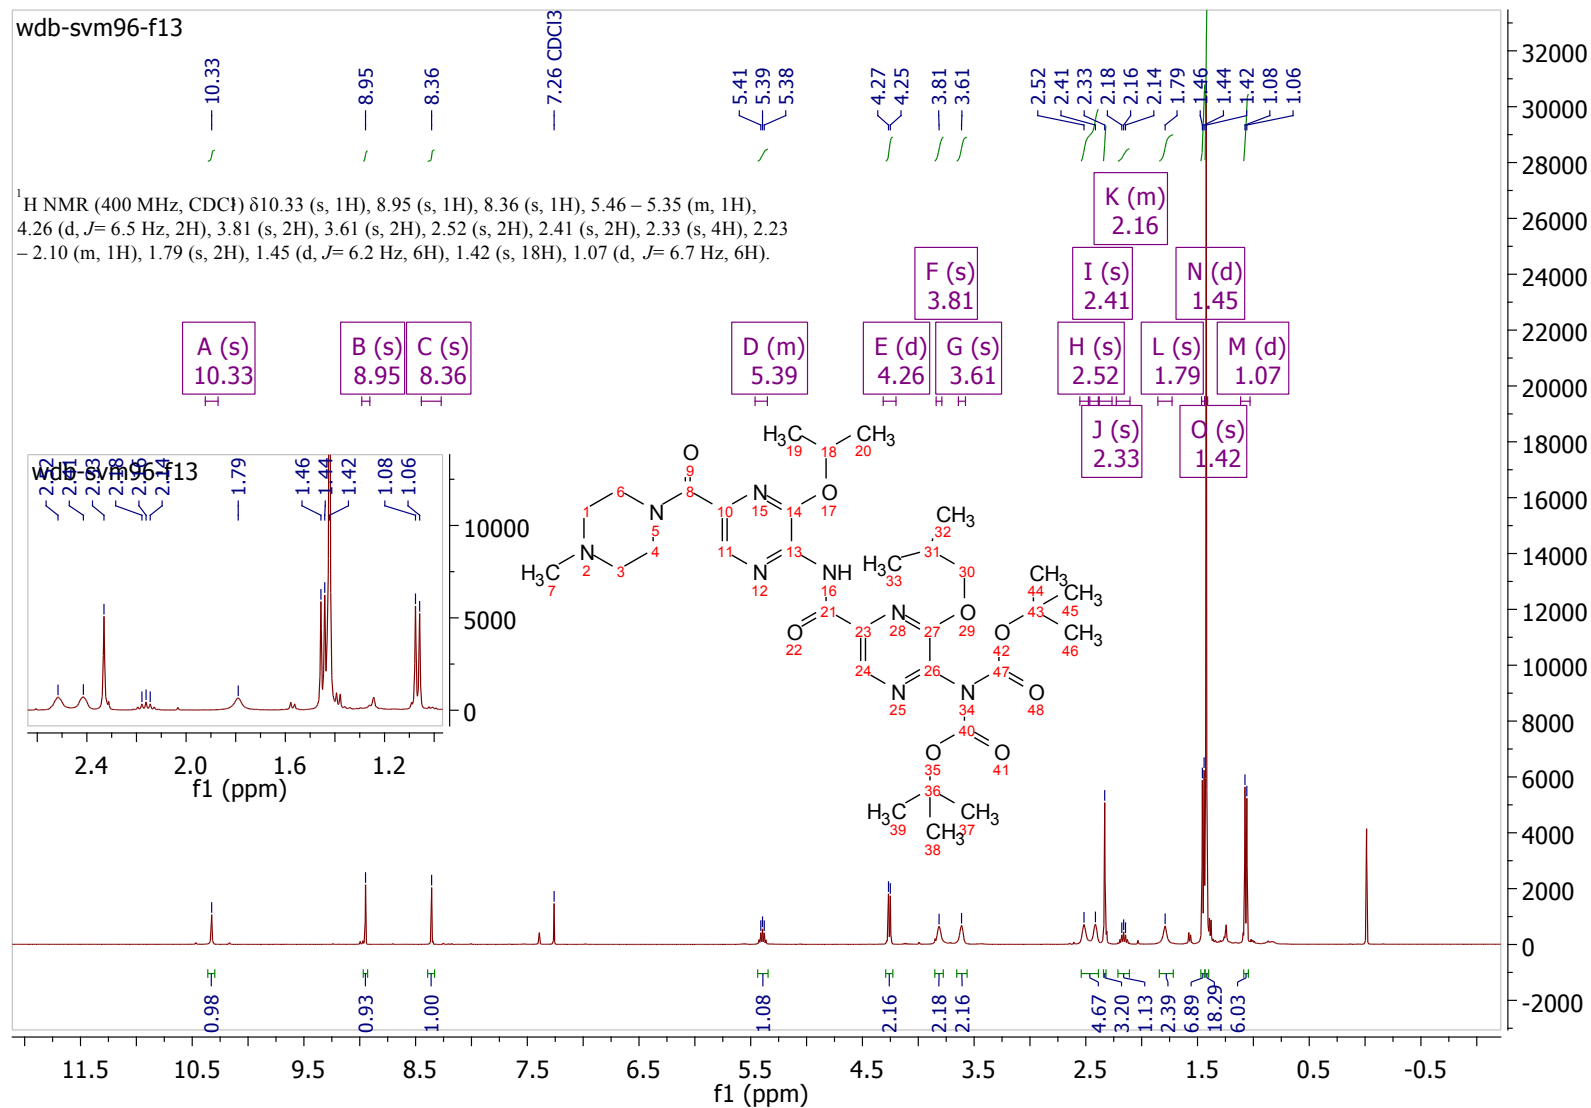

***tert*-butyl *N*-[(*tert*-butoxy)carbonyl]-*N*-(5-{[5-(4-methylpiperazine-1-carbonyl)-3-(propan-2-yloxy)pyrazin-2-yl]carbamoyl}-3-(2-methylpropoxy)pyrazin-2-yl)carbamate**

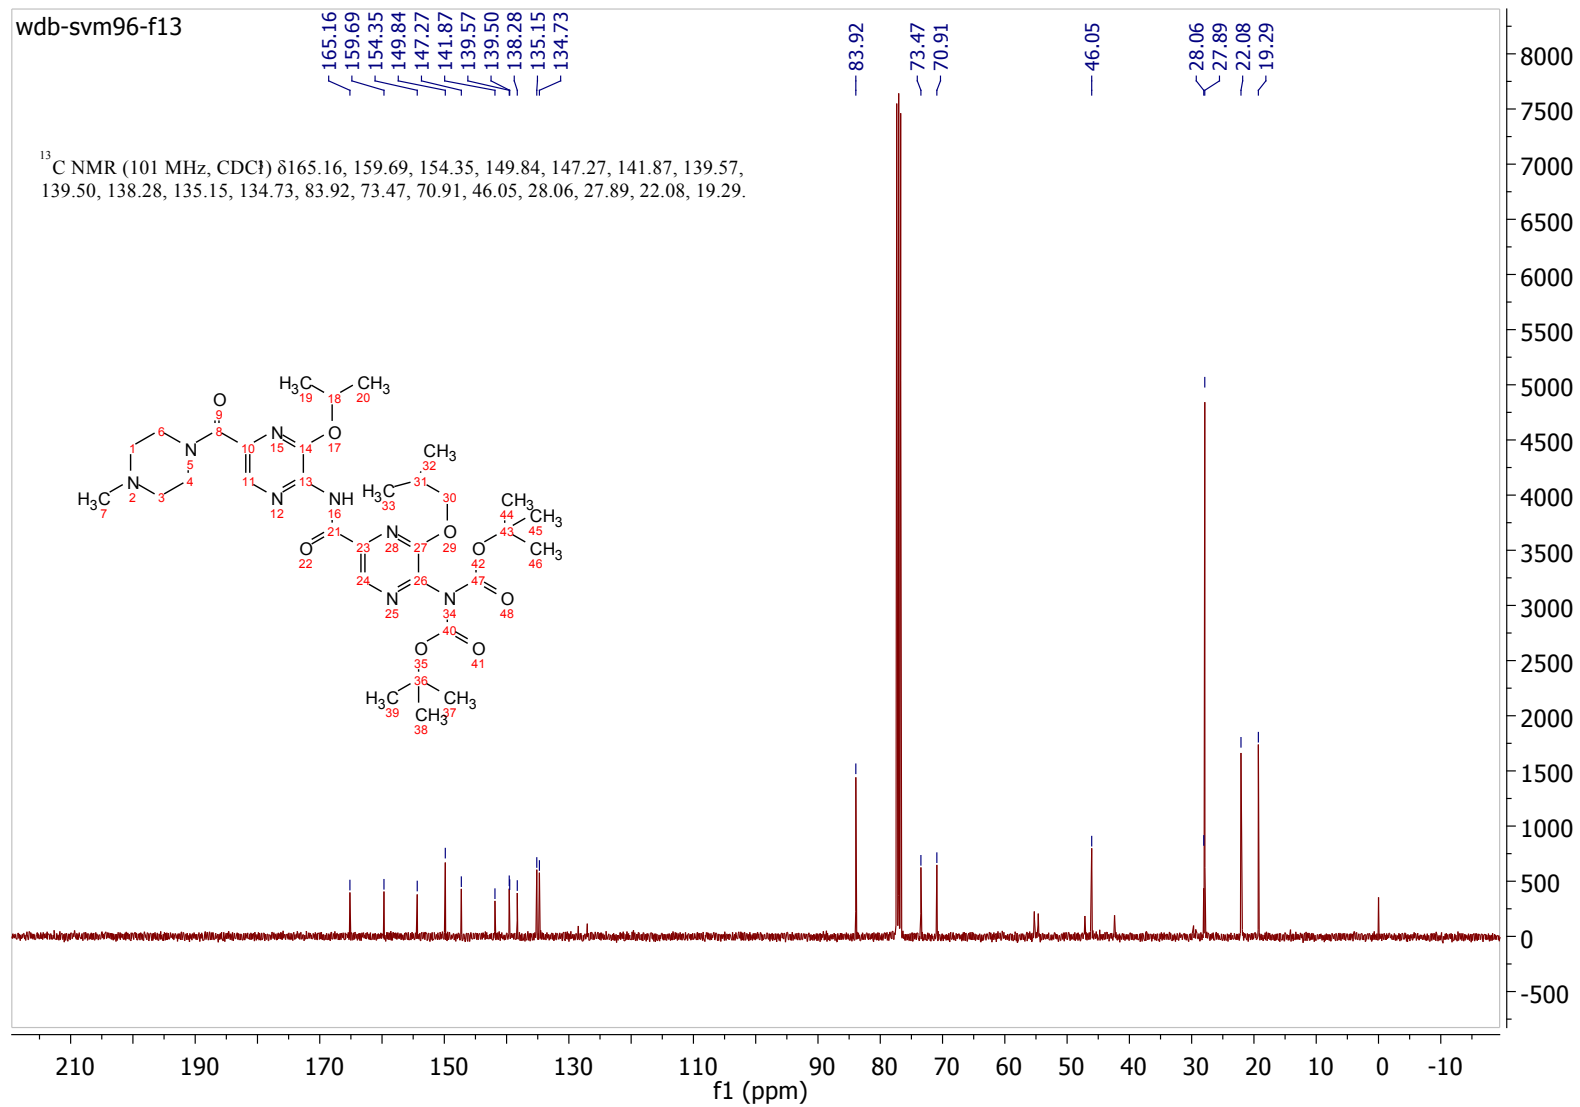



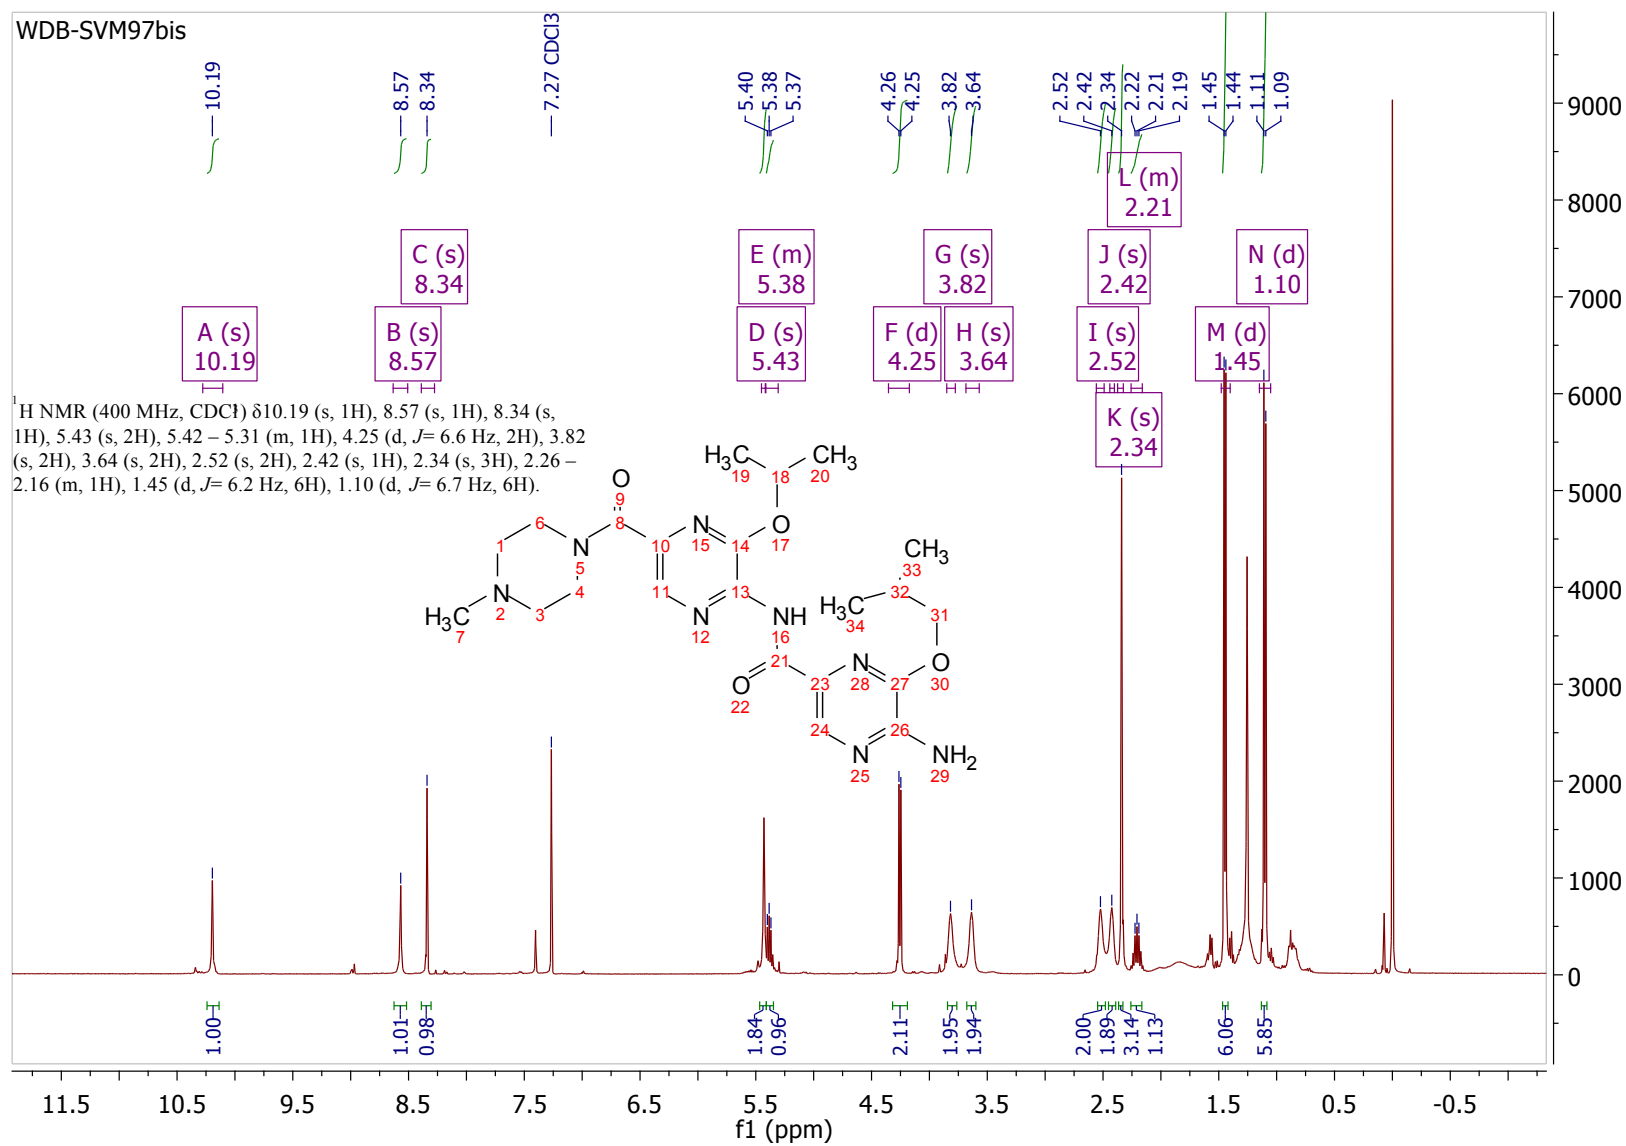

16

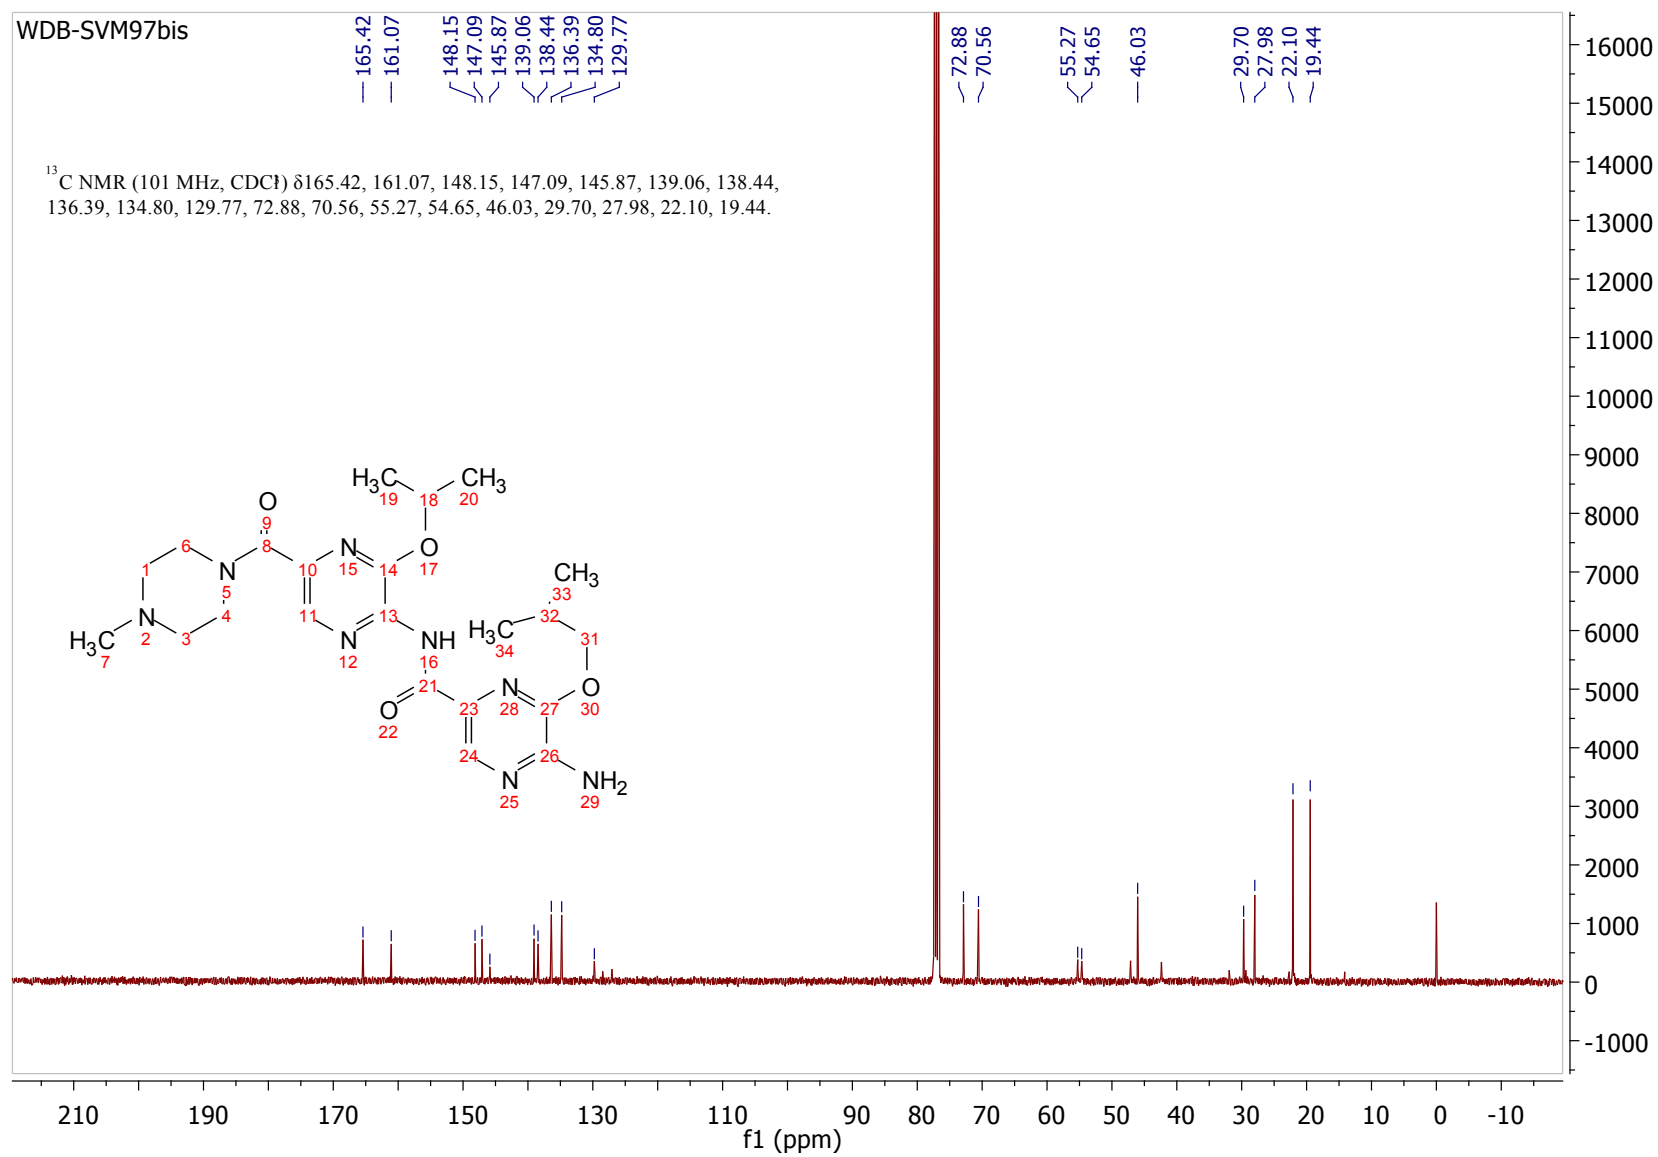

## 6 References

1. Millet, R.; Domarkas, J.; Houssin, R.; Gilleron, P.; Goossens, J. F.; Chavatte, P.; Loge, C.; Pommery, N.; Pommery, J.; Henichart, J. P., Potent and selective farnesyl transferase inhibitors. *J. Med. Chem.* **2004**, *47* (27), 6812-6820.
2. Caldwell, J. J.; Veillard, N.; Collins, I., Design and synthesis of 2(1H)-pyrazinones as inhibitors of protein kinases. *Tetrahedron* **2012**, *68* (47), 9713-9728.
